# Supplementary material for: Drivers of genetic diversity in secondary metabolic gene clusters within a fungal species
Source: PubMed Central journal article supplement (PMC5711037; doi:10.1371/journal.pbio.2003583), 2017-11-17

# S2A

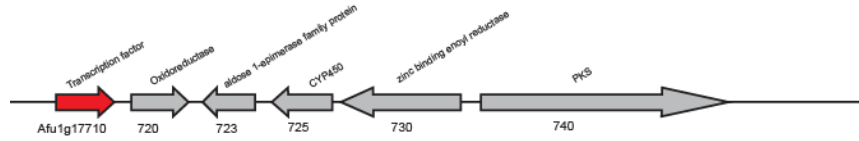

Tree scale: 0.1

## Taxonomy

- Leotiomycetes
- Sordariomycetes
- Eurotiomycetes
- Dothideomycetes
- other\_Pezizomycotina
- other\_Ascomycota
- other\_Fungi
- other\_Opisthokonta
- other\_Eukaryota
- Bacteria
- Archaea
- Viruses

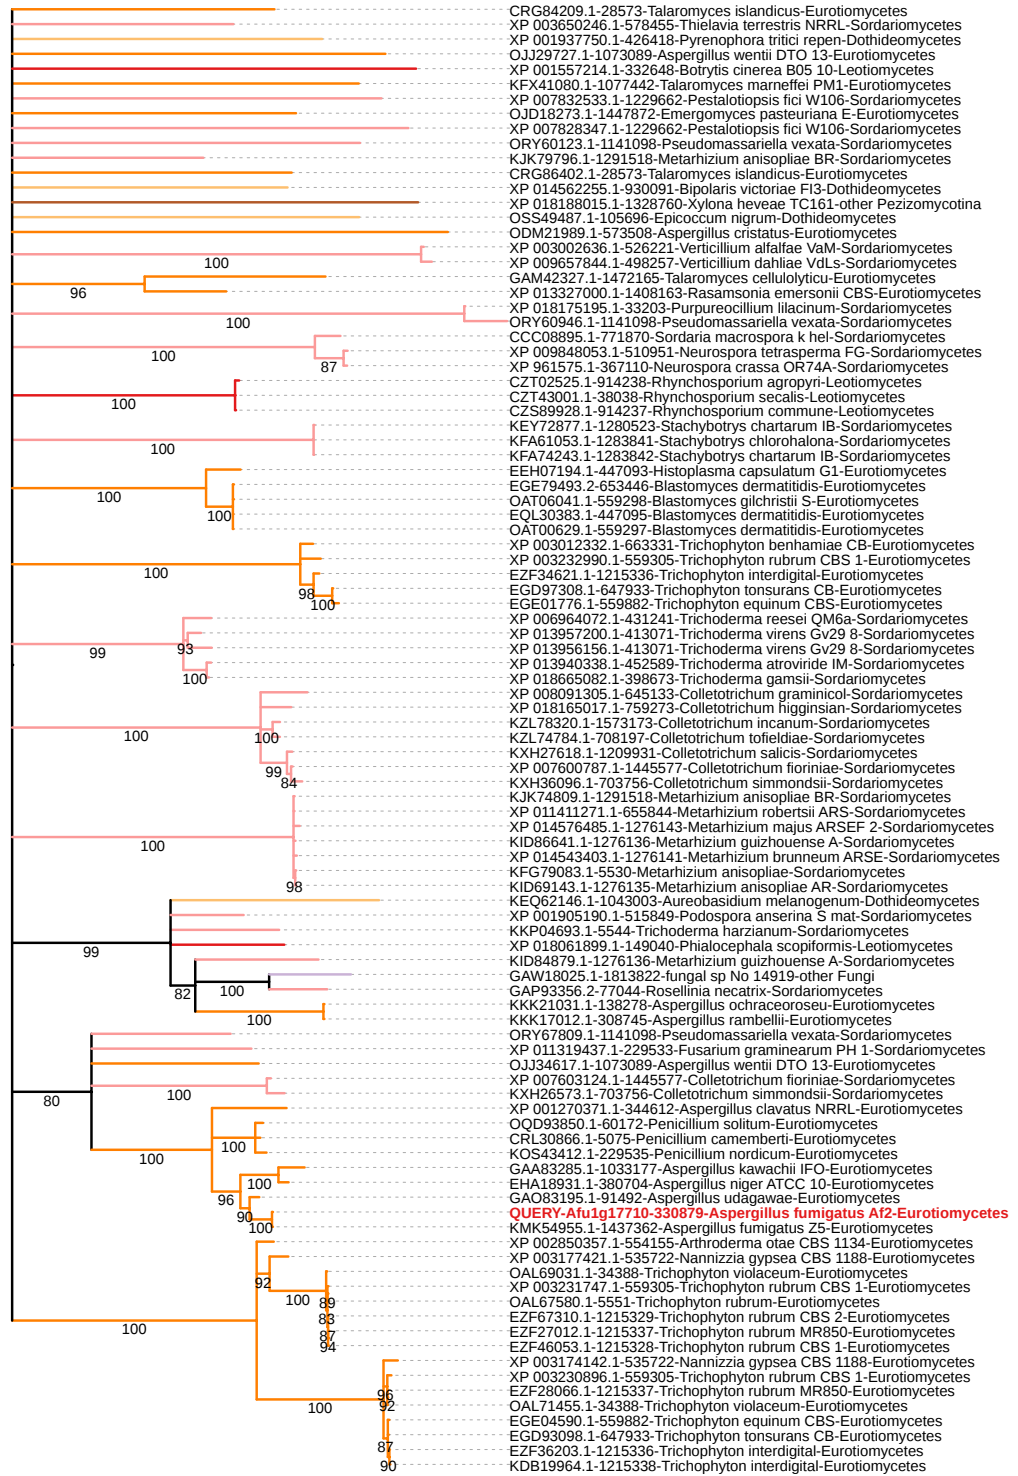

# S2B

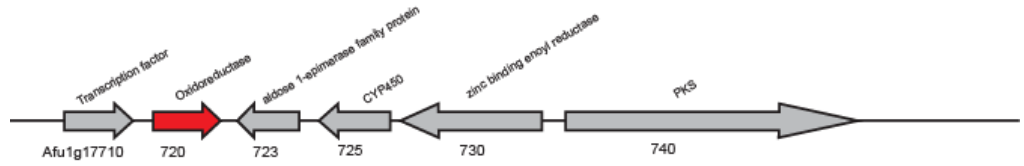

Tree scale: 0.1

## Taxonomy

- Leotiomyces
- Sordariomycetes
- Eurotiomycetes
- Dothideomycetes
- other\_Pezizomycotina
- other\_Ascomycota
- other\_Fungi
- other\_Opisthokonta
- other\_Eukaryota
- Bacteria
- Archaea
- Viruses

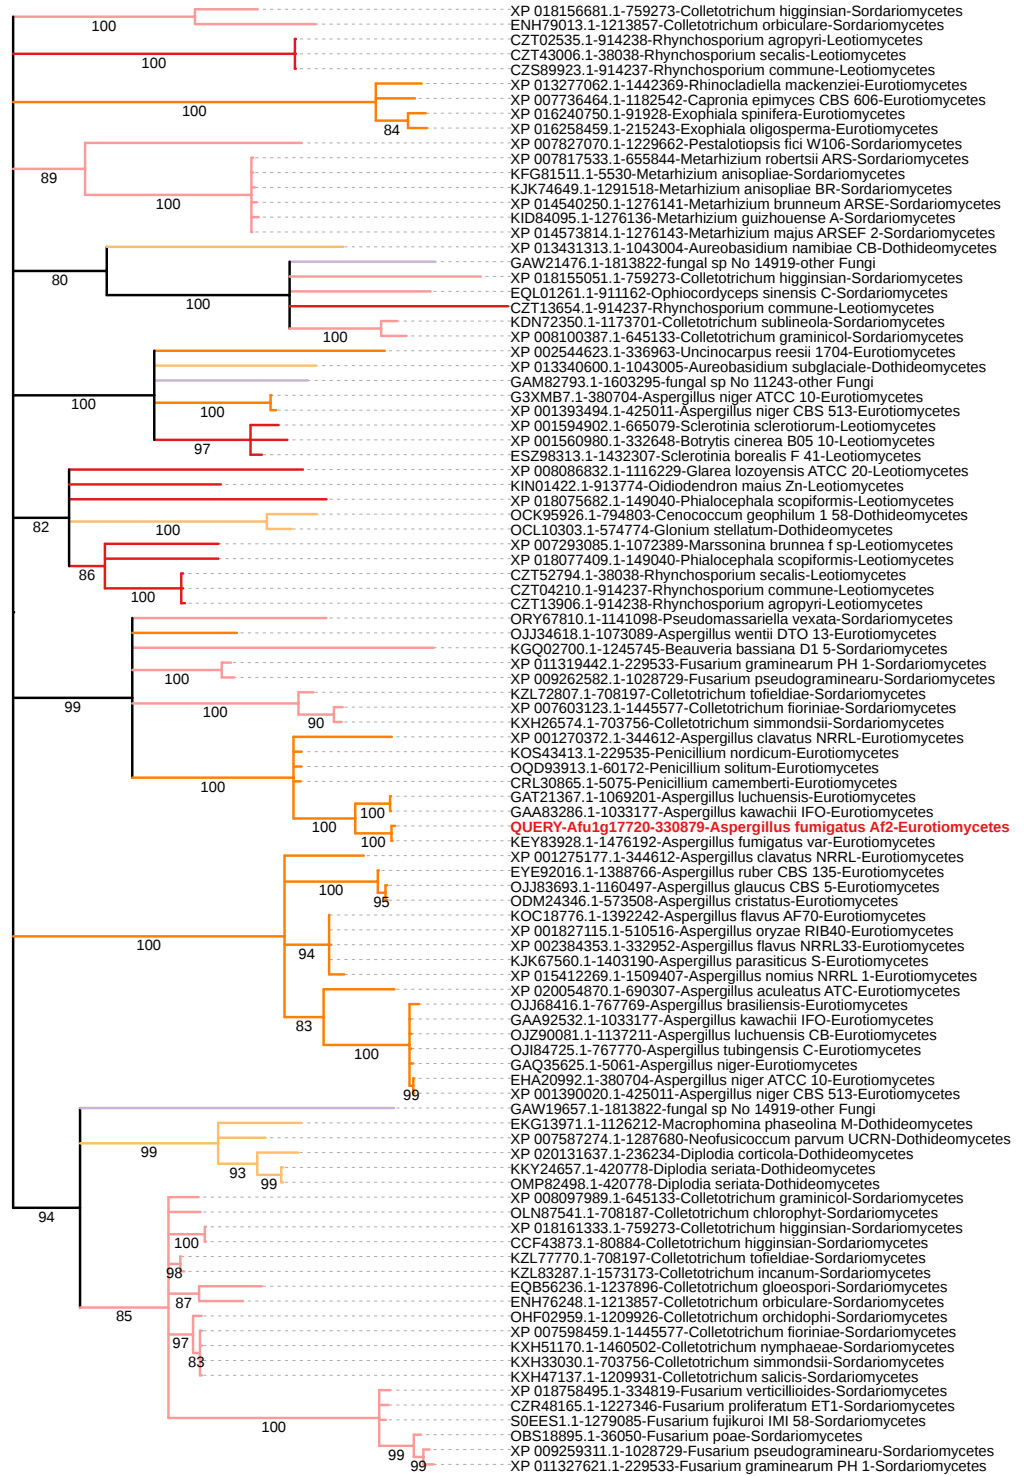

# S2C

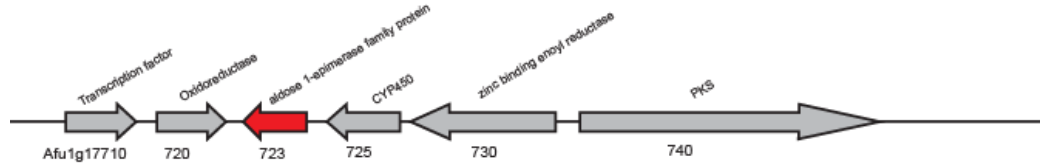

Tree scale: 0.1

## Taxonomy

- Leotiomycetes
- Sordariomycetes
- Eurotiomycetes
- Dothideomycetes
- other\_Pezizomycotina
- other\_Ascomycota
- other\_Fungi
- other\_Opisthokonta
- other\_Eukaryota
- Bacteria
- Archaea
- Viruses

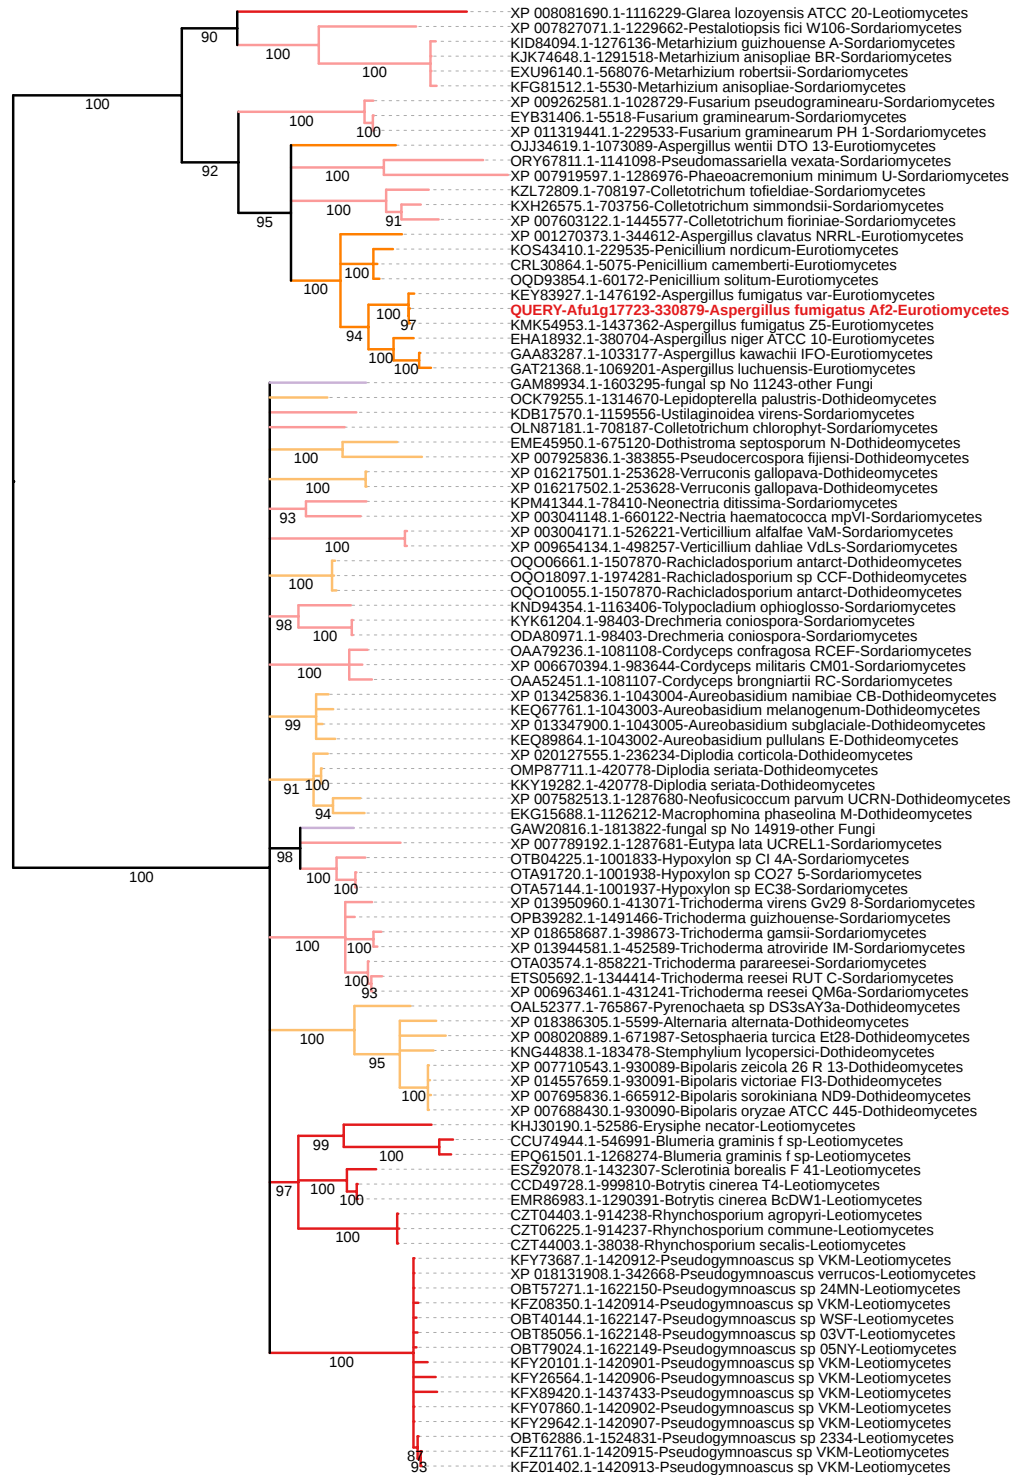

# S2D

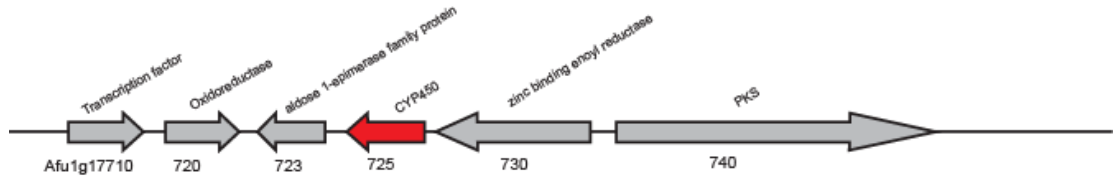

Tree scale: 0.1

## Taxonomy

- Leotiomyces
- Sordariomycetes
- Eurotiomycetes
- Dothideomycetes
- other\_Pezizomycotina
- other\_Ascomycota
- other\_Fungi
- other\_Opisthokonta
- other\_Eukaryota
- Bacteria
- Archaea
- Viruses

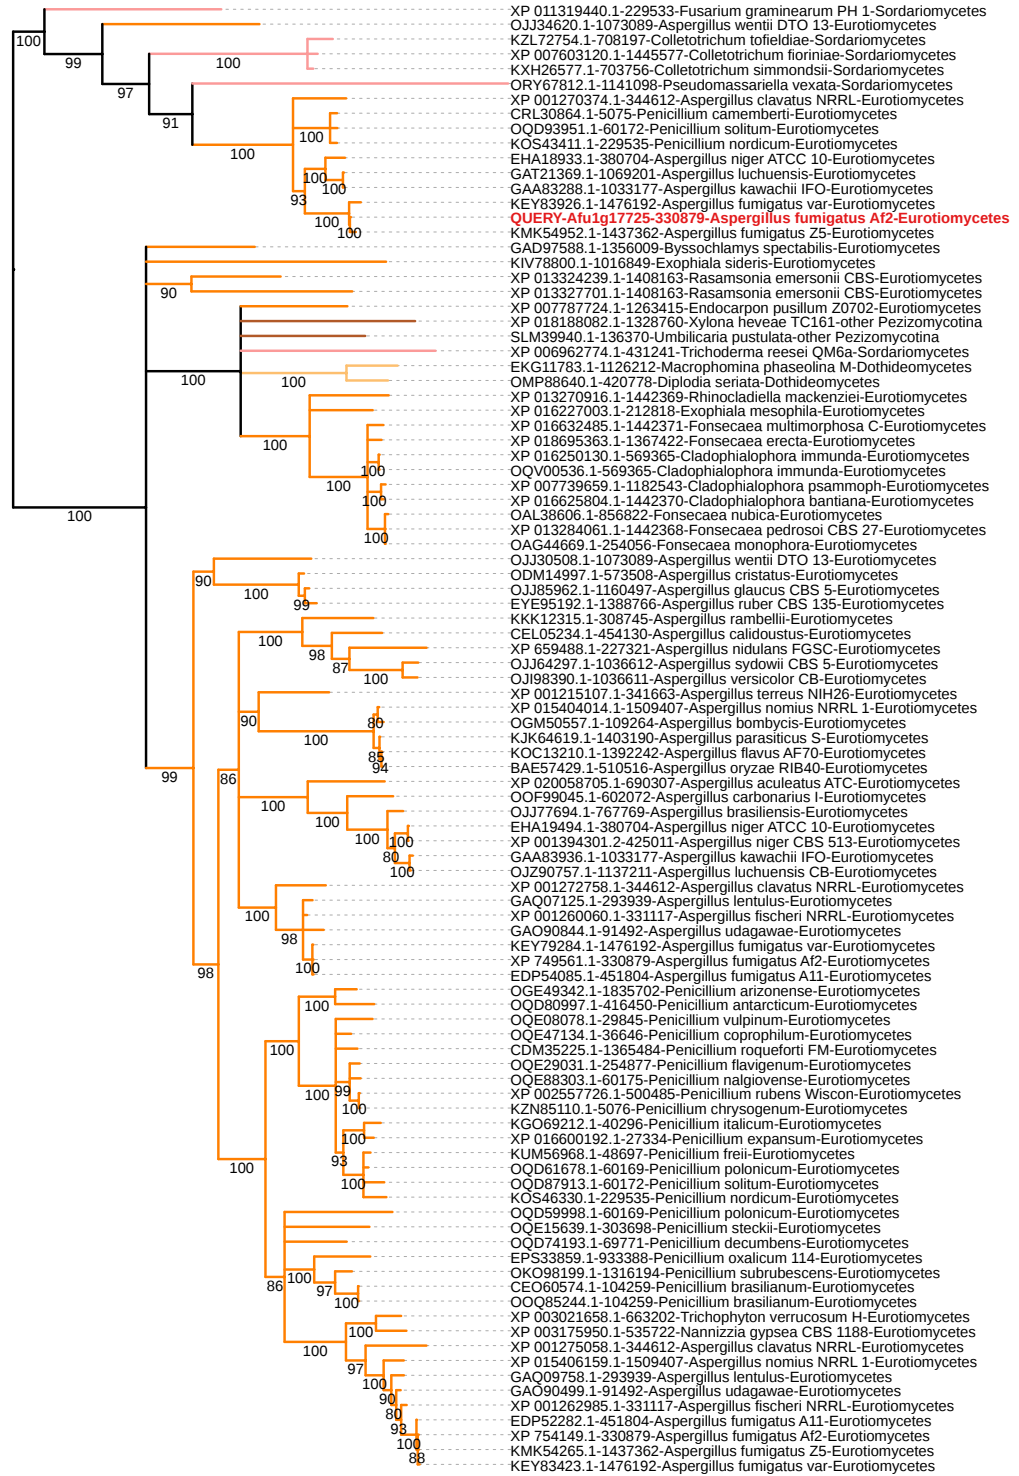

# S2E

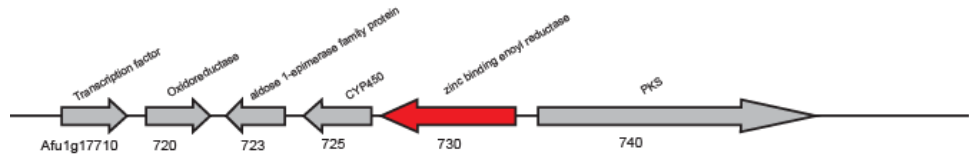

Tree scale: 0.1

## Taxonomy

- Leotiomycetes
- Sordariomycetes
- Eurotiomycetes
- Dothideomycetes
- other\_Pezizomycotina
- other\_Ascomycota
- other\_Fungi
- other\_Opisthokonta
- other\_Eukaryota
- Bacteria
- Archaea
- Viruses

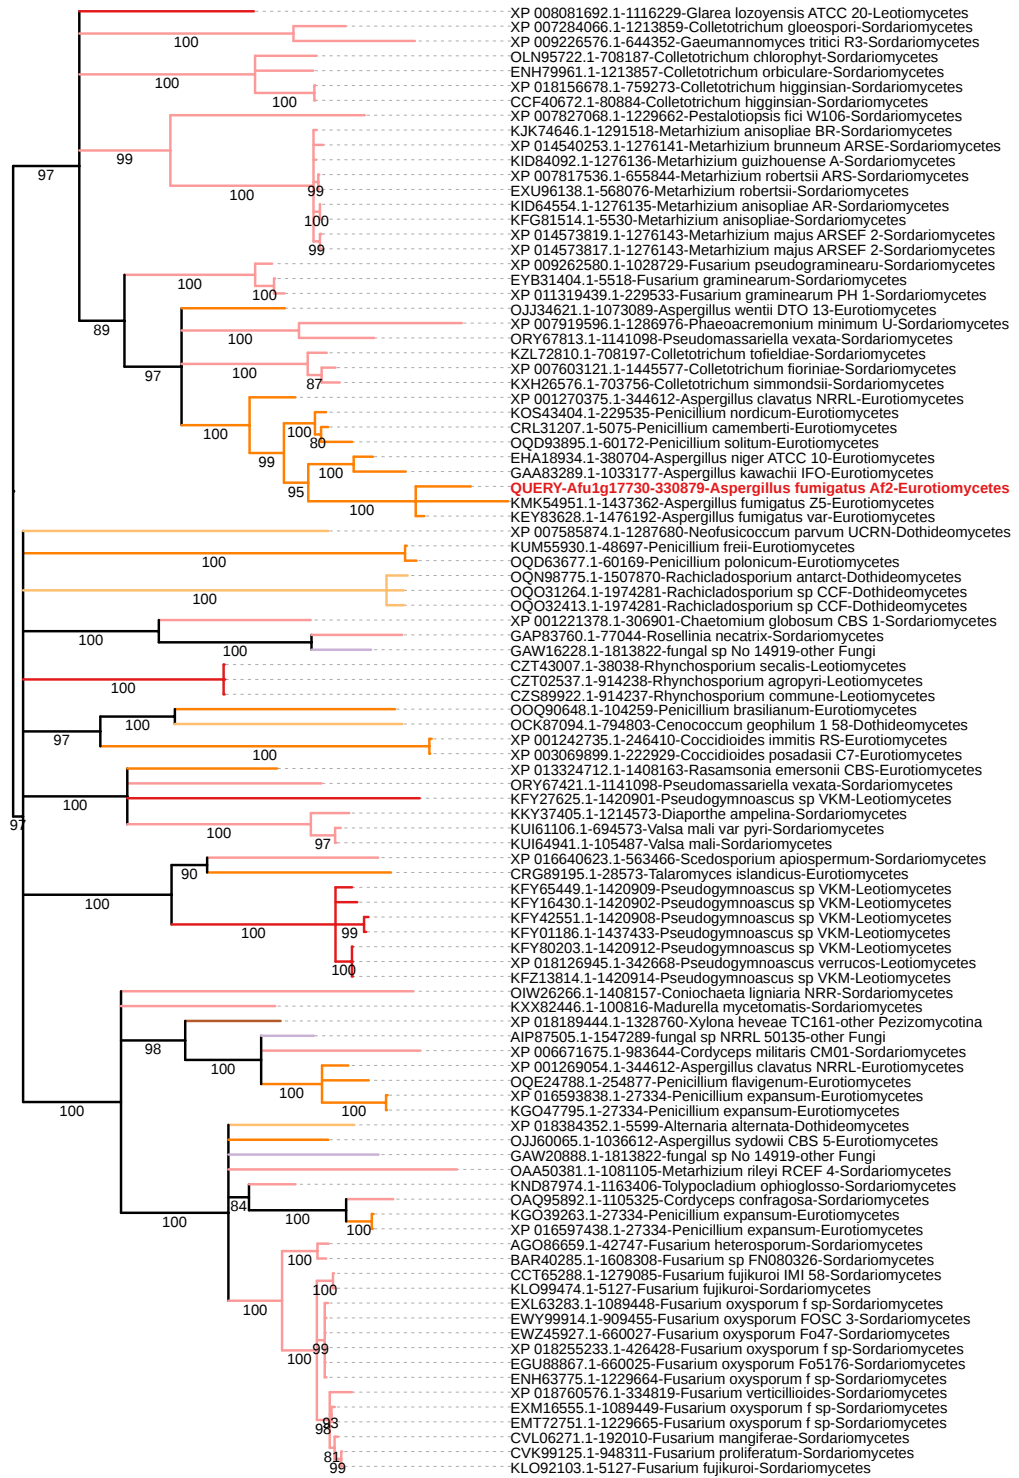

# S2F

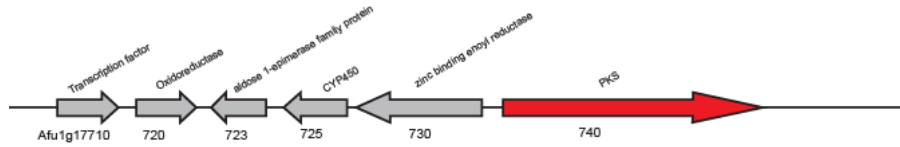

Tree scale: 0.1

## Taxonomy

- Leotiomycetes
- Sordariomycetes
- Eurotiomycetes
- Dothideomycetes
- other\_Pezizomycotina
- other\_Ascomycota
- other\_Fungi
- other\_Opisthokonta
- other\_Eukaryota
- Bacteria
- Archaea
- Viruses

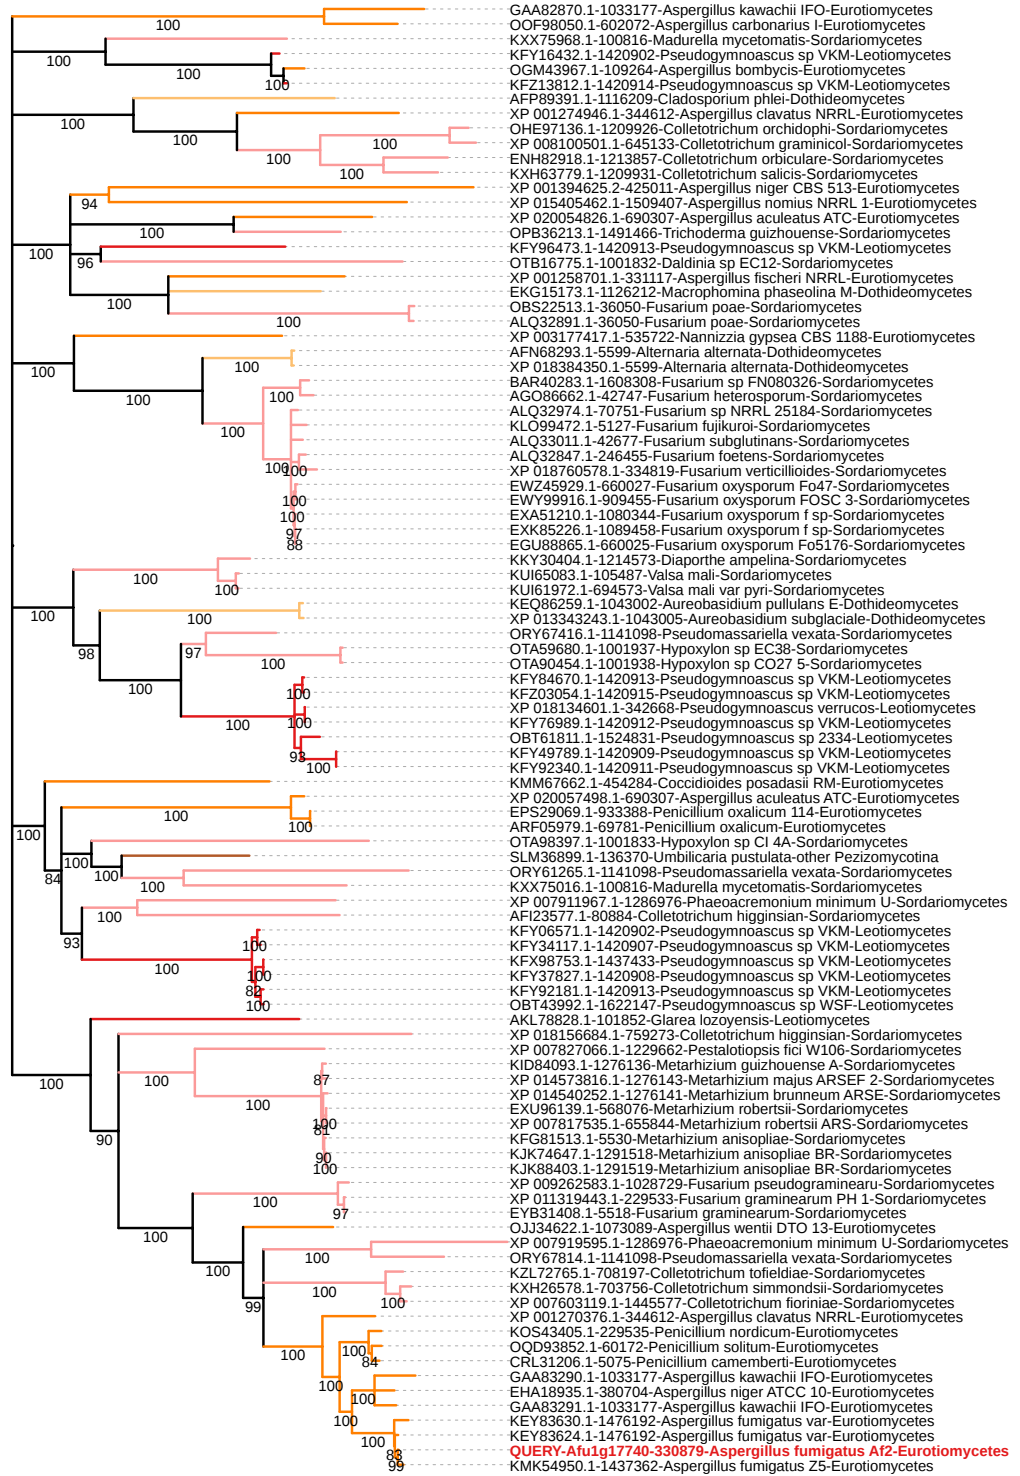

Supplement: pbio.2003583.s002.pdf [file pbio.2003583.s002.pdf]
