# Supplementary material for: Drivers of genetic diversity in secondary metabolic gene clusters within a fungal species
Source: PubMed Central journal article supplement (PMC5711037; doi:10.1371/journal.pbio.2003583), 2017-11-17

S9A

Tree scale: 0.1

Taxonomy

- Leotiomyces
- Sordariomycetes
- Eurotiomycetes
- Dothideomycetes
- other\_Pezizomycotina
- other\_Ascomycota
- other\_Fungi
- other\_Opisthokonta
- other\_Eukaryota
- Bacteria
- Archaea
- Viruses

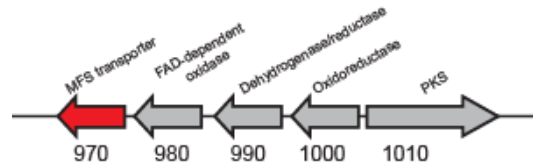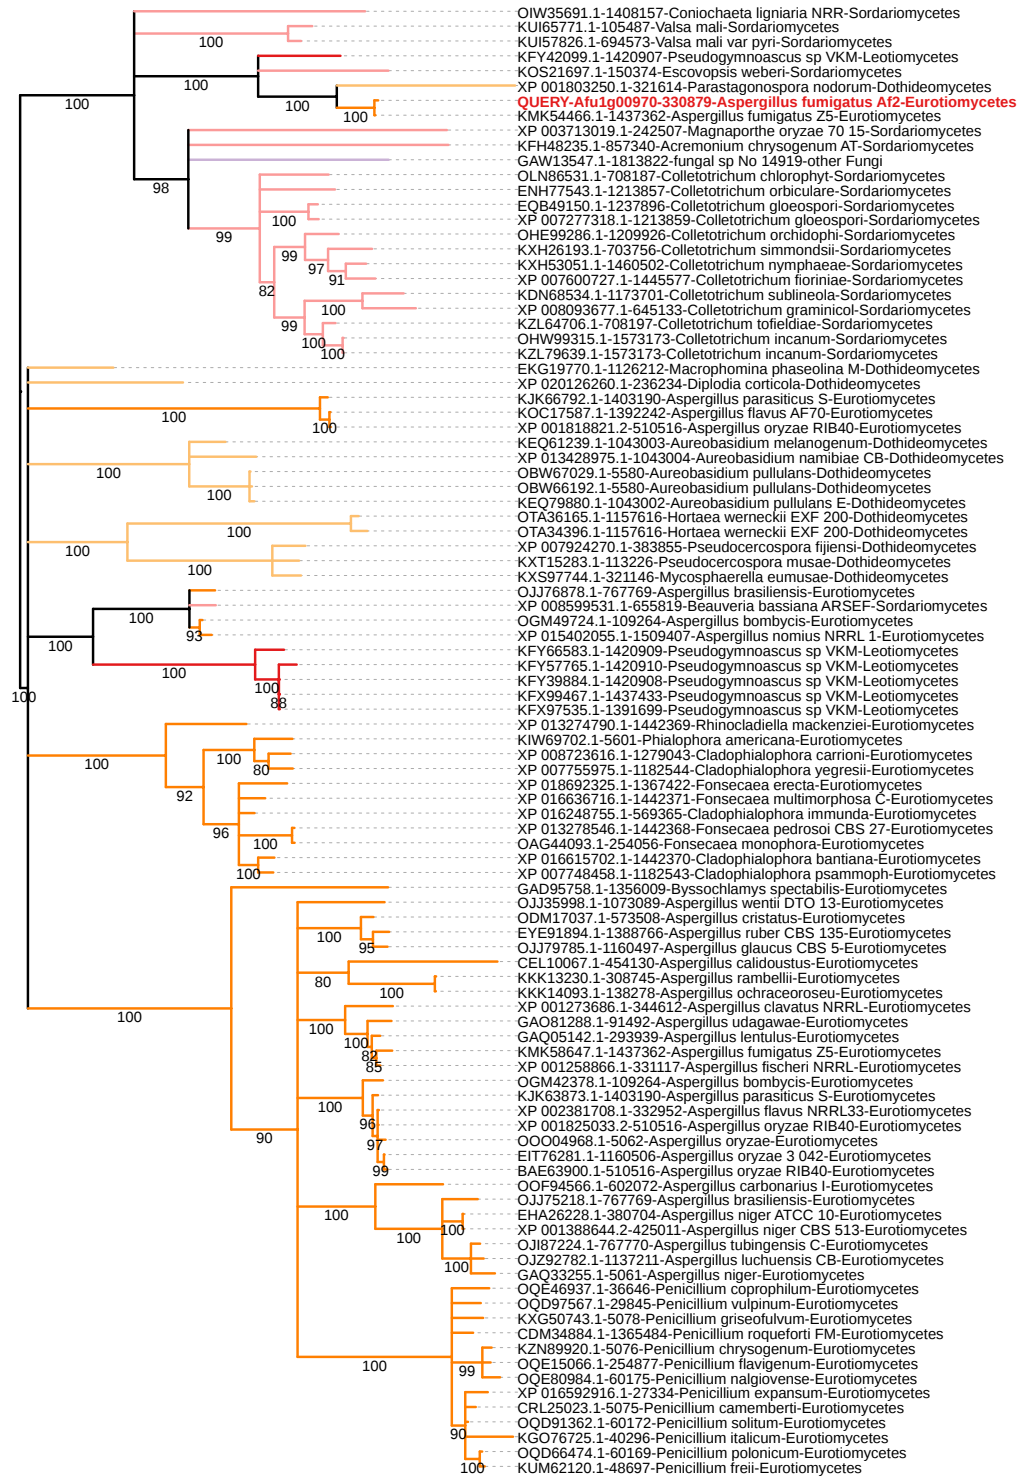

S9B

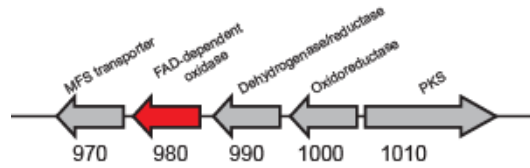

Tree scale: 0.1

**Taxonomy**

- Leotiomyces
- Sordariomycetes
- Eurotiomycetes
- Dothideomycetes
- other\_Pezizomycotina
- other\_Ascomycota
- other\_Fungi
- other\_Opisthokonta
- other\_Eukaryota
- Bacteria
- Archaea
- Viruses

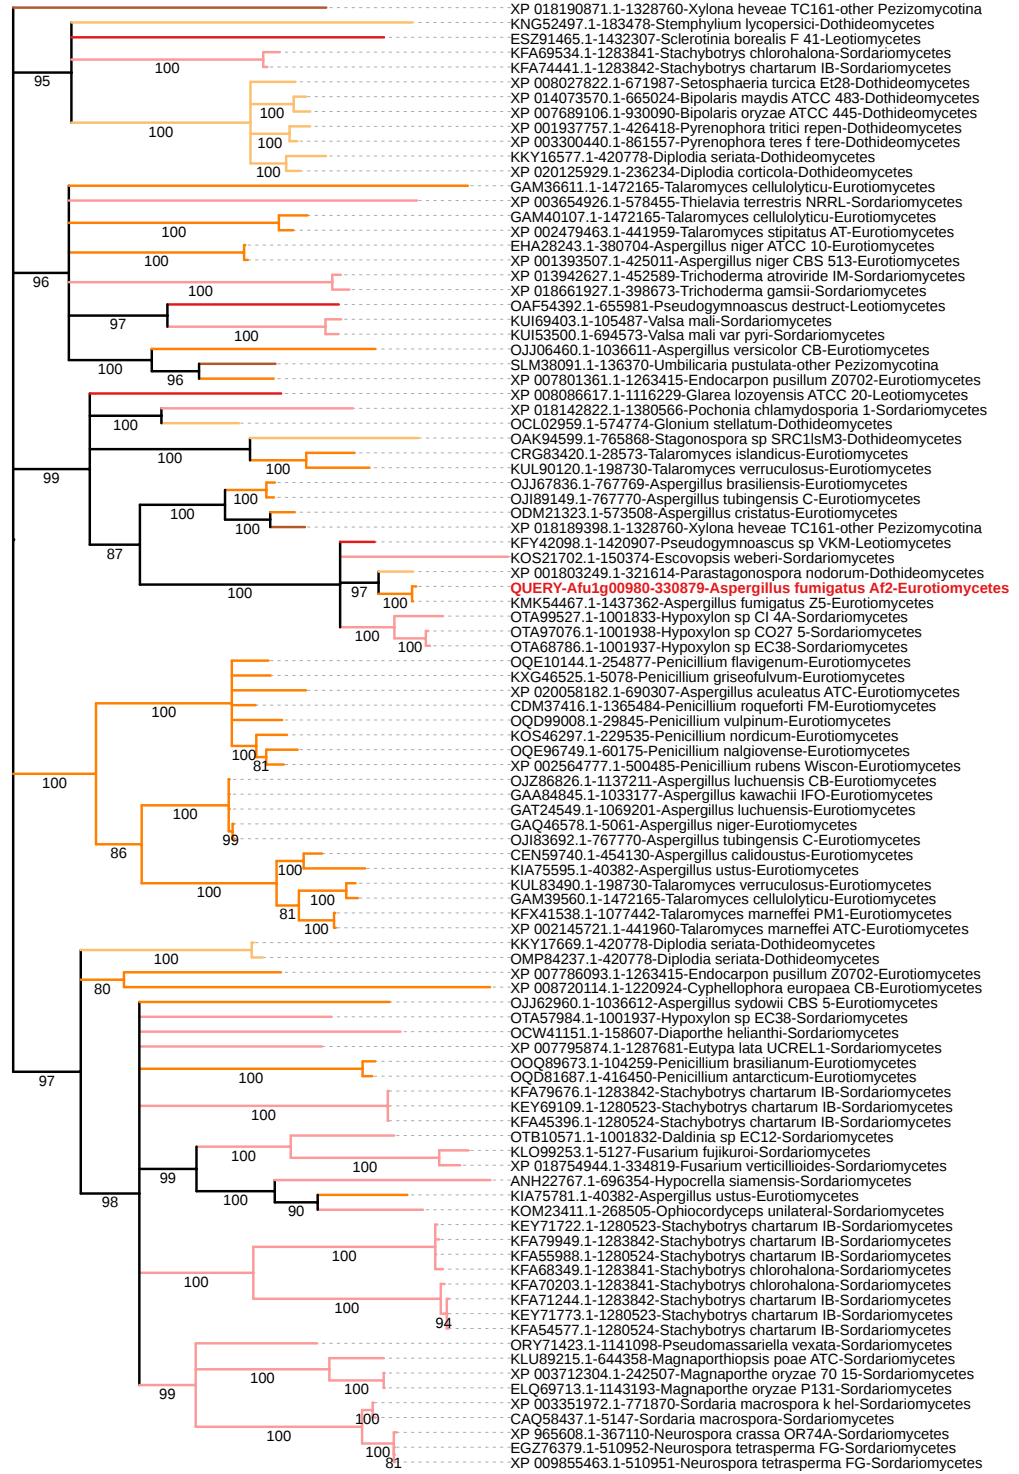

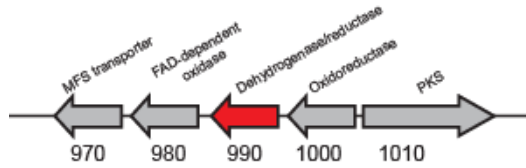

Tree scale: 0.1

**Taxonomy**

- Leotiomyces
- Sordariomycetes
- Eurotiomycetes
- Dothideomycetes
- other\_Pezizomycotina
- other\_Ascomycota
- other\_Fungi
- other\_Opisthokonta
- other\_Eukaryota
- Bacteria
- Archaea
- Viruses

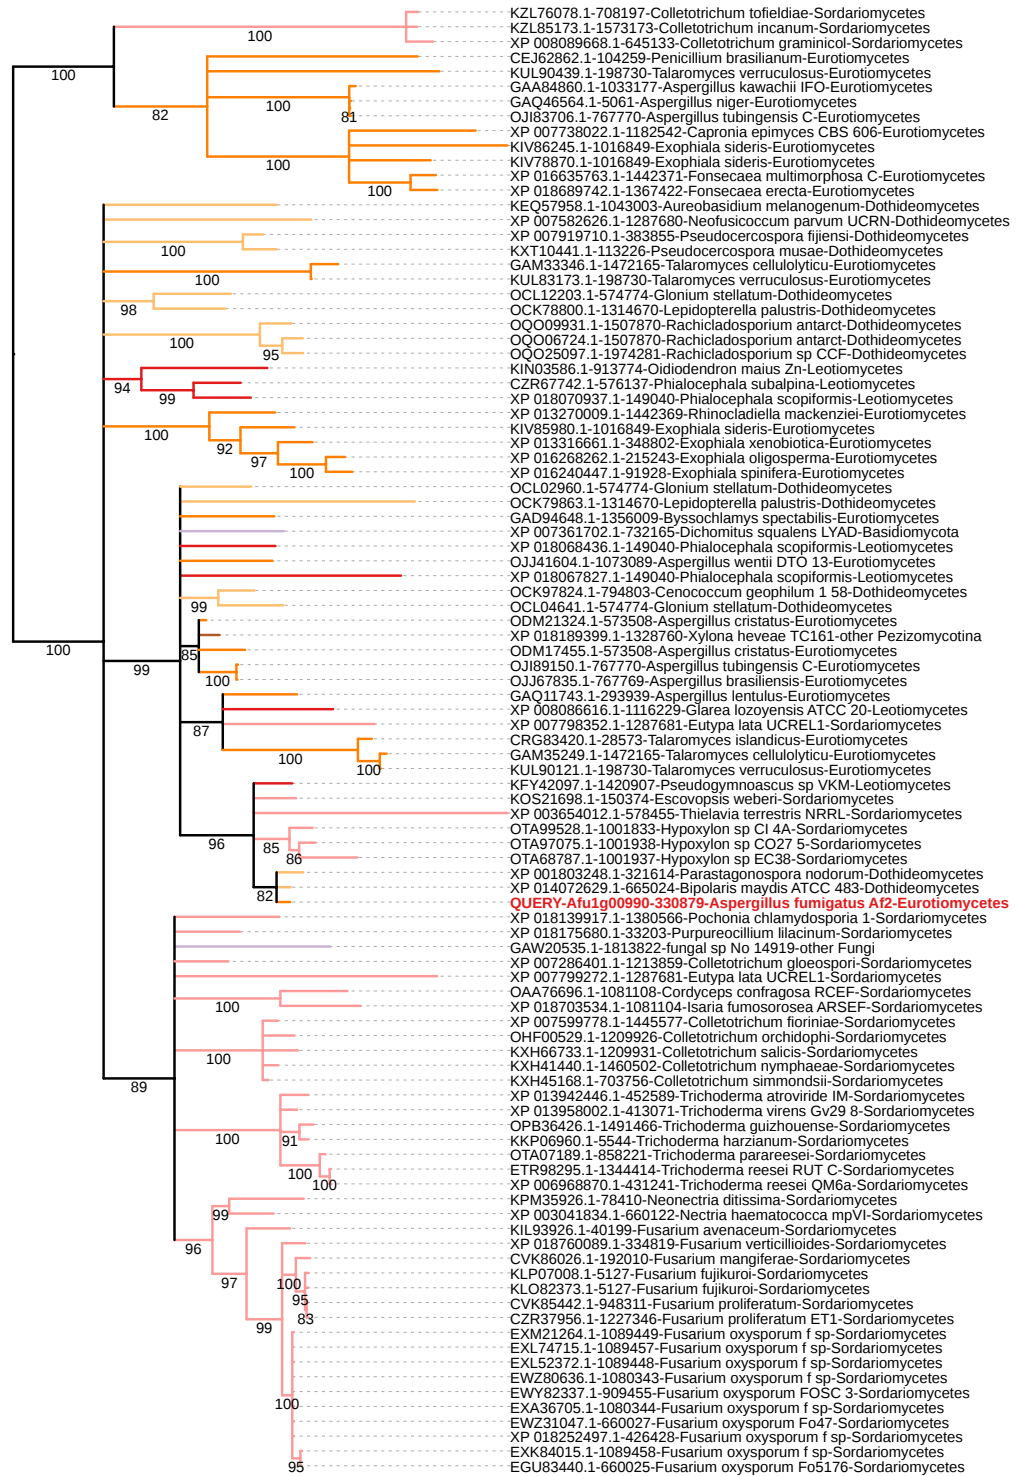

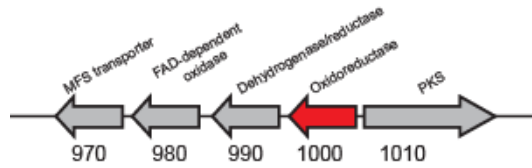

Tree scale: 0.1

**Taxonomy**

- █ Leotiomyces
- █ Sordariomycetes
- █ Eurotiomycetes
- █ Dothideomycetes
- █ other\_Pezizomycotina
- █ other\_Ascomycota
- █ other\_Fungi
- █ other\_Opisthokonta
- █ other\_Eukaryota
- █ Bacteria
- █ Archaea
- █ Viruses

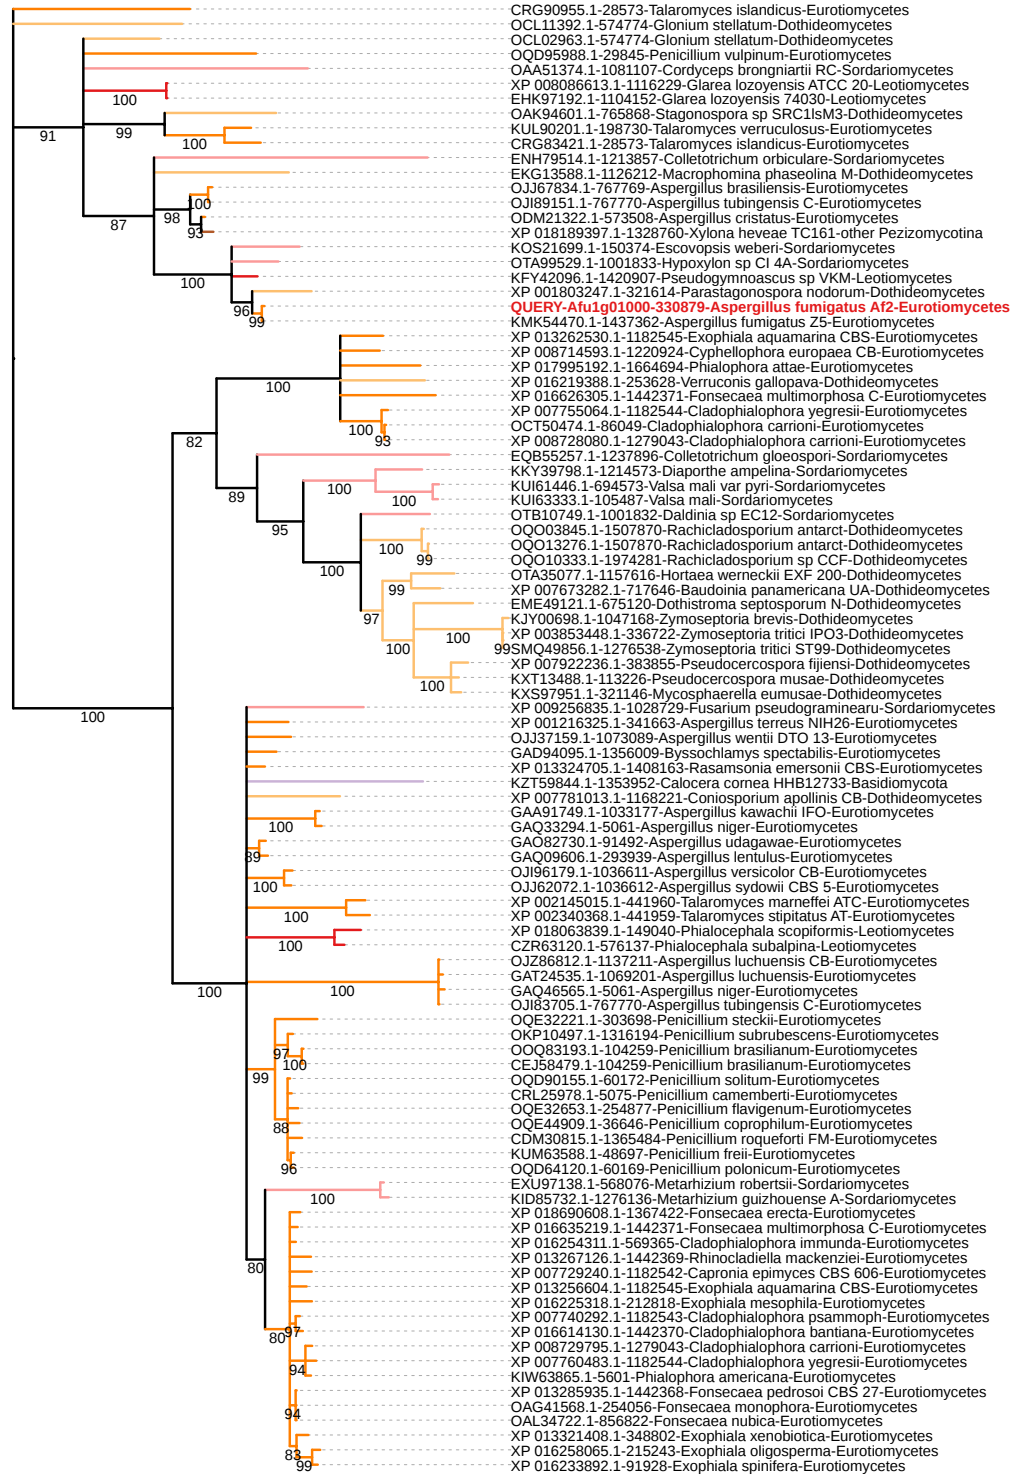

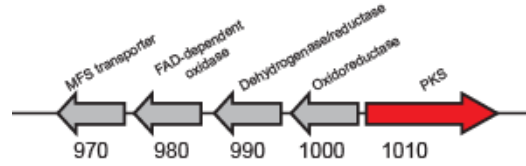

Tree scale: 0.1

**Taxonomy**

- Leotiomyces
- Sordariomycetes
- Eurotiomycetes
- Dothideomycetes
- other\_Pezizomycotina
- other\_Ascomycota
- other\_Fungi
- other\_Opisthokonta
- other\_Eukaryota
- Bacteria
- Archaea
- Viruses

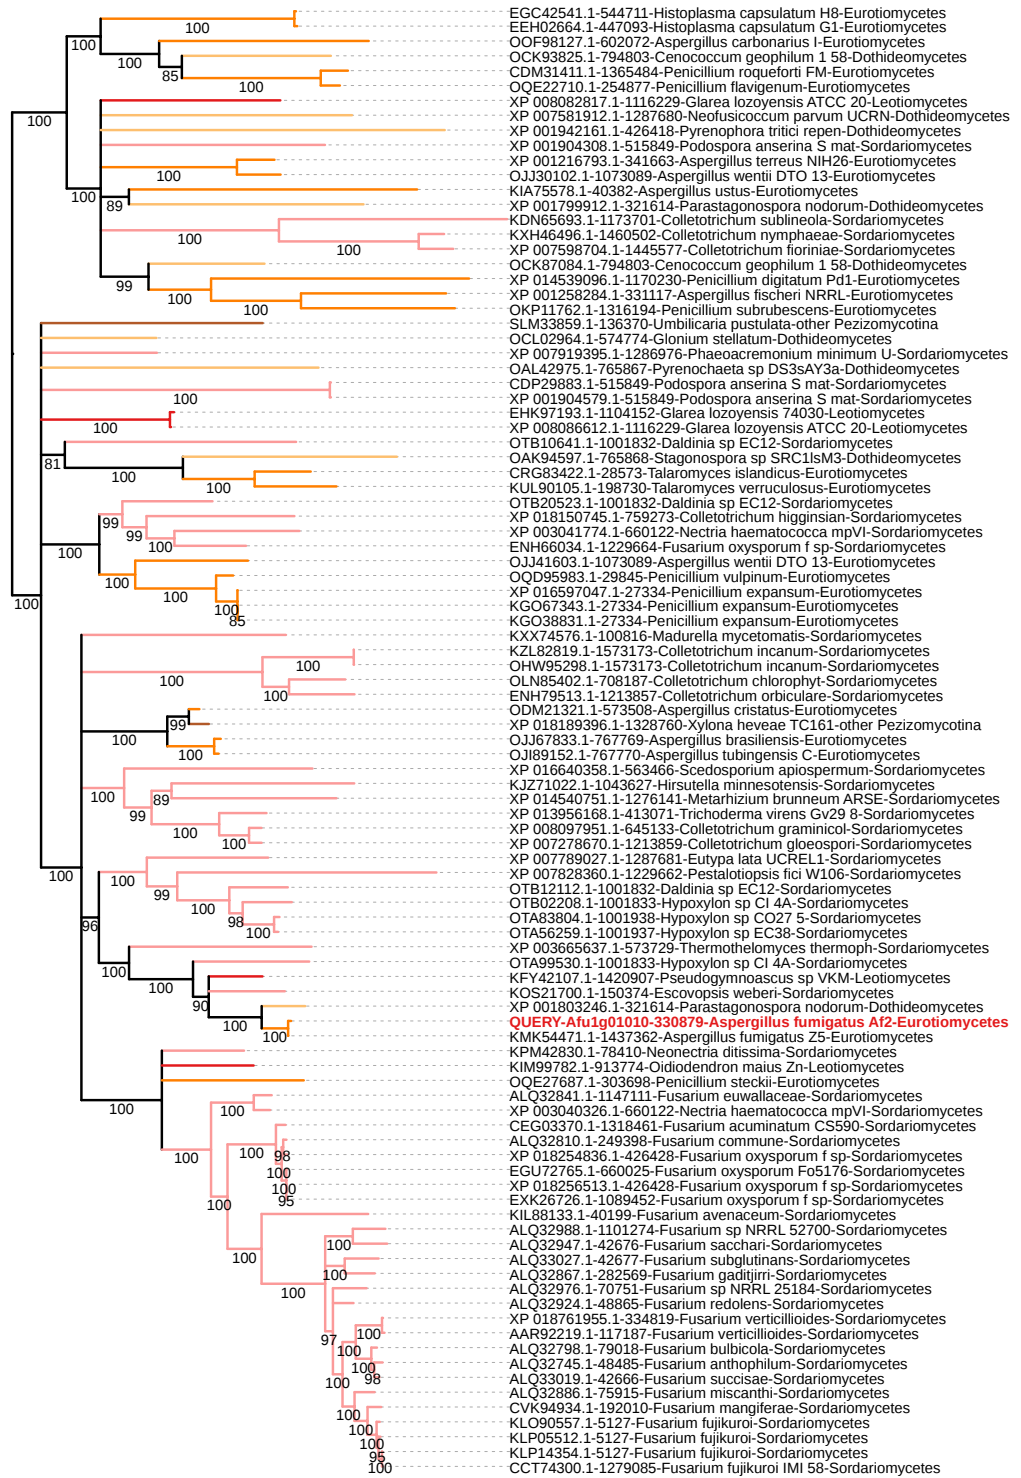

Supplement: pbio.2003583.s009.pdf [file pbio.2003583.s009.pdf]
