# Supplementary material for: Drivers of genetic diversity in secondary metabolic gene clusters within a fungal species
Source: PubMed Central journal article supplement (PMC5711037; doi:10.1371/journal.pbio.2003583), 2017-11-17

**A**

09-7500806

AFUT-1 LTR  
 Afu6098900 - C2H2 finger domain  
 Afu6099307 - chitinase  
 Afu6099317 - LysM domain  
 Afu6099330  
 Afu6099380  
 Afu6099395  
 AFUB \_092660  
 Afu6099400  
 Afu6099410  
 Afu6099420  
 Afu6099430  
 Afu6099440 - foliopolyglutamate synthase

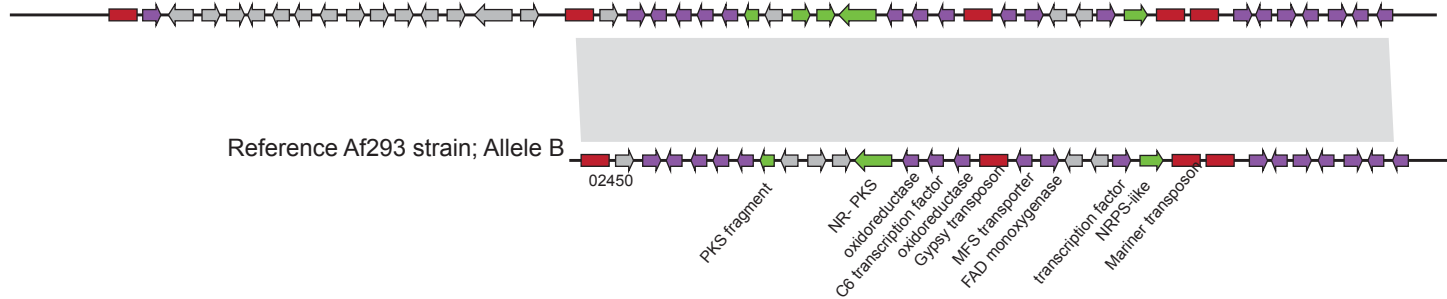**B**

F17582

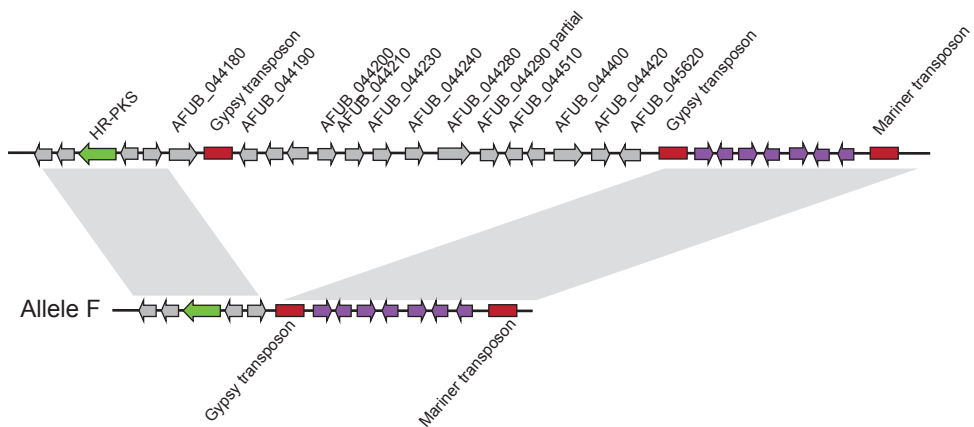

Supplement: pbio.2003583.s006.pdf [file pbio.2003583.s006.pdf]
