# Supplementary material for: Drivers of genetic diversity in secondary metabolic gene clusters within a fungal species
Source: PubMed Central journal article supplement (PMC5711037; doi:10.1371/journal.pbio.2003583), 2017-11-17

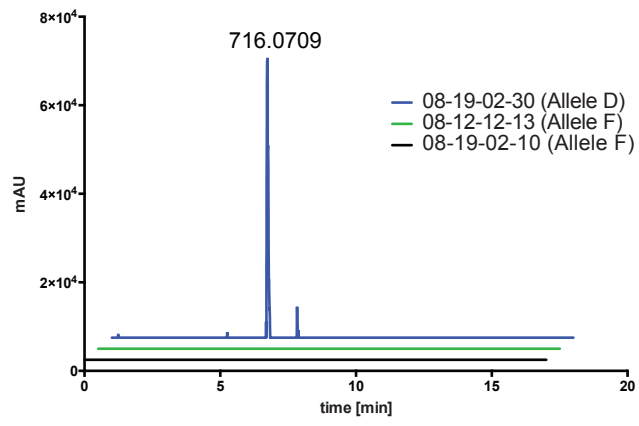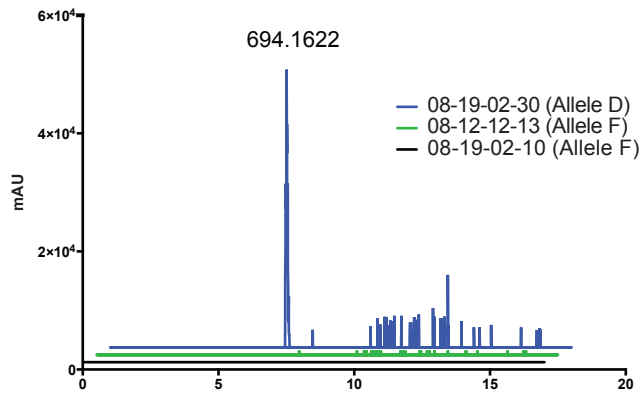

Supplement: pbio.2003583.s007.pdf [file pbio.2003583.s007.pdf]
