# Supplementary material for: Drivers of genetic diversity in secondary metabolic gene clusters within a fungal species
Source: PubMed Central journal article supplement (PMC5711037; doi:10.1371/journal.pbio.2003583), 2017-11-17

**A**

Aspergillus lentulus:  
GAQ05110.1- GAQ05072.1

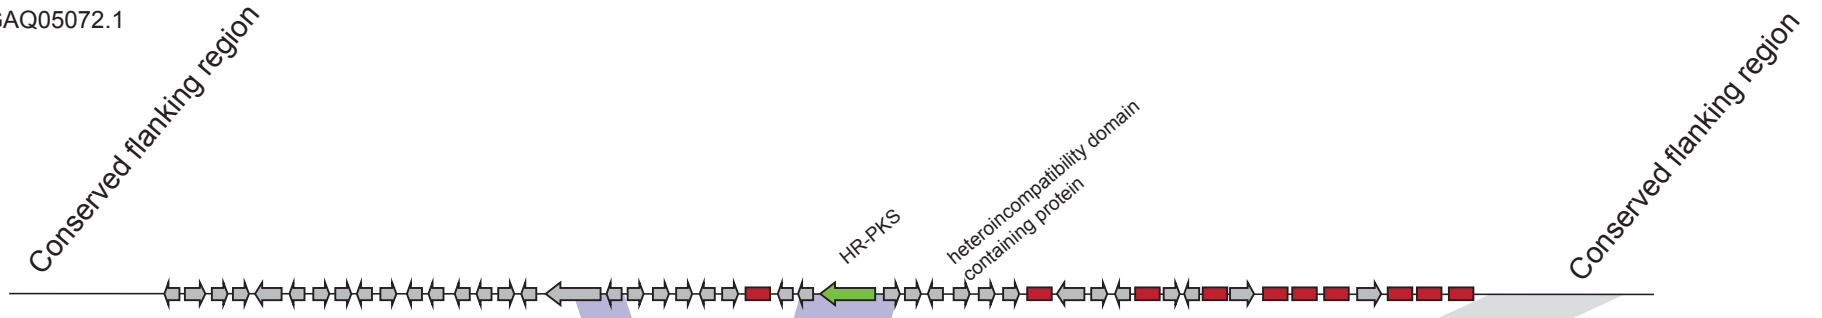**B**

Allele E;  
A1163 & 17 strains

Aspergillus fischeri:  
NFIA\_003580-NFIA\_004090

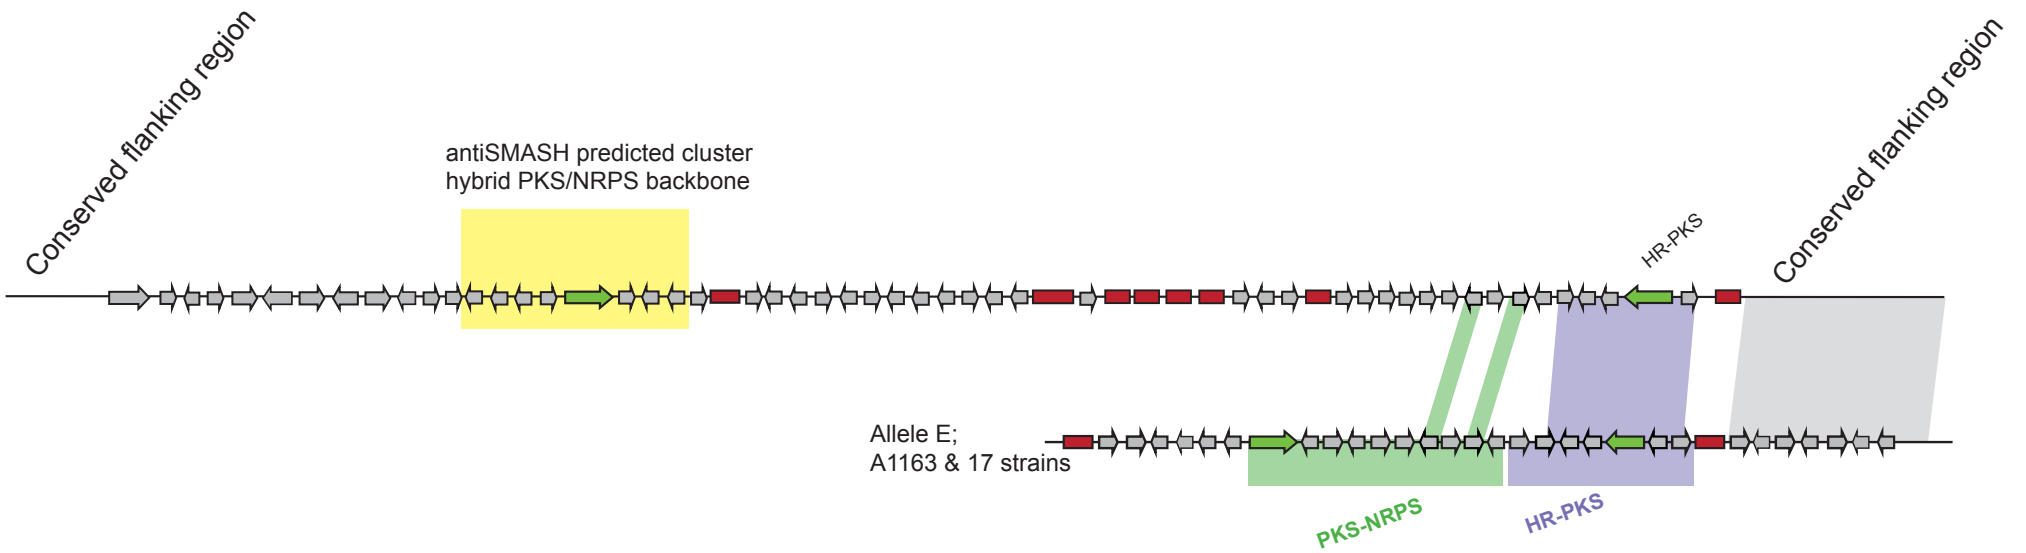

Supplement: pbio.2003583.s008.pdf [file pbio.2003583.s008.pdf]
