# Supplementary material for: Drivers of genetic diversity in secondary metabolic gene clusters within a fungal species
Source: PLoS Biol. 2017 Nov 17;15(11):e2003583. doi: 10.1371/journal.pbio.2003583 (PMC5711037; doi:10.1371/journal.pbio.2003583)
Supplement: S4 Table — (XLSX) [file pbio.2003583.s014.xlsx]

## Sheet: 08121213vs08190230pos
	name	fold	tstat	pvalue	mzmed	mzmin	mzmax	rtmed	rtmin	rtmax	npeaks	506	510	metlin	506_1_pos	506_2_pos	510_1_pos	510_2_pos
1	M667T371	2.98699	-305.182	2.25699e-05	666.717	666.717	666.717	371	370.957	371.157	4	2	2	http://metlin.scripps.edu/metabo_list.php?mass_min=665.57&mass_max=665.87	3.41674e+07	3.42569e+07	1.15134e+07	1.1394e+07
2	M564T347	45.7091	455.749	3.34097e-05	564.219	564.219	564.219	347.246	347.165	347.327	2	0	2	http://metlin.scripps.edu/metabo_list.php?mass_min=563.07&mass_max=563.37	102495	92560.3	4.44973e+06	4.46609e+06
3	M221T86	1.81102	-90.5484	0.000437849	221.005	220.984	221.019	85.5736	85.0962	86.1566	4	2	2	http://metlin.scripps.edu/metabo_list.php?mass_min=219.85&mass_max=220.15	8.67301e+06	8.60047e+06	4.74644e+06	4.79156e+06
4	M629T391	17.9557	-46.2127	0.000874166	628.728	628.728	628.728	391.317	391.317	391.317	1	1	0	http://metlin.scripps.edu/metabo_list.php?mass_min=627.58&mass_max=627.88	3.75082e+06	3.66302e+06	268176	144719
5	M568T885	1.05599	33.558	0.000886807	568.456	568.453	568.46	885.366	885.122	885.638	4	2	2	http://metlin.scripps.edu/metabo_list.php?mass_min=567.31&mass_max=567.61	2.63112e+06	2.63734e+06	2.77861e+06	2.78483e+06
6	M519T393	5.7639	36.3903	0.00100935	519.215	519.185	519.234	392.971	392.391	393.52	4	2	2	http://metlin.scripps.edu/metabo_list.php?mass_min=518.06&mass_max=518.36	5.70263e+06	4.84454e+06	2.98555e+07	3.09373e+07
7	M360T605	3.26776	-30.8947	0.00104629	360.221	360.217	360.225	604.95	604.728	605.172	2	2	0	http://metlin.scripps.edu/metabo_list.php?mass_min=359.07&mass_max=359.37	2.04796e+07	2.11385e+07	6.69959e+06	6.03638e+06
8	M397T431	9.13902	-33.042	0.00104832	397.195	397.195	397.195	431.242	431.242	431.242	1	1	0	http://metlin.scripps.edu/metabo_list.php?mass_min=396.04&mass_max=396.34	1.23578e+08	1.27981e+08	1.63408e+07	1.1185e+07
9	M451T371	2.2355	-36.727	0.00119055	451.14	451.139	451.141	371	370.957	371.157	4	2	2	http://metlin.scripps.edu/metabo_list.php?mass_min=449.99&mass_max=450.29	4.15384e+07	4.08024e+07	1.8915e+07	1.79182e+07
10	M748T263	2.56746	-31.9837	0.00123913	748.279	748.279	748.279	262.556	262.368	262.744	2	2	0	http://metlin.scripps.edu/metabo_list.php?mass_min=747.13&mass_max=747.43	1.48674e+06	1.53155e+06	605906	569693
11	M447T371	1.88861	-27.8882	0.00142605	447.347	447.347	447.347	371.229	371.157	371.3	2	2	0	http://metlin.scripps.edu/metabo_list.php?mass_min=446.2&mass_max=446.5	2.33735e+07	2.39771e+07	1.27975e+07	1.22742e+07
12	M221T585	7.79772	-84.4915	0.00151426	221.114	221.111	221.117	584.976	584.434	585.519	2	2	0	http://metlin.scripps.edu/metabo_list.php?mass_min=219.96&mass_max=220.26	4.97965e+06	5.07425e+06	665948	623391
13	M208T556	6.07218	-39.8142	0.00158499	208.107	208.102	208.11	555.564	555.423	556.037	4	2	2	http://metlin.scripps.edu/metabo_list.php?mass_min=206.96&mass_max=207.26	8.30033e+06	8.59902e+06	1.48706e+06	1.29602e+06
14	M375T497	10.6409	29.8111	0.00161725	375.187	375.187	375.188	497.445	496.391	497.952	3	1	2	http://metlin.scripps.edu/metabo_list.php?mass_min=374.04&mass_max=374.34	4.36562e+06	7.38986e+06	6.36965e+07	6.13928e+07
15	M617T445	46.3052	40.1981	0.00174305	617.329	617.329	617.33	444.937	444.855	445.019	2	0	2	http://metlin.scripps.edu/metabo_list.php?mass_min=616.18&mass_max=616.48	19910.3	77698.2	2.21308e+06	2.30669e+06
16	M321T265	9.49602	-23.9204	0.00178004	321.165	321.165	321.166	265.234	265.079	265.389	2	2	0	http://metlin.scripps.edu/metabo_list.php?mass_min=320.02&mass_max=320.32	2.49541e+07	2.37093e+07	3.22627e+06	1.89834e+06
17	M615T818	1.14987	49.0711	0.00178157	615.417	615.415	615.417	817.771	817.05	817.973	4	2	2	http://metlin.scripps.edu/metabo_list.php?mass_min=614.27&mass_max=614.57	2.54104e+06	2.5275e+06	2.91782e+06	2.91032e+06
18	M344T265	10.6295	-24.0085	0.00180879	344.241	344.239	344.243	264.984	264.733	265.389	4	2	2	http://metlin.scripps.edu/metabo_list.php?mass_min=343.09&mass_max=343.39	3.33275e+07	3.15178e+07	3.87369e+06	2.22683e+06
19	M726T497	38.2684	37.0974	0.00187205	726.381	726.381	726.381	497.227	497.131	497.322	2	0	2	http://metlin.scripps.edu/metabo_list.php?mass_min=725.23&mass_max=725.53	849920	2.8095e+06	7.15752e+07	6.84648e+07
20	M576T472	3.78582	-61.1246	0.00213176	576.322	576.313	576.33	472.202	471.971	472.434	2	2	0	http://metlin.scripps.edu/metabo_list.php?mass_min=575.17&mass_max=575.47	3.88219e+06	3.92201e+06	988167	1.07326e+06
21	M839T368	5.36127	-21.7401	0.00215762	839.365	839.364	839.365	367.628	367.541	367.715	2	2	0	http://metlin.scripps.edu/metabo_list.php?mass_min=838.21&mass_max=838.51	6.92918e+06	7.31887e+06	1.51071e+06	1.14688e+06
22	M210T682	1.99605	-21.5336	0.00217375	210.107	210.096	210.135	682.337	681.86	682.82	4	2	2	http://metlin.scripps.edu/metabo_list.php?mass_min=208.96&mass_max=209.26	1.22977e+07	1.26973e+07	6.05144e+06	6.47074e+06
23	M439T433	3.27388	-21.3332	0.00241539	439.124	439.118	439.126	432.861	431.551	433.194	3	2	1	http://metlin.scripps.edu/metabo_list.php?mass_min=437.97&mass_max=438.27	1.5935e+06	1.66287e+06	537412	457237
24	M470T372	1.6435	-24.1492	0.00241637	470.121	470.12	470.121	371.626	371.583	371.781	4	2	2	http://metlin.scripps.edu/metabo_list.php?mass_min=468.97&mass_max=469.27	2.19768e+07	2.25519e+07	1.37651e+07	1.33287e+07
25	M613T662	9.75166	42.1242	0.00242511	613.284	613.283	613.284	661.656	661.439	661.873	2	0	2	http://metlin.scripps.edu/metabo_list.php?mass_min=612.13&mass_max=612.43	130310	158903	1.38373e+06	1.43658e+06
26	M901T371	1.69508	-117.972	0.00251931	901.28	901.278	901.282	371.469	371.27	372.094	4	2	2	http://metlin.scripps.edu/metabo_list.php?mass_min=900.13&mass_max=900.43	2.90725e+07	2.88791e+07	1.71223e+07	1.70659e+07
27	M1316T371	1.91041	-27.3303	0.00252326	1316.46	1316.46	1316.46	371.27	371.27	371.27	1	0	1	http://metlin.scripps.edu/metabo_list.php?mass_min=1315.31&mass_max=1315.61	1.77576e+07	1.74122e+07	9.4581e+06	8.95137e+06
28	M371T93	3.62943	-25.2641	0.00252331	371	370.999	371.001	92.6482	92.4974	92.7989	2	2	0	http://metlin.scripps.edu/metabo_list.php?mass_min=369.85&mass_max=370.15	714087	738412	183195	217006
29	M738T274	5.36193	-48.5421	0.00252553	738.298	738.298	738.298	273.696	273.696	273.696	1	1	0	http://metlin.scripps.edu/metabo_list.php?mass_min=737.15&mass_max=737.45	3.71798e+06	3.66304e+06	743692	632868
30	M266T350	5.99774	-25.0761	0.00260771	266.139	266.139	266.139	349.621	349.621	349.621	1	1	0	http://metlin.scripps.edu/metabo_list.php?mass_min=264.99&mass_max=265.29	4.70391e+06	4.52572e+06	894236	644616
31	M434T523	4.02218	35.6312	0.00272901	434.139	434.138	434.139	522.702	522.382	523.022	4	2	2	http://metlin.scripps.edu/metabo_list.php?mass_min=432.99&mass_max=433.29	1.10196e+06	1.27744e+06	4.83501e+06	4.73533e+06
32	M754T501	11.6749	18.9907	0.00277267	754.375	754.375	754.375	501.321	501.22	501.422	2	0	2	http://metlin.scripps.edu/metabo_list.php?mass_min=753.23&mass_max=753.53	666428	1.56756e+06	1.34781e+07	1.26035e+07
33	M374T497	10.0026	33.2245	0.00281413	374.184	374.183	374.184	497.445	496.712	497.952	3	1	2	http://metlin.scripps.edu/metabo_list.php?mass_min=373.03&mass_max=373.33	2.10657e+07	3.39343e+07	2.7883e+08	2.71314e+08
34	M725T497	36.8944	33.6696	0.00281605	725.378	725.377	725.378	497.227	497.131	497.322	2	0	2	http://metlin.scripps.edu/metabo_list.php?mass_min=724.23&mass_max=724.53	1.83646e+06	6.05623e+06	1.49238e+08	1.41958e+08
35	M491T434	2.74843	-20.1043	0.00286017	491.239	491.239	491.239	433.569	433.508	433.872	4	2	2	http://metlin.scripps.edu/metabo_list.php?mass_min=490.09&mass_max=490.39	2.8261e+07	2.69197e+07	1.05975e+07	9.47968e+06
36	M260T711	5.44263	20.438	0.00299276	260.201	260.2	260.201	710.817	710.767	710.866	2	0	2	http://metlin.scripps.edu/metabo_list.php?mass_min=259.05&mass_max=259.35	263483	371429	1.77079e+06	1.6848e+06
37	M668T371	3.01035	-133.125	0.00313367	667.72	667.72	667.72	371	370.957	371.157	4	2	2	http://metlin.scripps.edu/metabo_list.php?mass_min=666.57&mass_max=666.87	1.12579e+07	1.1148e+07	3.73318e+06	3.70977e+06
38	M831T659	4.43524	-43.1505	0.00313422	830.576	830.575	830.576	658.567	658.447	658.687	2	2	0	http://metlin.scripps.edu/metabo_list.php?mass_min=829.43&mass_max=829.73	988669	1.02109e+06	234475	218659
39	M1242T391	5.58552	-18.8308	0.00318362	1242.49	1242.49	1242.49	391.317	391.317	391.317	1	1	0	http://metlin.scripps.edu/metabo_list.php?mass_min=1241.34&mass_max=1241.64	1.46094e+07	1.36675e+07	2.92892e+06	2.13362e+06
40	M888T371	1.67582	-18.5143	0.00322846	888.313	888.313	888.313	371.469	371.27	371.781	4	2	2	http://metlin.scripps.edu/metabo_list.php?mass_min=887.16&mass_max=887.46	5.27307e+07	5.12577e+07	3.18865e+07	3.01658e+07
41	M917T371	2.42058	-47.6461	0.00341205	917.239	917.238	917.24	371.155	370.957	371.469	4	2	2	http://metlin.scripps.edu/metabo_list.php?mass_min=916.09&mass_max=916.39	1.86651e+07	1.84785e+07	7.88133e+06	7.46361e+06
42	M702T413	7.95488	-25.7008	0.00344993	702.326	702.322	702.33	412.753	412.507	413	2	2	0	http://metlin.scripps.edu/metabo_list.php?mass_min=701.18&mass_max=701.48	3.66913e+06	3.80489e+06	577261	362289
43	M287T594	7.04282	-56.6655	0.00346045	287.127	287.127	287.127	594.152	594.085	594.219	2	2	0	http://metlin.scripps.edu/metabo_list.php?mass_min=285.98&mass_max=286.28	1.99883e+07	1.97641e+07	3.10149e+06	2.5429e+06
44	M918T371	2.62924	-60.4637	0.00346849	918.244	918.244	918.245	371.385	371.3	371.469	2	2	0	http://metlin.scripps.edu/metabo_list.php?mass_min=917.09&mass_max=917.39	6.75703e+06	6.80703e+06	2.64432e+06	2.51461e+06
45	M532T317	1.97674	-17.4056	0.00349186	532.088	532.087	532.088	317.078	316.861	317.243	4	2	2	http://metlin.scripps.edu/metabo_list.php?mass_min=530.94&mass_max=531.24	3.82297e+06	3.9888e+06	2.04954e+06	1.9023e+06
46	M902T371	1.68377	-29.4773	0.00352488	902.289	902.287	902.292	371	370.957	371.157	4	2	2	http://metlin.scripps.edu/metabo_list.php?mass_min=901.14&mass_max=901.44	1.48426e+07	1.46395e+07	8.93067e+06	8.57891e+06
47	M728T497	62.9244	46.1658	0.00353159	728.385	728.385	728.385	497.069	497.007	497.131	2	0	2	http://metlin.scripps.edu/metabo_list.php?mass_min=727.24&mass_max=727.54	21160.6	72649.5	3.00888e+06	2.89406e+06
48	M492T556	7.11457	-17.6242	0.00357757	492.213	492.213	492.213	556.082	555.275	556.758	4	2	2	http://metlin.scripps.edu/metabo_list.php?mass_min=491.06&mass_max=491.36	4.55748e+07	4.85508e+07	8.36228e+06	4.86771e+06
49	M209T370	2.39459	-17.7103	0.00362075	209.076	209.074	209.079	370.457	369.703	370.988	4	2	2	http://metlin.scripps.edu/metabo_list.php?mass_min=207.93&mass_max=208.23	8.92065e+06	9.38186e+06	4.01498e+06	3.62828e+06
50	M1317T371	1.87445	-19.5478	0.00381778	1317.47	1317.47	1317.47	371.27	371.27	371.27	1	0	1	http://metlin.scripps.edu/metabo_list.php?mass_min=1316.32&mass_max=1316.62	1.31455e+07	1.26497e+07	6.69827e+06	7.06319e+06
51	M469T610	19.7766	50.1776	0.00382454	469.138	469.138	469.138	609.947	609.918	609.976	2	0	2	http://metlin.scripps.edu/metabo_list.php?mass_min=467.99&mass_max=468.29	78303.1	58738.8	1.37881e+06	1.33141e+06
52	M462T658	5.74584	-19.484	0.00393904	462.112	462.105	462.119	657.616	657.42	657.811	2	2	0	http://metlin.scripps.edu/metabo_list.php?mass_min=460.96&mass_max=461.26	1.5008e+06	1.60734e+06	309228	231708
53	M432T370	3.23588	-18.0354	0.00414936	432.164	432.163	432.164	370.277	369.427	371.011	4	2	2	http://metlin.scripps.edu/metabo_list.php?mass_min=431.01&mass_max=431.31	2.86568e+08	2.69599e+08	9.23813e+07	7.94938e+07
54	M730T317	1.42656	-25.7174	0.00423023	730.267	730.267	730.267	317.215	316.957	317.515	4	2	2	http://metlin.scripps.edu/metabo_list.php?mass_min=729.12&mass_max=729.42	9.22754e+06	9.04418e+06	6.3505e+06	6.45778e+06
55	M687T346	8.05644	-19.6232	0.00423725	687.273	687.272	687.275	345.94	345.902	346.197	3	2	1	http://metlin.scripps.edu/metabo_list.php?mass_min=686.12&mass_max=686.42	6.61002e+06	7.11162e+06	1.02731e+06	675879
56	M229T556	3.94578	-56.2224	0.00426476	229.094	229.093	229.095	556.114	556.087	556.14	2	2	0	http://metlin.scripps.edu/metabo_list.php?mass_min=227.94&mass_max=228.24	4.86206e+06	4.81813e+06	1.28705e+06	1.16625e+06
57	M1088T371	5.53729	-34.4287	0.00431273	1088.39	1088.39	1088.39	371.229	371.157	371.3	2	2	0	http://metlin.scripps.edu/metabo_list.php?mass_min=1087.24&mass_max=1087.54	6.75825e+06	6.90115e+06	1.3794e+06	1.0874e+06
58	M817T331	4.92517	-17.8227	0.00433157	817.348	817.345	817.351	330.845	330.681	331.008	2	2	0	http://metlin.scripps.edu/metabo_list.php?mass_min=816.2&mass_max=816.5	8.19994e+06	8.65269e+06	2.01208e+06	1.40966e+06
59	M610T491	4.7379	-18.3595	0.00440402	610.304	610.303	610.305	490.852	490.682	491.023	2	2	0	http://metlin.scripps.edu/metabo_list.php?mass_min=609.15&mass_max=609.45	2.45327e+06	2.28842e+06	560278	440520
60	M478T371	1.51239	-47.0606	0.00440511	478.226	478.226	478.226	371.385	371.27	371.64	4	2	2	http://metlin.scripps.edu/metabo_list.php?mass_min=477.08&mass_max=477.38	2.98497e+07	2.94536e+07	1.96855e+07	1.95262e+07
61	M1240T392	5.53029	-15.0794	0.00441501	1240.48	1240.48	1240.48	391.539	391.317	391.762	2	2	0	http://metlin.scripps.edu/metabo_list.php?mass_min=1239.33&mass_max=1239.63	4.72465e+07	4.36673e+07	9.92118e+06	6.51807e+06
62	M477T371	1.48924	-63.2051	0.00451747	477.223	477.222	477.223	371.369	370.988	371.64	4	2	2	http://metlin.scripps.edu/metabo_list.php?mass_min=476.07&mass_max=476.37	1.09609e+08	1.09959e+08	7.42611e+07	7.31751e+07
63	M264T139	5.89225	-54.4286	0.00453484	264.086	264.086	264.086	139.437	139.22	139.654	2	2	0	http://metlin.scripps.edu/metabo_list.php?mass_min=262.94&mass_max=263.24	2.20281e+06	2.26698e+06	390830	367758
64	M569T389	3.19632	-16.5512	0.004614	569.257	569.257	569.257	388.871	388.806	388.937	2	2	0	http://metlin.scripps.edu/metabo_list.php?mass_min=568.11&mass_max=568.41	9.3745e+06	8.90706e+06	3.15876e+06	2.5608e+06
65	M372T836	2.841	-97.8522	0.00472233	372.224	372.224	372.224	836.26	836.101	836.419	2	2	0	http://metlin.scripps.edu/metabo_list.php?mass_min=371.07&mass_max=371.37	3.62274e+06	3.67017e+06	1.28805e+06	1.27896e+06
66	M249T230	6.94758	-18.4727	0.00481167	249.149	249.149	249.149	229.847	226.94	232.754	2	2	0	http://metlin.scripps.edu/metabo_list.php?mass_min=248&mass_max=248.3	9.4586e+07	1.02071e+08	1.67527e+07	1.15532e+07
67	M778T429	90.5347	-47.0082	0.00492285	778.288	778.288	778.288	429.272	429.272	429.272	1	1	0	http://metlin.scripps.edu/metabo_list.php?mass_min=777.14&mass_max=777.44	601225	625343	11361.1	2186.96
68	M357T371	2.65471	-15.0125	0.00495824	357.109	357.109	357.109	371	370.957	371.157	4	2	2	http://metlin.scripps.edu/metabo_list.php?mass_min=355.96&mass_max=356.26	1.23122e+08	1.31202e+08	5.12997e+07	4.45013e+07
69	M433T370	3.25859	-16.6962	0.00510845	433.167	433.167	433.168	370.277	369.114	371.011	4	2	2	http://metlin.scripps.edu/metabo_list.php?mass_min=432.02&mass_max=432.32	7.02085e+07	6.56637e+07	2.25187e+07	1.91779e+07
70	M219T603	5.10149	-40.7715	0.00520309	219.105	219.104	219.105	602.916	602.684	603.149	2	2	0	http://metlin.scripps.edu/metabo_list.php?mass_min=217.95&mass_max=218.25	9.60238e+06	9.46085e+06	2.04252e+06	1.69427e+06
71	M300T275	1.21486	13.7599	0.00529924	299.608	299.608	299.608	274.879	274.879	274.879	1	0	1	http://metlin.scripps.edu/metabo_list.php?mass_min=298.46&mass_max=298.76	939480	919509	1.13974e+06	1.11867e+06
72	M629T536	3.30383	19.3366	0.00543037	629.293	629.293	629.293	536.131	536.131	536.131	1	0	1	http://metlin.scripps.edu/metabo_list.php?mass_min=628.14&mass_max=628.44	837291	736421	2.67866e+06	2.52061e+06
73	M883T369	3.01955	-14.0244	0.00550263	883.353	883.352	883.355	368.711	368.174	369.125	4	2	2	http://metlin.scripps.edu/metabo_list.php?mass_min=882.2&mass_max=882.5	7.75658e+07	8.33829e+07	2.9155e+07	2.41473e+07
74	M249T638	3.8526	-14.2496	0.00572729	249.165	249.149	249.168	637.91	636.883	638.905	4	2	2	http://metlin.scripps.edu/metabo_list.php?mass_min=248.01&mass_max=248.31	1.506e+08	1.60823e+08	4.66892e+07	3.41454e+07
75	M472T263	2.75328	-15.2668	0.00593598	472.158	472.158	472.158	262.889	262.701	263.076	2	2	0	http://metlin.scripps.edu/metabo_list.php?mass_min=471.01&mass_max=471.31	4.24201e+07	4.53631e+07	1.70307e+07	1.48524e+07
76	M413T324	6.87552	13.299	0.00600576	413.255	413.254	413.255	323.719	323.377	324.061	2	0	2	http://metlin.scripps.edu/metabo_list.php?mass_min=412.1&mass_max=412.4	806890	443408	4.5062e+06	4.09025e+06
77	M410T410	3.9143	-14.445	0.00605072	410.171	410.171	410.171	410.368	410.207	410.85	4	2	2	http://metlin.scripps.edu/metabo_list.php?mass_min=409.02&mass_max=409.32	6.92264e+08	6.38059e+08	1.90927e+08	1.48936e+08
78	M772T393	191.156	97.2462	0.00616363	772.28	772.28	772.28	393.13	392.958	393.303	2	0	2	http://metlin.scripps.edu/metabo_list.php?mass_min=771.13&mass_max=771.43	48181.1	34775.9	8.0097e+06	7.84804e+06
79	M647T869	1.03145	-12.6444	0.00619712	647.325	647.325	647.325	869.057	869.057	869.057	1	0	1	http://metlin.scripps.edu/metabo_list.php?mass_min=646.18&mass_max=646.48	3.09014e+06	3.10067e+06	2.99572e+06	3.0063e+06
80	M403T360	16.959	18.4994	0.00622119	403.14	403.14	403.14	359.755	359.743	359.767	2	0	2	http://metlin.scripps.edu/metabo_list.php?mass_min=401.99&mass_max=402.29	135003	361011	4.38764e+06	4.0243e+06
81	M493T555	7.30549	-18.1925	0.00634273	493.217	493.217	493.218	555.396	554.589	556.087	4	2	2	http://metlin.scripps.edu/metabo_list.php?mass_min=492.07&mass_max=492.37	1.431e+07	1.50475e+07	2.60002e+06	1.41853e+06
82	M411T410	3.97459	-14.1832	0.00639308	411.174	411.173	411.174	410.273	410.07	410.85	4	2	2	http://metlin.scripps.edu/metabo_list.php?mass_min=410.02&mass_max=410.32	1.74219e+08	1.60206e+08	4.74329e+07	3.67077e+07
83	M896T316	7.40001	-14.3985	0.00661784	896.342	896.342	896.342	315.982	315.982	315.982	1	1	0	http://metlin.scripps.edu/metabo_list.php?mass_min=895.19&mass_max=895.49	2.02001e+06	2.16965e+06	384253	181917
84	M1241T392	5.7773	-13.9678	0.00665484	1241.49	1241.49	1241.49	391.539	391.317	391.762	2	2	0	http://metlin.scripps.edu/metabo_list.php?mass_min=1240.34&mass_max=1240.64	3.59858e+07	3.27466e+07	7.17981e+06	4.71715e+06
85	M240T372	2.54951	-15.6599	0.00672651	240.067	240.066	240.068	371.755	371.469	371.955	4	2	2	http://metlin.scripps.edu/metabo_list.php?mass_min=238.92&mass_max=239.22	7.43679e+06	7.92967e+06	3.18149e+06	2.84572e+06
86	M848T393	5.3516	-13.6372	0.00681849	848.319	848.319	848.319	392.621	392.319	393.022	4	2	2	http://metlin.scripps.edu/metabo_list.php?mass_min=847.17&mass_max=847.47	4.57352e+07	4.16073e+07	9.74805e+06	6.57278e+06
87	M393T396	3.42652	-12.213	0.00681856	393.165	393.164	393.165	396.489	395.569	396.583	4	2	2	http://metlin.scripps.edu/metabo_list.php?mass_min=392.01&mass_max=392.31	4.41732e+07	4.05542e+07	1.40247e+07	1.07022e+07
88	M568T748	9.24333	-13.0411	0.00695048	568.227	568.227	568.227	748.208	748.208	748.208	1	1	0	http://metlin.scripps.edu/metabo_list.php?mass_min=567.08&mass_max=567.38	1.11884e+06	1.245e+06	178405	77329.6
89	M682T340	1.38736	-11.8916	0.00705536	682.24	682.181	682.299	340.072	331.335	347.655	4	2	2	http://metlin.scripps.edu/metabo_list.php?mass_min=681.09&mass_max=681.39	1.45888e+06	1.41013e+06	1.05723e+06	1.01074e+06
90	M207T556	6.12109	-27.4308	0.00726114	207.103	207.102	207.105	555.724	555.481	555.991	4	2	2	http://metlin.scripps.edu/metabo_list.php?mass_min=205.95&mass_max=206.25	5.83159e+07	6.16545e+07	1.05485e+07	9.051e+06
91	M701T332	5.66574	-13.6645	0.00728151	701.323	701.323	701.323	331.665	331.665	331.665	1	1	0	http://metlin.scripps.edu/metabo_list.php?mass_min=700.17&mass_max=700.47	1.81906e+06	1.65093e+06	368402	244048
92	M513T564	5.63613	-15.4796	0.0072868	513.229	513.227	513.23	563.776	563.603	563.95	2	2	0	http://metlin.scripps.edu/metabo_list.php?mass_min=512.08&mass_max=512.38	1.07823e+07	1.14344e+07	2.46297e+06	1.47886e+06
93	M345T535	1.58031	-12.2545	0.0073585	345.163	345.159	345.166	535.103	535.049	535.156	2	2	0	http://metlin.scripps.edu/metabo_list.php?mass_min=344.01&mass_max=344.31	3.12644e+06	3.24924e+06	2.0904e+06	1.94404e+06
94	M727T497	28.8802	21.6152	0.00739945	727.383	727.383	727.383	497.227	497.131	497.322	2	0	2	http://metlin.scripps.edu/metabo_list.php?mass_min=726.23&mass_max=726.53	250971	989927	1.86285e+07	1.72088e+07
95	M547T820	3.64156	-13.0273	0.00749634	546.865	546.865	546.865	819.744	819.611	819.878	2	2	0	http://metlin.scripps.edu/metabo_list.php?mass_min=545.72&mass_max=546.02	2.66695e+06	2.8537e+06	880094	635917
96	M531T317	2.12079	-11.7291	0.0076153	531.082	531.082	531.085	317.398	317.187	317.559	4	2	2	http://metlin.scripps.edu/metabo_list.php?mass_min=529.93&mass_max=530.23	7.8292e+06	8.37719e+06	4.06214e+06	3.57953e+06
97	M457T494	8.63123	-26.158	0.00765466	457.18	457.125	457.237	493.701	490.37	496.817	4	2	2	http://metlin.scripps.edu/metabo_list.php?mass_min=456.03&mass_max=456.33	1.2387e+07	1.16466e+07	1.55936e+06	1.22513e+06
98	M435T523	2.78148	21.4335	0.0076929	435.131	435.13	435.131	523.481	523.296	523.666	2	0	2	http://metlin.scripps.edu/metabo_list.php?mass_min=433.98&mass_max=434.28	399642	463431	1.21672e+06	1.1839e+06
99	M455T372	1.65091	-15.605	0.00782276	455.15	455.15	455.15	372.024	371.897	372.237	4	2	2	http://metlin.scripps.edu/metabo_list.php?mass_min=454&mass_max=454.3	1.28903e+08	1.32453e+08	8.19389e+07	7.63709e+07
100	M220T603	5.91848	-41.9795	0.00785131	220.107	220.107	220.107	602.916	602.684	603.149	2	2	0	http://metlin.scripps.edu/metabo_list.php?mass_min=218.96&mass_max=219.26	1.28896e+06	1.30411e+06	243590	194541
101	M696T635	5.48073	14.3776	0.00785139	696.264	696.264	696.264	635.461	635.461	635.461	1	0	1	http://metlin.scripps.edu/metabo_list.php?mass_min=695.11&mass_max=695.41	240938	408272	1.83594e+06	1.72221e+06
102	M785T396	7.85775	-11.267	0.00786746	785.329	785.329	785.329	395.506	395.433	395.579	2	2	0	http://metlin.scripps.edu/metabo_list.php?mass_min=784.18&mass_max=784.48	4.45914e+06	4.99058e+06	852972	349628
103	M361T604	3.24107	-19.533	0.00789095	361.224	361.22	361.229	604.105	604.048	604.162	2	2	0	http://metlin.scripps.edu/metabo_list.php?mass_min=360.07&mass_max=360.37	4.31495e+06	4.59223e+06	1.44917e+06	1.29905e+06
104	M259T621	4.70088	16.1887	0.00793338	259.163	259.163	259.164	621.261	621.246	621.276	2	0	2	http://metlin.scripps.edu/metabo_list.php?mass_min=258.01&mass_max=258.31	6.06686e+06	8.99896e+06	3.63148e+07	3.45078e+07
105	M826T371	4.72121	-13.4382	0.00804207	826.336	826.334	826.337	371.314	370.532	371.897	4	2	2	http://metlin.scripps.edu/metabo_list.php?mass_min=825.19&mass_max=825.49	2.06892e+07	1.93266e+07	5.19341e+06	3.28235e+06
106	M392T330	3.29108	-12.3481	0.00823329	392.169	392.16	392.184	330.175	329.684	330.686	4	2	2	http://metlin.scripps.edu/metabo_list.php?mass_min=391.02&mass_max=391.32	7.21112e+07	6.73252e+07	2.43021e+07	1.80659e+07
107	M322T567	5.55548	-16.7013	0.00830149	322.119	322.119	322.119	567.46	567.331	567.589	2	2	0	http://metlin.scripps.edu/metabo_list.php?mass_min=320.97&mass_max=321.27	2.70548e+07	2.844e+07	6.16775e+06	3.82145e+06
108	M345T265	9.40622	-26.5509	0.00831297	345.244	345.244	345.244	265.234	265.079	265.389	2	2	0	http://metlin.scripps.edu/metabo_list.php?mass_min=344.09&mass_max=344.39	6.63551e+06	6.46184e+06	898808	493606
109	M496T393	42.8454	25.4269	0.0083424	496.158	496.106	496.158	392.958	390.819	393.303	3	1	2	http://metlin.scripps.edu/metabo_list.php?mass_min=495.01&mass_max=495.31	1.08927e+06	5.39557e+06	1.43805e+08	1.3404e+08
110	M376T489	1.8542	-14.2363	0.00834766	376.166	376.165	376.167	489.114	488.944	489.461	4	2	2	http://metlin.scripps.edu/metabo_list.php?mass_min=375.02&mass_max=375.32	1.96119e+08	2.03279e+08	1.13081e+08	1.02321e+08
111	M289T231	4.03417	-10.958	0.00840051	289.141	289.141	289.141	230.539	230.406	230.671	2	2	0	http://metlin.scripps.edu/metabo_list.php?mass_min=287.99&mass_max=288.29	2.1616e+07	1.95423e+07	6.06041e+06	4.14203e+06
112	M577T472	8.65832	-22.8334	0.00856409	577.336	577.332	577.34	472.367	472.106	472.628	2	2	0	http://metlin.scripps.edu/metabo_list.php?mass_min=576.19&mass_max=576.49	978272	1.04939e+06	100418	133768
113	M929T502	4.54889	-15.6622	0.00857225	929.398	929.396	929.399	502.341	502.253	502.428	2	2	0	http://metlin.scripps.edu/metabo_list.php?mass_min=928.25&mass_max=928.55	6.50491e+06	6.17598e+06	1.66347e+06	1.12421e+06
114	M1099T371_2	10.1755	-42.7231	0.00864765	1099.38	1099.38	1099.38	370.604	370.532	370.676	2	2	0	http://metlin.scripps.edu/metabo_list.php?mass_min=1098.23&mass_max=1098.53	3.17816e+06	3.14229e+06	246326	374815
115	M743T434	2.63867	-13.0378	0.0086856	743.355	743.355	743.355	433.697	433.183	434.283	4	2	2	http://metlin.scripps.edu/metabo_list.php?mass_min=742.2&mass_max=742.5	8.14941e+06	8.80978e+06	3.44621e+06	2.98097e+06
116	M285T127	2.73623	-11.031	0.00883919	285.17	285.17	285.17	126.68	126.244	127.116	2	2	0	http://metlin.scripps.edu/metabo_list.php?mass_min=284.02&mass_max=284.32	4.69289e+06	4.355e+06	1.85128e+06	1.45542e+06
117	M437T396	2.3808	-16.2164	0.00883948	437.218	437.218	437.218	395.774	395.774	395.774	1	1	0	http://metlin.scripps.edu/metabo_list.php?mass_min=436.07&mass_max=436.37	4.10088e+06	3.85541e+06	1.74289e+06	1.59896e+06
118	M730T373	1.33859	-10.6016	0.00901608	730.267	730.267	730.268	372.566	372.211	373.032	4	2	2	http://metlin.scripps.edu/metabo_list.php?mass_min=729.12&mass_max=729.42	2.26562e+07	2.18726e+07	1.6274e+07	1.69915e+07
119	M305T84	1.30651	-35.1923	0.00901959	304.9	304.899	304.902	83.8348	83.4331	84.2462	4	2	2	http://metlin.scripps.edu/metabo_list.php?mass_min=303.75&mass_max=304.05	1.7441e+06	1.72214e+06	1.32295e+06	1.33012e+06
120	M471T372	1.61957	-12.0779	0.00907081	471.124	471.124	471.124	371.853	371.583	371.955	4	2	2	http://metlin.scripps.edu/metabo_list.php?mass_min=469.97&mass_max=470.27	5.23079e+06	5.50382e+06	3.41533e+06	3.21271e+06
121	M612T557	2.96086	-10.8464	0.00918596	612.186	612.185	612.187	556.744	556.382	557.095	4	2	2	http://metlin.scripps.edu/metabo_list.php?mass_min=611.04&mass_max=611.34	4.43097e+06	4.09415e+06	1.63807e+06	1.24121e+06
122	M1106T753	3.88004	-10.954	0.00919428	1105.62	1105.62	1105.62	753.12	752.832	753.567	4	2	2	http://metlin.scripps.edu/metabo_list.php?mass_min=1104.47&mass_max=1104.77	7.68143e+06	8.52495e+06	2.44003e+06	1.73683e+06
123	M281T265	13.5085	-19.3547	0.00922094	281.172	281.169	281.174	265.067	264.744	265.389	2	2	0	http://metlin.scripps.edu/metabo_list.php?mass_min=280.02&mass_max=280.32	1.05597e+07	1.15008e+07	1.05536e+06	577724
124	M454T372	1.65184	-13.5399	0.00946451	454.146	454.146	454.147	372.094	371.897	402.137	5	2	2	http://metlin.scripps.edu/metabo_list.php?mass_min=453&mass_max=453.3	5.25434e+08	5.42449e+08	3.36271e+08	3.10211e+08
125	M222T86	1.98556	-21.4692	0.00963574	222.027	222.024	222.029	86.2045	85.9158	86.4932	2	2	0	http://metlin.scripps.edu/metabo_list.php?mass_min=220.88&mass_max=221.18	541611	531212	258897	281415
126	M308T220	4.61876	-19.3172	0.00973067	308.155	308.155	308.155	220.048	219.75	220.347	2	2	0	http://metlin.scripps.edu/metabo_list.php?mass_min=307&mass_max=307.3	1.35933e+07	1.31125e+07	3.37634e+06	2.4057e+06
127	M786T396	8.34374	-10.1067	0.00978403	786.332	786.332	786.332	395.839	395.774	395.903	2	2	0	http://metlin.scripps.edu/metabo_list.php?mass_min=785.18&mass_max=785.48	2.07311e+06	2.33567e+06	404259	124135
128	M477T283	5.24717	48.2437	0.00982258	476.999	476.999	476.999	282.876	282.876	282.876	1	0	1	http://metlin.scripps.edu/metabo_list.php?mass_min=475.85&mass_max=476.15	359615	302471	1.74278e+06	1.73129e+06
129	M467T618	1.7861	10.5974	0.00988019	467.169	467.133	467.205	618.251	610.254	626.313	4	2	2	http://metlin.scripps.edu/metabo_list.php?mass_min=466.02&mass_max=466.32	1.99315e+07	1.77765e+07	3.45668e+07	3.27836e+07
130	M910T466	7.35266	10.0569	0.0100292	910.315	910.315	910.316	466.471	466.312	466.631	2	0	2	http://metlin.scripps.edu/metabo_list.php?mass_min=909.17&mass_max=909.47	297160	818012	4.33687e+06	3.86261e+06
131	M477T262	3.36933	15.8937	0.0100364	477.271	477.271	477.271	261.693	261.693	261.693	1	0	1	http://metlin.scripps.edu/metabo_list.php?mass_min=476.12&mass_max=476.42	2.23518e+06	2.90316e+06	8.46895e+06	8.84383e+06
132	M1022T391	53.4976	-53.8875	0.0101291	1021.9	1021.9	1021.9	390.912	390.69	391.133	2	2	0	http://metlin.scripps.edu/metabo_list.php?mass_min=1020.75&mass_max=1021.05	1.50491e+06	1.56017e+06	32587.5	24706.3
133	M1027T567	13.3324	-13.5391	0.010182	1027.46	1027.46	1027.46	567.004	567.004	567.004	1	1	0	http://metlin.scripps.edu/metabo_list.php?mass_min=1026.31&mass_max=1026.61	2.50122e+06	2.8081e+06	295813	102415
134	M431T361	2.05227	-10.3595	0.0102134	431.203	431.202	431.204	360.808	360.739	360.967	4	2	2	http://metlin.scripps.edu/metabo_list.php?mass_min=430.05&mass_max=430.35	1.64135e+07	1.54043e+07	8.35628e+06	7.14741e+06
135	M284T230	12.4142	-24.2904	0.0102147	284.185	284.185	284.185	229.834	229.713	229.954	2	2	0	http://metlin.scripps.edu/metabo_list.php?mass_min=283.03&mass_max=283.33	2.00653e+07	2.15225e+07	1.97272e+06	1.37731e+06
136	M476T548	5.25135	-14.4955	0.0103581	476.219	476.218	476.219	548.484	548.443	548.524	2	2	0	http://metlin.scripps.edu/metabo_list.php?mass_min=475.07&mass_max=475.37	7.01792e+06	7.7264e+06	1.61371e+06	1.194e+06
137	M393T330	3.39291	-10.9077	0.0104502	393.165	393.164	393.165	329.995	329.684	330.007	4	2	2	http://metlin.scripps.edu/metabo_list.php?mass_min=392.01&mass_max=392.31	1.69367e+07	1.5658e+07	5.64097e+06	3.96571e+06
138	M246T372	2.47017	-9.70419	0.0104848	246.084	246.084	246.084	371.526	371.3	371.64	4	2	2	http://metlin.scripps.edu/metabo_list.php?mass_min=244.93&mass_max=245.23	2.34205e+07	2.55098e+07	1.09814e+07	8.82716e+06
139	M554T372	1.4194	-24.9499	0.0105251	554.113	554.113	554.113	371.938	371.583	372.719	4	2	2	http://metlin.scripps.edu/metabo_list.php?mass_min=552.96&mass_max=553.26	2.89243e+06	2.9176e+06	2.01464e+06	2.07867e+06
140	M668T537	6.4376	41.127	0.0107864	668.201	668.2	668.201	536.535	535.964	537.105	2	0	2	http://metlin.scripps.edu/metabo_list.php?mass_min=667.05&mass_max=667.35	147245	156152	996131	957019
141	M298T371	2.41362	-13.1316	0.0108017	298.086	298.074	298.098	371.37	370.988	371.64	4	2	2	http://metlin.scripps.edu/metabo_list.php?mass_min=296.94&mass_max=297.24	2.59676e+08	2.80065e+08	1.18211e+08	1.05412e+08
142	M882T370	2.79214	-12.4884	0.0108572	882.357	882.355	882.357	369.591	369.39	369.908	4	2	2	http://metlin.scripps.edu/metabo_list.php?mass_min=881.21&mass_max=881.51	2.72427e+08	2.96926e+08	1.09958e+08	9.39551e+07
143	M400T371	2.76968	-13.9247	0.0109893	400.139	400.138	400.14	371.057	370.676	371.326	4	2	2	http://metlin.scripps.edu/metabo_list.php?mass_min=398.99&mass_max=399.29	9.2478e+07	1.00074e+08	3.7017e+07	3.25044e+07
144	M739T525	9.02142	-9.51	0.0110152	739.37	739.37	739.371	525.317	525.309	525.325	2	2	0	http://metlin.scripps.edu/metabo_list.php?mass_min=738.22&mass_max=738.52	1.55865e+06	1.77183e+06	298074	71101.3
145	M280T335	2.37621	-9.78884	0.0110228	280.118	280.118	280.119	334.936	334.815	335.697	4	2	2	http://metlin.scripps.edu/metabo_list.php?mass_min=278.97&mass_max=279.27	4.50267e+07	4.92516e+07	2.1659e+07	1.8017e+07
146	M522T1007	Inf	57.2609	0.0111167	521.773	521.773	521.773	1006.97	1006.97	1006.97	1	0	1	http://metlin.scripps.edu/metabo_list.php?mass_min=520.62&mass_max=520.92	0	0	1.87398e+07	1.9406e+07
147	M478T317	1.503	-10.2857	0.0111515	478.222	478.222	478.223	317.193	316.957	317.243	4	2	2	http://metlin.scripps.edu/metabo_list.php?mass_min=477.07&mass_max=477.37	1.84148e+07	1.93813e+07	1.21933e+07	1.29537e+07
148	M412T659	2.67697	-18.1544	0.0111925	412.278	412.278	412.278	659.084	659.084	659.084	1	1	0	http://metlin.scripps.edu/metabo_list.php?mass_min=411.13&mass_max=411.43	3.88445e+07	4.00284e+07	1.5957e+07	1.35064e+07
149	M449T372	2.73621	9.39258	0.0112683	449.168	449.146	449.19	371.936	369.703	374.288	4	2	2	http://metlin.scripps.edu/metabo_list.php?mass_min=448.02&mass_max=448.32	2.46267e+06	1.90828e+06	6.27379e+06	5.68603e+06
150	M401T371	2.75796	-11.5198	0.0113893	401.144	401.142	401.147	370.843	370.532	371.27	4	2	2	http://metlin.scripps.edu/metabo_list.php?mass_min=399.99&mass_max=400.29	2.13687e+07	2.34127e+07	8.81892e+06	7.41824e+06
151	M409T371	2.34861	-46.6146	0.0114267	409.109	409.108	409.109	371.285	371.011	371.469	4	2	2	http://metlin.scripps.edu/metabo_list.php?mass_min=407.96&mass_max=408.26	3.86753e+06	3.85281e+06	1.69058e+06	1.59662e+06
152	M871T392	2.75575	-10.5611	0.0115612	871.388	871.376	871.395	392.13	391.091	392.706	4	2	2	http://metlin.scripps.edu/metabo_list.php?mass_min=870.24&mass_max=870.54	5.0082e+06	4.66027e+06	1.9883e+06	1.52017e+06
153	M460T497	5.43453	44.8174	0.0116348	460.133	460.133	460.133	496.912	496.817	497.007	2	0	2	http://metlin.scripps.edu/metabo_list.php?mass_min=458.98&mass_max=459.28	389075	401944	2.18801e+06	2.1108e+06
154	M871T1009	1.36656	-12.6526	0.0116573	870.755	870.755	870.755	1009.08	1008.86	1009.35	4	2	2	http://metlin.scripps.edu/metabo_list.php?mass_min=869.6&mass_max=869.9	4.9699e+06	4.85966e+06	3.68489e+06	3.50804e+06
155	M255T371	2.55012	-12.0468	0.0116574	255.065	255.065	255.065	371.313	371.27	371.469	4	2	2	http://metlin.scripps.edu/metabo_list.php?mass_min=253.91&mass_max=254.21	7.21754e+07	7.85523e+07	3.16254e+07	2.74807e+07
156	M256T334	6.29289	16.585	0.0117145	256.132	256.132	256.133	334.321	334.172	334.469	2	0	2	http://metlin.scripps.edu/metabo_list.php?mass_min=254.98&mass_max=255.28	1.97787e+06	2.64219e+06	1.38786e+07	1.51949e+07
157	M307T221	4.30654	-16.5072	0.0117642	307.151	307.151	307.152	221.4	219.75	222.551	4	2	2	http://metlin.scripps.edu/metabo_list.php?mass_min=306&mass_max=306.3	8.18824e+07	7.85173e+07	2.19521e+07	1.52935e+07
158	M734T221	11.8536	-10.8405	0.012064	734.326	734.326	734.326	221.452	221.452	221.452	1	1	0	http://metlin.scripps.edu/metabo_list.php?mass_min=733.18&mass_max=733.48	1.64317e+06	1.43091e+06	204437	54899.8
159	M382T371	2.82475	-14.3869	0.0120865	382.129	382.128	382.131	370.745	370.052	371.326	4	2	2	http://metlin.scripps.edu/metabo_list.php?mass_min=380.98&mass_max=381.28	2.02908e+08	2.19506e+08	7.93598e+07	7.01809e+07
160	M408T398	3.31459	-9.11428	0.0120995	408.155	408.155	408.155	398.14	398.07	398.211	2	2	0	http://metlin.scripps.edu/metabo_list.php?mass_min=407.01&mass_max=407.31	1.05363e+07	1.17969e+07	3.94742e+06	2.79043e+06
161	M653T558	4.09789	-9.36376	0.012144	653.213	653.213	653.213	557.794	557.474	558.113	2	2	0	http://metlin.scripps.edu/metabo_list.php?mass_min=652.06&mass_max=652.36	2.84842e+06	2.51853e+06	795303	514386
162	M219T711	2.31944	15.3103	0.0122753	219.174	219.174	219.174	710.977	710.866	711.087	2	0	2	http://metlin.scripps.edu/metabo_list.php?mass_min=218.02&mass_max=218.32	1.61803e+08	1.75274e+08	4.03784e+08	3.78047e+08
163	M333T687	4.70827	-45.223	0.0122892	333.137	333.136	333.137	687.268	687.002	687.534	2	2	0	http://metlin.scripps.edu/metabo_list.php?mass_min=331.99&mass_max=332.29	4.17985e+06	4.16011e+06	957622	813721
164	M268T497	9.50248	12.357	0.0122951	268.143	268.142	268.144	497.239	496.791	497.637	4	2	2	http://metlin.scripps.edu/metabo_list.php?mass_min=266.99&mass_max=267.29	1.888e+06	4.03165e+06	2.98573e+07	2.63939e+07
165	M451T315	3.26937	-9.48531	0.0123574	451.146	451.146	451.146	314.715	314.715	314.715	1	1	0	http://metlin.scripps.edu/metabo_list.php?mass_min=450&mass_max=450.3	1.20378e+07	1.34832e+07	4.49444e+06	3.31166e+06
166	M357T809	1.20701	30.6833	0.0124512	357.356	357.356	357.356	809.317	809.087	809.536	4	2	2	http://metlin.scripps.edu/metabo_list.php?mass_min=356.21&mass_max=356.51	1.46188e+06	1.44303e+06	1.75045e+06	1.7558e+06
167	M875T468	5.47507	-12.8434	0.0125611	875.326	875.326	875.326	468.352	468.127	468.578	2	2	0	http://metlin.scripps.edu/metabo_list.php?mass_min=874.18&mass_max=874.48	2.9533e+06	2.76756e+06	679011	365880
168	M312T230	4.59524	-14.9573	0.012584	312.217	312.216	312.217	230.353	230.3	230.406	2	2	0	http://metlin.scripps.edu/metabo_list.php?mass_min=311.07&mass_max=311.37	1.62566e+07	1.48181e+07	3.7596e+06	3.00278e+06
169	M268T230	6.26695	-14.4912	0.0127355	268.163	268.163	268.163	229.673	228.675	230.671	2	2	0	http://metlin.scripps.edu/metabo_list.php?mass_min=267.01&mass_max=267.31	2.02314e+07	2.24113e+07	3.98616e+06	2.81821e+06
170	M237T725	3.79196	19.731	0.0128342	237.184	237.184	237.185	725.103	724.965	725.242	2	0	2	http://metlin.scripps.edu/metabo_list.php?mass_min=236.03&mass_max=236.33	3.42114e+06	3.81814e+06	1.41977e+07	1.32534e+07
171	M363T423	1.33759	10.3173	0.0129066	363.176	363.176	363.176	422.752	422.752	422.752	1	0	1	http://metlin.scripps.edu/metabo_list.php?mass_min=362.03&mass_max=362.33	1.42694e+06	1.37374e+06	1.83577e+06	1.91039e+06
172	M528T567	4.73816	-15.4415	0.0129241	528.233	528.232	528.233	567.162	566.052	567.656	4	2	2	http://metlin.scripps.edu/metabo_list.php?mass_min=527.08&mass_max=527.38	9.33786e+07	9.7792e+07	2.45302e+07	1.58168e+07
173	M265T87	4.33501	47.2061	0.0129696	265.015	264.978	265.022	86.6164	84.4563	88.8175	4	2	2	http://metlin.scripps.edu/metabo_list.php?mass_min=263.86&mass_max=264.16	755410	763211	3.23812e+06	3.34512e+06
174	M512T377	27.0536	46.3021	0.0133803	512.152	512.152	512.152	376.724	376.67	376.778	2	0	2	http://metlin.scripps.edu/metabo_list.php?mass_min=511&mass_max=511.3	1.65135e+06	1.54203e+06	4.40929e+07	4.22994e+07
175	M863T374	3.36818	-17.6847	0.0134951	863.32	863.319	863.322	373.567	372.585	373.804	4	2	2	http://metlin.scripps.edu/metabo_list.php?mass_min=862.17&mass_max=862.47	7.13062e+07	6.9036e+07	2.3382e+07	1.8285e+07
176	M388T635	7.19868	12.106	0.0135485	388.115	388.115	388.115	635.451	635.441	635.461	2	0	2	http://metlin.scripps.edu/metabo_list.php?mass_min=386.97&mass_max=387.27	169382	434703	2.2538e+06	2.09481e+06
177	M570T388	3.08254	-15.2465	0.0135922	570.284	570.283	570.284	387.921	387.854	387.989	2	2	0	http://metlin.scripps.edu/metabo_list.php?mass_min=569.13&mass_max=569.43	3.15143e+06	3.02931e+06	1.12512e+06	879969
178	M358T371	2.45594	-11.2933	0.0136635	358.112	358.112	358.113	371.47	371.157	371.897	4	2	2	http://metlin.scripps.edu/metabo_list.php?mass_min=356.96&mass_max=357.26	2.31018e+07	2.4437e+07	1.07325e+07	8.62421e+06
179	M330T269	1.6112	9.67663	0.0137574	330.188	330.187	330.19	269.305	269.234	269.377	2	0	2	http://metlin.scripps.edu/metabo_list.php?mass_min=329.04&mass_max=329.34	1.01861e+07	1.12778e+07	1.68894e+07	1.76931e+07
180	M286T496	6.64024	9.01932	0.0137664	286.159	286.158	286.16	496.126	495.875	496.377	2	0	2	http://metlin.scripps.edu/metabo_list.php?mass_min=285.01&mass_max=285.31	416614	957038	4.89455e+06	4.22683e+06
181	M392T397	3.8137	-9.3478	0.0138109	392.161	392.161	392.165	397.069	396.749	397.282	4	2	2	http://metlin.scripps.edu/metabo_list.php?mass_min=391.01&mass_max=391.31	1.81073e+08	1.59725e+08	5.28622e+07	3.64992e+07
182	M843T493	1.56353	-14.5046	0.0138374	843.34	843.33	843.341	493.121	490.085	497.322	4	2	2	http://metlin.scripps.edu/metabo_list.php?mass_min=842.19&mass_max=842.49	1.8908e+07	1.84839e+07	1.23709e+07	1.15442e+07
183	M228T371	2.40152	-10.6281	0.0140077	228.072	228.071	228.072	371.385	371.3	371.469	2	2	0	http://metlin.scripps.edu/metabo_list.php?mass_min=226.92&mass_max=227.22	1.50061e+07	1.64472e+07	7.02458e+06	6.07266e+06
184	M492T433	2.82101	-25.4572	0.01404	492.242	492.242	492.242	433.243	432.868	433.618	2	1	1	http://metlin.scripps.edu/metabo_list.php?mass_min=491.09&mass_max=491.39	7.80767e+06	7.6905e+06	2.93448e+06	2.55937e+06
185	M887T371	1.67831	-20.4518	0.0140537	887.31	887.31	887.31	371.469	371.27	371.781	4	2	2	http://metlin.scripps.edu/metabo_list.php?mass_min=886.16&mass_max=886.46	2.30982e+08	2.27725e+08	1.40887e+08	1.32428e+08
186	M369T569	3.9063	-8.4661	0.0141905	369.115	369.1	369.134	568.869	565.946	570.443	4	2	2	http://metlin.scripps.edu/metabo_list.php?mass_min=367.96&mass_max=368.26	1.51933e+07	1.33243e+07	4.48499e+06	2.81541e+06
187	M332T126	2.45772	-8.32897	0.0142615	332.242	332.241	332.243	125.835	124.112	127.321	4	2	2	http://metlin.scripps.edu/metabo_list.php?mass_min=331.09&mass_max=331.39	9.08971e+06	1.00836e+07	4.3687e+06	3.43257e+06
188	M685T451	3.18446	8.43212	0.0143425	685.326	685.325	685.326	451.471	451.197	451.745	2	0	2	http://metlin.scripps.edu/metabo_list.php?mass_min=684.18&mass_max=684.48	492857	729467	1.841e+06	2.05145e+06
189	M758T374	4.08009	-8.30573	0.0143617	758.274	758.274	758.274	373.731	373.659	373.804	2	2	0	http://metlin.scripps.edu/metabo_list.php?mass_min=757.12&mass_max=757.42	1.19605e+07	1.05602e+07	3.50633e+06	2.01332e+06
190	M886T371	1.68725	-22.3056	0.0144087	886.307	886.307	886.307	371.469	371.27	371.781	4	2	2	http://metlin.scripps.edu/metabo_list.php?mass_min=885.16&mass_max=885.46	7.58533e+08	7.49449e+08	4.59873e+08	4.33877e+08
191	M428T346	2.78022	-11.119	0.0144524	428.181	428.181	428.182	346.213	346.022	346.27	4	2	2	http://metlin.scripps.edu/metabo_list.php?mass_min=427.03&mass_max=427.33	2.29633e+08	2.16058e+08	9.10449e+07	6.92625e+07
192	M476T318	2.23443	-15.6741	0.0145235	476.129	476.129	476.129	317.696	317.559	317.832	2	2	0	http://metlin.scripps.edu/metabo_list.php?mass_min=474.98&mass_max=475.28	2.04185e+06	2.1764e+06	975549	912295
193	M211T371	2.52248	-13.7762	0.0145865	211.077	211.076	211.079	371.285	371.157	371.326	4	2	2	http://metlin.scripps.edu/metabo_list.php?mass_min=209.93&mass_max=210.23	1.57349e+07	1.70079e+07	6.82088e+06	6.15951e+06
194	M312T409	2.7303	-8.51673	0.0145947	312.217	312.217	312.217	408.826	408.432	409.221	2	2	0	http://metlin.scripps.edu/metabo_list.php?mass_min=311.07&mass_max=311.37	1.7754e+07	1.98888e+07	7.80025e+06	5.98681e+06
195	M319T371	2.67132	-11.9026	0.0146443	319.089	319.088	319.089	371.285	371.157	371.326	4	2	2	http://metlin.scripps.edu/metabo_list.php?mass_min=317.94&mass_max=318.24	1.20707e+07	1.32187e+07	5.06858e+06	4.39843e+06
196	M847T392	5.3907	-12.2685	0.0147289	847.315	847.315	847.315	392.463	392.319	393.022	4	2	2	http://metlin.scripps.edu/metabo_list.php?mass_min=846.17&mass_max=846.47	9.11621e+07	8.12097e+07	1.88121e+07	1.31637e+07
197	M885T371	1.69057	-25.2288	0.0147754	885.304	885.304	885.304	371.469	371.27	371.781	4	2	2	http://metlin.scripps.edu/metabo_list.php?mass_min=884.15&mass_max=884.45	1.5187e+09	1.50459e+09	9.17602e+08	8.70726e+08
198	M753T501	9.876	18.5153	0.0147803	753.372	753.371	753.372	501.22	500.24	501.422	3	1	2	http://metlin.scripps.edu/metabo_list.php?mass_min=752.22&mass_max=752.52	1.4973e+06	3.89064e+06	2.70913e+07	2.612e+07
199	M627T555	3.95697	-8.90821	0.0148517	627.342	627.342	627.342	555.423	555.423	555.423	1	1	0	http://metlin.scripps.edu/metabo_list.php?mass_min=626.19&mass_max=626.49	1.36692e+06	1.23323e+06	414723	242383
200	M582T733	2.59731	-27.9628	0.0149119	582.412	582.41	582.412	733.317	733.272	733.342	3	2	1	http://metlin.scripps.edu/metabo_list.php?mass_min=581.26&mass_max=581.56	5.76018e+06	5.52019e+06	2.20298e+06	2.14012e+06
201	M492T332	2.86669	-17.3415	0.0150022	492.124	492.124	492.124	331.829	331.665	331.994	2	2	0	http://metlin.scripps.edu/metabo_list.php?mass_min=490.97&mass_max=491.27	1.58247e+06	1.47674e+06	556038	511121
202	M267T229	7.97385	-18.4389	0.0150069	267.159	267.159	267.159	228.675	227.114	230.3	3	2	1	http://metlin.scripps.edu/metabo_list.php?mass_min=266.01&mass_max=266.31	1.22658e+08	1.33946e+08	1.83662e+07	1.38144e+07
203	M379T764	1.34183	11.2482	0.0151781	379.129	379.127	379.129	763.581	763.11	763.825	4	2	2	http://metlin.scripps.edu/metabo_list.php?mass_min=377.98&mass_max=378.28	2.19982e+07	2.08813e+07	2.8433e+07	2.91043e+07
204	M473T263	2.84774	-13.9554	0.0152024	473.161	473.161	473.161	262.889	262.701	263.076	2	2	0	http://metlin.scripps.edu/metabo_list.php?mass_min=472.01&mass_max=472.31	1.02845e+07	1.1176e+07	3.99213e+06	3.54385e+06
205	M449T523	3.88243	11.4024	0.0152199	449.103	449.103	449.103	523.16	522.976	523.345	2	0	2	http://metlin.scripps.edu/metabo_list.php?mass_min=447.95&mass_max=448.25	505970	655798	2.38153e+06	2.12894e+06
206	M296T498	8.35177	11.3984	0.0152616	296.139	296.139	296.14	497.704	497.445	498.001	4	2	2	http://metlin.scripps.edu/metabo_list.php?mass_min=294.99&mass_max=295.29	3.4234e+07	6.77691e+07	4.54254e+08	3.97652e+08
207	M838T368	5.35992	-40.2532	0.0156076	838.361	838.361	838.361	367.994	367.715	368.175	4	2	2	http://metlin.scripps.edu/metabo_list.php?mass_min=837.21&mass_max=837.51	1.49555e+07	1.49295e+07	3.0895e+06	2.48615e+06
208	M281T338	3.09918	-10.5214	0.0156146	281.129	281.128	281.131	338.287	335.851	342.344	4	2	2	http://metlin.scripps.edu/metabo_list.php?mass_min=279.98&mass_max=280.28	9.83167e+06	8.81514e+06	3.3276e+06	2.6891e+06
209	M242T372	2.62013	-11.4819	0.0156271	242.081	242.081	242.081	371.526	371.3	371.64	4	2	2	http://metlin.scripps.edu/metabo_list.php?mass_min=240.93&mass_max=241.23	3.26324e+07	3.58192e+07	1.39891e+07	1.21362e+07
210	M377T489	1.90296	-12.7709	0.0156934	377.169	377.169	377.169	488.712	487.562	489.15	4	2	2	http://metlin.scripps.edu/metabo_list.php?mass_min=376.02&mass_max=376.32	4.69417e+07	4.86066e+07	2.66729e+07	2.35374e+07
211	M718T360	3.53662	-8.12268	0.0158235	718.326	718.325	718.327	359.947	359.893	360.001	2	2	0	http://metlin.scripps.edu/metabo_list.php?mass_min=717.18&mass_max=717.48	3.55585e+06	4.0664e+06	1.2969e+06	858335
212	M872T372	3.19625	-8.22913	0.0162073	872.322	872.318	872.326	372.165	372.094	372.237	2	2	0	http://metlin.scripps.edu/metabo_list.php?mass_min=871.17&mass_max=871.47	9.56487e+06	8.60546e+06	3.43013e+06	2.25475e+06
213	M202T261	2.09848	8.83126	0.0162138	202.089	202.086	202.091	261.192	261.009	261.414	3	1	2	http://metlin.scripps.edu/metabo_list.php?mass_min=200.94&mass_max=201.24	2.89903e+06	3.36087e+06	6.88156e+06	6.25469e+06
214	M916T371	2.57862	-26.8338	0.0163336	916.235	916.234	916.238	371.313	371.27	371.469	4	2	2	http://metlin.scripps.edu/metabo_list.php?mass_min=915.08&mass_max=915.38	2.95153e+07	2.98404e+07	1.21665e+07	1.08519e+07
215	M757T374	3.94987	-9.89725	0.01635	757.271	757.271	757.271	373.659	373.472	373.804	3	2	1	http://metlin.scripps.edu/metabo_list.php?mass_min=756.12&mass_max=756.42	2.62042e+07	2.41377e+07	7.96631e+06	4.77889e+06
216	M287T338	12.3913	11.4891	0.0164585	287.175	287.174	287.176	337.618	337.55	337.715	3	1	2	http://metlin.scripps.edu/metabo_list.php?mass_min=286.02&mass_max=286.32	2.17719e+06	6.3241e+06	4.90018e+07	5.634e+07
217	M465T657	473.004	-38.3445	0.0165112	465.135	465.122	465.147	656.821	656.468	657.174	2	2	0	http://metlin.scripps.edu/metabo_list.php?mass_min=463.98&mass_max=464.28	1.09729e+07	1.1559e+07	31933	15702.8
218	M353T497	8.99303	11.4081	0.0165464	353.204	353.204	353.205	497.401	496.791	497.637	4	2	2	http://metlin.scripps.edu/metabo_list.php?mass_min=352.05&mass_max=352.35	5.90844e+07	1.21471e+08	8.66893e+08	7.56841e+08
219	M260T497	3.10161	-12.5664	0.0165555	260.164	260.163	260.166	497.236	497.117	497.356	2	2	0	http://metlin.scripps.edu/metabo_list.php?mass_min=259.01&mass_max=259.31	3.98272e+06	3.61943e+06	1.32045e+06	1.13059e+06
220	M841T374	3.75488	-8.23521	0.0166271	841.331	841.328	841.336	373.597	373.176	373.788	4	2	2	http://metlin.scripps.edu/metabo_list.php?mass_min=840.18&mass_max=840.48	1.38639e+07	1.24055e+07	4.41325e+06	2.58284e+06
221	M625T724	3.84994	-14.7565	0.0166414	625.428	625.426	625.43	723.595	723.401	723.789	2	2	0	http://metlin.scripps.edu/metabo_list.php?mass_min=624.28&mass_max=624.58	2.43267e+06	2.33342e+06	727740	510224
2206	M1190T536	Inf	4.63626	0.135241	1190.48	1190.48	1190.48	535.644	535.644	535.644	1	0	1	http://metlin.scripps.edu/metabo_list.php?mass_min=1189.33&mass_max=1189.63	0	0	1.66874e+07	1.0766e+07
223	M864T373	3.22745	-12.67	0.016939	864.323	864.322	864.323	373.408	372.585	373.49	4	2	2	http://metlin.scripps.edu/metabo_list.php?mass_min=863.17&mass_max=863.47	3.5976e+07	3.42317e+07	1.25783e+07	9.17495e+06
224	M321T710	2.2795	8.29284	0.0171245	321.133	321.133	321.134	710.498	710.447	710.548	2	0	2	http://metlin.scripps.edu/metabo_list.php?mass_min=319.98&mass_max=320.28	1.43645e+06	1.73489e+06	3.80841e+06	3.42066e+06
225	M204T494	87.6167	28.0133	0.0171851	204.184	204.183	204.185	493.601	493.534	493.669	2	0	2	http://metlin.scripps.edu/metabo_list.php?mass_min=203.03&mass_max=203.33	4219.11	19298.4	1.06583e+06	994694
226	M488T262	2.46537	-13.9965	0.0171979	488.132	488.132	488.132	262.368	262.368	262.368	1	1	0	http://metlin.scripps.edu/metabo_list.php?mass_min=486.98&mass_max=487.28	1.52089e+06	1.57662e+06	687782	568628
227	M244T371	2.62504	-11.5181	0.0172841	244.097	244.097	244.097	371.313	371.27	371.469	4	2	2	http://metlin.scripps.edu/metabo_list.php?mass_min=242.95&mass_max=243.25	1.1898e+08	1.30746e+08	5.07957e+07	4.43366e+07
228	M875T370	3.68506	-9.29325	0.0173589	874.802	874.802	874.802	370.33	370.33	370.33	1	0	1	http://metlin.scripps.edu/metabo_list.php?mass_min=873.65&mass_max=873.95	2.98665e+06	3.25821e+06	1.05103e+06	643614
229	M235T511	1.27149	-35.8295	0.0174354	235.133	235.133	235.133	510.847	510.811	510.884	2	0	2	http://metlin.scripps.edu/metabo_list.php?mass_min=233.98&mass_max=234.28	2.50237e+06	2.5008e+06	1.95256e+06	1.98233e+06
230	M645T85	1.38961	-7.52072	0.0174922	644.831	644.831	644.832	84.5082	84.4325	84.5807	4	2	2	http://metlin.scripps.edu/metabo_list.php?mass_min=643.68&mass_max=643.98	939937	893444	684724	634624
231	M228T837	1.07573	9.5071	0.0175502	228.232	228.232	228.232	836.737	836.721	836.938	4	2	2	http://metlin.scripps.edu/metabo_list.php?mass_min=227.08&mass_max=227.38	9.62714e+06	9.54415e+06	1.02475e+07	1.03757e+07
232	M422T372	1.59972	-7.60876	0.0177057	422.12	422.119	422.12	371.897	371.3	371.955	3	1	2	http://metlin.scripps.edu/metabo_list.php?mass_min=420.97&mass_max=421.27	3.38014e+06	3.60657e+06	2.31338e+06	2.05409e+06
233	M878T374	3.60655	-10.4678	0.0177059	878.375	878.375	878.375	373.575	373.49	373.659	2	2	0	http://metlin.scripps.edu/metabo_list.php?mass_min=877.23&mass_max=877.53	7.59829e+06	7.08402e+06	2.47229e+06	1.59872e+06
234	M253T354	2.54207	-9.58592	0.0177138	253.18	253.18	253.18	354.481	354.027	354.935	2	2	0	http://metlin.scripps.edu/metabo_list.php?mass_min=252.03&mass_max=252.33	2.71879e+07	2.91053e+07	1.25735e+07	9.57113e+06
235	M687T836	6.60418	-33.3239	0.0178372	687.335	687.335	687.335	836.101	836.101	836.101	2	2	0	http://metlin.scripps.edu/metabo_list.php?mass_min=686.18&mass_max=686.48	2.5525e+06	2.68519e+06	389800	403287
236	M293T207	2.77948	-9.38825	0.0179773	293.172	293.172	293.173	207.43	200.488	211.047	4	2	2	http://metlin.scripps.edu/metabo_list.php?mass_min=292.02&mass_max=292.32	7.62525e+07	8.21141e+07	3.30238e+07	2.39532e+07
237	M913T502	2.7569	-8.20772	0.0179833	913.41	913.41	913.41	502.428	502.428	502.428	1	1	0	http://metlin.scripps.edu/metabo_list.php?mass_min=912.26&mass_max=912.56	5.21482e+06	5.72547e+06	2.32357e+06	1.64476e+06
238	M1236T392	8.62136	-29.8388	0.0179919	1235.53	1235.53	1235.53	391.539	391.448	391.63	2	2	0	http://metlin.scripps.edu/metabo_list.php?mass_min=1234.38&mass_max=1234.68	3.02238e+07	2.99364e+07	4.36851e+06	2.60953e+06
239	M238T725	10.7913	30.5264	0.0180073	238.187	238.187	238.187	725.429	725.293	725.565	2	0	2	http://metlin.scripps.edu/metabo_list.php?mass_min=237.04&mass_max=237.34	169710	186787	1.98006e+06	1.867e+06
240	M352T497	8.76294	11.1839	0.0180605	352.202	352.202	352.202	497.239	496.791	497.637	4	2	2	http://metlin.scripps.edu/metabo_list.php?mass_min=351.05&mass_max=351.35	2.58874e+08	5.188e+08	3.6439e+09	3.17081e+09
241	M453T493	1.65273	-7.33603	0.0180893	453.198	453.198	453.198	493.226	493.226	493.226	1	1	0	http://metlin.scripps.edu/metabo_list.php?mass_min=452.05&mass_max=452.35	2.64474e+06	2.45211e+06	1.63966e+06	1.44424e+06
242	M354T500	8.86835	11.8138	0.0183795	354.207	354.207	354.207	499.534	497.033	499.967	3	1	2	http://metlin.scripps.edu/metabo_list.php?mass_min=353.06&mass_max=353.36	7.34719e+06	1.38517e+07	1.00265e+08	8.77338e+07
243	M221T372	2.61313	-12.7381	0.0184086	221.081	221.08	221.081	371.71	371.583	371.924	4	2	2	http://metlin.scripps.edu/metabo_list.php?mass_min=219.93&mass_max=220.23	1.13038e+07	1.23339e+07	4.77339e+06	4.27235e+06
244	M412T362	2.33637	-7.45773	0.0184141	412.187	412.186	412.187	362.29	360.967	363.425	4	2	2	http://metlin.scripps.edu/metabo_list.php?mass_min=411.04&mass_max=411.34	6.64315e+08	6.00548e+08	3.07244e+08	2.34135e+08
245	M330T371	2.48049	-18.0692	0.0184801	330.115	330.115	330.115	371.3	371.3	371.3	1	1	0	http://metlin.scripps.edu/metabo_list.php?mass_min=328.97&mass_max=329.27	3.39624e+06	3.47174e+06	1.49137e+06	1.27744e+06
246	M340T568	5.22184	-18.9005	0.0184987	340.132	340.129	340.137	567.7	567.589	567.753	4	2	2	http://metlin.scripps.edu/metabo_list.php?mass_min=338.98&mass_max=339.28	8.24834e+07	8.47644e+07	1.94047e+07	1.26238e+07
247	M620T267	2.62646	-12.7821	0.0185454	620.312	620.309	620.316	266.59	266.411	266.768	2	2	0	http://metlin.scripps.edu/metabo_list.php?mass_min=619.16&mass_max=619.46	1.83487e+06	1.75917e+06	762599	605796
248	M355T497	4.19707	7.43188	0.0185579	355.206	355.204	355.208	497.384	497.322	497.445	2	0	2	http://metlin.scripps.edu/metabo_list.php?mass_min=354.06&mass_max=354.36	1.17641e+06	2.30622e+06	7.80036e+06	6.81648e+06
249	M310T361	2.27705	-9.3875	0.0185885	310.12	310.119	310.121	360.692	360.537	360.757	4	2	2	http://metlin.scripps.edu/metabo_list.php?mass_min=308.97&mass_max=309.27	4.8669e+07	4.56526e+07	2.30912e+07	1.83315e+07
250	M1107T753	4.00256	-22.7765	0.0186011	1106.63	1106.63	1106.63	753.271	753.271	753.271	1	1	0	http://metlin.scripps.edu/metabo_list.php?mass_min=1105.48&mass_max=1105.78	5.65657e+06	5.75316e+06	1.60688e+06	1.24372e+06
251	M597T266	4.43001	-9.21437	0.0186027	597.283	597.283	597.283	265.729	265.729	265.729	1	1	0	http://metlin.scripps.edu/metabo_list.php?mass_min=596.13&mass_max=596.43	1.85959e+06	1.69755e+06	527063	275902
252	M349T658	3.68142	-9.76544	0.0186356	349.197	349.19	349.2	657.685	656.832	658.37	4	2	2	http://metlin.scripps.edu/metabo_list.php?mass_min=348.05&mass_max=348.35	2.46567e+07	2.80112e+07	8.1753e+06	6.13112e+06
253	M537T669	2.14055	-21.31	0.0186758	537.301	537.298	537.305	669.122	668.886	669.359	2	2	0	http://metlin.scripps.edu/metabo_list.php?mass_min=536.15&mass_max=536.45	2.22894e+06	2.33863e+06	1.0828e+06	1.05103e+06
254	M619T265	84.1215	-33.7814	0.0187512	619.343	619.343	619.343	265.065	265.05	265.079	2	2	0	http://metlin.scripps.edu/metabo_list.php?mass_min=618.19&mass_max=618.49	4.27938e+06	4.03623e+06	52661.9	46190.4
255	M226T371	2.60423	-11.0079	0.0188949	226.086	226.086	226.086	371.313	371.27	371.469	4	2	2	http://metlin.scripps.edu/metabo_list.php?mass_min=224.94&mass_max=225.24	2.24286e+07	2.47488e+07	9.68775e+06	8.42795e+06
256	M756T555	17.0599	-18.1878	0.0189153	756.31	756.31	756.31	555.112	555.093	555.13	2	2	0	http://metlin.scripps.edu/metabo_list.php?mass_min=755.16&mass_max=755.46	2.62625e+06	2.38115e+06	188882	104637
257	M240T186	1.58353	-9.89021	0.0189464	240.181	240.18	240.181	186.247	185.797	186.483	4	2	2	http://metlin.scripps.edu/metabo_list.php?mass_min=239.03&mass_max=239.33	6.37157e+06	5.97646e+06	4.01675e+06	3.78104e+06
258	M323T567	6.14125	-18.6862	0.0190918	323.122	323.122	323.122	567.004	567.004	567.004	1	1	0	http://metlin.scripps.edu/metabo_list.php?mass_min=321.97&mass_max=322.27	5.11223e+06	5.25827e+06	1.06486e+06	623800
259	M513T377	5.34772	13.4376	0.0192299	513.156	513.156	513.156	376.886	376.778	376.994	2	0	2	http://metlin.scripps.edu/metabo_list.php?mass_min=512.01&mass_max=512.31	2.90268e+06	1.58089e+06	1.22873e+07	1.16896e+07
260	M564T390	2.86742	-8.17007	0.0192761	564.301	564.301	564.301	389.97	389.878	390.062	2	2	0	http://metlin.scripps.edu/metabo_list.php?mass_min=563.15&mass_max=563.45	9.28328e+06	1.01903e+07	4.02552e+06	2.7658e+06
261	M879T408	11.0224	-13.9943	0.0193857	879.339	879.338	879.341	407.526	407.455	407.598	2	2	0	http://metlin.scripps.edu/metabo_list.php?mass_min=878.19&mass_max=878.49	5.91924e+06	5.25332e+06	651317	362303
262	M399T255	2.22443	-8.67488	0.0194666	399.173	399.173	399.173	254.85	254.85	254.85	1	1	0	http://metlin.scripps.edu/metabo_list.php?mass_min=398.02&mass_max=398.32	7.871e+06	8.44612e+06	4.09818e+06	3.23723e+06
263	M410T751	2.05144	-7.71775	0.019738	410.316	410.307	410.316	750.984	750.737	751.378	4	2	2	http://metlin.scripps.edu/metabo_list.php?mass_min=409.17&mass_max=409.47	1.04118e+08	1.12862e+08	5.86114e+07	4.71581e+07
264	M430T360	1.9908	-8.1224	0.019784	430.199	430.198	430.2	360.472	360.097	360.645	4	2	2	http://metlin.scripps.edu/metabo_list.php?mass_min=429.05&mass_max=429.35	7.40148e+07	6.69782e+07	3.79172e+07	3.2905e+07
265	M446T610	9.73348	11.8616	0.0198125	446.154	446.154	446.188	610.309	610.254	616.787	3	1	2	http://metlin.scripps.edu/metabo_list.php?mass_min=445&mass_max=445.3	8.1779e+06	4.15091e+06	6.40688e+07	5.59334e+07
266	M242T487	1.51626	-11.1446	0.019937	242.117	242.117	242.117	487.309	485.646	490.71	4	2	2	http://metlin.scripps.edu/metabo_list.php?mass_min=240.97&mass_max=241.27	1.01361e+07	9.854e+06	6.86276e+06	6.32108e+06
267	M543T563	22.1819	10.6092	0.0199961	542.766	542.766	542.766	562.957	562.957	562.957	1	0	1	http://metlin.scripps.edu/metabo_list.php?mass_min=541.62&mass_max=541.92	3861.52	159079	1.95011e+06	1.66421e+06
268	M369T223	5.60786	-26.6741	0.0201583	369.122	369.122	369.122	222.812	222.812	222.812	1	1	0	http://metlin.scripps.edu/metabo_list.php?mass_min=367.97&mass_max=368.27	4.6962e+06	4.64918e+06	975246	691234
269	M271T824	1.07784	8.895	0.0201644	271.227	271.225	271.227	824.406	824.003	824.486	4	2	2	http://metlin.scripps.edu/metabo_list.php?mass_min=270.08&mass_max=270.38	5.72573e+06	5.67214e+06	6.10048e+06	6.18461e+06
270	M912T610	1192.01	31.2139	0.0202976	912.279	912.279	912.279	609.947	609.918	609.976	2	0	2	http://metlin.scripps.edu/metabo_list.php?mass_min=911.13&mass_max=911.43	0	6484.41	3.98841e+06	3.74107e+06
271	M447T372	1.31284	-23.4193	0.0203408	447.024	447.024	447.024	371.926	371.897	371.955	2	0	2	http://metlin.scripps.edu/metabo_list.php?mass_min=445.87&mass_max=446.17	5.8835e+06	5.90956e+06	4.55e+06	4.43287e+06
272	M874T372	3.15838	-7.69159	0.0204697	874.321	874.321	874.322	372.322	372.237	372.407	2	2	0	http://metlin.scripps.edu/metabo_list.php?mass_min=873.17&mass_max=873.47	5.94938e+06	5.3493e+06	2.19106e+06	1.3863e+06
273	M249T367	3.21942	-12.2659	0.020543	249.185	249.185	249.185	367.47	367.398	367.541	2	2	0	http://metlin.scripps.edu/metabo_list.php?mass_min=248.03&mass_max=248.33	5.73729e+06	6.35221e+06	2.02212e+06	1.73306e+06
274	M373T569	3.50756	-6.98066	0.0205973	373.099	373.099	373.099	569.271	569.271	569.271	1	1	0	http://metlin.scripps.edu/metabo_list.php?mass_min=371.95&mass_max=372.25	1.58252e+06	1.38053e+06	535606	309153
275	M908T372	1.49783	-9.00764	0.0206518	908.376	908.374	908.381	371.64	371.157	371.897	3	1	2	http://metlin.scripps.edu/metabo_list.php?mass_min=907.23&mass_max=907.53	8.903e+06	9.47945e+06	6.3151e+06	5.95766e+06
276	M286T371	2.77053	-11.4468	0.0207712	286.075	286.072	286.079	371.313	371.27	371.469	4	2	2	http://metlin.scripps.edu/metabo_list.php?mass_min=284.92&mass_max=285.22	2.3858e+07	2.63697e+07	9.68798e+06	8.44131e+06
277	M705T362	2.66675	-7.0769	0.0207866	705.332	705.332	705.333	362.371	362.263	362.48	2	2	0	http://metlin.scripps.edu/metabo_list.php?mass_min=704.18&mass_max=704.48	2.30739e+06	2.64065e+06	1.06907e+06	786393
278	M877T373	3.27296	-7.61049	0.0208624	877.37	877.369	877.372	373.408	372.549	373.535	4	2	2	http://metlin.scripps.edu/metabo_list.php?mass_min=876.22&mass_max=876.52	2.64787e+07	2.37392e+07	9.50836e+06	5.83494e+06
279	M233T302	1.81158	7.43151	0.0209872	233.083	233.083	233.084	302.136	301.899	302.372	2	0	2	http://metlin.scripps.edu/metabo_list.php?mass_min=231.93&mass_max=232.23	826150	943922	1.67996e+06	1.52667e+06
280	M526T502	4.57219	-14.2571	0.0210398	526.219	526.219	526.219	502.395	502.253	502.471	4	2	2	http://metlin.scripps.edu/metabo_list.php?mass_min=525.07&mass_max=525.37	2.71074e+08	2.82414e+08	7.45933e+07	4.64621e+07
281	M329T371	2.58153	-11.3201	0.0210815	329.113	329.113	329.114	371.397	371.27	371.613	4	2	2	http://metlin.scripps.edu/metabo_list.php?mass_min=327.96&mass_max=328.26	1.98284e+07	2.18484e+07	8.57385e+06	7.57042e+06
282	M262T382	2.33121	-6.98057	0.0212181	262.107	262.107	262.108	382.26	381.002	384.196	4	2	2	http://metlin.scripps.edu/metabo_list.php?mass_min=260.96&mass_max=261.26	1.94905e+07	2.20762e+07	1.00194e+07	7.81114e+06
283	M339T390	2.23768	-6.76513	0.0212746	339.121	339.12	339.123	390.013	371.011	390.375	4	2	2	http://metlin.scripps.edu/metabo_list.php?mass_min=337.97&mass_max=338.27	2.59428e+07	2.9048e+07	1.39132e+07	1.06618e+07
284	M237T603	1.83746	-10.4595	0.0214141	237.137	237.135	237.138	603.425	603.026	603.824	2	2	0	http://metlin.scripps.edu/metabo_list.php?mass_min=235.99&mass_max=236.29	2.102e+07	2.18932e+07	1.25041e+07	1.08505e+07
285	M323T319	5.79698	7.95119	0.0214251	323.183	323.183	323.183	318.829	318.587	319.148	3	1	2	http://metlin.scripps.edu/metabo_list.php?mass_min=322.03&mass_max=322.33	2.14444e+07	6.36649e+07	2.613e+08	2.32078e+08
286	M236T603	8.10791	-29.33	0.0214727	236.13	236.129	236.131	603.276	602.684	603.837	4	2	2	http://metlin.scripps.edu/metabo_list.php?mass_min=234.98&mass_max=235.28	1.4015e+08	1.39812e+08	2.14453e+07	1.30842e+07
287	M684T328	4.10196	-29.0482	0.0215441	684.321	684.318	684.323	327.749	327.432	328.067	2	2	0	http://metlin.scripps.edu/metabo_list.php?mass_min=683.17&mass_max=683.47	2.42649e+06	2.43297e+06	655505	529164
288	M319T657	2.91369	7.70741	0.0216394	319.126	319.126	319.126	657.03	656.903	657.158	2	0	2	http://metlin.scripps.edu/metabo_list.php?mass_min=317.98&mass_max=318.28	775901	1.03751e+06	2.82509e+06	2.45863e+06
289	M413T661	2.53745	-11.5642	0.0217091	413.288	413.288	413.288	660.811	660.693	660.928	2	2	0	http://metlin.scripps.edu/metabo_list.php?mass_min=412.14&mass_max=412.44	1.10789e+07	1.15917e+07	5.00293e+06	3.93147e+06
290	M244T489	2.79995	-7.05107	0.0217346	244.134	244.134	244.135	489.033	488.794	489.15	4	2	2	http://metlin.scripps.edu/metabo_list.php?mass_min=242.98&mass_max=243.28	1.23197e+07	1.06921e+07	4.77121e+06	3.44744e+06
291	M254T317	2.62994	-9.7698	0.0217434	253.57	253.57	253.57	317.221	317.198	317.243	2	2	0	http://metlin.scripps.edu/metabo_list.php?mass_min=252.42&mass_max=252.72	1.92658e+06	2.15267e+06	838484	712598
292	M250T637	3.62543	-25.9537	0.0220053	250.17	250.152	250.177	637.224	636.202	638.554	4	2	2	http://metlin.scripps.edu/metabo_list.php?mass_min=249.02&mass_max=249.32	2.6302e+07	2.64963e+07	8.01182e+06	6.55149e+06
293	M457T578	11.333	-17.0258	0.0220747	457.22	457.22	457.22	577.604	577.604	577.604	1	1	0	http://metlin.scripps.edu/metabo_list.php?mass_min=456.07&mass_max=456.37	4.35777e+06	4.82606e+06	480326	330034
294	M283T124	2.681	-8.11856	0.0225155	283.154	283.154	283.154	123.703	123.703	123.703	1	1	0	http://metlin.scripps.edu/metabo_list.php?mass_min=282&mass_max=282.3	1.67996e+07	1.54364e+07	7.05356e+06	4.97033e+06
295	M527T502	4.62965	-14.5971	0.0225474	527.222	527.221	527.222	502.307	502.158	502.428	4	2	2	http://metlin.scripps.edu/metabo_list.php?mass_min=526.07&mass_max=526.37	8.29696e+07	8.61466e+07	2.25192e+07	1.40098e+07
296	M413T362	2.31815	-6.57616	0.0227917	413.189	413.189	413.189	362.29	360.967	363.089	4	2	2	http://metlin.scripps.edu/metabo_list.php?mass_min=412.04&mass_max=412.34	1.66171e+08	1.46246e+08	7.65057e+07	5.82642e+07
297	M511T563	5.79373	-18.5296	0.0229309	511.226	511.226	511.227	563.448	562.588	564.289	4	2	2	http://metlin.scripps.edu/metabo_list.php?mass_min=510.08&mass_max=510.38	4.0563e+08	4.15354e+08	8.85243e+07	5.3178e+07
298	M334T371	2.57288	-11.8311	0.0229378	334.092	334.092	334.092	371.313	371.27	371.469	4	2	2	http://metlin.scripps.edu/metabo_list.php?mass_min=332.94&mass_max=333.24	3.76903e+08	4.14146e+08	1.62149e+08	1.45307e+08
299	M585T898	1.12237	6.48387	0.0229767	585.244	585.242	585.244	898.053	897.9	898.443	4	2	2	http://metlin.scripps.edu/metabo_list.php?mass_min=584.09&mass_max=584.39	1.36039e+06	1.32475e+06	1.48885e+06	1.52487e+06
300	M542T388	4.76517	-15.6028	0.0229932	542.298	542.298	542.298	388.081	387.989	388.173	2	2	0	http://metlin.scripps.edu/metabo_list.php?mass_min=541.15&mass_max=541.45	5.21362e+06	5.38715e+06	1.36633e+06	858310
301	M245T371	2.57866	-10.7724	0.0231095	245.081	245.081	245.081	371.313	371.27	371.469	4	2	2	http://metlin.scripps.edu/metabo_list.php?mass_min=243.93&mass_max=244.23	1.46023e+08	1.61725e+08	6.35236e+07	5.58208e+07
302	M288T371	2.72519	-13.564	0.0231461	288.086	288.086	288.086	371.213	370.988	371.326	4	2	2	http://metlin.scripps.edu/metabo_list.php?mass_min=286.94&mass_max=287.24	8.88758e+07	9.69445e+07	3.56828e+07	3.25035e+07
303	M941T682	2.50394	-6.51363	0.0233237	940.566	940.566	940.567	682.495	682.392	682.596	4	2	2	http://metlin.scripps.edu/metabo_list.php?mass_min=939.42&mass_max=939.72	6.72446e+06	7.61212e+06	3.35263e+06	2.37298e+06
304	M244T706	1.11722	11.1177	0.0234364	244.225	244.225	244.225	705.524	705.524	705.524	1	0	1	http://metlin.scripps.edu/metabo_list.php?mass_min=243.07&mass_max=243.37	1.04264e+06	1.06271e+06	1.17133e+06	1.18081e+06
305	M372T714	1.73706	-6.39674	0.0236253	372.162	372.162	372.162	713.577	713.577	713.577	1	1	0	http://metlin.scripps.edu/metabo_list.php?mass_min=371.01&mass_max=371.31	2.39805e+06	2.63758e+06	1.56588e+06	1.33306e+06
306	M737T275	2.45778	-12.8903	0.0236592	737.281	737.28	737.281	274.667	274.648	274.686	2	2	0	http://metlin.scripps.edu/metabo_list.php?mass_min=736.13&mass_max=736.43	3.84829e+06	3.98433e+06	1.76031e+06	1.42656e+06
307	M731T372	1.32802	-10.7447	0.0237817	731.271	731.27	731.271	372.41	372.211	372.719	4	2	2	http://metlin.scripps.edu/metabo_list.php?mass_min=730.12&mass_max=730.42	8.49319e+06	8.32511e+06	6.15801e+06	6.50618e+06
308	M235T827	1.04265	17.7982	0.0238089	235.169	235.169	235.169	826.512	826.393	826.594	4	2	2	http://metlin.scripps.edu/metabo_list.php?mass_min=234.02&mass_max=234.32	6.61865e+07	6.61015e+07	6.88121e+07	6.91174e+07
309	M468T610	13.1428	24.6749	0.0238623	468.136	468.135	468.136	609.947	609.918	609.976	2	0	2	http://metlin.scripps.edu/metabo_list.php?mass_min=466.99&mass_max=467.29	642635	718220	9.27542e+06	8.61001e+06
310	M1010T711	4.11388	-7.56165	0.0238629	1009.51	1009.51	1009.51	710.749	710.749	710.749	1	1	0	http://metlin.scripps.edu/metabo_list.php?mass_min=1008.36&mass_max=1008.66	1.15172e+07	1.02868e+07	3.55143e+06	1.74868e+06
311	M227T371	2.56753	-10.9942	0.0238896	227.07	227.07	227.07	371.313	371.27	371.469	4	2	2	http://metlin.scripps.edu/metabo_list.php?mass_min=225.92&mass_max=226.22	9.27e+07	1.02506e+08	4.03246e+07	3.57042e+07
312	M270T371	2.6152	-11.0662	0.0240484	270.076	270.076	270.076	371.313	371.27	371.469	4	2	2	http://metlin.scripps.edu/metabo_list.php?mass_min=268.93&mass_max=269.23	1.69573e+08	1.87643e+08	7.25086e+07	6.40836e+07
313	M473T591	7.57163	6.53505	0.0241118	473.146	473.146	473.146	591.4	591.293	591.506	2	0	2	http://metlin.scripps.edu/metabo_list.php?mass_min=472&mass_max=472.3	108315	513310	2.59144e+06	2.11527e+06
314	M512T564	5.96019	-19.5475	0.0241335	512.228	512.228	512.228	564.114	563.939	564.289	2	2	0	http://metlin.scripps.edu/metabo_list.php?mass_min=511.08&mass_max=511.38	7.64623e+07	7.79579e+07	1.61553e+07	9.75332e+06
315	M285T496	11.7127	8.87023	0.024172	285.173	285.153	285.196	495.504	493.834	496.692	4	2	2	http://metlin.scripps.edu/metabo_list.php?mass_min=284.02&mass_max=284.32	1.88853e+06	7.54717e+06	6.02044e+07	5.0313e+07
316	M1026T566	12.2661	-11.1858	0.0241759	1026.46	1026.46	1026.46	566.138	564.944	567.331	2	2	0	http://metlin.scripps.edu/metabo_list.php?mass_min=1025.31&mass_max=1025.61	4.09966e+06	4.76062e+06	513176	209165
317	M498T682	2.73686	-7.17543	0.0242248	498.233	498.233	498.234	681.915	681.86	681.971	2	2	0	http://metlin.scripps.edu/metabo_list.php?mass_min=497.08&mass_max=497.38	8.13927e+06	9.02734e+06	3.75191e+06	2.52047e+06
318	M536T376	4.16214	25.4311	0.0243299	536.226	536.226	536.226	376.346	376.346	376.346	1	0	1	http://metlin.scripps.edu/metabo_list.php?mass_min=535.08&mass_max=535.38	513525	504956	2.1827e+06	2.05636e+06
319	M237T497	8.28579	9.42681	0.0243529	236.604	236.604	236.604	497.131	497.131	497.131	1	0	1	http://metlin.scripps.edu/metabo_list.php?mass_min=235.45&mass_max=235.75	256213	551751	3.62236e+06	3.07226e+06
320	M454T262	3.14366	12.8236	0.024373	454.195	454.194	454.195	261.612	261.532	261.693	2	0	2	http://metlin.scripps.edu/metabo_list.php?mass_min=453.04&mass_max=453.34	1.16043e+07	1.58673e+07	4.40345e+07	4.23268e+07
321	M1099T371_1	8.31198	-22.9052	0.0244016	1098.88	1098.88	1098.88	370.643	370.643	370.643	1	0	1	http://metlin.scripps.edu/metabo_list.php?mass_min=1097.73&mass_max=1098.03	7.00127e+06	7.5542e+06	834423	916721
322	M392T287	2.23309	-7.5539	0.0245876	392.147	392.132	392.158	287.273	285.939	288.1	4	2	2	http://metlin.scripps.edu/metabo_list.php?mass_min=391&mass_max=391.3	5.22516e+07	4.81679e+07	2.55344e+07	1.94344e+07
323	M470T708	2.69594	-6.32096	0.0246232	470.293	470.288	470.295	708.403	708.291	708.525	4	2	2	http://metlin.scripps.edu/metabo_list.php?mass_min=469.14&mass_max=469.44	7.96035e+07	9.10515e+07	3.79232e+07	2.53775e+07
324	M402T371	2.65729	-8.26958	0.0246336	402.143	402.143	402.143	370.616	370.052	371.27	4	2	2	http://metlin.scripps.edu/metabo_list.php?mass_min=400.99&mass_max=401.29	2.84771e+06	3.24035e+06	1.26455e+06	1.02653e+06
325	M410T320	3.06798	-8.12511	0.0246381	410.171	410.171	410.171	320.145	319.817	320.438	4	2	2	http://metlin.scripps.edu/metabo_list.php?mass_min=409.02&mass_max=409.32	3.80112e+08	3.29983e+08	1.31198e+08	1.00256e+08
326	M396T488	1.82613	-6.59258	0.0248519	396.183	396.181	396.184	487.938	486.911	488.838	4	2	2	http://metlin.scripps.edu/metabo_list.php?mass_min=395.03&mass_max=395.33	5.43414e+08	4.9855e+08	3.1313e+08	2.57456e+08
327	M423T569	5.92877	-17.7756	0.0248828	423.18	423.179	423.181	569.149	569.075	569.271	4	2	2	http://metlin.scripps.edu/metabo_list.php?mass_min=422.03&mass_max=422.33	2.51069e+07	2.57108e+07	5.43501e+06	3.13637e+06
328	M793T390	3.67251	-6.74521	0.024932	793.314	793.314	793.314	390.062	390.062	390.062	1	1	0	http://metlin.scripps.edu/metabo_list.php?mass_min=792.16&mass_max=792.46	7.01392e+06	5.90997e+06	2.18538e+06	1.33371e+06
329	M332T282	3.88754	-20.3433	0.0250133	332.08	332.079	332.08	282.138	281.687	282.589	2	2	0	http://metlin.scripps.edu/metabo_list.php?mass_min=330.93&mass_max=331.23	3.29886e+06	3.25195e+06	959808	725271
330	M403T412	4.88082	12.5753	0.0251328	403.14	403.14	403.14	412.47	412.408	412.532	2	0	2	http://metlin.scripps.edu/metabo_list.php?mass_min=401.99&mass_max=402.29	1.48682e+06	1.8708e+06	8.67516e+06	7.71274e+06
331	M309T283	3.62956	12.5057	0.0251836	309.005	308.993	309.023	283.058	282.715	283.217	4	2	2	http://metlin.scripps.edu/metabo_list.php?mass_min=307.85&mass_max=308.15	1.3838e+06	1.61856e+06	5.74163e+06	5.1556e+06
332	M934T714	2.539	-6.62027	0.0251934	934.494	934.494	934.494	714.11	713.891	714.336	4	2	2	http://metlin.scripps.edu/metabo_list.php?mass_min=933.34&mass_max=933.64	7.18037e+08	8.2927e+08	3.48576e+08	2.60839e+08
333	M935T714	2.53987	-6.74227	0.0252122	935.497	935.497	935.497	714.11	713.891	714.336	4	2	2	http://metlin.scripps.edu/metabo_list.php?mass_min=934.35&mass_max=934.65	4.19708e+08	4.8429e+08	2.02645e+08	1.53278e+08
334	M706T376	2.28382	-7.50122	0.0253154	706.321	706.32	706.322	375.873	372.585	378.756	4	2	2	http://metlin.scripps.edu/metabo_list.php?mass_min=705.17&mass_max=705.47	1.15149e+07	1.01602e+07	5.19351e+06	4.2972e+06
335	M581T734	3.05945	-10.3522	0.0254326	581.405	581.405	581.405	733.544	733.342	733.632	4	2	2	http://metlin.scripps.edu/metabo_list.php?mass_min=580.25&mass_max=580.55	2.66194e+07	2.51665e+07	9.98213e+06	6.94442e+06
336	M386T402	2.73211	-6.25474	0.0255177	386.254	386.254	386.254	402.03	401.922	402.137	2	2	0	http://metlin.scripps.edu/metabo_list.php?mass_min=385.1&mass_max=385.4	4.65877e+06	4.00138e+06	1.87573e+06	1.29404e+06
337	M510T563	5.80805	-18.924	0.0255471	510.224	510.224	510.224	563.448	562.588	564.289	4	2	2	http://metlin.scripps.edu/metabo_list.php?mass_min=509.07&mass_max=509.37	1.31234e+09	1.33779e+09	2.84694e+08	1.71592e+08
338	M466T411	2.25181	-8.25332	0.0257726	466.139	466.139	466.139	410.969	410.886	411.052	2	2	0	http://metlin.scripps.edu/metabo_list.php?mass_min=464.99&mass_max=465.29	5.92141e+06	5.52936e+06	2.87467e+06	2.21047e+06
339	M1309T682	8.32903	-7.34877	0.025785	1308.55	1308.55	1308.55	682.284	682.284	682.284	1	1	0	http://metlin.scripps.edu/metabo_list.php?mass_min=1307.4&mass_max=1307.7	4.46888e+06	3.65996e+06	758649	217315
340	M877T409	10.8694	-15.0745	0.0257949	877.338	877.338	877.339	408.795	408.634	408.894	4	2	2	http://metlin.scripps.edu/metabo_list.php?mass_min=876.19&mass_max=876.49	3.65872e+07	3.26145e+07	3.81435e+06	2.5523e+06
341	M700T331	4.36568	-12.1352	0.025801	700.321	700.32	700.322	331.338	330.681	331.994	2	2	0	http://metlin.scripps.edu/metabo_list.php?mass_min=699.17&mass_max=699.47	4.50409e+06	4.29411e+06	1.26666e+06	748652
342	M415T524	4.1548	-6.66516	0.0258441	415.288	415.288	415.288	524.028	524.013	524.042	2	2	0	http://metlin.scripps.edu/metabo_list.php?mass_min=414.14&mass_max=414.44	1.08202e+07	1.29768e+07	3.68522e+06	2.04237e+06
343	M220T711	2.34309	13.8731	0.0258899	220.178	220.178	220.178	710.977	710.866	711.087	2	0	2	http://metlin.scripps.edu/metabo_list.php?mass_min=219.03&mass_max=219.33	2.52921e+07	2.69629e+07	6.36066e+07	5.88315e+07
344	M715T940	6.16881	-6.76299	0.0259544	714.537	714.537	714.537	939.704	939.704	939.704	1	1	0	http://metlin.scripps.edu/metabo_list.php?mass_min=713.39&mass_max=713.69	1.05619e+06	1.22462e+06	298318	71415.2
345	M383T704	2.27969	-6.76719	0.0259761	382.772	382.772	382.772	704.065	704.065	704.065	1	0	1	http://metlin.scripps.edu/metabo_list.php?mass_min=381.62&mass_max=381.92	1.21522e+06	1.10083e+06	585149	430797
346	M264T466	3.88815	-7.72879	0.0260026	264.105	264.105	264.105	466.197	466.197	466.197	1	1	0	http://metlin.scripps.edu/metabo_list.php?mass_min=262.96&mass_max=263.26	1.2489e+06	1.47014e+06	419197	280116
347	M343T154	2.36559	-12.2889	0.0260067	343.148	343.148	343.148	153.967	153.956	153.979	2	2	0	http://metlin.scripps.edu/metabo_list.php?mass_min=342&mass_max=342.3	2.15243e+06	2.34892e+06	912357	990491
348	M405T658	2.26532	-9.47806	0.0260077	405.173	405.168	405.176	658.128	657.558	658.687	4	2	2	http://metlin.scripps.edu/metabo_list.php?mass_min=404.02&mass_max=404.32	3.07376e+07	3.414e+07	1.51917e+07	1.34477e+07
349	M451T409	2.74162	-14.2378	0.0260725	451.167	451.162	451.168	409.19	408.634	410.398	4	2	2	http://metlin.scripps.edu/metabo_list.php?mass_min=450.02&mass_max=450.32	2.77303e+07	2.69509e+07	1.11284e+07	8.81648e+06
350	M232T292	3.3672	-18.9536	0.0260916	232.141	232.141	232.141	292.128	292.128	292.128	1	1	0	http://metlin.scripps.edu/metabo_list.php?mass_min=230.99&mass_max=231.29	5.38445e+06	5.30104e+06	1.78043e+06	1.39297e+06
351	M876T373	3.30016	-8.13691	0.0261143	876.366	876.366	876.367	373.25	372.901	373.49	4	2	2	http://metlin.scripps.edu/metabo_list.php?mass_min=875.22&mass_max=875.52	5.4784e+07	5.01926e+07	1.97705e+07	1.20391e+07
352	M327T798	1.07136	6.05901	0.0261761	327.063	327.063	327.063	798.405	798.405	798.405	1	0	1	http://metlin.scripps.edu/metabo_list.php?mass_min=325.91&mass_max=326.21	2.87198e+06	2.82466e+06	3.07534e+06	3.02778e+06
353	M263T496	5.44391	-16.6072	0.0261968	263.165	263.147	263.186	496.283	495.749	497.443	4	2	2	http://metlin.scripps.edu/metabo_list.php?mass_min=262.01&mass_max=262.31	9.18356e+06	1.0098e+07	1.89546e+06	1.6464e+06
354	M747T646	2.84942	-6.31678	0.0263268	747.479	747.479	747.479	645.693	645.693	645.693	1	1	0	http://metlin.scripps.edu/metabo_list.php?mass_min=746.33&mass_max=746.63	3.20241e+06	3.75363e+06	1.4481e+06	993117
355	M363T580	3.14337	-7.74149	0.0263749	363.231	363.227	363.236	580.216	578.985	581.448	2	2	0	http://metlin.scripps.edu/metabo_list.php?mass_min=362.08&mass_max=362.38	2.76448e+06	3.03414e+06	1.13923e+06	705483
356	M548T600	3.37793	-7.54057	0.0263951	548.359	548.359	548.359	600.354	600.283	600.42	3	2	1	http://metlin.scripps.edu/metabo_list.php?mass_min=547.21&mass_max=547.51	3.50864e+06	4.10765e+06	1.3189e+06	935821
357	M820T489	1.46098	-6.0808	0.0264198	820.335	820.333	820.336	489.447	489.121	489.773	2	2	0	http://metlin.scripps.edu/metabo_list.php?mass_min=819.18&mass_max=819.48	3.66134e+06	3.92805e+06	2.74224e+06	2.4525e+06
358	M675T371	3.54587	-22.333	0.0264459	674.703	674.703	674.703	370.988	370.988	370.988	1	1	0	http://metlin.scripps.edu/metabo_list.php?mass_min=673.55&mass_max=673.85	3.7894e+06	4.03949e+06	1.11809e+06	1.0898e+06
359	M310T189	5.69459	-10.7364	0.0266048	310.199	310.199	310.2	188.708	188.324	189.052	4	2	2	http://metlin.scripps.edu/metabo_list.php?mass_min=309.05&mass_max=309.35	1.1655e+07	1.34118e+07	2.59416e+06	1.8077e+06
360	M272T371	2.6154	-10.4248	0.0266114	272.091	272.091	272.092	371.313	371.27	371.469	4	2	2	http://metlin.scripps.edu/metabo_list.php?mass_min=270.94&mass_max=271.24	1.68354e+08	1.87504e+08	7.2442e+07	6.36206e+07
361	M295T348	27.5489	-19.7519	0.0268525	295.116	295.116	295.116	347.595	347.595	347.595	1	1	0	http://metlin.scripps.edu/metabo_list.php?mass_min=293.97&mass_max=294.27	3.62971e+06	3.9958e+06	171566	105233
362	M347T319	8.0222	8.74231	0.026878	347.262	347.262	347.262	319.159	318.829	319.567	3	1	2	http://metlin.scripps.edu/metabo_list.php?mass_min=346.11&mass_max=346.41	543643	3.15462e+06	1.55425e+07	1.41257e+07
363	M466T653	1.88748	-14.4502	0.0268802	466.329	466.324	466.335	653.422	651.593	655.164	4	2	2	http://metlin.scripps.edu/metabo_list.php?mass_min=465.18&mass_max=465.48	9.59476e+06	9.78746e+06	5.43467e+06	4.83415e+06
364	M839T963	1.05794	-6.34872	0.0268856	838.553	838.552	838.553	963.147	963.029	963.271	4	2	2	http://metlin.scripps.edu/metabo_list.php?mass_min=837.4&mass_max=837.7	1.65944e+07	1.64168e+07	1.5713e+07	1.54904e+07
365	M316T371	2.65026	-10.6251	0.0269011	316.081	316.081	316.082	371.313	371.27	371.469	4	2	2	http://metlin.scripps.edu/metabo_list.php?mass_min=314.93&mass_max=315.23	4.99001e+09	5.55376e+09	2.11568e+09	1.86271e+09
366	M786T570	3.34515	-7.58503	0.0269665	786.393	786.393	786.393	569.919	569.919	569.919	1	1	0	http://metlin.scripps.edu/metabo_list.php?mass_min=785.24&mass_max=785.54	1.27554e+07	1.40716e+07	5.0605e+06	2.95916e+06
367	M233T431	2.401	-5.95299	0.0271555	233.154	233.154	233.154	430.566	430.268	431.567	4	2	2	http://metlin.scripps.edu/metabo_list.php?mass_min=232&mass_max=232.3	2.40865e+08	2.09133e+08	1.0903e+08	7.83918e+07
368	M894T373	2.63495	-6.09542	0.0271979	894.359	894.354	894.362	372.969	372.549	373.472	4	2	2	http://metlin.scripps.edu/metabo_list.php?mass_min=893.21&mass_max=893.51	4.89667e+06	5.71412e+06	2.36648e+06	1.66046e+06
369	M396T524	4.56376	-6.76458	0.0273235	396.275	396.275	396.275	524.028	524.013	524.042	2	2	0	http://metlin.scripps.edu/metabo_list.php?mass_min=395.12&mass_max=395.42	7.99369e+07	9.65295e+07	2.52422e+07	1.34247e+07
370	M283T348	2.63251	-7.89869	0.027641	283.163	283.163	283.163	348.267	348.267	348.267	1	1	0	http://metlin.scripps.edu/metabo_list.php?mass_min=282.01&mass_max=282.31	2.69605e+07	3.08706e+07	1.2138e+07	9.83008e+06
371	M911T610	620.312	22.9156	0.0277403	911.276	911.276	911.276	609.947	609.918	609.976	2	0	2	http://metlin.scripps.edu/metabo_list.php?mass_min=910.13&mass_max=910.43	7640.69	14877.6	7.28844e+06	6.67991e+06
372	M905T1017	1.11615	12.2403	0.0277749	904.623	904.621	904.624	1017.29	1017	1017.76	4	2	2	http://metlin.scripps.edu/metabo_list.php?mass_min=903.47&mass_max=903.77	833154	827580	934184	919444
373	M305T223	3.44202	-6.05324	0.0279818	305.136	305.136	305.136	222.638	222.065	222.898	4	2	2	http://metlin.scripps.edu/metabo_list.php?mass_min=303.99&mass_max=304.29	3.81282e+07	4.56264e+07	1.53343e+07	8.99867e+06
374	M447T690	2.13277	-11.3959	0.0279821	447.298	447.296	447.299	690.007	689.794	690.221	2	2	0	http://metlin.scripps.edu/metabo_list.php?mass_min=446.15&mass_max=446.45	3.07297e+07	3.18259e+07	1.60161e+07	1.33145e+07
375	M433T524	4.38103	-6.55374	0.0281558	433.299	433.299	433.299	524.028	524.013	524.042	2	2	0	http://metlin.scripps.edu/metabo_list.php?mass_min=432.15&mass_max=432.45	2.02798e+07	2.45497e+07	6.66836e+06	3.56428e+06
376	M557T767	1.0617	5.88429	0.0282173	557.372	557.372	557.372	767.395	767.395	767.395	1	0	1	http://metlin.scripps.edu/metabo_list.php?mass_min=556.22&mass_max=556.52	1.85934e+06	1.83323e+06	1.97449e+06	1.9459e+06
377	M456T314	1.92011	-12.1863	0.0282528	456.151	456.15	456.153	314.208	314.02	314.396	2	2	0	http://metlin.scripps.edu/metabo_list.php?mass_min=455&mass_max=455.3	1.18936e+07	1.22262e+07	6.72498e+06	5.83674e+06
378	M319T524	4.07767	-7.15335	0.0282855	319.216	319.216	319.216	523.541	523.362	523.72	2	2	0	http://metlin.scripps.edu/metabo_list.php?mass_min=318.07&mass_max=318.37	5.4976e+06	6.56589e+06	1.82522e+06	1.13322e+06
379	M938T715	2.59062	-6.13064	0.0283146	937.504	937.504	937.505	714.542	714.285	714.651	4	2	2	http://metlin.scripps.edu/metabo_list.php?mass_min=936.35&mass_max=936.65	3.70793e+07	4.33401e+07	1.80546e+07	1.2988e+07
380	M367T628	4.15492	6.03626	0.028351	367.137	367.137	367.137	628.487	622.196	634.779	2	1	1	http://metlin.scripps.edu/metabo_list.php?mass_min=365.99&mass_max=366.29	5.89906e+06	1.18503e+07	4.04318e+07	3.33153e+07
381	M467T569	3.73283	-11.019	0.028363	467.162	467.162	467.163	568.914	568.878	568.949	2	2	0	http://metlin.scripps.edu/metabo_list.php?mass_min=466.01&mass_max=466.31	4.2845e+06	4.07136e+06	1.37555e+06	862929
382	M757T469	3.93638	-9.89419	0.0284356	757.361	757.36	757.361	468.511	468.127	468.896	2	2	0	http://metlin.scripps.edu/metabo_list.php?mass_min=756.21&mass_max=756.51	2.97858e+07	2.79574e+07	9.31001e+06	5.35911e+06
383	M850T488	2.90552	-5.92304	0.0284808	850.322	850.322	850.323	488.356	488.215	488.498	2	2	0	http://metlin.scripps.edu/metabo_list.php?mass_min=849.17&mass_max=849.47	8.10721e+06	6.85988e+06	3.1212e+06	2.03006e+06
384	M469T709	2.77287	-5.7873	0.0285833	469.294	469.294	469.294	708.618	708.525	708.827	4	2	2	http://metlin.scripps.edu/metabo_list.php?mass_min=468.14&mass_max=468.44	2.36141e+08	2.76196e+08	1.1238e+08	7.23877e+07
385	M335T371	2.60136	-10.4292	0.0285938	335.099	335.098	335.101	371.285	371.157	371.326	4	2	2	http://metlin.scripps.edu/metabo_list.php?mass_min=333.95&mass_max=334.25	6.95402e+07	7.74921e+07	2.99989e+07	2.65224e+07
386	M317T371	2.6358	-10.2655	0.0286369	317.084	317.084	317.084	371.313	371.27	371.469	4	2	2	http://metlin.scripps.edu/metabo_list.php?mass_min=315.93&mass_max=316.23	8.78181e+08	9.80913e+08	3.75457e+08	3.29869e+08
387	M620T818	2.81509	-6.204	0.0287348	620.441	620.419	620.459	818.42	809.32	827.36	4	2	2	http://metlin.scripps.edu/metabo_list.php?mass_min=619.29&mass_max=619.59	7.4631e+06	8.79608e+06	3.40713e+06	2.3686e+06
388	M366T631	4.13672	5.96016	0.0287457	366.134	366.134	366.134	630.822	622.538	634.779	4	2	2	http://metlin.scripps.edu/metabo_list.php?mass_min=364.98&mass_max=365.28	2.54435e+07	5.16847e+07	1.75013e+08	1.44045e+08
389	M293T564	3.91026	-14.6943	0.0287755	293.115	293.115	293.115	563.606	563.603	563.61	2	2	0	http://metlin.scripps.edu/metabo_list.php?mass_min=291.96&mass_max=292.26	3.54384e+06	3.64519e+06	1.09412e+06	744384
390	M629T392	14.4624	-12.2991	0.0288099	629.23	629.23	629.23	391.762	391.762	391.762	1	1	0	http://metlin.scripps.edu/metabo_list.php?mass_min=628.08&mass_max=628.38	2.83009e+06	2.45427e+06	251104	114282
391	M384T333	2.3836	-6.59339	0.0288207	384.192	384.192	384.192	332.724	331.994	333.427	4	2	2	http://metlin.scripps.edu/metabo_list.php?mass_min=383.04&mass_max=383.34	1.79397e+08	2.0718e+08	9.09197e+07	7.12624e+07
392	M316T197	3.42977	-8.55342	0.0288485	316.248	316.248	316.248	197.331	196.944	197.719	2	2	0	http://metlin.scripps.edu/metabo_list.php?mass_min=315.1&mass_max=315.4	2.68424e+07	2.31806e+07	8.26163e+06	6.32332e+06
393	M445T663	8.11591	13.5372	0.0288717	445.155	445.154	445.155	662.506	662.458	662.554	2	0	2	http://metlin.scripps.edu/metabo_list.php?mass_min=444&mass_max=444.3	3.29423e+06	2.37725e+06	2.44329e+07	2.15962e+07
394	M575T667	2.80741	-9.36873	0.0289287	574.9	574.9	574.9	667.173	667.074	667.271	2	2	0	http://metlin.scripps.edu/metabo_list.php?mass_min=573.75&mass_max=574.05	6.56488e+06	6.18406e+06	2.66508e+06	1.8761e+06
395	M378T264	1.76325	6.52584	0.0290737	378.128	378.127	378.129	264.302	264.054	264.55	2	0	2	http://metlin.scripps.edu/metabo_list.php?mass_min=376.98&mass_max=377.28	1.23009e+06	1.48907e+06	2.48957e+06	2.30498e+06
396	M686T337	2.94905	-5.82234	0.0290747	686.309	686.266	686.339	337.156	334.339	342.957	4	2	2	http://metlin.scripps.edu/metabo_list.php?mass_min=685.16&mass_max=685.46	3.6397e+06	4.23541e+06	1.66845e+06	1.00194e+06
397	M541T443	3.73134	5.76584	0.029121	541.313	541.313	541.313	443.002	443.002	443.002	1	0	1	http://metlin.scripps.edu/metabo_list.php?mass_min=540.16&mass_max=540.46	675835	1.32026e+06	3.37807e+06	4.07004e+06
398	M318T706	2.50872	-11.3984	0.0291486	318.183	318.177	318.197	706.325	704.717	707.517	4	2	2	http://metlin.scripps.edu/metabo_list.php?mass_min=317.03&mass_max=317.33	1.59168e+07	1.75611e+07	6.99485e+06	6.34978e+06
399	M987T682	3.83927	-5.74115	0.0291607	987.45	987.45	987.45	682.172	682.172	682.172	1	1	0	http://metlin.scripps.edu/metabo_list.php?mass_min=986.3&mass_max=986.6	2.74921e+06	3.28636e+06	1.06706e+06	505002
400	M317T198	3.45965	-8.27678	0.029194	317.252	317.252	317.252	197.863	197.299	198.427	2	2	0	http://metlin.scripps.edu/metabo_list.php?mass_min=316.1&mass_max=316.4	5.11799e+06	4.39949e+06	1.5705e+06	1.1805e+06
401	M323T126	3.78529	-7.31602	0.0292174	323.147	323.139	323.147	125.981	124.912	126.962	4	2	2	http://metlin.scripps.edu/metabo_list.php?mass_min=322&mass_max=322.3	1.98958e+07	1.67591e+07	5.81032e+06	3.87319e+06
402	M234T85	1.81254	5.8657	0.029342	233.973	233.968	233.978	84.5781	82.0805	87.4587	4	2	2	http://metlin.scripps.edu/metabo_list.php?mass_min=232.82&mass_max=233.12	742054	600931	1.27771e+06	1.1565e+06
403	M220T344	5.79336	-16.5606	0.0293692	220.096	220.096	220.096	344.445	344.307	344.583	2	2	0	http://metlin.scripps.edu/metabo_list.php?mass_min=218.95&mass_max=219.25	3.19029e+06	3.51701e+06	616137	541620
404	M458T491	2.08475	-15.5287	0.0294567	458.236	458.236	458.236	490.71	490.71	490.71	1	1	0	http://metlin.scripps.edu/metabo_list.php?mass_min=457.09&mass_max=457.39	3.04383e+06	2.85246e+06	1.38959e+06	1.4387e+06
405	M532T372	1.28815	-21.1799	0.0295087	532.089	532.089	532.089	371.782	371.583	372.094	4	2	2	http://metlin.scripps.edu/metabo_list.php?mass_min=530.94&mass_max=531.24	3.49278e+06	3.49688e+06	2.74992e+06	2.67621e+06
406	M284T495	6.45358	5.74874	0.0295532	284.169	284.157	284.191	495.173	494.182	496.062	4	2	2	http://metlin.scripps.edu/metabo_list.php?mass_min=283.02&mass_max=283.32	1.71648e+07	9.80366e+07	4.08484e+08	3.34977e+08
407	M526T749	3.27021	-5.74507	0.0295681	525.831	525.83	525.831	749.003	748.845	749.161	2	2	0	http://metlin.scripps.edu/metabo_list.php?mass_min=524.68&mass_max=524.98	520966	442581	190369	104276
408	M250T194	9.5772	-15.4367	0.0296525	250.071	250.071	250.071	193.803	193.757	193.849	2	2	0	http://metlin.scripps.edu/metabo_list.php?mass_min=248.92&mass_max=249.22	1.95404e+06	2.18673e+06	246038	186318
409	M301T524	4.49457	-6.28097	0.0296834	301.216	301.216	301.216	524.339	524.339	524.339	1	1	0	http://metlin.scripps.edu/metabo_list.php?mass_min=300.07&mass_max=300.37	3.5392e+06	4.32097e+06	1.16404e+06	584774
410	M688T875	1.05367	11.1631	0.0297712	688.333	688.333	688.333	875.32	875.151	875.489	2	0	2	http://metlin.scripps.edu/metabo_list.php?mass_min=687.18&mass_max=687.48	953610	945118	1.00199e+06	998639
411	M928T502	4.72067	-11.1614	0.0298432	928.393	928.393	928.393	502.341	502.253	502.428	2	2	0	http://metlin.scripps.edu/metabo_list.php?mass_min=927.24&mass_max=927.54	2.24264e+07	1.96608e+07	5.00189e+06	3.91362e+06
412	M458T351	2.47905	-10.4695	0.0298534	458.212	458.21	458.214	351.114	350.639	351.588	2	2	0	http://metlin.scripps.edu/metabo_list.php?mass_min=457.06&mass_max=457.36	5.46425e+06	5.71151e+06	2.54749e+06	1.96058e+06
413	M398T255	2.21224	-7.80271	0.0299456	398.171	398.171	398.171	255.231	255.196	255.267	2	2	0	http://metlin.scripps.edu/metabo_list.php?mass_min=397.02&mass_max=397.32	3.4254e+07	3.6712e+07	1.82072e+07	1.38717e+07
414	M583T85	1.58791	-10.8119	0.0300333	582.862	582.862	582.863	85.1787	85.0962	85.248	4	2	2	http://metlin.scripps.edu/metabo_list.php?mass_min=581.71&mass_max=582.01	3.36591e+06	3.28044e+06	2.19827e+06	1.98733e+06
415	M241T489	2.27415	-6.26899	0.0300756	241.057	241.051	241.061	488.877	488.794	489.15	4	2	2	http://metlin.scripps.edu/metabo_list.php?mass_min=239.91&mass_max=240.21	1.2371e+07	1.07087e+07	5.68505e+06	4.46369e+06
416	M346T123	2.78364	-20.9987	0.0302076	346.223	346.223	346.223	123.13	123.026	123.703	4	2	2	http://metlin.scripps.edu/metabo_list.php?mass_min=345.07&mass_max=345.37	1.04875e+07	1.05018e+07	4.09027e+06	3.44996e+06
417	M1133T501	18.1873	10.6671	0.0303078	1132.56	1132.56	1132.56	500.851	500.794	500.908	2	0	2	http://metlin.scripps.edu/metabo_list.php?mass_min=1131.41&mass_max=1131.71	19531.4	80300.1	982297	833365
418	M528T502	5.05925	-16.4124	0.0303418	528.224	528.224	528.224	502.498	502.428	502.567	2	2	0	http://metlin.scripps.edu/metabo_list.php?mass_min=527.07&mass_max=527.37	1.55089e+07	1.58353e+07	3.84628e+06	2.34915e+06
419	M318T371	2.68358	-9.93065	0.0303866	318.086	318.086	318.086	371.313	371.27	371.469	4	2	2	http://metlin.scripps.edu/metabo_list.php?mass_min=316.94&mass_max=317.24	1.10383e+08	1.23938e+08	4.66339e+07	4.06826e+07
420	M755T469	4.19981	-9.71347	0.0304135	755.355	755.354	755.356	468.979	468.567	469.214	4	2	2	http://metlin.scripps.edu/metabo_list.php?mass_min=754.2&mass_max=754.5	2.1397e+08	2.00652e+08	6.41966e+07	3.45273e+07
421	M372T569	3.95162	-10.7587	0.0305236	372.098	372.096	372.103	569.143	568.743	569.594	4	2	2	http://metlin.scripps.edu/metabo_list.php?mass_min=370.95&mass_max=371.25	6.95787e+06	6.60667e+06	2.15323e+06	1.27942e+06
422	M432T524	4.28445	-6.52467	0.0305358	432.295	432.295	432.295	524.028	524.013	524.042	2	2	0	http://metlin.scripps.edu/metabo_list.php?mass_min=431.14&mass_max=431.44	8.27955e+07	1.00558e+08	2.74921e+07	1.5303e+07
423	M736T492	9.37764	6.71593	0.0305407	736.339	736.337	736.34	491.703	491.632	491.775	2	0	2	http://metlin.scripps.edu/metabo_list.php?mass_min=735.19&mass_max=735.49	128201	694017	4.28296e+06	3.4275e+06
424	M709T320	2.3291	-6.82231	0.0306341	709.331	709.33	709.332	320.095	319.751	320.438	2	2	0	http://metlin.scripps.edu/metabo_list.php?mass_min=708.18&mass_max=708.48	4.37434e+06	5.03499e+06	2.23383e+06	1.80607e+06
425	M480T469	2.11589	-6.22331	0.0306655	480.143	480.143	480.143	468.578	468.578	468.578	1	1	0	http://metlin.scripps.edu/metabo_list.php?mass_min=478.99&mass_max=479.29	5.76983e+06	5.22034e+06	2.97304e+06	2.22107e+06
426	M614T371	5.53315	-12.5025	0.030672	614.146	614.146	614.147	370.761	370.676	370.845	2	2	0	http://metlin.scripps.edu/metabo_list.php?mass_min=613&mass_max=613.3	1.17377e+06	1.32927e+06	252287	200085
427	M371T836	4.65424	-17.9021	0.0306741	371.221	371.221	371.221	835.783	835.783	835.784	2	2	0	http://metlin.scripps.edu/metabo_list.php?mass_min=370.07&mass_max=370.37	1.25997e+07	1.37393e+07	2.92398e+06	2.73517e+06
428	M727T395	3.50193	-5.97376	0.0307004	727.275	727.275	727.276	394.546	393.837	395.256	2	2	0	http://metlin.scripps.edu/metabo_list.php?mass_min=726.13&mass_max=726.43	5.14055e+06	4.25502e+06	1.68735e+06	995614
429	M341T576	3.0167	-5.98005	0.0307804	341.142	341.135	341.145	576.31	567.656	584.22	4	2	2	http://metlin.scripps.edu/metabo_list.php?mass_min=339.99&mass_max=340.29	1.7135e+07	1.966e+07	7.7221e+06	4.47499e+06
430	M897T365	2.48755	-5.60181	0.0308438	897.322	897.322	897.322	364.778	364.778	364.778	1	0	1	http://metlin.scripps.edu/metabo_list.php?mass_min=896.17&mass_max=896.47	5.51727e+06	4.77181e+06	2.47144e+06	1.66478e+06
431	M783T704	2.81436	-5.78616	0.0308949	782.565	782.564	782.566	704.065	704.029	704.439	3	2	1	http://metlin.scripps.edu/metabo_list.php?mass_min=781.41&mass_max=781.71	2.75947e+06	2.39319e+06	1.13646e+06	694388
432	M537T328	1.88858	-20.4606	0.0309731	537.146	537.142	537.156	328.354	328.317	330.334	4	2	2	http://metlin.scripps.edu/metabo_list.php?mass_min=536&mass_max=536.3	2.78814e+06	2.78484e+06	1.5395e+06	1.41139e+06
433	M249T409	6.77481	-10.1908	0.0310202	249.149	249.149	249.149	408.691	407.954	410.07	4	2	2	http://metlin.scripps.edu/metabo_list.php?mass_min=248&mass_max=248.3	1.44845e+08	1.69048e+08	2.82546e+07	1.80778e+07
434	M522T827	2.92029	-5.59458	0.0310246	522.375	522.374	522.375	826.835	826.716	826.911	4	2	2	http://metlin.scripps.edu/metabo_list.php?mass_min=521.22&mass_max=521.52	1.57336e+08	1.87203e+08	7.2664e+07	4.53171e+07
435	M434T331	2.1282	-7.17574	0.0310743	434.168	434.168	434.168	330.676	330.323	331.336	4	2	2	http://metlin.scripps.edu/metabo_list.php?mass_min=433.02&mass_max=433.32	6.39399e+07	5.6337e+07	3.05574e+07	2.59584e+07
436	M203T854	8.78425	10.8926	0.0311767	203.179	203.179	203.179	853.84	853.84	853.84	1	0	1	http://metlin.scripps.edu/metabo_list.php?mass_min=202.03&mass_max=202.33	187289	318419	2.05275e+06	2.38952e+06
437	M937T714	2.58018	-6.37622	0.0311928	936.5	936.5	936.5	714.227	713.97	714.336	4	2	2	http://metlin.scripps.edu/metabo_list.php?mass_min=935.35&mass_max=935.65	1.44702e+08	1.69468e+08	6.95011e+07	5.22619e+07
438	M234T430	2.39306	-5.57832	0.0311943	234.157	234.157	234.157	430.405	430.268	431.242	4	2	2	http://metlin.scripps.edu/metabo_list.php?mass_min=233.01&mass_max=233.31	3.99444e+07	3.42355e+07	1.81129e+07	1.2885e+07
439	M332T523	3.0619	-6.6793	0.0312218	332.258	332.258	332.258	522.569	522.428	522.71	2	2	0	http://metlin.scripps.edu/metabo_list.php?mass_min=331.11&mass_max=331.41	1.56061e+06	1.74316e+06	678800	400195
440	M873T374	2.8118	-6.50143	0.0313787	873.328	873.328	873.328	374.433	374.433	374.433	1	1	0	http://metlin.scripps.edu/metabo_list.php?mass_min=872.18&mass_max=872.48	9.63983e+06	8.62666e+06	3.99835e+06	2.49801e+06
441	M543T468	136.081	19.8451	0.031392	543.084	543.084	543.084	467.758	467.599	467.917	2	0	2	http://metlin.scripps.edu/metabo_list.php?mass_min=541.93&mass_max=542.23	11130.2	4605.21	1.1241e+06	1.01719e+06
442	M492T834	2.94717	-5.61829	0.031435	491.847	491.847	491.848	833.619	833.562	833.826	4	2	2	http://metlin.scripps.edu/metabo_list.php?mass_min=490.7&mass_max=491	3.13459e+07	3.66116e+07	1.4535e+07	8.52358e+06
443	M311T197	2.96647	9.5852	0.0319671	311.126	311.126	311.126	196.736	196.53	196.941	2	0	2	http://metlin.scripps.edu/metabo_list.php?mass_min=309.98&mass_max=310.28	1.70631e+06	2.49596e+06	6.40597e+06	6.05997e+06
444	M222T432	8.61267	-14.1777	0.0320223	222.113	222.112	222.116	431.926	431.242	432.882	4	2	2	http://metlin.scripps.edu/metabo_list.php?mass_min=220.96&mass_max=221.26	3.76213e+07	3.33441e+07	3.55431e+06	4.68534e+06
445	M943T374	37.5995	19.6937	0.0322382	943.311	943.311	943.311	374.297	374.172	374.423	2	0	2	http://metlin.scripps.edu/metabo_list.php?mass_min=942.16&mass_max=942.46	2.17207e+06	2.02934e+06	8.28888e+07	7.50821e+07
446	M440T389	2.54668	-6.84922	0.0322821	440.18	440.18	440.181	388.862	388.806	388.937	4	2	2	http://metlin.scripps.edu/metabo_list.php?mass_min=439.03&mass_max=439.33	5.55721e+07	6.10256e+07	2.72839e+07	1.85003e+07
447	M214T798	1.07662	6.36597	0.0323551	214.216	214.216	214.216	797.672	797.462	797.853	4	2	2	http://metlin.scripps.edu/metabo_list.php?mass_min=213.07&mass_max=213.37	1.36941e+07	1.35103e+07	1.45089e+07	1.47799e+07
448	M287T370	2.59558	-12.2255	0.0323596	287.095	287.089	287.099	370.22	369.114	370.957	3	2	1	http://metlin.scripps.edu/metabo_list.php?mass_min=285.94&mass_max=286.24	1.07269e+07	9.74815e+06	4.10389e+06	3.78455e+06
449	M540T314	1.84985	-5.50975	0.0323858	540.098	540.098	540.098	313.723	313.694	313.751	2	2	0	http://metlin.scripps.edu/metabo_list.php?mass_min=538.95&mass_max=539.25	1.53151e+06	1.71094e+06	977529	775294
450	M273T371	2.50015	-9.76101	0.0323924	273.078	273.076	273.08	371.155	370.957	371.469	4	2	2	http://metlin.scripps.edu/metabo_list.php?mass_min=271.93&mass_max=272.23	3.68982e+08	4.1323e+08	1.65842e+08	1.47023e+08
451	M271T371	2.44703	-8.37509	0.0325068	271.081	271.079	271.083	371.313	371.27	371.469	4	2	2	http://metlin.scripps.edu/metabo_list.php?mass_min=269.93&mass_max=270.23	2.75929e+07	3.13161e+07	1.29639e+07	1.11097e+07
452	M944T374	41.2127	19.3603	0.0326296	944.314	944.314	944.314	374.297	374.172	374.423	2	0	2	http://metlin.scripps.edu/metabo_list.php?mass_min=943.16&mass_max=943.46	1.116e+06	964300	4.50265e+07	4.07082e+07
453	M257T372	2.57233	-9.39568	0.0326597	257.068	257.068	257.068	371.526	371.3	371.64	4	2	2	http://metlin.scripps.edu/metabo_list.php?mass_min=255.92&mass_max=256.22	4.71028e+07	5.30673e+07	2.07833e+07	1.81582e+07
454	M503T388	1.48216	-6.96849	0.0326927	503.244	503.235	503.25	387.64	387.531	388.195	4	2	2	http://metlin.scripps.edu/metabo_list.php?mass_min=502.09&mass_max=502.39	9.01963e+06	8.59484e+06	6.2942e+06	5.59013e+06
455	M501T195	107.529	18.7898	0.0327442	501.231	501.231	501.231	195.139	195.139	195.139	1	0	1	http://metlin.scripps.edu/metabo_list.php?mass_min=500.08&mass_max=500.38	32307.8	12562.5	2.53925e+06	2.28562e+06
456	M350T371	2.59326	-8.81928	0.0327694	350.112	350.111	350.113	370.984	370.676	371.157	4	2	2	http://metlin.scripps.edu/metabo_list.php?mass_min=348.96&mass_max=349.26	1.81095e+07	2.05474e+07	8.02533e+06	6.88137e+06
457	M897T848	3.38019	-5.38769	0.0327725	896.642	896.642	896.642	847.873	847.579	848.078	4	2	2	http://metlin.scripps.edu/metabo_list.php?mass_min=895.49&mass_max=895.79	5.09813e+06	6.13115e+06	2.1823e+06	1.13979e+06
458	M567T813	3.50658	-7.11704	0.0327862	567.404	567.404	567.405	813.278	813.174	813.452	4	2	2	http://metlin.scripps.edu/metabo_list.php?mass_min=566.25&mass_max=566.55	8.08295e+06	9.61518e+06	2.97412e+06	2.073e+06
459	M445T467	17.5177	18.3555	0.0331043	445.175	445.168	445.192	466.572	464.637	467.277	4	2	2	http://metlin.scripps.edu/metabo_list.php?mass_min=444.03&mass_max=444.33	7.70297e+06	6.53356e+06	1.31075e+08	1.18317e+08
460	M301T223	2.4101	-10.4381	0.0332016	301.177	301.177	301.177	222.606	222.472	222.741	2	2	0	http://metlin.scripps.edu/metabo_list.php?mass_min=300.03&mass_max=300.33	1.04451e+07	1.0876e+07	4.98062e+06	3.86592e+06
461	M380T694	5.27407	5.77714	0.0332041	380.149	380.149	380.149	694.211	694.211	694.211	1	0	1	http://metlin.scripps.edu/metabo_list.php?mass_min=379&mass_max=379.3	616839	1.62771e+06	6.57767e+06	5.26023e+06
462	M551T555	3.74898	-13.2946	0.0332326	551.219	551.219	551.219	555.093	553.623	555.481	3	2	1	http://metlin.scripps.edu/metabo_list.php?mass_min=550.07&mass_max=550.37	2.11069e+07	2.04904e+07	6.65278e+06	4.44286e+06
463	M589T807	3.82112	-7.31859	0.0332371	588.915	588.915	588.915	806.666	806.552	806.78	2	2	0	http://metlin.scripps.edu/metabo_list.php?mass_min=587.77&mass_max=588.07	9.26469e+06	1.10488e+07	3.16208e+06	2.15403e+06
464	M329T275	1.51604	15.7806	0.0333563	329.197	329.197	329.197	274.873	274.686	275.197	4	2	2	http://metlin.scripps.edu/metabo_list.php?mass_min=328.05&mass_max=328.35	4.4319e+07	4.72596e+07	6.97017e+07	6.91348e+07
465	M873T371	3.26398	-15.4578	0.0333995	872.805	872.805	872.805	370.984	370.957	371.011	2	0	2	http://metlin.scripps.edu/metabo_list.php?mass_min=871.65&mass_max=871.95	6.90802e+06	7.03267e+06	2.44204e+06	1.82903e+06
466	M1098T371_2	8.3013	-16.86	0.0334187	1098.38	1098.38	1098.38	370.697	370.676	370.845	3	2	1	http://metlin.scripps.edu/metabo_list.php?mass_min=1097.23&mass_max=1097.53	9.77856e+06	1.08421e+07	1.16119e+06	1.32284e+06
467	M735T488	6.13833	5.36932	0.0334571	735.349	735.349	735.349	488.399	488.005	488.794	2	0	2	http://metlin.scripps.edu/metabo_list.php?mass_min=734.2&mass_max=734.5	456755	2.14186e+06	8.89e+06	7.06114e+06
468	M392T371	1.85346	-14.4409	0.0335777	392.083	392.083	392.083	371.3	371.3	371.3	1	1	0	http://metlin.scripps.edu/metabo_list.php?mass_min=390.93&mass_max=391.23	4.08024e+06	4.34162e+06	2.30273e+06	2.24113e+06
469	M942T682	2.63948	-6.42228	0.0336385	941.573	941.573	941.573	682.484	682.194	682.596	3	2	1	http://metlin.scripps.edu/metabo_list.php?mass_min=940.42&mass_max=940.72	4.1444e+06	4.60609e+06	2.01226e+06	1.30298e+06
470	M566T667	3.08028	-14.3143	0.0336581	565.885	565.884	565.885	667.173	667.074	667.271	2	2	0	http://metlin.scripps.edu/metabo_list.php?mass_min=564.73&mass_max=565.03	1.44526e+06	1.41392e+06	529712	398508
471	M755T711	3.83211	-5.59142	0.0337007	755.453	755.453	755.453	710.633	710.516	710.749	2	2	0	http://metlin.scripps.edu/metabo_list.php?mass_min=754.3&mass_max=754.6	3.20234e+06	3.78106e+06	1.27071e+06	551630
472	M330T452	9.21534	10.2683	0.0337632	330.174	330.174	330.174	452.42	452.42	452.42	1	0	1	http://metlin.scripps.edu/metabo_list.php?mass_min=329.02&mass_max=329.32	232284	421523	2.7687e+06	3.25636e+06
473	M566T334	6.39915	-18.0914	0.0337921	566.294	566.294	566.294	333.656	333.656	333.656	1	1	0	http://metlin.scripps.edu/metabo_list.php?mass_min=565.14&mass_max=565.44	2.88616e+06	3.16745e+06	460972	485031
474	M360T524	4.92251	-6.62685	0.0338462	360.253	360.252	360.253	524.001	523.616	524.042	4	2	2	http://metlin.scripps.edu/metabo_list.php?mass_min=359.1&mass_max=359.4	9.91901e+06	1.21729e+07	2.94694e+06	1.541e+06
475	M456T679	2.24431	-5.29434	0.0338866	456.257	456.207	456.271	678.504	669.225	688.176	4	2	2	http://metlin.scripps.edu/metabo_list.php?mass_min=455.11&mass_max=455.41	9.68257e+07	1.122e+08	3.87774e+07	5.43585e+07
476	M344T321	2.13905	6.18357	0.0339549	344.243	344.149	344.243	321.139	312.702	321.201	3	1	2	http://metlin.scripps.edu/metabo_list.php?mass_min=343.09&mass_max=343.39	2.71783e+06	2.20826e+06	5.64399e+06	4.89316e+06
477	M676T280	2.24889	5.53954	0.0339769	676.28	676.206	676.356	279.784	273.93	285.936	4	2	2	http://metlin.scripps.edu/metabo_list.php?mass_min=675.13&mass_max=675.43	2.37359e+06	3.16098e+06	6.7073e+06	5.73935e+06
478	M444T467	24.3386	18.5936	0.0340017	444.167	444.166	444.27	467.277	438.113	467.489	5	2	2	http://metlin.scripps.edu/metabo_list.php?mass_min=443.02&mass_max=443.32	1.77369e+07	1.92735e+07	4.73605e+08	4.27175e+08
479	M404T413	5.64692	16.0027	0.0340308	404.144	404.144	404.144	412.532	412.532	412.532	1	0	1	http://metlin.scripps.edu/metabo_list.php?mass_min=402.99&mass_max=403.29	321471	355134	2.00715e+06	1.81358e+06
480	M756T469	4.08889	-9.64918	0.0340581	756.355	756.352	756.358	469.207	469.08	469.214	4	2	2	http://metlin.scripps.edu/metabo_list.php?mass_min=755.21&mass_max=755.51	1.09747e+08	1.03374e+08	3.37711e+07	1.83507e+07
481	M394T489	2.27831	-5.69692	0.0341137	394.176	394.176	394.176	489.033	488.794	489.15	4	2	2	http://metlin.scripps.edu/metabo_list.php?mass_min=393.03&mass_max=393.33	1.47238e+10	1.25882e+10	6.81168e+09	5.17614e+09
482	M506T826	3.1418	-5.42923	0.0341631	505.85	505.85	505.85	826.462	826.462	826.462	1	0	1	http://metlin.scripps.edu/metabo_list.php?mass_min=504.7&mass_max=505	2.11317e+06	2.48701e+06	952255	511933
483	M238T351	4.66129	-11.5297	0.0341816	238.109	238.107	238.11	350.8	349.621	352.503	4	2	2	http://metlin.scripps.edu/metabo_list.php?mass_min=236.96&mass_max=237.26	8.92001e+07	1.01532e+08	2.25067e+07	1.84115e+07
484	M336T489	2.31505	-5.50907	0.0342035	336.134	336.134	336.134	489.114	488.944	489.15	4	2	2	http://metlin.scripps.edu/metabo_list.php?mass_min=334.98&mass_max=335.28	5.93538e+07	5.05758e+07	2.7328e+07	2.01567e+07
485	M635T496	16.556	7.81591	0.0342111	635.386	635.386	635.386	495.812	495.748	495.875	2	0	2	http://metlin.scripps.edu/metabo_list.php?mass_min=634.24&mass_max=634.54	21798.9	478043	4.57972e+06	3.69567e+06
486	M311T361	2.91875	-15.4428	0.0342458	311.125	311.123	311.139	360.542	358.922	361.418	4	2	2	http://metlin.scripps.edu/metabo_list.php?mass_min=309.97&mass_max=310.27	1.13621e+07	1.11819e+07	4.33324e+06	3.39062e+06
487	M610T799	3.19164	-5.30874	0.0342689	610.42	610.412	610.423	799.391	798.507	799.848	4	2	2	http://metlin.scripps.edu/metabo_list.php?mass_min=609.27&mass_max=609.57	6.47232e+06	7.83802e+06	2.86658e+06	1.61711e+06
488	M330T222	2.22782	5.68622	0.0344322	330.152	330.146	330.163	221.994	221.753	222.403	4	2	2	http://metlin.scripps.edu/metabo_list.php?mass_min=329&mass_max=329.3	1.57386e+07	2.22682e+07	4.48218e+07	3.98504e+07
489	M895T848	3.31138	-5.32735	0.0344983	894.636	894.636	894.636	847.685	847.579	847.807	4	2	2	http://metlin.scripps.edu/metabo_list.php?mass_min=893.49&mass_max=893.79	3.56874e+07	4.24856e+07	1.56343e+07	7.9731e+06
490	M501T834	2.84567	-5.23565	0.0346155	501.364	501.363	501.364	833.565	833.504	833.67	4	2	2	http://metlin.scripps.edu/metabo_list.php?mass_min=500.21&mass_max=500.51	4.76362e+07	5.67055e+07	2.29384e+07	1.37284e+07
491	M747T371	3.52493	-16.3501	0.0347832	747.247	747.242	747.255	370.901	370.676	371.64	4	2	2	http://metlin.scripps.edu/metabo_list.php?mass_min=746.1&mass_max=746.4	1.08989e+07	1.18866e+07	3.30454e+06	3.15955e+06
492	M385T332	2.13181	-5.85975	0.0348417	385.192	385.189	385.195	332.325	332.083	332.391	4	2	2	http://metlin.scripps.edu/metabo_list.php?mass_min=384.04&mass_max=384.34	4.18224e+07	4.84705e+07	2.35613e+07	1.87937e+07
493	M254T282	3.07606	10.3559	0.0348494	254.035	254.033	254.038	282.212	281.345	283.217	4	2	2	http://metlin.scripps.edu/metabo_list.php?mass_min=252.88&mass_max=253.18	887671	1.02144e+06	3.11556e+06	2.75698e+06
494	M346T319	7.11575	7.68013	0.0348937	346.259	346.109	346.259	319.2	317.515	319.467	4	2	2	http://metlin.scripps.edu/metabo_list.php?mass_min=345.11&mass_max=345.41	3.13425e+06	1.82582e+07	8.00312e+07	7.21918e+07
495	M927T503	4.50562	-8.85846	0.0349001	927.389	927.388	927.389	502.573	502.253	502.74	4	2	2	http://metlin.scripps.edu/metabo_list.php?mass_min=926.24&mass_max=926.54	3.9911e+07	3.39813e+07	9.51917e+06	6.88085e+06
496	M841T391	2.18206	-5.27544	0.0349096	840.515	840.515	840.515	391.028	390.776	391.133	4	2	2	http://metlin.scripps.edu/metabo_list.php?mass_min=839.36&mass_max=839.66	5.52709e+06	6.34241e+06	3.17279e+06	2.2668e+06
497	M351T488	2.13653	-5.25127	0.0349207	351.19	351.19	351.19	487.577	487.25	487.904	2	2	0	http://metlin.scripps.edu/metabo_list.php?mass_min=350.04&mass_max=350.34	6.82002e+07	5.87334e+07	3.40564e+07	2.53548e+07
498	M583T616	3.12401	-5.38088	0.0349219	583.189	583.182	583.195	615.883	615.394	616.371	2	2	0	http://metlin.scripps.edu/metabo_list.php?mass_min=582.04&mass_max=582.34	1.3571e+06	1.1528e+06	522993	280431
499	M637T488	2.53611	-5.29623	0.0350052	636.749	636.749	636.75	488.489	488.318	488.838	4	2	2	http://metlin.scripps.edu/metabo_list.php?mass_min=635.6&mass_max=635.9	2.46569e+07	2.07597e+07	1.06708e+07	7.2372e+06
500	M836T469	1.8545	-5.22433	0.0350068	836.431	836.421	836.432	469.366	468.567	470.355	4	2	2	http://metlin.scripps.edu/metabo_list.php?mass_min=835.28&mass_max=835.58	1.03439e+07	9.16447e+06	5.88612e+06	4.6334e+06
501	M500T834	2.83121	-5.20456	0.0350291	500.361	500.361	500.361	833.565	833.504	833.67	4	2	2	http://metlin.scripps.edu/metabo_list.php?mass_min=499.21&mass_max=499.51	2.71373e+08	3.23011e+08	1.3138e+08	7.85605e+07
502	M505T829	3.24962	-5.41441	0.0350619	505.324	505.324	505.325	828.809	828.784	828.961	3	2	1	http://metlin.scripps.edu/metabo_list.php?mass_min=504.17&mass_max=504.47	7.89509e+06	9.29306e+06	3.49247e+06	1.79681e+06
503	M342T154	2.22143	-10.5255	0.0350717	342.145	342.145	342.145	154.333	153.598	154.759	4	2	2	http://metlin.scripps.edu/metabo_list.php?mass_min=340.99&mass_max=341.29	1.09761e+07	1.21095e+07	4.99014e+06	5.4021e+06
504	M395T489	2.29678	-5.67744	0.0352075	395.178	395.178	395.178	489.033	488.794	489.15	4	2	2	http://metlin.scripps.edu/metabo_list.php?mass_min=394.03&mass_max=394.33	3.73619e+09	3.18481e+09	1.71265e+09	1.3007e+09
505	M309T129	3.08229	-6.05632	0.0352509	309.167	309.167	309.167	128.696	127.818	130.194	4	2	2	http://metlin.scripps.edu/metabo_list.php?mass_min=308.02&mass_max=308.32	3.34594e+07	2.78021e+07	1.18542e+07	8.02111e+06
506	M708T318	2.23331	-6.19183	0.0352541	708.326	708.321	708.329	318.305	315.312	320.438	4	2	2	http://metlin.scripps.edu/metabo_list.php?mass_min=707.18&mass_max=707.48	1.0573e+07	1.22753e+07	5.67541e+06	4.55532e+06
507	M214T682	1.68301	-5.34808	0.0352987	214.072	214.072	214.072	682.284	682.284	682.284	1	1	0	http://metlin.scripps.edu/metabo_list.php?mass_min=212.92&mass_max=213.22	5.39246e+06	6.05672e+06	3.68138e+06	3.12141e+06
508	M524T404	2.58422	-14.8028	0.0355584	524.065	524.065	524.066	403.971	403.875	404.067	2	2	0	http://metlin.scripps.edu/metabo_list.php?mass_min=522.92&mass_max=523.22	625067	576238	237196	227666
509	M317T86	1.29603	12.4939	0.0356412	316.912	316.884	316.955	86.3585	84.1217	88.3088	4	2	2	http://metlin.scripps.edu/metabo_list.php?mass_min=315.76&mass_max=316.06	746584	756170	990949	956658
510	M881T370	2.86717	-10.3541	0.0356768	881.354	881.353	881.354	370.06	370.017	370.532	4	2	2	http://metlin.scripps.edu/metabo_list.php?mass_min=880.2&mass_max=880.5	8.00124e+08	9.00618e+08	3.14914e+08	2.78264e+08
511	M241T316	2.04137	6.18386	0.0357924	241.097	241.096	241.098	315.598	315.536	315.661	2	0	2	http://metlin.scripps.edu/metabo_list.php?mass_min=239.95&mass_max=240.25	863802	718373	1.72653e+06	1.50328e+06
512	M544T820	3.17649	-5.98881	0.035794	544.387	544.387	544.387	819.917	819.878	819.929	4	2	2	http://metlin.scripps.edu/metabo_list.php?mass_min=543.24&mass_max=543.54	8.21065e+07	9.92696e+07	3.43818e+07	2.27177e+07
513	M302T363	4.89445	-10.5035	0.035975	302.067	302.066	302.067	363.1	362.083	363.9	4	2	2	http://metlin.scripps.edu/metabo_list.php?mass_min=300.92&mass_max=301.22	2.55841e+07	2.21748e+07	5.48432e+06	4.27343e+06
514	M256T567	1.51848	-5.88092	0.0360838	256.152	256.137	256.162	567.178	564.629	568.425	4	2	2	http://metlin.scripps.edu/metabo_list.php?mass_min=255&mass_max=255.3	5.51419e+06	5.01176e+06	3.63992e+06	3.292e+06
515	M371T713	1.78441	-5.12242	0.0361094	371.166	371.161	371.169	712.74	712.637	713.302	4	2	2	http://metlin.scripps.edu/metabo_list.php?mass_min=370.02&mass_max=370.32	1.24379e+07	1.40663e+07	8.22057e+06	6.6326e+06
516	M383T139	38.7205	16.6579	0.0363332	383.037	383.036	383.037	138.553	138.399	138.708	2	0	2	http://metlin.scripps.edu/metabo_list.php?mass_min=381.89&mass_max=382.19	28191	18064.8	843398	947650
517	M476T683	2.25311	-5.20774	0.036342	476.217	476.217	476.217	683.322	683.222	683.421	2	2	0	http://metlin.scripps.edu/metabo_list.php?mass_min=475.07&mass_max=475.37	6.24806e+06	7.34241e+06	3.49264e+06	2.53923e+06
518	M450T409	2.7473	-15.9049	0.0365003	450.166	450.165	450.169	409.026	408.634	409.413	4	2	2	http://metlin.scripps.edu/metabo_list.php?mass_min=449.02&mass_max=449.32	1.13678e+08	1.12484e+08	4.56429e+07	3.66783e+07
519	M500T195	48.7507	16.9205	0.0365513	500.228	500.228	500.228	194.934	194.728	195.139	2	0	2	http://metlin.scripps.edu/metabo_list.php?mass_min=499.08&mass_max=499.38	200202	132263	8.57183e+06	7.63606e+06
520	M447T610	10.6971	13.069	0.0365816	447.157	447.157	447.157	610.45	610.309	610.59	2	0	2	http://metlin.scripps.edu/metabo_list.php?mass_min=446.01&mass_max=446.31	715607	1.0252e+06	9.93782e+06	8.6838e+06
521	M824T362	3.40187	-7.0571	0.0366025	824.366	824.366	824.366	362.046	361.613	362.48	2	2	0	http://metlin.scripps.edu/metabo_list.php?mass_min=823.22&mass_max=823.52	4.70342e+06	4.2714e+06	1.71267e+06	925526
522	M682T801	3.67838	-5.56271	0.0366263	682.42	682.419	682.42	801.3	801.117	801.418	3	2	1	http://metlin.scripps.edu/metabo_list.php?mass_min=681.27&mass_max=681.57	1.72779e+06	2.02088e+06	706323	312786
523	M480T726	4.83561	-14.8633	0.0367619	480.295	480.295	480.295	725.509	725.317	725.7	2	2	0	http://metlin.scripps.edu/metabo_list.php?mass_min=479.15&mass_max=479.45	5.09377e+06	5.65907e+06	1.16114e+06	1.06254e+06
524	M896T848	3.31587	-5.06884	0.0367947	895.639	895.639	895.64	847.598	847.479	847.753	4	2	2	http://metlin.scripps.edu/metabo_list.php?mass_min=894.49&mass_max=894.79	1.68623e+07	2.0482e+07	7.45975e+06	3.80257e+06
525	M504T834	3.09698	-5.70231	0.036828	503.842	503.842	503.842	833.562	833.504	833.568	3	2	1	http://metlin.scripps.edu/metabo_list.php?mass_min=502.69&mass_max=502.99	1.3636e+06	1.56535e+06	614519	331223
526	M239T89	1.77414	-7.35646	0.0368479	238.922	238.921	238.923	88.7558	88.1939	89.3177	2	2	0	http://metlin.scripps.edu/metabo_list.php?mass_min=237.77&mass_max=238.07	632378	702578	357912	394542
527	M266T556	4.73204	-10.1518	0.0368674	266.176	266.175	266.176	556.447	556.422	556.471	2	2	0	http://metlin.scripps.edu/metabo_list.php?mass_min=265.03&mass_max=265.33	6.38113e+06	7.38697e+06	1.63668e+06	1.27286e+06
528	M784T758	5.29011	-8.03362	0.036879	784.49	784.49	784.49	758.334	758.334	758.334	1	1	0	http://metlin.scripps.edu/metabo_list.php?mass_min=783.34&mass_max=783.64	1.44109e+06	1.32167e+06	387141	135110
529	M361T524	5.42662	-6.29809	0.0368903	361.257	361.257	361.257	524.028	524.013	524.042	2	2	0	http://metlin.scripps.edu/metabo_list.php?mass_min=360.11&mass_max=360.41	2.30246e+06	2.87142e+06	653731	299695
530	M362T768	2.77372	-5.3131	0.0369566	362.222	362.219	362.222	767.892	767.696	768.127	3	2	1	http://metlin.scripps.edu/metabo_list.php?mass_min=361.07&mass_max=361.37	4.56419e+06	5.30986e+06	2.24261e+06	1.31724e+06
531	M730T910	1.02351	-5.15665	0.0370143	730.495	730.495	730.495	909.606	909.403	909.856	4	2	2	http://metlin.scripps.edu/metabo_list.php?mass_min=729.34&mass_max=729.64	1.06457e+07	1.07174e+07	1.0405e+07	1.04675e+07
532	M866T323	6.66981	-10.6881	0.0370565	866.33	866.33	866.331	322.806	321.392	324.22	2	2	0	http://metlin.scripps.edu/metabo_list.php?mass_min=865.18&mass_max=865.48	3.11549e+07	2.67869e+07	5.07795e+06	3.60922e+06
533	M500T383	3.74623	10.7751	0.037164	500.133	500.132	500.133	383.248	383.182	383.314	2	0	2	http://metlin.scripps.edu/metabo_list.php?mass_min=498.98&mass_max=499.28	463384	394591	1.5033e+06	1.71087e+06
534	M539T458	8.21167	7.89162	0.0373703	539.298	539.298	539.298	457.516	457.516	457.516	1	0	1	http://metlin.scripps.edu/metabo_list.php?mass_min=538.15&mass_max=538.45	262231	603577	3.19797e+06	3.91176e+06
535	M230T787	1.68928	-5.07607	0.0373886	230.287	230.283	230.291	787.417	787.167	787.666	2	2	0	http://metlin.scripps.edu/metabo_list.php?mass_min=229.14&mass_max=229.44	959525	1.08095e+06	659081	548816
536	M865T323	7.29393	-12.2316	0.0375025	865.327	865.327	865.327	323.437	322.654	324.22	2	2	0	http://metlin.scripps.edu/metabo_list.php?mass_min=864.18&mass_max=864.48	5.12958e+07	4.47517e+07	7.46254e+06	5.7056e+06
537	M770T264	26.3229	-13.46	0.0375791	770.336	770.336	770.336	264.391	264.374	264.407	2	2	0	http://metlin.scripps.edu/metabo_list.php?mass_min=769.19&mass_max=769.49	3.53063e+06	4.06061e+06	202286	86103.6
538	M1338T371	4.50858	-13.8276	0.0375979	1338.39	1338.39	1338.39	370.988	370.988	370.988	1	1	0	http://metlin.scripps.edu/metabo_list.php?mass_min=1337.24&mass_max=1337.54	8.96882e+06	1.00156e+07	2.2123e+06	1.99844e+06
539	M239T350	4.24061	-11.9632	0.0376581	239.112	239.112	239.112	349.758	349.621	349.896	2	2	0	http://metlin.scripps.edu/metabo_list.php?mass_min=237.96&mass_max=238.26	1.19679e+07	1.35379e+07	3.22509e+06	2.78957e+06
540	M581T223	2.78459	-5.04295	0.0377189	581.257	581.257	581.257	222.812	222.812	222.812	1	1	0	http://metlin.scripps.edu/metabo_list.php?mass_min=580.11&mass_max=580.41	3.13263e+06	3.78021e+06	1.53809e+06	944441
541	M470T841	2.91606	-5.20668	0.0378012	469.835	469.835	469.835	840.593	840.57	840.875	4	2	2	http://metlin.scripps.edu/metabo_list.php?mass_min=468.68&mass_max=468.98	6.18303e+07	7.25923e+07	2.96051e+07	1.64922e+07
542	M636T777	2.33975	-6.04419	0.0378304	636.37	636.368	636.373	776.558	776.473	776.565	3	2	1	http://metlin.scripps.edu/metabo_list.php?mass_min=635.22&mass_max=635.52	4.70837e+06	5.21671e+06	2.51647e+06	1.72547e+06
543	M361T349	4.83973	-14.4112	0.0378405	361.115	361.115	361.115	348.913	348.884	348.942	2	2	0	http://metlin.scripps.edu/metabo_list.php?mass_min=359.97&mass_max=360.27	2.31761e+07	2.58331e+07	4.82857e+06	5.29785e+06
544	M665T372	4.53762	-13.3689	0.0378475	665.201	665.199	665.204	371.853	371.781	371.924	2	2	0	http://metlin.scripps.edu/metabo_list.php?mass_min=664.05&mass_max=664.35	3.82139e+06	3.9181e+06	1.07324e+06	632387
545	M250T409	6.59454	-10.852	0.0378576	250.152	250.152	250.152	409.221	408.496	409.741	3	2	1	http://metlin.scripps.edu/metabo_list.php?mass_min=249&mass_max=249.3	2.40159e+07	2.78786e+07	4.55472e+06	3.31459e+06
546	M323T89	2.39961	16.7457	0.0379607	322.998	322.994	323.003	89.08	88.8175	89.3425	2	0	2	http://metlin.scripps.edu/metabo_list.php?mass_min=321.85&mass_max=322.15	907677	767656	2.01059e+06	2.00955e+06
1867	M1002T375	Inf	5.8436	0.107898	1002.32	1002.32	1002.32	374.741	374.741	374.741	1	0	1	http://metlin.scripps.edu/metabo_list.php?mass_min=1001.17&mass_max=1001.47	0	0	9.13011e+06	6.46189e+06
548	M800T497	8.71123	9.16934	0.0380145	799.542	799.542	799.542	496.692	496.692	496.692	1	0	1	http://metlin.scripps.edu/metabo_list.php?mass_min=798.39&mass_max=798.69	136890	260390	1.88562e+06	1.57518e+06
549	M739T710_2	2.83707	-5.39345	0.0380231	739.48	739.48	739.48	710.331	710.124	710.516	4	2	2	http://metlin.scripps.edu/metabo_list.php?mass_min=738.33&mass_max=738.63	2.20858e+07	2.55389e+07	1.06719e+07	6.11469e+06
550	M315T86	1.83309	-6.09373	0.038071	315.084	315.084	315.084	85.9222	85.7847	86.1566	4	2	2	http://metlin.scripps.edu/metabo_list.php?mass_min=313.93&mass_max=314.23	5.81246e+07	6.59432e+07	3.1367e+07	3.63154e+07
551	M704T363	4.43307	-10.744	0.0381571	704.321	704.301	704.342	363.483	360.967	366.513	4	2	2	http://metlin.scripps.edu/metabo_list.php?mass_min=703.17&mass_max=703.47	4.943e+06	5.67111e+06	1.31461e+06	1.07969e+06
552	M842T774	3.20572	-5.05966	0.0381969	841.549	841.549	841.549	774.231	774.231	774.231	1	1	0	http://metlin.scripps.edu/metabo_list.php?mass_min=840.4&mass_max=840.7	3.6651e+06	4.49958e+06	1.63966e+06	907251
553	M481T615	3.27715	-6.47779	0.0382342	481.253	481.253	481.253	615.038	615.005	615.058	4	2	2	http://metlin.scripps.edu/metabo_list.php?mass_min=480.1&mass_max=480.4	3.89271e+07	4.68678e+07	1.54158e+07	1.07639e+07
554	M778T549	6.41692	5.22391	0.038332	778.4	778.4	778.4	549.302	548.743	549.862	2	0	2	http://metlin.scripps.edu/metabo_list.php?mass_min=777.25&mass_max=777.55	390477	1.82724e+06	8.01326e+06	6.21767e+06
555	M250T673	3.36304	-15.9752	0.038347	250.144	250.144	250.144	672.501	672.501	672.501	1	1	0	http://metlin.scripps.edu/metabo_list.php?mass_min=248.99&mass_max=249.29	1.77107e+06	1.78431e+06	606505	450687
556	M391T413	7.95783	-5.3633	0.0383972	391.287	391.167	391.287	413.476	413.325	429.863	3	2	1	http://metlin.scripps.edu/metabo_list.php?mass_min=390.14&mass_max=390.44	1.69249e+08	1.30326e+08	4.07372e+06	3.35715e+07
557	M984T834	4.18071	-5.66095	0.038511	983.692	983.692	983.693	833.775	833.504	833.885	4	2	2	http://metlin.scripps.edu/metabo_list.php?mass_min=982.54&mass_max=982.84	3.05024e+06	3.80796e+06	1.08262e+06	557817
558	M316T524	3.73486	-6.66602	0.0385175	316.264	316.264	316.264	523.704	523.688	523.72	2	2	0	http://metlin.scripps.edu/metabo_list.php?mass_min=315.11&mass_max=315.41	2.13562e+06	2.58761e+06	759692	504938
559	M338T262	2.42974	6.75117	0.0387506	338.147	338.147	338.147	261.952	261.87	262.033	2	0	2	http://metlin.scripps.edu/metabo_list.php?mass_min=337&mass_max=337.3	4.03113e+06	5.86515e+06	1.25298e+07	1.15156e+07
560	M502T488	1.75474	-7.62418	0.038759	502.109	502.108	502.111	488.408	487.539	489.773	4	2	2	http://metlin.scripps.edu/metabo_list.php?mass_min=500.96&mass_max=501.26	4.08661e+06	3.89094e+06	2.0705e+06	2.47579e+06
561	M320T317	4.25227	-10.7712	0.038906	320.136	320.128	320.149	317.42	317.187	317.832	4	2	2	http://metlin.scripps.edu/metabo_list.php?mass_min=318.99&mass_max=319.29	1.19721e+07	1.37122e+07	3.29313e+06	2.74703e+06
562	M525T386	4.28106	-15.8357	0.0389581	525.271	525.271	525.271	386.447	386.355	386.54	2	2	0	http://metlin.scripps.edu/metabo_list.php?mass_min=524.12&mass_max=524.42	7.60278e+06	7.65916e+06	2.15074e+06	1.41425e+06
563	M709T536	150.566	16.3107	0.038981	709.227	709.227	709.228	536.048	535.964	536.131	2	0	2	http://metlin.scripps.edu/metabo_list.php?mass_min=708.08&mass_max=708.38	13692.5	14263	2.23275e+06	1.9764e+06
564	M527T561	2.26489	-6.00858	0.0390419	527.226	527.226	527.226	560.514	559.507	561.238	4	2	2	http://metlin.scripps.edu/metabo_list.php?mass_min=526.08&mass_max=526.38	7.23877e+07	6.18405e+07	3.29644e+07	2.63004e+07
565	M254T488	2.55081	-15.8659	0.0391047	254.135	254.13	254.14	488.044	487.874	488.215	2	2	0	http://metlin.scripps.edu/metabo_list.php?mass_min=252.98&mass_max=253.28	5.66222e+06	5.69215e+06	2.44267e+06	2.00861e+06
566	M872T694	2.76978	-4.92626	0.0391304	871.56	871.56	871.56	694.112	693.884	694.34	2	1	1	http://metlin.scripps.edu/metabo_list.php?mass_min=870.41&mass_max=870.71	1.24592e+06	1.50612e+06	618973	374620
567	M471T841	2.85616	-4.95411	0.0391916	470.838	470.837	470.838	840.894	840.875	840.938	4	2	2	http://metlin.scripps.edu/metabo_list.php?mass_min=469.69&mass_max=469.99	9.01425e+06	1.07537e+07	4.42219e+06	2.49896e+06
568	M478T841	2.87001	-4.92579	0.0391934	478.348	478.348	478.349	840.745	840.57	840.891	4	2	2	http://metlin.scripps.edu/metabo_list.php?mass_min=477.2&mass_max=477.5	4.22948e+08	5.069e+08	2.06939e+08	1.17049e+08
569	M406T287	1.97736	-10.3027	0.0392432	406.173	406.173	406.182	286.773	286.281	287.094	4	2	2	http://metlin.scripps.edu/metabo_list.php?mass_min=405.02&mass_max=405.32	2.09483e+07	2.03255e+07	1.13764e+07	9.49678e+06
570	M237T581	3.65253	6.407	0.0392747	237.184	237.184	237.184	580.739	580.68	580.799	2	0	2	http://metlin.scripps.edu/metabo_list.php?mass_min=236.03&mass_max=236.33	7.50201e+06	1.1446e+07	3.79946e+07	3.12136e+07
571	M258T371	2.63723	-10.2072	0.0393163	258.076	258.076	258.077	371.313	371.27	371.469	4	2	2	http://metlin.scripps.edu/metabo_list.php?mass_min=256.93&mass_max=257.23	2.53362e+07	2.84374e+07	1.07145e+07	9.67569e+06
572	M720T377	2.68612	-12.8108	0.0394032	720.3	720.299	720.303	376.748	376.451	404.067	4	2	2	http://metlin.scripps.edu/metabo_list.php?mass_min=719.15&mass_max=719.45	1.25291e+07	1.27986e+07	5.32028e+06	4.10887e+06
573	M331T222	1.91791	5.29442	0.0395111	331.154	331.149	331.163	221.739	221.452	221.856	4	2	2	http://metlin.scripps.edu/metabo_list.php?mass_min=330&mass_max=330.3	3.55538e+06	4.69822e+06	8.34539e+06	7.48426e+06
574	M468T333	1.574	-5.52663	0.0395367	468.143	468.142	468.144	332.656	332.655	332.657	2	2	0	http://metlin.scripps.edu/metabo_list.php?mass_min=466.99&mass_max=467.29	1.25933e+06	1.40314e+06	896220	795315
575	M426T467	21.0287	15.8297	0.0396769	426.156	426.142	426.158	467.383	466.984	493.669	6	2	2	http://metlin.scripps.edu/metabo_list.php?mass_min=425.01&mass_max=425.31	1.2546e+07	1.41916e+07	2.98023e+08	2.64233e+08
576	M340T855	2.33465	-4.93944	0.039732	340.21	340.21	340.21	854.58	854.453	854.706	2	2	0	http://metlin.scripps.edu/metabo_list.php?mass_min=339.06&mass_max=339.36	3.90611e+06	4.55616e+06	2.1786e+06	1.44605e+06
577	M362T348	6.01426	-14.8237	0.0400867	362.12	362.12	362.12	348.239	348.212	348.267	2	2	0	http://metlin.scripps.edu/metabo_list.php?mass_min=360.97&mass_max=361.27	5.26463e+06	5.88768e+06	963343	890968
578	M366T489	2.10093	-5.02126	0.0401038	366.181	366.181	366.181	489.203	489.121	489.422	4	2	2	http://metlin.scripps.edu/metabo_list.php?mass_min=365.03&mass_max=365.33	1.69635e+08	1.44404e+08	8.51962e+07	6.42799e+07
579	M614T786	5.54345	-11.7738	0.0401441	614.343	614.343	614.343	786.075	786.075	786.075	1	1	0	http://metlin.scripps.edu/metabo_list.php?mass_min=613.19&mass_max=613.49	637288	659815	160714	73274.2
580	M481T840	2.90529	-5.47391	0.0404701	480.825	480.825	480.825	840.425	840.242	840.571	4	2	2	http://metlin.scripps.edu/metabo_list.php?mass_min=479.68&mass_max=479.98	1.30141e+07	1.4929e+07	6.18199e+06	3.43605e+06
581	M337T415	3.30597	-7.68016	0.0405467	337.256	337.256	337.256	415.109	415.109	415.109	1	1	0	http://metlin.scripps.edu/metabo_list.php?mass_min=336.11&mass_max=336.41	2.9413e+06	2.49322e+06	925401	718447
582	M480T615	3.07239	-6.23561	0.0405662	480.249	480.249	480.25	615.203	615.021	615.399	4	2	2	http://metlin.scripps.edu/metabo_list.php?mass_min=479.1&mass_max=479.4	1.29489e+08	1.56146e+08	5.42957e+07	3.86725e+07
583	M459T848	2.93731	-4.86586	0.0406687	458.812	458.812	458.812	847.618	847.479	847.753	3	1	2	http://metlin.scripps.edu/metabo_list.php?mass_min=457.66&mass_max=457.96	1.70511e+07	2.04442e+07	8.27447e+06	4.49069e+06
584	M338T488	2.03921	-6.50934	0.0407306	338.114	338.113	338.115	488.407	487.853	489.15	4	2	2	http://metlin.scripps.edu/metabo_list.php?mass_min=336.96&mass_max=337.26	4.97501e+07	4.61062e+07	2.67836e+07	2.02231e+07
585	M447T85	1.63946	-9.00847	0.0407975	446.887	446.887	446.888	85.1787	85.0962	85.248	4	2	2	http://metlin.scripps.edu/metabo_list.php?mass_min=445.74&mass_max=446.04	4.46347e+06	4.32826e+06	2.8592e+06	2.50336e+06
586	M780T371	2.59575	-7.41091	0.0408468	780.288	780.27	780.309	371.086	370.676	372.211	4	2	2	http://metlin.scripps.edu/metabo_list.php?mass_min=779.14&mass_max=779.44	8.57501e+06	9.96234e+06	3.90235e+06	3.23908e+06
587	M711T715	3.41564	-5.67626	0.0408681	711.428	711.428	711.428	715.225	715.147	715.283	3	2	1	http://metlin.scripps.edu/metabo_list.php?mass_min=710.28&mass_max=710.58	4.73982e+06	5.43563e+06	2.01943e+06	959638
588	M542T556	10.3372	6.50022	0.0409303	541.761	541.76	541.761	556.014	555.991	556.037	2	0	2	http://metlin.scripps.edu/metabo_list.php?mass_min=540.61&mass_max=540.91	97091	542408	3.70702e+06	2.90358e+06
589	M881T768	2.88775	-6.3299	0.0409631	880.62	880.62	880.62	767.766	767.696	767.892	4	2	2	http://metlin.scripps.edu/metabo_list.php?mass_min=879.47&mass_max=879.77	1.04469e+08	1.15752e+08	4.80033e+07	2.8257e+07
590	M815T320	2.92667	-5.15795	0.0411268	815.344	815.344	815.344	320.438	320.438	320.438	1	1	0	http://metlin.scripps.edu/metabo_list.php?mass_min=814.19&mass_max=814.49	2.01895e+06	2.47607e+06	941278	594606
591	M282T87	1.70305	13.1596	0.0411296	281.957	281.941	281.972	87.4871	85.9158	89.3425	4	2	2	http://metlin.scripps.edu/metabo_list.php?mass_min=280.81&mass_max=281.11	620685	558718	998584	1.01e+06
592	M646T590	2.80105	-6.27159	0.0411617	646.435	646.433	646.436	590.306	590.244	590.368	2	2	0	http://metlin.scripps.edu/metabo_list.php?mass_min=645.28&mass_max=645.58	2.2562e+06	2.49944e+06	1.06019e+06	637620
593	M566T813	3.42236	-6.18724	0.0411629	566.401	566.401	566.401	813.211	813.129	813.308	4	2	2	http://metlin.scripps.edu/metabo_list.php?mass_min=565.25&mass_max=565.55	3.62506e+07	4.41938e+07	1.40762e+07	9.42935e+06
594	M297T286	2.24461	-5.05595	0.041214	297.124	297.123	297.124	285.514	285.425	285.604	2	2	0	http://metlin.scripps.edu/metabo_list.php?mass_min=295.97&mass_max=296.27	7.28757e+06	8.66189e+06	4.09387e+06	3.01179e+06
595	M497T682	2.54994	-4.94825	0.0413507	497.234	497.234	497.235	681.869	681.448	682.284	4	2	2	http://metlin.scripps.edu/metabo_list.php?mass_min=496.08&mass_max=496.38	6.66601e+07	8.06192e+07	3.46333e+07	2.31247e+07
596	M329T715	1.66162	-4.86019	0.0413962	329.133	329.123	329.141	714.558	714.249	714.651	4	2	2	http://metlin.scripps.edu/metabo_list.php?mass_min=327.98&mass_max=328.28	9.10877e+06	1.03102e+07	6.36482e+06	5.32201e+06
597	M323T635	4.73769	5.94585	0.0414091	323.128	323.128	323.128	634.769	634.76	634.779	2	0	2	http://metlin.scripps.edu/metabo_list.php?mass_min=321.98&mass_max=322.28	1.63234e+06	3.2254e+06	1.28098e+07	1.02046e+07
598	M225T371	2.40735	-12.717	0.0414512	225.064	225.059	225.07	371.155	370.957	371.469	4	2	2	http://metlin.scripps.edu/metabo_list.php?mass_min=223.91&mass_max=224.21	9.75805e+06	1.06792e+07	4.33707e+06	4.15248e+06
599	M804T829	1.44194	13.2044	0.0414641	804.488	804.488	804.488	828.738	828.738	828.738	1	0	1	http://metlin.scripps.edu/metabo_list.php?mass_min=803.34&mass_max=803.64	898460	841131	1.24911e+06	1.25928e+06
600	M724T311	1.73396	-4.928	0.0415189	724.302	724.302	724.31	310.734	310.588	312.372	3	1	2	http://metlin.scripps.edu/metabo_list.php?mass_min=723.15&mass_max=723.45	5.06293e+06	4.53687e+06	3.08564e+06	2.45069e+06
601	M318T524	3.98388	-6.24286	0.0415348	318.242	318.242	318.242	523.688	523.688	523.688	1	1	0	http://metlin.scripps.edu/metabo_list.php?mass_min=317.09&mass_max=317.39	3.95373e+06	4.87173e+06	1.37147e+06	843826
602	M310T489	2.5705	-5.67934	0.0416194	310.12	310.118	310.126	488.579	488.481	488.809	4	2	2	http://metlin.scripps.edu/metabo_list.php?mass_min=308.97&mass_max=309.27	3.4055e+07	2.84113e+07	1.39746e+07	1.03267e+07
603	M328T222	2.53318	-4.75009	0.0417286	328.193	328.173	328.212	221.894	220.446	223.153	4	2	2	http://metlin.scripps.edu/metabo_list.php?mass_min=327.04&mass_max=327.34	2.72127e+07	3.24717e+07	1.45271e+07	9.03393e+06
604	M878T408	10.9728	-11.6183	0.0417794	878.341	878.341	878.342	408.496	408.432	408.569	3	2	1	http://metlin.scripps.edu/metabo_list.php?mass_min=877.19&mass_max=877.49	1.88496e+07	1.61881e+07	1.92411e+06	1.26902e+06
605	M882T768	2.87011	-6.092	0.0417975	881.623	881.623	881.624	767.766	767.696	767.892	4	2	2	http://metlin.scripps.edu/metabo_list.php?mass_min=880.47&mass_max=880.77	4.88011e+07	5.4404e+07	2.27347e+07	1.32239e+07
606	M840T774	2.87866	-5.60106	0.0419093	839.603	839.603	839.603	774.243	774.231	774.314	3	2	1	http://metlin.scripps.edu/metabo_list.php?mass_min=838.45&mass_max=838.75	6.55031e+06	7.44364e+06	3.11265e+06	1.74862e+06
607	M689T358	3.85409	-8.64739	0.0419248	689.283	689.278	689.288	358.325	358.269	358.381	2	2	0	http://metlin.scripps.edu/metabo_list.php?mass_min=688.13&mass_max=688.43	2.69578e+06	3.16333e+06	851157	669072
608	M479T841	2.86683	-4.77929	0.0419766	479.351	479.35	479.351	840.745	840.57	840.891	4	2	2	http://metlin.scripps.edu/metabo_list.php?mass_min=478.2&mass_max=478.5	6.86985e+07	8.24835e+07	3.40206e+07	1.87144e+07
609	M798T532	4.55512	4.82293	0.0420338	798.366	798.366	798.366	531.509	531.439	531.579	2	0	2	http://metlin.scripps.edu/metabo_list.php?mass_min=797.22&mass_max=797.52	685845	1.9654e+06	6.77696e+06	5.29977e+06
610	M435T332	2.27238	-6.78593	0.0420651	435.172	435.172	435.173	331.841	330.711	332.988	4	2	2	http://metlin.scripps.edu/metabo_list.php?mass_min=434.02&mass_max=434.32	1.70688e+07	1.47369e+07	7.60041e+06	6.39626e+06
611	M550T556	3.49892	-10.7333	0.0420808	550.216	550.216	550.216	555.724	555.647	555.81	4	2	2	http://metlin.scripps.edu/metabo_list.php?mass_min=549.07&mass_max=549.37	8.04405e+07	7.75757e+07	2.76391e+07	1.75224e+07
612	M799T781	3.1595	-4.78793	0.0420984	798.526	798.526	798.527	780.842	780.738	780.946	2	2	0	http://metlin.scripps.edu/metabo_list.php?mass_min=797.38&mass_max=797.68	3.62406e+06	4.38273e+06	1.69455e+06	839644
613	M634T496	14.2999	6.79707	0.0422544	634.384	634.38	634.384	496.377	496.07	496.503	3	1	2	http://metlin.scripps.edu/metabo_list.php?mass_min=633.23&mass_max=633.53	72669.5	1.29792e+06	1.09925e+07	8.60689e+06
614	M212T682	2.41945	-4.74881	0.0422712	212.06	212.06	212.06	682.384	682.284	682.484	2	2	0	http://metlin.scripps.edu/metabo_list.php?mass_min=210.91&mass_max=211.21	3.84358e+06	4.61552e+06	2.10038e+06	1.39592e+06
615	M513T766	2.33091	-4.71618	0.0423076	513.304	513.3	513.31	766.192	765.905	766.41	4	2	2	http://metlin.scripps.edu/metabo_list.php?mass_min=512.15&mass_max=512.45	2.48483e+07	2.96161e+07	1.39605e+07	9.40556e+06
616	M236T488	2.47573	-9.23601	0.0423456	236.094	236.094	236.094	488.481	488.481	488.481	1	0	1	http://metlin.scripps.edu/metabo_list.php?mass_min=234.94&mass_max=235.24	7.23461e+06	6.40472e+06	2.90136e+06	2.60787e+06
617	M306T683	2.26282	-4.80988	0.0423685	306.123	306.123	306.123	682.696	682.596	682.796	2	2	0	http://metlin.scripps.edu/metabo_list.php?mass_min=304.97&mass_max=305.27	7.30582e+06	8.714e+06	4.1464e+06	2.93318e+06
618	M468T282	2.77189	-14.8295	0.0424753	468.135	468.135	468.135	282.373	282.373	282.373	1	1	0	http://metlin.scripps.edu/metabo_list.php?mass_min=466.98&mass_max=467.28	1.60135e+06	1.46911e+06	556677	551036
619	M297T391	2.27355	-4.69417	0.0425383	297.123	297.123	297.123	390.598	390.505	390.69	2	2	0	http://metlin.scripps.edu/metabo_list.php?mass_min=295.97&mass_max=296.27	7.01926e+06	8.32628e+06	4.01608e+06	2.7335e+06
620	M909T467	41.4989	13.6795	0.0426006	909.307	909.307	909.308	466.632	466.631	466.634	2	0	2	http://metlin.scripps.edu/metabo_list.php?mass_min=908.16&mass_max=908.46	101218	232316	7.40998e+06	6.43128e+06
621	M939T715	2.60427	-5.31335	0.0426088	938.51	938.508	938.51	714.967	714.911	715.147	3	2	1	http://metlin.scripps.edu/metabo_list.php?mass_min=937.36&mass_max=937.66	7.29669e+06	8.83061e+06	3.6309e+06	2.56175e+06
622	M317T659	4.2477	-10.4069	0.0427347	317.175	317.175	317.176	658.776	658.687	658.869	4	2	2	http://metlin.scripps.edu/metabo_list.php?mass_min=316.03&mass_max=316.33	1.70007e+07	1.95806e+07	4.68252e+06	3.92951e+06
623	M512T766	2.44726	-4.72086	0.0427601	512.307	512.301	512.308	765.625	765.43	766.08	4	2	2	http://metlin.scripps.edu/metabo_list.php?mass_min=511.16&mass_max=511.46	1.26333e+08	1.52116e+08	6.86369e+07	4.51429e+07
624	M367T659	4.31887	-9.62731	0.043067	367.211	367.211	367.211	658.614	658.447	658.786	4	2	2	http://metlin.scripps.edu/metabo_list.php?mass_min=366.06&mass_max=366.36	3.75303e+08	4.36928e+08	1.04103e+08	8.39627e+07
625	M359T371	2.49451	-7.47451	0.0432458	359.113	359.113	359.113	371.073	370.988	371.157	2	2	0	http://metlin.scripps.edu/metabo_list.php?mass_min=357.96&mass_max=358.26	3.01142e+06	3.48609e+06	1.40951e+06	1.19521e+06
626	M1013T750	3.69706	-4.96147	0.0432826	1012.7	1012.7	1012.7	750.423	750.236	750.428	4	2	2	http://metlin.scripps.edu/metabo_list.php?mass_min=1011.55&mass_max=1011.85	7.37166e+06	9.31202e+06	3.0068e+06	1.50589e+06
627	M697T711	2.27937	-4.98543	0.0432957	697.448	697.445	697.45	710.965	710.124	711.776	4	2	2	http://metlin.scripps.edu/metabo_list.php?mass_min=696.3&mass_max=696.6	7.0778e+06	8.11797e+06	4.01247e+06	2.6542e+06
628	M927T762	2.97983	-5.83544	0.0433169	926.653	926.652	926.653	761.843	761.773	761.894	4	2	2	http://metlin.scripps.edu/metabo_list.php?mass_min=925.5&mass_max=925.8	6.94719e+06	7.81651e+06	3.19663e+06	1.75791e+06
629	M900T408	6.24457	-9.20954	0.0434057	900.42	900.42	900.421	408.175	408.105	408.245	2	2	0	http://metlin.scripps.edu/metabo_list.php?mass_min=899.27&mass_max=899.57	2.60318e+06	2.19e+06	455117	312459
630	M544T693	2.07574	-4.65955	0.0434715	544.264	544.263	544.266	693.104	693.054	693.154	2	2	0	http://metlin.scripps.edu/metabo_list.php?mass_min=543.11&mass_max=543.41	1.01818e+07	1.18561e+07	6.20354e+06	4.41335e+06
631	M722T364	2.22594	-5.03635	0.0434822	722.352	722.351	722.352	363.514	363.458	363.571	2	2	0	http://metlin.scripps.edu/metabo_list.php?mass_min=721.2&mass_max=721.5	5.59389e+06	6.66782e+06	3.15572e+06	2.35282e+06
632	M456T848	2.85663	-4.81249	0.0435786	456.335	456.335	456.336	847.853	847.753	847.938	4	2	2	http://metlin.scripps.edu/metabo_list.php?mass_min=455.19&mass_max=455.49	5.46844e+08	6.49459e+08	2.71787e+08	1.46995e+08
633	M472T406	2.91021	-7.10791	0.0436568	472.132	472.132	472.132	405.666	405.666	405.666	1	1	0	http://metlin.scripps.edu/metabo_list.php?mass_min=470.98&mass_max=471.28	1.32184e+06	1.1183e+06	467579	370894
634	M633T371	7.12531	-13.2248	0.0436725	633.165	633.164	633.166	371.229	371.157	371.3	2	2	0	http://metlin.scripps.edu/metabo_list.php?mass_min=632.01&mass_max=632.31	3.1872e+06	3.62568e+06	447020	509132
635	M571T283	68.9389	13.7871	0.043686	571.033	571.033	571.033	282.535	282.535	282.535	1	0	1	http://metlin.scripps.edu/metabo_list.php?mass_min=569.88&mass_max=570.18	19162.2	6129.47	933764	809817
636	M515T85	1.58434	-11.7499	0.0436956	514.877	514.877	514.877	85.2315	85.2315	85.2315	1	0	1	http://metlin.scripps.edu/metabo_list.php?mass_min=513.73&mass_max=514.03	3.51266e+06	3.55992e+06	2.34048e+06	2.12357e+06
637	M501T680	2.12838	-6.9206	0.0437082	500.848	500.848	500.848	679.767	679.469	679.996	4	2	2	http://metlin.scripps.edu/metabo_list.php?mass_min=499.7&mass_max=500	3.95202e+06	3.69447e+06	2.05937e+06	1.53326e+06
638	M777T547	5.56482	4.92504	0.043724	777.396	777.396	777.396	547.426	547.381	547.471	2	0	2	http://metlin.scripps.edu/metabo_list.php?mass_min=776.25&mass_max=776.55	1.28949e+06	4.6847e+06	1.88097e+07	1.44356e+07
639	M654T706	2.71752	-4.67688	0.0437478	654.392	654.391	654.392	706.163	705.635	706.691	2	2	0	http://metlin.scripps.edu/metabo_list.php?mass_min=653.24&mass_max=653.54	2.76398e+06	3.31269e+06	1.42353e+06	812579
640	M565T780	2.38927	-5.43602	0.043762	565.363	565.363	565.363	780.046	779.992	780.1	2	2	0	http://metlin.scripps.edu/metabo_list.php?mass_min=564.21&mass_max=564.51	9.33414e+06	1.05009e+07	5.03687e+06	3.26485e+06
641	M457T848	2.85529	-4.77319	0.0439228	457.337	457.337	457.338	847.853	847.753	847.938	4	2	2	http://metlin.scripps.edu/metabo_list.php?mass_min=456.19&mass_max=456.49	8.12494e+07	9.67334e+07	4.0485e+07	2.18496e+07
642	M201T371	2.66703	-14.2941	0.0439604	201.073	201.066	201.08	370.917	370.383	371.27	4	2	2	http://metlin.scripps.edu/metabo_list.php?mass_min=199.92&mass_max=200.22	2.44493e+07	2.66826e+07	9.63959e+06	9.53225e+06
643	M522T675	2.45661	-7.84557	0.0441565	521.859	521.858	521.859	675.434	675.323	675.525	4	2	2	http://metlin.scripps.edu/metabo_list.php?mass_min=520.71&mass_max=521.01	1.03385e+07	1.09595e+07	5.07734e+06	3.59233e+06
644	M898T848	3.52141	-4.79386	0.0442277	897.645	897.645	897.645	847.758	847.579	847.938	2	2	0	http://metlin.scripps.edu/metabo_list.php?mass_min=896.5&mass_max=896.8	1.04135e+06	1.31432e+06	445484	223472
645	M448T304	3.14815	-12.4813	0.0443247	448.121	448.121	448.122	304.479	304.416	304.543	2	2	0	http://metlin.scripps.edu/metabo_list.php?mass_min=446.97&mass_max=447.27	1.28969e+06	1.26589e+06	474722	337050
646	M445T613	7.52355	13.3636	0.0444061	445.167	445.151	445.185	613.002	610.254	617.478	4	2	2	http://metlin.scripps.edu/metabo_list.php?mass_min=444.02&mass_max=444.32	3.10672e+07	2.76643e+07	2.35168e+08	2.06701e+08
647	M895T485	2.69644	-11.7955	0.0444159	895.285	895.285	895.285	485.054	485.054	485.054	1	1	0	http://metlin.scripps.edu/metabo_list.php?mass_min=894.13&mass_max=894.43	2.98546e+06	3.0507e+06	1.27692e+06	961645
648	M474T511	2.20844	9.59649	0.0444174	474.306	474.306	474.306	510.668	510.525	510.811	2	0	2	http://metlin.scripps.edu/metabo_list.php?mass_min=473.16&mass_max=473.46	543386	691698	1.34039e+06	1.38721e+06
649	M348T371	2.67674	-9.76189	0.0444946	348.107	348.107	348.107	371.084	370.676	371.27	4	2	2	http://metlin.scripps.edu/metabo_list.php?mass_min=346.96&mass_max=347.26	6.93503e+08	7.84161e+08	2.89912e+08	2.62126e+08
650	M810T323	3.43732	-5.22184	0.0446482	810.329	810.329	810.329	323.278	323.272	323.283	2	2	0	http://metlin.scripps.edu/metabo_list.php?mass_min=809.18&mass_max=809.48	4.79378e+06	6.00257e+06	1.98522e+06	1.1557e+06
651	M448T848	2.89138	-4.6949	0.0446993	447.822	447.822	447.822	847.853	847.753	847.938	4	2	2	http://metlin.scripps.edu/metabo_list.php?mass_min=446.67&mass_max=446.97	1.0964e+08	1.31355e+08	5.44805e+07	2.88692e+07
652	M772T649	1.63382	-4.56005	0.0448993	771.515	771.479	771.539	649.274	648.135	651.298	4	2	2	http://metlin.scripps.edu/metabo_list.php?mass_min=770.36&mass_max=770.66	3.42982e+07	3.87257e+07	2.45265e+07	2.01687e+07
653	M384T659	4.16641	-9.34655	0.0449965	384.237	384.237	384.238	658.736	658.447	658.869	4	2	2	http://metlin.scripps.edu/metabo_list.php?mass_min=383.09&mass_max=383.39	5.28609e+08	6.17262e+08	1.51847e+08	1.23179e+08
654	M378T682	2.42997	-4.60364	0.0450079	378.144	378.142	378.144	682.183	682.078	682.284	4	2	2	http://metlin.scripps.edu/metabo_list.php?mass_min=376.99&mass_max=377.29	1.31808e+07	1.59484e+07	7.23922e+06	4.74826e+06
655	M1014T750	3.88054	-4.78253	0.0450196	1013.7	1013.7	1013.7	750.422	750.422	750.422	1	1	0	http://metlin.scripps.edu/metabo_list.php?mass_min=1012.55&mass_max=1012.85	3.78126e+06	4.82495e+06	1.52573e+06	692050
656	M945T375	47.4507	13.9642	0.0451765	945.317	945.317	945.317	374.616	374.491	374.741	2	0	2	http://metlin.scripps.edu/metabo_list.php?mass_min=944.17&mass_max=944.47	326479	251747	1.46796e+07	1.27576e+07
657	M546T710	2.31992	-6.23378	0.0451806	546.335	546.331	546.337	709.536	708.928	710.447	4	2	2	http://metlin.scripps.edu/metabo_list.php?mass_min=545.19&mass_max=545.49	2.81492e+07	3.06975e+07	1.50469e+07	1.0319e+07
658	M1202T390	2.27337	-5.19058	0.0451815	1202.49	1202.49	1202.49	389.748	389.748	389.748	1	1	0	http://metlin.scripps.edu/metabo_list.php?mass_min=1201.34&mass_max=1201.64	4.93245e+07	5.57323e+07	2.7782e+07	1.84298e+07
659	M424T615	3.30328	-6.35335	0.0453461	424.187	424.187	424.187	615.038	615.005	615.058	4	2	2	http://metlin.scripps.edu/metabo_list.php?mass_min=423.04&mass_max=423.34	2.14519e+07	2.60688e+07	8.40575e+06	5.98016e+06
660	M1010T712	4.0381	-6.32604	0.0453544	1010.45	1010.36	1010.51	711.776	710.749	713.618	3	2	1	http://metlin.scripps.edu/metabo_list.php?mass_min=1009.3&mass_max=1009.6	7.33801e+06	9.06291e+06	2.48614e+06	1.57541e+06
661	M894T689	2.47262	-6.61876	0.0453893	893.604	893.604	893.604	689.25	689.249	689.251	2	1	1	http://metlin.scripps.edu/metabo_list.php?mass_min=892.45&mass_max=892.75	2.71677e+06	2.94463e+06	1.37263e+06	917006
662	M802T261	2.53989	8.03163	0.0454076	802.5	802.5	802.5	260.757	260.664	260.85	2	0	2	http://metlin.scripps.edu/metabo_list.php?mass_min=801.35&mass_max=801.65	167709	240493	532778	504008
663	M466T570	3.52675	-8.7989	0.0454087	466.159	466.159	466.164	569.919	569.846	570.073	3	2	1	http://metlin.scripps.edu/metabo_list.php?mass_min=465.01&mass_max=465.31	1.76513e+07	1.67275e+07	6.19524e+06	3.55276e+06
664	M249T332	2.31843	-5.07015	0.0455027	249.149	249.149	249.149	331.55	331.395	331.706	2	0	2	http://metlin.scripps.edu/metabo_list.php?mass_min=248&mass_max=248.3	5.37905e+07	6.464e+07	2.93729e+07	2.17091e+07
665	M338T683	2.47407	-4.65756	0.0455347	338.113	338.113	338.113	682.551	682.484	682.707	4	2	2	http://metlin.scripps.edu/metabo_list.php?mass_min=336.96&mass_max=337.26	4.63782e+07	5.64376e+07	2.50153e+07	1.6542e+07
666	M403T319	6.32716	5.72861	0.0455796	403.125	403.125	403.125	318.913	318.913	318.913	1	0	1	http://metlin.scripps.edu/metabo_list.php?mass_min=401.98&mass_max=402.28	130512	1.17192e+06	4.42952e+06	3.81116e+06
667	M628T491	11.0048	-11.3169	0.0456146	628.335	628.332	628.337	491.482	490.71	492.253	2	2	0	http://metlin.scripps.edu/metabo_list.php?mass_min=627.18&mass_max=627.48	1.38172e+06	1.18056e+06	138218	94614.5
668	M534T403	3.59434	-13.8968	0.0456762	534.091	534.091	534.091	402.979	401.251	404.706	2	2	0	http://metlin.scripps.edu/metabo_list.php?mass_min=532.94&mass_max=533.24	4.04137e+06	4.48412e+06	1.18248e+06	1.18945e+06
669	M500T473	2.78047	10.6043	0.0460539	500.307	500.234	500.379	473.227	463.963	482.377	4	2	2	http://metlin.scripps.edu/metabo_list.php?mass_min=499.16&mass_max=499.46	8.59753e+06	9.32244e+06	2.6373e+07	2.34529e+07
670	M455T318	1.82573	-12.5879	0.0460555	455.15	455.15	455.15	317.673	317.282	317.876	4	2	2	http://metlin.scripps.edu/metabo_list.php?mass_min=454&mass_max=454.3	3.89494e+07	4.18234e+07	2.2322e+07	2.19193e+07
671	M807T373	4.5516	-8.38816	0.0460593	807.322	807.322	807.322	372.549	372.549	372.549	1	1	0	http://metlin.scripps.edu/metabo_list.php?mass_min=806.17&mass_max=806.47	5.77789e+06	6.16119e+06	1.83271e+06	790338
672	M482T841	2.83483	-5.31964	0.0460863	481.828	481.827	481.828	840.894	840.558	840.938	4	2	2	http://metlin.scripps.edu/metabo_list.php?mass_min=480.68&mass_max=480.98	1.93167e+06	2.20587e+06	940861	518674
673	M429T610	6.40379	13.686	0.0461814	429.141	429.14	429.143	610.113	609.918	610.309	2	0	2	http://metlin.scripps.edu/metabo_list.php?mass_min=427.99&mass_max=428.29	113859	110889	763966	675276
674	M552T555	3.44595	-9.47337	0.046219	552.222	552.222	552.222	554.784	554.764	554.803	2	2	0	http://metlin.scripps.edu/metabo_list.php?mass_min=551.07&mass_max=551.37	3.70589e+06	3.5472e+06	1.31229e+06	792527
675	M341T714	1.83647	-13.6891	0.0462489	341.14	341.133	341.141	713.794	713.263	714.967	4	2	2	http://metlin.scripps.edu/metabo_list.php?mass_min=339.99&mass_max=340.29	6.03037e+06	6.44531e+06	3.40242e+06	3.39087e+06
676	M294T348	54.8069	-13.4212	0.0462693	294.113	294.113	294.113	348.239	348.212	348.267	2	2	0	http://metlin.scripps.edu/metabo_list.php?mass_min=292.96&mass_max=293.26	1.77424e+07	2.05357e+07	445832	252586
677	M501T280	35.4741	13.6067	0.04629	501.231	501.231	501.231	279.761	279.731	279.791	2	0	2	http://metlin.scripps.edu/metabo_list.php?mass_min=500.08&mass_max=500.38	302822	243564	1.03828e+07	8.99975e+06
678	M925T762	2.91504	-5.25762	0.0463344	924.646	924.646	924.647	761.549	761.517	761.773	4	2	2	http://metlin.scripps.edu/metabo_list.php?mass_min=923.5&mass_max=923.8	4.51939e+07	5.18553e+07	2.17128e+07	1.15798e+07
679	M514T827	3.0784	-4.94362	0.0464057	513.861	513.86	513.861	826.655	826.563	826.789	4	2	2	http://metlin.scripps.edu/metabo_list.php?mass_min=512.71&mass_max=513.01	1.58508e+07	1.9796e+07	7.21603e+06	4.36362e+06
680	M427T610	14.3842	13.6153	0.0464962	427.14	427.14	427.14	610.282	610.254	610.309	2	0	2	http://metlin.scripps.edu/metabo_list.php?mass_min=425.99&mass_max=426.29	1.33196e+06	1.2605e+06	1.9919e+07	1.73716e+07
681	M240T487	1.52114	-4.70842	0.0465344	240.105	240.099	240.114	487.307	485.303	490.71	4	2	2	http://metlin.scripps.edu/metabo_list.php?mass_min=238.96&mass_max=239.26	1.46754e+07	1.30927e+07	9.75542e+06	8.49948e+06
682	M883T768	2.90454	-6.70743	0.0465359	882.626	882.626	882.627	767.766	767.696	767.892	4	2	2	http://metlin.scripps.edu/metabo_list.php?mass_min=881.48&mass_max=881.78	1.47883e+07	1.60996e+07	6.67716e+06	3.95719e+06
683	M427T855	2.9043	-4.53824	0.0465578	426.812	426.812	426.812	855.268	855.103	855.366	4	2	2	http://metlin.scripps.edu/metabo_list.php?mass_min=425.66&mass_max=425.96	2.16189e+07	2.61943e+07	1.08193e+07	5.64361e+06
684	M495T471	17.9871	-13.508	0.0466195	495.259	495.259	495.26	471.387	471.32	471.455	2	2	0	http://metlin.scripps.edu/metabo_list.php?mass_min=494.11&mass_max=494.41	4.23328e+06	4.86907e+06	239261	266789
685	M854T855	3.24387	-4.63709	0.0466958	853.619	853.619	853.619	855.103	855.035	855.353	3	2	1	http://metlin.scripps.edu/metabo_list.php?mass_min=852.47&mass_max=852.77	2.13602e+06	2.58236e+06	999393	455160
686	M740T842	3.11098	-5.40439	0.0467068	740.464	740.463	740.464	842.477	842.466	842.487	2	2	0	http://metlin.scripps.edu/metabo_list.php?mass_min=739.31&mass_max=739.61	2.25742e+06	2.58056e+06	1.03475e+06	520385
687	M528T458	3.1385	-5.71073	0.0467336	528.234	528.234	528.234	458.416	458.416	458.416	1	1	0	http://metlin.scripps.edu/metabo_list.php?mass_min=527.08&mass_max=527.38	9.61161e+06	1.18196e+07	4.05914e+06	2.76935e+06
688	M726T373	4.51077	-10.4578	0.0468318	726.248	726.248	726.248	373.345	373.345	373.345	1	1	0	http://metlin.scripps.edu/metabo_list.php?mass_min=725.1&mass_max=725.4	1.43063e+06	1.38034e+06	413120	210050
689	M314T122	17.0924	11.2816	0.0468751	314.018	314.018	314.018	121.94	121.94	121.94	1	0	1	http://metlin.scripps.edu/metabo_list.php?mass_min=312.87&mass_max=313.17	13244.5	23785.7	290590	342348
690	M224T658	4.6221	-11.1056	0.0469648	223.596	223.596	223.597	658.409	658.37	658.447	2	2	0	http://metlin.scripps.edu/metabo_list.php?mass_min=222.45&mass_max=222.75	1.80178e+06	2.06898e+06	447052	390393
691	M258T602	6.95316	-10.4234	0.0470716	258.111	258.111	258.111	602.456	602	602.47	3	2	1	http://metlin.scripps.edu/metabo_list.php?mass_min=256.96&mass_max=257.26	1.30441e+07	1.11173e+07	1.97533e+06	1.49955e+06
692	M696T850	2.87881	-4.45251	0.0472086	696.438	696.438	696.438	850.046	849.875	850.151	3	2	1	http://metlin.scripps.edu/metabo_list.php?mass_min=695.29&mass_max=695.59	6.85294e+06	8.38598e+06	3.459e+06	1.83448e+06
693	M529T565	3.61518	-6.12094	0.0472443	529.236	529.236	529.237	564.986	561.583	567.263	4	2	2	http://metlin.scripps.edu/metabo_list.php?mass_min=528.09&mass_max=528.39	3.21495e+07	2.8771e+07	1.16046e+07	5.24674e+06
694	M215T371	2.25238	-7.48873	0.0472626	215.084	215.078	215.089	370.613	370.017	371.3	4	2	2	http://metlin.scripps.edu/metabo_list.php?mass_min=213.93&mass_max=214.23	4.97394e+07	5.70623e+07	2.523e+07	2.21873e+07
695	M723T493	4.19631	4.4943	0.0472937	723.329	723.329	723.329	493.443	493.353	493.534	2	0	2	http://metlin.scripps.edu/metabo_list.php?mass_min=722.18&mass_max=722.48	189362	619246	1.88758e+06	1.50559e+06
696	M381T764	1.38561	5.52554	0.0473942	381.108	381.108	381.108	763.749	763.749	763.749	1	1	0	http://metlin.scripps.edu/metabo_list.php?mass_min=379.96&mass_max=380.26	1.46553e+06	1.3002e+06	1.96592e+06	1.86631e+06
697	M726T409	2.44218	-9.3855	0.0474116	726.286	726.285	726.289	408.733	408.569	409.085	4	2	2	http://metlin.scripps.edu/metabo_list.php?mass_min=725.14&mass_max=725.44	5.26217e+06	4.6638e+06	2.12163e+06	1.94275e+06
698	M339T682	2.33537	-4.60243	0.0474996	339.118	339.118	339.121	681.971	681.567	682.172	3	2	1	http://metlin.scripps.edu/metabo_list.php?mass_min=337.97&mass_max=338.27	9.31695e+06	1.09052e+07	5.30287e+06	3.35623e+06
699	M303T468	4.42864	-10.8783	0.0476053	303.155	303.155	303.155	467.875	467.808	467.943	2	2	0	http://metlin.scripps.edu/metabo_list.php?mass_min=302&mass_max=302.3	5.20173e+06	5.9794e+06	1.3467e+06	1.17803e+06
700	M547T387	3.1905	-10.889	0.0477239	547.259	547.259	547.26	387.275	387.204	387.345	2	2	0	http://metlin.scripps.edu/metabo_list.php?mass_min=546.11&mass_max=546.41	5.55115e+06	5.40595e+06	2.05486e+06	1.37943e+06
701	M638T808	3.62857	-4.46849	0.0478632	638.393	638.393	638.394	808.251	808.135	808.366	2	2	0	http://metlin.scripps.edu/metabo_list.php?mass_min=637.24&mass_max=637.54	1.5259e+06	1.94741e+06	665273	291938
702	M851T855	3.13258	-4.41862	0.0478719	850.61	850.61	850.61	855.069	855.03	855.184	4	2	2	http://metlin.scripps.edu/metabo_list.php?mass_min=849.46&mass_max=849.76	7.72196e+07	9.5493e+07	3.72387e+07	1.78955e+07
703	M417T854	2.78997	-4.46667	0.0479169	417.284	417.274	417.287	853.923	853.738	854.511	4	2	2	http://metlin.scripps.edu/metabo_list.php?mass_min=416.13&mass_max=416.43	2.01976e+07	2.50665e+07	1.02662e+07	5.95763e+06
704	M483T833	2.90334	-4.81542	0.0481218	483.334	483.333	483.334	833.248	833.244	833.251	2	2	0	http://metlin.scripps.edu/metabo_list.php?mass_min=482.18&mass_max=482.48	6.58224e+06	8.20881e+06	3.14076e+06	1.95373e+06
705	M231T368	3.52235	-9.5426	0.0481706	231.174	231.174	231.175	368.174	367.398	368.175	3	2	1	http://metlin.scripps.edu/metabo_list.php?mass_min=230.02&mass_max=230.32	3.05119e+06	2.92889e+06	1.06476e+06	632990
706	M852T855	3.10721	-4.42502	0.0482422	851.614	851.613	851.614	855.069	855.03	855.184	4	2	2	http://metlin.scripps.edu/metabo_list.php?mass_min=850.46&mass_max=850.76	3.53306e+07	4.3454e+07	1.71443e+07	8.21113e+06
707	M703T497	45.5842	11.8275	0.0482666	703.395	703.395	703.395	497.384	497.322	497.445	2	0	2	http://metlin.scripps.edu/metabo_list.php?mass_min=702.25&mass_max=702.55	445351	1.63362e+06	5.12572e+07	4.35111e+07
708	M601T808	2.82047	-4.50139	0.0482846	601.427	601.425	601.429	807.617	807.502	807.732	2	2	0	http://metlin.scripps.edu/metabo_list.php?mass_min=600.28&mass_max=600.58	1.26904e+07	1.52834e+07	6.48919e+06	3.42892e+06
709	M545T820	3.15738	-5.30253	0.0483698	545.39	545.389	545.39	819.917	819.878	819.929	4	2	2	http://metlin.scripps.edu/metabo_list.php?mass_min=544.24&mass_max=544.54	1.63798e+07	2.03968e+07	7.0811e+06	4.56671e+06
710	M705T497	82.4169	12.3022	0.048413	705.4	705.4	705.4	497.384	497.322	497.445	2	0	2	http://metlin.scripps.edu/metabo_list.php?mass_min=704.25&mass_max=704.55	15480.7	122653	6.14623e+06	5.23835e+06
711	M787T682	3.3287	-5.00639	0.0484414	786.828	786.828	786.828	682.484	682.484	682.484	1	1	0	http://metlin.scripps.edu/metabo_list.php?mass_min=785.68&mass_max=785.98	1.2274e+07	1.54819e+07	5.25924e+06	3.07913e+06
712	M798T781	3.16382	-5.23451	0.0485625	797.523	797.523	797.523	781.057	780.946	781.127	3	2	1	http://metlin.scripps.edu/metabo_list.php?mass_min=796.37&mass_max=796.67	8.89901e+06	1.02396e+07	4.08005e+06	1.96917e+06
713	M828T700	2.87873	-6.58349	0.0486651	827.523	827.523	827.523	699.817	699.817	699.817	1	1	0	http://metlin.scripps.edu/metabo_list.php?mass_min=826.37&mass_max=826.67	3.70005e+06	4.02846e+06	1.68844e+06	996263
714	M356T261	2.23722	6.02682	0.0486776	356.16	356.16	356.161	261.389	261.352	261.532	4	2	2	http://metlin.scripps.edu/metabo_list.php?mass_min=355.01&mass_max=355.31	1.0286e+08	1.48482e+08	2.93206e+08	2.69103e+08
715	M630T391	47.8715	-12.4574	0.048688	629.73	629.73	629.73	391.317	391.317	391.317	1	1	0	http://metlin.scripps.edu/metabo_list.php?mass_min=628.58&mass_max=628.88	1.10885e+06	947989	29504.3	13461.5
716	M552T739	3.21284	-8.87586	0.0487073	551.883	551.883	551.884	738.681	738.663	738.699	2	2	0	http://metlin.scripps.edu/metabo_list.php?mass_min=550.73&mass_max=551.03	1.64789e+06	1.72676e+06	650034	400329
717	M928T762	3.12105	-5.93272	0.0488264	927.655	927.655	927.656	761.773	761.573	761.836	3	2	1	http://metlin.scripps.edu/metabo_list.php?mass_min=926.51&mass_max=926.81	1.51972e+06	1.69396e+06	676980	352698
718	M653T859	2.80606	-4.41424	0.0488318	653.415	653.414	653.415	858.731	858.642	858.74	3	2	1	http://metlin.scripps.edu/metabo_list.php?mass_min=652.26&mass_max=652.56	5.40757e+06	6.56915e+06	2.78605e+06	1.48211e+06
719	M388T382	2.02563	-4.86644	0.0489032	388.223	388.214	388.242	382.426	381.002	386.205	4	2	2	http://metlin.scripps.edu/metabo_list.php?mass_min=387.07&mass_max=387.37	3.12112e+07	3.5192e+07	1.92141e+07	1.35674e+07
720	M942T407	9.97281	-9.5925	0.0489907	942.409	942.407	942.411	407.365	407.275	407.455	2	2	0	http://metlin.scripps.edu/metabo_list.php?mass_min=941.26&mass_max=941.56	4.1857e+06	3.49102e+06	479587	290179
721	M878T848	3.33114	-4.52696	0.0490006	877.61	877.609	877.61	847.898	847.753	847.938	3	2	1	http://metlin.scripps.edu/metabo_list.php?mass_min=876.46&mass_max=876.76	1.82006e+06	2.31583e+06	822644	418937
722	M498T750	2.46125	-7.85647	0.0490151	498.336	498.336	498.337	750.11	750.108	750.112	2	2	0	http://metlin.scripps.edu/metabo_list.php?mass_min=497.19&mass_max=497.49	1.29875e+07	1.36969e+07	6.3647e+06	4.47711e+06
723	M531T755	1.66058	-4.59234	0.0490162	531.307	531.296	531.322	755.488	754.426	757.02	4	2	2	http://metlin.scripps.edu/metabo_list.php?mass_min=530.16&mass_max=530.46	7.09007e+06	7.89204e+06	5.02128e+06	4.00093e+06
724	M495T683	2.46643	-4.54672	0.0490317	495.23	495.23	495.23	682.551	682.484	682.707	4	2	2	http://metlin.scripps.edu/metabo_list.php?mass_min=494.08&mass_max=494.38	2.74007e+09	3.36175e+09	1.48706e+09	9.86885e+08
725	M439T848	2.89339	-4.78235	0.0490651	439.308	439.308	439.309	847.938	847.898	848.078	3	2	1	http://metlin.scripps.edu/metabo_list.php?mass_min=438.16&mass_max=438.46	1.25764e+07	1.4771e+07	6.24128e+06	3.21041e+06
726	M257T678	2.36064	-5.33033	0.0490694	257.147	257.143	257.152	677.801	677.407	678.195	2	2	0	http://metlin.scripps.edu/metabo_list.php?mass_min=256&mass_max=256.3	5.73063e+06	6.89402e+06	3.03111e+06	2.31687e+06
727	M412T488	2.43438	-5.48671	0.0490847	412.185	412.184	412.186	488.332	488.005	488.526	4	2	2	http://metlin.scripps.edu/metabo_list.php?mass_min=411.03&mass_max=411.33	9.91899e+07	8.23989e+07	4.22551e+07	3.23382e+07
728	M308T404	1.18859	7.00528	0.0491338	308.137	308.136	308.138	404.136	403.844	404.428	2	0	2	http://metlin.scripps.edu/metabo_list.php?mass_min=306.99&mass_max=307.29	5.73257e+06	5.45642e+06	6.70968e+06	6.58939e+06
729	M385T659	4.22044	-9.12841	0.0491348	385.241	385.241	385.241	658.501	658.447	658.687	4	2	2	http://metlin.scripps.edu/metabo_list.php?mass_min=384.09&mass_max=384.39	1.1815e+08	1.38732e+08	3.34944e+07	2.73717e+07
730	M684T453	2.65166	7.41293	0.0492475	684.323	684.322	684.324	452.817	452.42	453.213	2	0	2	http://metlin.scripps.edu/metabo_list.php?mass_min=683.17&mass_max=683.47	1.51486e+06	2.30364e+06	4.90325e+06	5.22211e+06
731	M247T715	1.64765	-4.44527	0.0492602	247.169	247.169	247.169	715.029	714.882	715.283	4	2	2	http://metlin.scripps.edu/metabo_list.php?mass_min=246.02&mass_max=246.32	3.03317e+07	3.47104e+07	2.16023e+07	1.78734e+07
732	M797T531	4.10046	4.37537	0.0493064	797.363	797.363	797.363	531.109	527.241	531.247	3	1	2	http://metlin.scripps.edu/metabo_list.php?mass_min=796.21&mass_max=796.51	1.57671e+06	4.44073e+06	1.39167e+07	1.07576e+07
733	M834T855	3.05744	-4.3263	0.0495053	833.584	833.584	833.584	855.103	855.03	855.366	3	2	1	http://metlin.scripps.edu/metabo_list.php?mass_min=832.43&mass_max=832.73	3.91893e+06	4.89348e+06	1.92309e+06	959190
734	M1042T682	2.70569	-4.38875	0.0495547	1042.44	1042.44	1042.44	682.484	682.194	682.596	3	2	1	http://metlin.scripps.edu/metabo_list.php?mass_min=1041.29&mass_max=1041.59	9.16743e+06	1.13808e+07	4.77356e+06	2.82089e+06
735	M428T610	16.9129	12.8151	0.0495764	428.144	428.144	428.144	610.282	610.254	610.309	2	0	2	http://metlin.scripps.edu/metabo_list.php?mass_min=426.99&mass_max=427.29	282104	283053	5.13011e+06	4.42834e+06
736	M839T774	2.86344	-5.48109	0.049614	838.6	838.6	838.6	774.237	774.05	774.314	4	2	2	http://metlin.scripps.edu/metabo_list.php?mass_min=837.45&mass_max=837.75	3.06138e+07	3.45245e+07	1.47103e+07	8.03801e+06
737	M426T855	2.90969	-4.34308	0.0497197	425.809	425.809	425.809	855.268	855.103	855.366	4	2	2	http://metlin.scripps.edu/metabo_list.php?mass_min=424.66&mass_max=424.96	1.63605e+08	2.00948e+08	8.2896e+07	4.2393e+07
738	M1203T390	2.26286	-4.91968	0.0497738	1203.5	1203.5	1203.5	390.149	390.149	390.149	1	0	1	http://metlin.scripps.edu/metabo_list.php?mass_min=1202.35&mass_max=1202.65	3.83016e+07	4.35263e+07	2.19168e+07	1.42444e+07
739	M485T442	1.89176	-7.26059	0.0497825	485.168	485.141	485.195	441.582	435.828	447.335	2	1	1	http://metlin.scripps.edu/metabo_list.php?mass_min=484.02&mass_max=484.32	4.35675e+06	3.86312e+06	2.07114e+06	2.27396e+06
740	M886T317	2.78454	-7.37402	0.0499168	886.307	886.307	886.307	317.243	317.243	317.243	1	1	0	http://metlin.scripps.edu/metabo_list.php?mass_min=885.16&mass_max=885.46	1.62512e+08	1.91025e+08	6.92062e+07	5.77577e+07
741	M692T349	15.9865	-11.4957	0.0500025	692.259	692.259	692.259	349.221	349.221	349.221	1	1	0	http://metlin.scripps.edu/metabo_list.php?mass_min=691.11&mass_max=691.41	4.52425e+06	5.31809e+06	367038	248628
742	M239T611	4.91339	12.6795	0.0500309	239.09	239.09	239.091	610.629	610.59	610.667	2	0	2	http://metlin.scripps.edu/metabo_list.php?mass_min=237.94&mass_max=238.24	1.76755e+06	1.78702e+06	9.28094e+06	8.18403e+06
743	M446T382	2.09557	-6.07587	0.0500934	446.19	446.19	446.191	381.961	381.884	382.038	2	2	0	http://metlin.scripps.edu/metabo_list.php?mass_min=445.04&mass_max=445.34	7.9612e+06	8.6096e+06	4.58872e+06	3.31883e+06
744	M884T768	2.99155	-6.60961	0.0501889	883.629	883.629	883.629	767.85	767.808	767.892	2	2	0	http://metlin.scripps.edu/metabo_list.php?mass_min=882.48&mass_max=882.78	3.14176e+06	3.41754e+06	1.39648e+06	796132
745	M251T710	1.2018	6.11088	0.0503664	251.128	251.127	251.128	710.336	710.124	710.548	2	0	2	http://metlin.scripps.edu/metabo_list.php?mass_min=249.98&mass_max=250.28	3.20687e+06	3.02319e+06	3.78999e+06	3.6973e+06
746	M511T765	2.20316	-4.28778	0.0503812	511.302	511.297	511.305	765.192	764.451	765.344	4	2	2	http://metlin.scripps.edu/metabo_list.php?mass_min=510.15&mass_max=510.45	3.88831e+08	4.66888e+08	2.32233e+08	1.56171e+08
747	M270T503	2.78949	-11.0536	0.0504345	270.206	270.206	270.206	502.881	502.881	502.881	1	1	0	http://metlin.scripps.edu/metabo_list.php?mass_min=269.06&mass_max=269.36	4.36589e+06	4.28076e+06	1.79714e+06	1.30259e+06
748	M503T834	2.92001	-4.51876	0.0504586	502.838	502.837	502.838	833.533	833.343	833.885	4	2	2	http://metlin.scripps.edu/metabo_list.php?mass_min=501.69&mass_max=501.99	7.78312e+06	9.79439e+06	3.79991e+06	2.21976e+06
749	M606T536	78.9479	12.5454	0.0504608	606.232	606.23	606.234	535.507	534.821	536.131	4	2	2	http://metlin.scripps.edu/metabo_list.php?mass_min=605.08&mass_max=605.38	614996	867133	6.31082e+07	5.39028e+07
750	M435T855	2.84006	-4.29281	0.0505223	435.324	435.324	435.324	855.069	855.03	855.184	4	2	2	http://metlin.scripps.edu/metabo_list.php?mass_min=434.17&mass_max=434.47	7.34057e+07	9.03596e+07	3.78238e+07	1.98387e+07
751	M854T712	2.24143	-4.37298	0.0505603	854.447	854.446	854.447	711.913	711.461	712.355	4	2	2	http://metlin.scripps.edu/metabo_list.php?mass_min=853.3&mass_max=853.6	8.71205e+06	1.05654e+07	5.09498e+06	3.50553e+06
752	M1061T694	6.42493	-5.27468	0.0506592	1060.51	1060.51	1060.51	694.119	694.119	694.119	1	1	0	http://metlin.scripps.edu/metabo_list.php?mass_min=1059.36&mass_max=1059.66	3.58491e+06	4.72217e+06	991055	301889
753	M475T319	1.51416	-8.96035	0.050689	475.207	475.207	475.207	318.829	318.829	318.829	1	1	0	http://metlin.scripps.edu/metabo_list.php?mass_min=474.06&mass_max=474.36	4.80889e+06	5.17185e+06	3.34901e+06	3.24261e+06
754	M865T768	2.65252	-6.57988	0.0507406	864.597	864.596	864.597	767.85	767.808	767.892	2	2	0	http://metlin.scripps.edu/metabo_list.php?mass_min=863.45&mass_max=863.75	3.78649e+06	4.09696e+06	1.82543e+06	1.14663e+06
755	M448T692	39.8011	-12.2135	0.0507556	448.24	448.24	448.24	692.46	692.41	692.51	2	2	0	http://metlin.scripps.edu/metabo_list.php?mass_min=447.09&mass_max=447.39	2.83838e+06	3.3294e+06	95315	59650
756	M554T471	13.2564	-12.5128	0.0507644	554.263	554.247	554.266	471.145	470.997	471.524	4	2	2	http://metlin.scripps.edu/metabo_list.php?mass_min=553.11&mass_max=553.41	1.76041e+07	2.04132e+07	1.42733e+06	1.44051e+06
757	M494T683	2.46882	-4.49279	0.0507868	494.229	494.228	494.229	682.551	682.484	682.707	4	2	2	http://metlin.scripps.edu/metabo_list.php?mass_min=493.08&mass_max=493.38	8.85786e+09	1.09127e+10	4.81521e+09	3.19288e+09
758	M392T682	2.40515	-4.47813	0.0507963	392.163	392.161	392.167	682.495	682.392	682.596	4	2	2	http://metlin.scripps.edu/metabo_list.php?mass_min=391.01&mass_max=391.31	1.68129e+08	2.06364e+08	9.30603e+07	6.26446e+07
759	M837T774	2.87365	-5.46178	0.0508247	836.594	836.594	836.594	774.237	774.05	774.314	4	2	2	http://metlin.scripps.edu/metabo_list.php?mass_min=835.44&mass_max=835.74	2.37779e+08	2.6795e+08	1.14141e+08	6.18478e+07
760	M969T755	3.07651	-5.32898	0.0508449	968.673	968.672	968.673	755.479	755.449	755.498	3	2	1	http://metlin.scripps.edu/metabo_list.php?mass_min=967.52&mass_max=967.82	2.31969e+07	2.64132e+07	1.07617e+07	5.36373e+06
761	M798T496	24.7976	7.94649	0.0508898	798.291	798.29	798.291	496.44	496.377	496.503	2	0	2	http://metlin.scripps.edu/metabo_list.php?mass_min=797.14&mass_max=797.44	0	160483	2.2163e+06	1.76329e+06
762	M972T392	379.496	12.4824	0.0508921	972.337	972.337	972.337	391.86	391.685	392.036	2	0	2	http://metlin.scripps.edu/metabo_list.php?mass_min=971.19&mass_max=971.49	15513.7	13899.5	6.02705e+06	5.13517e+06
763	M213T682	1.67786	-5.01893	0.0509029	213.068	213.068	213.069	682.071	681.971	682.172	2	2	0	http://metlin.scripps.edu/metabo_list.php?mass_min=211.92&mass_max=212.22	4.4635e+07	5.1105e+07	3.06239e+07	2.64368e+07
764	M219T85	1.60262	4.51	0.0509045	218.972	218.947	219	85.4583	84.2462	85.9286	4	2	2	http://metlin.scripps.edu/metabo_list.php?mass_min=217.82&mass_max=218.12	1.64187e+06	1.32891e+06	2.5026e+06	2.25842e+06
765	M496T683	2.46109	-4.4369	0.050913	496.233	496.232	496.233	682.551	682.484	682.707	4	2	2	http://metlin.scripps.edu/metabo_list.php?mass_min=495.08&mass_max=495.38	5.07034e+08	6.246e+08	2.77616e+08	1.82194e+08
766	M434T855	2.81625	-4.31567	0.0509422	434.323	434.322	434.323	855.069	855.03	855.184	4	2	2	http://metlin.scripps.edu/metabo_list.php?mass_min=433.17&mass_max=433.47	5.37989e+08	6.56582e+08	2.78798e+08	1.45373e+08
767	M411T375	2.45353	-4.86821	0.0509641	411.174	411.174	411.174	375.098	375.06	375.235	4	2	2	http://metlin.scripps.edu/metabo_list.php?mass_min=410.02&mass_max=410.32	1.96613e+08	1.71497e+08	9.35629e+07	5.64697e+07
768	M443T480	33.0879	9.09007	0.0511949	443.103	443.103	443.103	480.112	480.063	480.161	2	0	2	http://metlin.scripps.edu/metabo_list.php?mass_min=441.95&mass_max=442.25	186577	4345.67	3.48303e+06	2.83418e+06
769	M838T774	2.8813	-5.52595	0.0512166	837.597	837.597	837.597	774.237	774.05	774.314	4	2	2	http://metlin.scripps.edu/metabo_list.php?mass_min=836.45&mass_max=836.75	1.07236e+08	1.20463e+08	5.12273e+07	2.77992e+07
770	M302T432	6.45457	-11.1568	0.0513029	302.071	302.07	302.072	432.055	431.893	432.218	2	2	0	http://metlin.scripps.edu/metabo_list.php?mass_min=300.92&mass_max=301.22	6.43184e+06	5.5358e+06	858408	995726
771	M884T367	2.08978	-5.49572	0.0513164	884.352	884.347	884.358	366.72	365.764	367.811	4	2	2	http://metlin.scripps.edu/metabo_list.php?mass_min=883.2&mass_max=883.5	2.23132e+07	2.45064e+07	1.31338e+07	9.27029e+06
772	M825T699	2.50714	-5.59432	0.051362	824.584	824.584	824.584	699.474	699.273	699.526	4	2	2	http://metlin.scripps.edu/metabo_list.php?mass_min=823.43&mass_max=823.73	2.41059e+07	2.67559e+07	1.25333e+07	7.75343e+06
773	M325T683	2.57127	-4.63694	0.05144	325.137	325.137	325.137	683.109	683.109	683.109	1	1	0	http://metlin.scripps.edu/metabo_list.php?mass_min=323.99&mass_max=324.29	4.8644e+06	6.02417e+06	2.53987e+06	1.69484e+06
774	M609T777	2.59127	-6.00521	0.0514496	609.357	609.354	609.36	777.126	775.829	778.53	4	2	2	http://metlin.scripps.edu/metabo_list.php?mass_min=608.21&mass_max=608.51	1.64477e+07	1.80407e+07	8.22797e+06	5.08151e+06
775	M790T862	2.35223	-4.30068	0.0514636	789.571	789.568	789.578	862.4	862.349	862.551	3	2	1	http://metlin.scripps.edu/metabo_list.php?mass_min=788.42&mass_max=788.72	9.88314e+06	1.2087e+07	5.64057e+06	3.69955e+06
776	M454T318	1.80509	-11.1512	0.0515001	454.146	454.146	454.146	317.673	317.282	317.876	4	2	2	http://metlin.scripps.edu/metabo_list.php?mass_min=453&mass_max=453.3	1.58345e+08	1.71386e+08	9.23165e+07	9.03505e+07
777	M872T315	2.18589	-4.31796	0.0515091	872.292	872.292	872.292	314.868	313.694	315.885	4	2	2	http://metlin.scripps.edu/metabo_list.php?mass_min=871.14&mass_max=871.44	1.27289e+07	1.54017e+07	7.59086e+06	5.27832e+06
778	M437T855	2.84307	-4.2969	0.0515188	436.799	436.799	436.799	855.032	854.848	855.103	4	2	2	http://metlin.scripps.edu/metabo_list.php?mass_min=435.65&mass_max=435.95	1.87313e+07	2.28839e+07	9.67322e+06	4.96422e+06
779	M853T855	3.18062	-4.25696	0.0515372	852.616	852.616	852.616	855.069	855.03	855.184	4	2	2	http://metlin.scripps.edu/metabo_list.php?mass_min=851.47&mass_max=851.77	1.01206e+07	1.26064e+07	4.91605e+06	2.22941e+06
780	M416T863	2.72372	-4.32525	0.0516099	415.788	415.786	415.788	862.703	862.292	862.874	4	2	2	http://metlin.scripps.edu/metabo_list.php?mass_min=414.64&mass_max=414.94	2.05022e+06	2.48159e+06	1.08371e+06	580125
781	M303T153	2.04572	-4.44567	0.0516172	303.175	303.168	303.176	153.091	152.503	153.262	4	2	2	http://metlin.scripps.edu/metabo_list.php?mass_min=302.03&mass_max=302.33	3.77916e+06	3.27547e+06	2.04216e+06	1.40633e+06
782	M336T369	1.95723	-8.12408	0.0516532	336.124	336.118	336.131	369.364	367.859	370.643	4	2	2	http://metlin.scripps.edu/metabo_list.php?mass_min=334.97&mass_max=335.27	1.517e+07	1.57636e+07	8.78492e+06	7.01985e+06
783	M663T987	1.06274	7.29015	0.0516617	663.452	663.452	663.452	987.457	987.208	987.706	2	0	2	http://metlin.scripps.edu/metabo_list.php?mass_min=662.3&mass_max=662.6	2.02131e+07	2.00861e+07	2.12525e+07	2.15752e+07
784	M236T323	1.85887	-4.27557	0.0517491	236.103	236.103	236.104	323.33	323.272	323.423	4	2	2	http://metlin.scripps.edu/metabo_list.php?mass_min=234.95&mass_max=235.25	2.3478e+07	2.71173e+07	1.56494e+07	1.1569e+07
785	M453T747	2.5513	-4.93015	0.0518902	453.332	453.331	453.334	747.413	747.201	747.613	4	2	2	http://metlin.scripps.edu/metabo_list.php?mass_min=452.18&mass_max=452.48	3.46134e+08	3.96193e+08	1.83807e+08	1.07153e+08
786	M477T755	2.60092	-5.97949	0.0519729	476.828	476.828	476.828	755.474	755.38	755.795	4	2	2	http://metlin.scripps.edu/metabo_list.php?mass_min=475.68&mass_max=475.98	1.03327e+07	1.13376e+07	5.16168e+06	3.17012e+06
787	M291T289	2.10834	-4.46515	0.0520166	291.157	291.157	291.157	289.019	280.315	289.947	4	2	2	http://metlin.scripps.edu/metabo_list.php?mass_min=290.01&mass_max=290.31	7.59408e+07	6.30179e+07	3.79706e+07	2.79384e+07
788	M654T780	2.82175	-4.83459	0.0520707	654.422	654.407	654.423	779.782	778.202	779.992	3	2	1	http://metlin.scripps.edu/metabo_list.php?mass_min=653.27&mass_max=653.57	2.99892e+06	3.48095e+06	1.50752e+06	788887
789	M425T615	3.11404	-5.8244	0.0520817	425.19	425.19	425.19	615.056	615.056	615.056	1	1	0	http://metlin.scripps.edu/metabo_list.php?mass_min=424.04&mass_max=424.34	5.57323e+06	6.85852e+06	2.33062e+06	1.66155e+06
790	M267T682	2.58747	-4.39209	0.0520995	267.114	267.112	267.116	682.495	682.392	682.596	4	2	2	http://metlin.scripps.edu/metabo_list.php?mass_min=265.96&mass_max=266.26	1.34189e+07	1.66942e+07	7.13875e+06	4.4993e+06
791	M554T317	2.14231	-11.8771	0.0521509	554.112	554.112	554.112	316.904	316.882	316.927	2	2	0	http://metlin.scripps.edu/metabo_list.php?mass_min=552.96&mass_max=553.26	1.9603e+06	1.94734e+06	999489	824538
792	M418T316	3.24333	-7.03663	0.0521588	418.15	418.149	418.151	315.746	314.002	316.882	4	2	2	http://metlin.scripps.edu/metabo_list.php?mass_min=417&mass_max=417.3	3.35255e+07	4.02378e+07	1.27424e+07	1.00006e+07
793	M622T536	7.03212	7.42764	0.0521875	622.209	622.207	622.211	535.565	535.485	535.644	2	0	2	http://metlin.scripps.edu/metabo_list.php?mass_min=621.06&mass_max=621.36	228889	413987	2.50448e+06	2.0163e+06
794	M410T375	2.4604	-5.08199	0.0521918	410.171	410.171	410.171	375.183	375.065	375.38	4	2	2	http://metlin.scripps.edu/metabo_list.php?mass_min=409.02&mass_max=409.32	7.95941e+08	7.03481e+08	3.79077e+08	2.30346e+08
795	M652T859	2.64203	-4.21849	0.0522724	652.412	652.388	652.412	858.524	858.391	859.256	4	2	2	http://metlin.scripps.edu/metabo_list.php?mass_min=651.26&mass_max=651.56	1.70658e+07	2.11826e+07	9.16236e+06	5.31453e+06
796	M610T767	1.63801	-4.21181	0.0525028	610.264	610.263	610.265	766.577	766.299	766.856	2	2	0	http://metlin.scripps.edu/metabo_list.php?mass_min=609.11&mass_max=609.41	2.53546e+06	2.87607e+06	1.83519e+06	1.46854e+06
797	M926T762	2.92811	-5.61566	0.0526394	925.65	925.649	925.65	761.673	761.525	761.836	4	2	2	http://metlin.scripps.edu/metabo_list.php?mass_min=924.5&mass_max=924.8	2.26009e+07	2.5269e+07	1.06434e+07	5.70494e+06
798	M354T683	2.40812	-4.20876	0.0527072	354.136	354.135	354.137	682.651	682.484	683.134	4	2	2	http://metlin.scripps.edu/metabo_list.php?mass_min=352.99&mass_max=353.29	2.10664e+07	2.58645e+07	1.19518e+07	7.53681e+06
799	M885T317	2.77213	-7.11399	0.0527245	885.304	885.304	885.304	316.882	316.633	317.243	3	2	1	http://metlin.scripps.edu/metabo_list.php?mass_min=884.15&mass_max=884.45	3.23273e+08	3.82171e+08	1.38959e+08	1.15518e+08
800	M227T682	2.49663	-4.44605	0.0528151	227.081	227.081	227.082	682.339	682.078	682.596	4	2	2	http://metlin.scripps.edu/metabo_list.php?mass_min=225.93&mass_max=226.23	6.58301e+07	8.15875e+07	3.55808e+07	2.34659e+07
801	M398T283	9.52589	8.9986	0.0528593	398.023	398.023	398.023	282.535	282.535	282.535	1	0	1	http://metlin.scripps.edu/metabo_list.php?mass_min=396.87&mass_max=397.17	43417.8	72034.7	602683	497105
802	M711T392	9.69852	-7.30226	0.0529005	711.257	711.256	711.257	391.696	391.63	391.762	2	2	0	http://metlin.scripps.edu/metabo_list.php?mass_min=710.11&mass_max=710.41	5.58599e+06	4.43626e+06	736584	296794
803	M243T85	1.56878	-7.88816	0.0529395	242.929	242.926	242.932	85.111	84.9144	85.2315	4	2	2	http://metlin.scripps.edu/metabo_list.php?mass_min=241.78&mass_max=242.08	7.69091e+06	7.46598e+06	5.16046e+06	4.50111e+06
804	M631T371	4.69764	-9.28485	0.0529913	631.155	631.155	631.155	370.973	370.845	371.011	4	2	2	http://metlin.scripps.edu/metabo_list.php?mass_min=630&mass_max=630.3	3.74598e+07	4.41698e+07	9.53457e+06	7.84217e+06
805	M697T850	2.93817	-4.15648	0.0533491	697.441	697.441	697.441	850.151	850.151	850.151	1	1	0	http://metlin.scripps.edu/metabo_list.php?mass_min=696.29&mass_max=696.59	2.20213e+06	2.75137e+06	1.12418e+06	561730
806	M371T180	1.58736	9.65312	0.0533827	371.137	371.136	371.138	180.062	179.364	180.76	2	0	2	http://metlin.scripps.edu/metabo_list.php?mass_min=369.99&mass_max=370.29	4.59048e+06	4.71503e+06	7.66179e+06	7.10944e+06
807	M240T682	2.49257	-4.42353	0.0534805	240.102	240.102	240.102	682.495	682.392	682.596	4	2	2	http://metlin.scripps.edu/metabo_list.php?mass_min=238.95&mass_max=239.25	7.57299e+07	9.39721e+07	4.10228e+07	2.70603e+07
808	M454T748	2.57565	-5.24692	0.0535802	454.333	454.333	454.335	748.406	747.849	748.845	4	2	2	http://metlin.scripps.edu/metabo_list.php?mass_min=453.18&mass_max=453.48	1.00407e+08	1.12909e+08	5.21605e+07	3.066e+07
809	M868T694	2.41613	-5.63994	0.0536329	867.608	867.608	867.608	694.276	694.211	694.442	4	2	2	http://metlin.scripps.edu/metabo_list.php?mass_min=866.46&mass_max=866.76	3.51448e+07	3.8733e+07	1.86822e+07	1.18947e+07
810	M288T338	9.16143	11.8372	0.0536539	288.179	288.179	288.179	337.752	337.618	337.886	2	0	2	http://metlin.scripps.edu/metabo_list.php?mass_min=287.03&mass_max=287.33	1.08269e+06	1.0818e+06	9.16874e+06	1.06611e+07
811	M667T659	2.73206	-10.5877	0.0536691	667.316	667.316	667.316	658.726	658.687	658.766	2	2	0	http://metlin.scripps.edu/metabo_list.php?mass_min=666.17&mass_max=666.47	2.30209e+06	2.59142e+06	918754	872387
812	M445T498	2.47608	6.97949	0.0537163	445.095	445.095	445.095	497.699	497.637	497.76	2	0	2	http://metlin.scripps.edu/metabo_list.php?mass_min=443.95&mass_max=444.25	431686	642596	1.28777e+06	1.37224e+06
813	M388T431	2.76764	-5.90733	0.0538381	388.253	388.246	388.265	430.91	430.592	431.248	4	2	2	http://metlin.scripps.edu/metabo_list.php?mass_min=387.1&mass_max=387.4	2.40477e+07	1.98016e+07	8.97616e+06	6.86741e+06
814	M650T721	2.48692	-4.81608	0.0538449	650.484	650.484	650.484	721.436	721.364	721.566	4	2	2	http://metlin.scripps.edu/metabo_list.php?mass_min=649.33&mass_max=649.63	3.77404e+06	4.32423e+06	2.04891e+06	1.20745e+06
815	M616T688	2.56054	-4.18271	0.053905	616.423	616.413	616.425	688.226	688.176	688.929	4	2	2	http://metlin.scripps.edu/metabo_list.php?mass_min=615.27&mass_max=615.57	5.35137e+06	6.49956e+06	2.95902e+06	1.66927e+06
816	M633T646	2.64286	-4.95377	0.0541016	633.46	633.459	633.46	645.822	645.63	646.005	4	2	2	http://metlin.scripps.edu/metabo_list.php?mass_min=632.31&mass_max=632.61	5.33779e+06	6.09779e+06	2.77209e+06	1.55489e+06
817	M565T390	1.85551	-4.63985	0.0541125	565.299	565.299	565.299	389.813	389.748	389.878	2	2	0	http://metlin.scripps.edu/metabo_list.php?mass_min=564.15&mass_max=564.45	3.02133e+06	3.383e+06	1.98758e+06	1.46394e+06
818	M200T371	2.93194	-10.1702	0.0541385	200.035	200.034	200.038	371	370.957	371.157	4	2	2	http://metlin.scripps.edu/metabo_list.php?mass_min=198.89&mass_max=199.19	2.63321e+06	2.99167e+06	992122	926362
819	M637T809	3.63384	-4.23515	0.0541395	637.393	637.392	637.393	808.712	808.565	809.002	4	2	2	http://metlin.scripps.edu/metabo_list.php?mass_min=636.24&mass_max=636.54	5.67666e+06	7.38768e+06	2.51722e+06	1.07797e+06
820	M824T699	2.49064	-5.5489	0.0541921	823.581	823.581	823.581	699.474	699.273	699.526	4	2	2	http://metlin.scripps.edu/metabo_list.php?mass_min=822.43&mass_max=822.73	8.67165e+07	9.60133e+07	4.53726e+07	2.79941e+07
821	M339T489	1.85796	-4.67357	0.0542094	339.117	339.116	339.118	489.287	488.498	490.198	4	2	2	http://metlin.scripps.edu/metabo_list.php?mass_min=337.97&mass_max=338.27	1.09832e+07	9.82567e+06	6.44954e+06	4.75031e+06
822	M285T409	5.95217	-7.73763	0.0542224	285.189	285.189	285.189	408.501	408.245	408.758	2	2	0	http://metlin.scripps.edu/metabo_list.php?mass_min=284.04&mass_max=284.34	3.82598e+06	4.693e+06	863396	567843
823	M444T313	2.17182	4.68733	0.054348	444.268	444.268	444.268	313.221	313.221	313.221	1	0	1	http://metlin.scripps.edu/metabo_list.php?mass_min=443.12&mass_max=443.42	429536	653903	1.25238e+06	1.10065e+06
824	M473T489	3.84599	-6.34101	0.0543831	473.16	473.146	473.175	489.284	488.631	489.745	4	2	2	http://metlin.scripps.edu/metabo_list.php?mass_min=472.01&mass_max=472.31	1.02499e+07	8.27773e+06	2.85179e+06	1.96561e+06
825	M1205T390	2.295	-5.59806	0.0544289	1204.5	1204.5	1204.5	389.834	389.834	389.834	1	0	1	http://metlin.scripps.edu/metabo_list.php?mass_min=1203.35&mass_max=1203.65	1.61802e+07	1.77757e+07	8.91183e+06	5.88377e+06
826	M867T694	2.44277	-6.05343	0.0544909	866.604	866.604	866.604	694.391	694.211	694.542	4	2	2	http://metlin.scripps.edu/metabo_list.php?mass_min=865.45&mass_max=865.75	7.7447e+07	8.42286e+07	4.02139e+07	2.59715e+07
827	M403T960	1.10322	-5.41225	0.0545072	403.233	403.233	403.233	959.641	959.641	959.641	1	1	0	http://metlin.scripps.edu/metabo_list.php?mass_min=402.08&mass_max=402.38	1.88522e+07	1.94322e+07	1.71917e+07	1.75106e+07
828	M368T657	2.29339	-6.64625	0.054589	368.186	368.169	368.2	656.991	656.177	657.811	4	2	2	http://metlin.scripps.edu/metabo_list.php?mass_min=367.04&mass_max=367.34	1.02068e+08	1.19388e+08	5.19257e+07	4.46373e+07
829	M713T85	1.46165	-4.93447	0.0546405	712.818	712.818	712.818	84.5807	84.5807	84.5807	1	1	0	http://metlin.scripps.edu/metabo_list.php?mass_min=711.67&mass_max=711.97	804644	752001	574794	490201
830	M823T700	2.49767	-5.49988	0.0546507	822.578	822.578	822.578	699.511	699.454	699.595	4	2	2	http://metlin.scripps.edu/metabo_list.php?mass_min=821.43&mass_max=821.73	1.97325e+08	2.18793e+08	1.03284e+08	6.33178e+07
831	M503T864	2.91217	-4.12901	0.0546672	503.306	503.306	503.306	863.524	863.397	863.653	3	2	1	http://metlin.scripps.edu/metabo_list.php?mass_min=502.16&mass_max=502.46	1.21987e+07	1.54407e+07	6.22949e+06	3.26153e+06
832	M609T862	2.63264	-4.55656	0.0546722	609.389	609.389	609.389	862.227	862.227	862.227	1	1	0	http://metlin.scripps.edu/metabo_list.php?mass_min=608.24&mass_max=608.54	4.52243e+06	5.29217e+06	2.40987e+06	1.31817e+06
833	M269T390	2.26328	-4.26469	0.0547958	269.128	269.128	269.128	390.42	390.375	390.462	3	1	2	http://metlin.scripps.edu/metabo_list.php?mass_min=267.98&mass_max=268.28	8.58224e+06	1.05274e+07	5.00775e+06	3.43561e+06
834	M370T180	2.64647	7.34566	0.0548143	370.14	370.14	370.14	179.8	179.003	180.824	4	2	2	http://metlin.scripps.edu/metabo_list.php?mass_min=368.99&mass_max=369.29	1.13461e+07	1.74007e+07	3.91408e+07	3.69365e+07
835	M565T862	2.3865	-4.12948	0.0548374	565.363	565.363	565.363	861.581	861.047	861.739	3	2	1	http://metlin.scripps.edu/metabo_list.php?mass_min=564.21&mass_max=564.51	3.47637e+06	4.20155e+06	2.00891e+06	1.20832e+06
836	M373T363	9.3674	8.9076	0.054842	373.129	373.129	373.129	363.426	363.425	363.428	2	0	2	http://metlin.scripps.edu/metabo_list.php?mass_min=371.98&mass_max=372.28	882873	546868	7.34663e+06	6.04631e+06
837	M795T476	4.98701	4.86762	0.0548718	795.397	795.361	795.405	476.164	468.896	481.107	4	2	2	http://metlin.scripps.edu/metabo_list.php?mass_min=794.25&mass_max=794.55	6.00942e+06	1.53679e+07	6.07039e+07	4.59048e+07
838	M203T493	41.1948	10.6017	0.054929	203.179	203.179	203.179	493.127	493.037	493.217	2	0	2	http://metlin.scripps.edu/metabo_list.php?mass_min=202.03&mass_max=202.33	85542.8	278594	8.18379e+06	6.81677e+06
839	M1098T371_1	7.61222	-11.0111	0.0549568	1097.87	1097.87	1097.87	370.643	370.643	370.643	1	0	1	http://metlin.scripps.edu/metabo_list.php?mass_min=1096.72&mass_max=1097.02	7.74254e+06	9.06097e+06	1.17249e+06	1.03495e+06
840	M611T800	4.55628	-8.88658	0.0549913	611.428	611.428	611.428	800.348	800.348	800.348	1	1	0	http://metlin.scripps.edu/metabo_list.php?mass_min=610.28&mass_max=610.58	1.45852e+06	1.72964e+06	384888	314840
841	M458T649	8.41738	-5.45521	0.0550602	458.331	458.331	458.331	648.804	648.791	648.817	2	2	0	http://metlin.scripps.edu/metabo_list.php?mass_min=457.18&mass_max=457.48	5.27019e+06	7.0171e+06	1.20097e+06	258779
842	M361T649	1.21856	-11.0172	0.0551636	361.223	361.22	361.229	649.416	649.105	649.756	3	2	1	http://metlin.scripps.edu/metabo_list.php?mass_min=360.07&mass_max=360.37	6.6897e+06	6.66817e+06	5.5892e+06	5.37281e+06
843	M393T682	2.47694	-4.28772	0.0552402	393.163	393.163	393.163	682.495	682.392	682.596	4	2	2	http://metlin.scripps.edu/metabo_list.php?mass_min=392.01&mass_max=392.31	3.96222e+07	4.93391e+07	2.17866e+07	1.41292e+07
844	M971T714	2.56236	-4.08979	0.0552532	971.385	971.385	971.385	713.891	713.891	713.891	1	1	0	http://metlin.scripps.edu/metabo_list.php?mass_min=970.23&mass_max=970.53	2.66142e+06	2.16806e+06	1.2046e+06	680179
845	M553T471	13.7987	-11.2194	0.0552588	553.262	553.261	553.262	471.145	470.997	471.188	4	2	2	http://metlin.scripps.edu/metabo_list.php?mass_min=552.11&mass_max=552.41	6.01829e+07	7.09991e+07	5.14932e+06	4.35754e+06
846	M819T408	16.1975	-9.59375	0.0552957	819.336	819.336	819.337	408.338	408.245	408.432	2	2	0	http://metlin.scripps.edu/metabo_list.php?mass_min=818.19&mass_max=818.49	9.70767e+06	8.01145e+06	724343	369600
847	M389T781	2.59251	-5.12534	0.0552977	389.277	389.276	389.277	781.372	781.265	781.452	4	2	2	http://metlin.scripps.edu/metabo_list.php?mass_min=388.13&mass_max=388.43	7.13564e+06	8.05348e+06	3.71547e+06	2.14338e+06
848	M264T853	1.86424	-4.07852	0.0553178	264.252	264.25	264.253	852.907	852.495	853.154	4	2	2	http://metlin.scripps.edu/metabo_list.php?mass_min=263.1&mass_max=263.4	2.04666e+06	2.41164e+06	1.37152e+06	1.01996e+06
849	M459T855	2.81459	-4.08238	0.0553491	459.294	459.294	459.294	855.03	855.03	855.03	1	1	0	http://metlin.scripps.edu/metabo_list.php?mass_min=458.14&mass_max=458.44	1.70681e+07	2.14852e+07	8.94401e+06	4.75368e+06
850	M632T371	4.93332	-10.6686	0.0554454	632.158	632.158	632.158	370.973	370.845	371.011	4	2	2	http://metlin.scripps.edu/metabo_list.php?mass_min=631.01&mass_max=631.31	1.35103e+07	1.56738e+07	3.09581e+06	2.8199e+06
851	M402T842	2.72876	-4.46941	0.0555439	402.29	402.29	402.29	841.691	841.528	841.908	4	2	2	http://metlin.scripps.edu/metabo_list.php?mass_min=401.14&mass_max=401.44	2.52922e+07	2.98505e+07	1.32788e+07	6.92914e+06
852	M538T457	1.78927	4.97531	0.0556374	538.226	538.225	538.227	456.901	456.859	456.943	2	0	2	http://metlin.scripps.edu/metabo_list.php?mass_min=537.08&mass_max=537.38	714198	938511	1.41071e+06	1.54644e+06
853	M268T284	3.19872	7.26862	0.0556666	267.966	267.966	267.966	283.891	283.882	283.9	2	0	2	http://metlin.scripps.edu/metabo_list.php?mass_min=266.82&mass_max=267.12	451215	555090	1.75251e+06	1.46638e+06
854	M588T765	2.34634	-4.57482	0.0557174	588.352	588.351	588.353	765.067	764.778	765.588	4	2	2	http://metlin.scripps.edu/metabo_list.php?mass_min=587.2&mass_max=587.5	1.39552e+08	1.71737e+08	7.7387e+07	5.52831e+07
855	M589T766	2.56095	-4.79457	0.0557551	589.356	589.356	589.356	765.71	765.588	765.758	4	2	2	http://metlin.scripps.edu/metabo_list.php?mass_min=588.21&mass_max=588.51	4.96522e+07	6.1577e+07	2.5516e+07	1.79168e+07
856	M345T790	1.1574	-4.49932	0.0557892	345.311	345.308	345.314	790.189	790.053	790.326	2	0	2	http://metlin.scripps.edu/metabo_list.php?mass_min=344.16&mass_max=344.46	1.50184e+06	1.55513e+06	1.35837e+06	1.28289e+06
857	M912T689	2.75045	-6.96468	0.0558153	911.634	911.634	911.634	689.218	689.145	689.251	4	2	2	http://metlin.scripps.edu/metabo_list.php?mass_min=910.48&mass_max=910.78	1.47444e+07	1.5746e+07	6.84276e+06	4.24283e+06
858	M558T392	12.4081	11.3664	0.0558589	558.136	558.135	558.137	392.494	392.319	392.668	2	0	2	http://metlin.scripps.edu/metabo_list.php?mass_min=556.99&mass_max=557.29	339157	342584	4.57167e+06	3.88744e+06
859	M524T348	20.9358	11.2944	0.055869	524.228	524.228	524.228	347.735	347.655	347.815	2	0	2	http://metlin.scripps.edu/metabo_list.php?mass_min=523.08&mass_max=523.38	568592	648867	1.3818e+07	1.16705e+07
860	M613T371	4.68056	-10.6375	0.0559233	613.144	613.143	613.145	370.771	370.643	370.988	4	2	2	http://metlin.scripps.edu/metabo_list.php?mass_min=611.99&mass_max=612.29	4.24039e+06	4.91194e+06	1.01877e+06	936620
861	M506T829	3.15736	-4.16087	0.0559307	506.324	506.323	506.325	828.796	828.784	828.809	2	2	0	http://metlin.scripps.edu/metabo_list.php?mass_min=505.17&mass_max=505.47	1.67549e+06	2.15743e+06	809405	404556
862	M704T497	49.3113	10.5252	0.0559498	704.399	704.399	704.399	497.384	497.322	497.445	2	0	2	http://metlin.scripps.edu/metabo_list.php?mass_min=703.25&mass_max=703.55	182724	731070	2.46093e+07	2.0451e+07
863	M407T617	3.07694	-6.25078	0.0559984	407.193	407.192	407.194	617.266	617.053	617.478	2	2	0	http://metlin.scripps.edu/metabo_list.php?mass_min=406.04&mass_max=406.34	7.31459e+06	8.91585e+06	2.99375e+06	2.28112e+06
864	M305T121	1.85187	-4.05141	0.0560261	305.185	305.185	305.185	120.848	120.848	120.848	1	1	0	http://metlin.scripps.edu/metabo_list.php?mass_min=304.03&mass_max=304.33	6.97211e+06	5.95578e+06	2.96095e+06	4.02005e+06
865	M357T262	2.21931	5.72955	0.0560409	357.163	357.162	357.163	261.617	261.352	262.079	4	2	2	http://metlin.scripps.edu/metabo_list.php?mass_min=356.01&mass_max=356.31	2.18535e+07	3.2138e+07	6.24734e+07	5.73501e+07
866	M608T862	2.62398	-4.06433	0.056075	608.385	608.385	608.385	862.375	862.292	862.551	4	2	2	http://metlin.scripps.edu/metabo_list.php?mass_min=607.24&mass_max=607.54	1.54387e+07	1.93202e+07	8.42253e+06	4.82405e+06
867	M224T534	5.42493	-10.8481	0.0561011	224.128	224.127	224.129	534.272	534.156	534.387	2	2	0	http://metlin.scripps.edu/metabo_list.php?mass_min=222.98&mass_max=223.28	5.12136e+06	4.40825e+06	913315	843319
868	M777T781	2.72575	-5.1006	0.056195	776.544	776.544	776.544	780.666	780.477	780.738	4	2	2	http://metlin.scripps.edu/metabo_list.php?mass_min=775.39&mass_max=775.69	1.61217e+07	1.82612e+07	8.15348e+06	4.46061e+06
869	M312T172	3.29598	-7.79161	0.0563044	312.202	312.199	312.204	172.29	172.23	172.349	2	2	0	http://metlin.scripps.edu/metabo_list.php?mass_min=311.05&mass_max=311.35	9.84601e+06	1.16788e+07	3.55868e+06	2.97194e+06
870	M410T682	2.48373	-4.30492	0.0563529	410.171	410.17	410.171	682.183	682.078	682.284	4	2	2	http://metlin.scripps.edu/metabo_list.php?mass_min=409.02&mass_max=409.32	5.62053e+08	7.01614e+08	3.07474e+08	2.01303e+08
871	M740T709	2.60479	-6.13553	0.056374	740.481	740.48	740.481	709.215	708.502	709.565	4	2	2	http://metlin.scripps.edu/metabo_list.php?mass_min=739.33&mass_max=739.63	9.57574e+06	1.04038e+07	4.74884e+06	2.92148e+06
872	M733T787	2.70016	-4.52512	0.0564044	732.518	732.518	732.519	787.373	787.349	787.487	4	2	2	http://metlin.scripps.edu/metabo_list.php?mass_min=731.37&mass_max=731.67	2.45044e+07	2.8714e+07	1.29007e+07	6.80856e+06
873	M286T876	1.03678	-5.55286	0.0564633	286.251	286.251	286.252	876.435	876.175	876.543	4	2	2	http://metlin.scripps.edu/metabo_list.php?mass_min=285.1&mass_max=285.4	2.7516e+06	2.72053e+06	2.64702e+06	2.63101e+06
874	M821T496	6.24403	-9.64488	0.0564658	821.359	821.348	821.37	496.21	489.15	503.41	4	2	2	http://metlin.scripps.edu/metabo_list.php?mass_min=820.21&mass_max=820.51	1.52206e+07	1.28228e+07	2.47665e+06	2.01459e+06
875	M318T862	2.9704	-4.07774	0.056499	318.196	318.196	318.197	862.227	862.068	862.349	3	2	1	http://metlin.scripps.edu/metabo_list.php?mass_min=317.05&mass_max=317.35	5.67775e+06	7.2499e+06	2.87447e+06	1.4777e+06
876	M291T206	1.86856	4.83689	0.0566031	291.157	291.157	291.157	205.546	205.546	205.546	1	0	1	http://metlin.scripps.edu/metabo_list.php?mass_min=290.01&mass_max=290.31	7.67337e+06	1.04369e+07	1.77772e+07	1.60629e+07
877	M261T351	3.24552	-8.52559	0.0566454	261.091	261.089	261.091	350.912	349.961	352.046	3	2	1	http://metlin.scripps.edu/metabo_list.php?mass_min=259.94&mass_max=260.24	5.93219e+06	6.94157e+06	2.11809e+06	1.84853e+06
878	M252T682	2.64414	-4.77466	0.0567091	252.089	252.089	252.089	682.239	682.078	682.484	4	2	2	http://metlin.scripps.edu/metabo_list.php?mass_min=250.94&mass_max=251.24	4.31753e+06	5.38616e+06	2.17221e+06	1.49768e+06
879	M666T659	2.82164	-10.3152	0.0567537	666.321	666.319	666.324	658.501	658.447	658.687	4	2	2	http://metlin.scripps.edu/metabo_list.php?mass_min=665.17&mass_max=665.47	9.34612e+06	1.05817e+07	3.61621e+06	3.44629e+06
880	M449T848	2.82984	-4.5884	0.0567766	448.825	448.825	448.825	847.853	847.753	847.938	4	2	2	http://metlin.scripps.edu/metabo_list.php?mass_min=447.67&mass_max=447.97	1.56802e+07	1.83517e+07	8.00457e+06	4.02153e+06
881	M248T715	1.36479	-4.68662	0.0568086	248.138	248.126	248.146	714.558	714.336	739.381	4	2	2	http://metlin.scripps.edu/metabo_list.php?mass_min=246.99&mass_max=247.29	8.3946e+06	9.23847e+06	6.73349e+06	6.18649e+06
882	M784T705	3.0421	-7.14729	0.0569818	783.507	783.507	783.507	704.694	704.53	704.759	4	2	2	http://metlin.scripps.edu/metabo_list.php?mass_min=782.36&mass_max=782.66	8.37631e+06	8.92946e+06	3.60856e+06	2.0802e+06
883	M550T822	3.36854	-4.75576	0.0569984	550.343	550.343	550.344	822.122	822.099	822.145	2	2	0	http://metlin.scripps.edu/metabo_list.php?mass_min=549.19&mass_max=549.49	1.9952e+06	2.3374e+06	913849	372343
884	M485T756	2.52223	-6.63733	0.0570074	484.84	484.839	484.84	755.779	755.697	755.813	4	2	2	http://metlin.scripps.edu/metabo_list.php?mass_min=483.69&mass_max=483.99	8.35178e+07	8.93923e+07	4.15691e+07	2.69853e+07
885	M408T568	3.42675	-9.1949	0.0570466	408.136	408.136	408.136	568.303	568.303	568.303	1	1	0	http://metlin.scripps.edu/metabo_list.php?mass_min=406.99&mass_max=407.29	9.08344e+06	8.79042e+06	3.28052e+06	1.93545e+06
886	M395T863	2.8654	-4.02374	0.0570907	395.282	395.282	395.282	862.551	862.068	862.674	3	2	1	http://metlin.scripps.edu/metabo_list.php?mass_min=394.13&mass_max=394.43	2.29977e+07	2.91848e+07	1.19779e+07	6.23336e+06
887	M411T322	2.77689	-6.00645	0.0571327	411.175	411.174	411.175	321.695	321.392	322.155	3	2	1	http://metlin.scripps.edu/metabo_list.php?mass_min=410.02&mass_max=410.32	1.05326e+08	8.67377e+07	3.88582e+07	3.03069e+07
888	M415T863	2.86867	-3.99898	0.0572205	414.786	414.786	414.786	862.589	862.4	862.674	4	2	2	http://metlin.scripps.edu/metabo_list.php?mass_min=413.64&mass_max=413.94	1.72682e+07	2.17504e+07	9.05397e+06	4.54766e+06
889	M795T781	2.8137	-4.85842	0.0572341	794.573	794.573	794.574	780.721	780.629	780.802	4	2	2	http://metlin.scripps.edu/metabo_list.php?mass_min=793.42&mass_max=793.72	7.03197e+07	8.07595e+07	3.54028e+07	1.82915e+07
890	M419T574	2.99203	-5.07571	0.0572446	419.277	419.262	419.292	574.232	572.492	575.973	2	2	0	http://metlin.scripps.edu/metabo_list.php?mass_min=418.13&mass_max=418.43	1.67848e+07	2.10946e+07	7.56629e+06	5.09382e+06
891	M491T679	2.27855	-6.41854	0.057321	491.328	491.326	491.33	678.776	678.561	679.038	4	2	2	http://metlin.scripps.edu/metabo_list.php?mass_min=490.18&mass_max=490.48	8.93951e+06	9.56528e+06	4.80656e+06	3.31476e+06
892	M593T816	3.30701	-4.30773	0.057347	593.365	593.365	593.365	815.706	815.599	815.779	4	2	2	http://metlin.scripps.edu/metabo_list.php?mass_min=592.22&mass_max=592.52	6.6017e+06	8.01419e+06	3.15949e+06	1.26018e+06
893	M681T801	3.34921	-4.09088	0.0573702	681.419	681.418	681.419	801.395	801.3	801.434	4	2	2	http://metlin.scripps.edu/metabo_list.php?mass_min=680.27&mass_max=680.57	4.53087e+06	5.89419e+06	2.13437e+06	978326
894	M552T263	3.06623	-4.8224	0.0573822	552.101	552.101	552.101	263.035	263.035	263.035	1	1	0	http://metlin.scripps.edu/metabo_list.php?mass_min=550.95&mass_max=551.25	973776	766641	347525	220083
895	M358T512	49.7253	10.8518	0.0573888	358.138	358.138	358.138	511.523	511.488	511.557	2	0	2	http://metlin.scripps.edu/metabo_list.php?mass_min=356.99&mass_max=357.29	332401	180520	1.39016e+07	1.16035e+07
896	M500T280	41.8924	11.0034	0.0575274	500.228	500.227	500.228	279.761	279.731	279.791	2	0	2	http://metlin.scripps.edu/metabo_list.php?mass_min=499.08&mass_max=499.38	698223	846794	3.52322e+07	2.94923e+07
897	M415T744	3.57358	-7.89247	0.0576294	415.211	415.21	415.211	743.768	743.756	743.779	2	2	0	http://metlin.scripps.edu/metabo_list.php?mass_min=414.06&mass_max=414.36	1.99535e+07	2.37729e+07	6.69498e+06	5.54101e+06
898	M754T788	2.8031	-4.31941	0.0576374	754.499	754.499	754.499	787.577	787.487	787.666	2	2	0	http://metlin.scripps.edu/metabo_list.php?mass_min=753.35&mass_max=753.65	8.97864e+06	1.0716e+07	4.69451e+06	2.33152e+06
899	M507T750	2.67416	-7.76671	0.0576588	506.853	506.853	506.854	749.788	749.586	749.795	4	2	2	http://metlin.scripps.edu/metabo_list.php?mass_min=505.7&mass_max=506	4.2819e+07	4.49182e+07	1.97814e+07	1.30279e+07
900	M564T861	2.40172	-3.98043	0.0577212	564.359	564.359	564.359	861.39	861.285	861.581	4	2	2	http://metlin.scripps.edu/metabo_list.php?mass_min=563.21&mass_max=563.51	1.35362e+07	1.66892e+07	7.84966e+06	4.73521e+06
901	M1044T685	2.82537	-4.11996	0.0577414	1044.46	1044.46	1044.46	685.363	684.361	686.366	2	2	0	http://metlin.scripps.edu/metabo_list.php?mass_min=1043.31&mass_max=1043.61	3.96122e+06	5.05458e+06	2.04366e+06	1.14735e+06
902	M794T781	2.7964	-4.79282	0.0577474	793.571	793.571	793.571	780.77	780.704	780.946	4	2	2	http://metlin.scripps.edu/metabo_list.php?mass_min=792.42&mass_max=792.72	2.54421e+08	2.92954e+08	1.29088e+08	6.66549e+07
903	M273T192	3.93674	7.92718	0.05788	273.16	273.16	273.161	192.269	191.409	193.651	3	1	2	http://metlin.scripps.edu/metabo_list.php?mass_min=272.01&mass_max=272.31	4.76386e+06	3.85329e+06	1.84916e+07	1.54319e+07
904	M401T842	2.70658	-4.40894	0.0579141	401.287	401.287	401.287	841.706	841.511	841.908	4	2	2	http://metlin.scripps.edu/metabo_list.php?mass_min=400.14&mass_max=400.44	1.1581e+08	1.36579e+08	6.13855e+07	3.1865e+07
905	M579T615	2.61043	-7.5501	0.0579903	579.355	579.355	579.355	614.685	613.638	614.718	3	2	1	http://metlin.scripps.edu/metabo_list.php?mass_min=578.21&mass_max=578.51	2.69458e+06	3.14883e+06	1.19279e+06	1.0457e+06
906	M338T391	2.14321	-4.10037	0.0579937	338.113	338.113	338.113	390.798	390.736	391.003	4	2	2	http://metlin.scripps.edu/metabo_list.php?mass_min=336.96&mass_max=337.26	6.46707e+07	7.9094e+07	3.94923e+07	2.7587e+07
907	M335T527	1.81772	-7.49992	0.0579942	335.117	335.116	335.144	527.075	526.834	527.567	4	2	2	http://metlin.scripps.edu/metabo_list.php?mass_min=333.97&mass_max=334.27	2.25012e+07	2.16765e+07	1.34111e+07	1.08928e+07
908	M353T683	2.49492	-4.28538	0.0580044	353.132	353.132	353.132	682.551	682.484	682.707	4	2	2	http://metlin.scripps.edu/metabo_list.php?mass_min=351.98&mass_max=352.28	1.79078e+08	2.24393e+08	9.76595e+07	6.40575e+07
909	M349T371	2.70565	-8.71106	0.0580293	349.112	349.112	349.114	371.084	370.676	371.27	4	2	2	http://metlin.scripps.edu/metabo_list.php?mass_min=347.96&mass_max=348.26	1.32244e+08	1.52257e+08	5.49937e+07	5.01572e+07
910	M555T671	2.67956	-9.09842	0.0581624	554.862	554.862	554.862	670.839	670.839	670.839	1	1	0	http://metlin.scripps.edu/metabo_list.php?mass_min=553.71&mass_max=554.01	1.11236e+06	1.14477e+06	497217	345136
911	M221T536	1.74179	5.09782	0.0581657	221.179	221.179	221.179	535.964	535.964	535.964	1	0	1	http://metlin.scripps.edu/metabo_list.php?mass_min=220.03&mass_max=220.33	6.34171e+06	7.31554e+06	1.27602e+07	1.10279e+07
912	M545T694	2.207	-3.99239	0.0582361	545.324	545.323	545.326	694.391	694.34	694.442	2	2	0	http://metlin.scripps.edu/metabo_list.php?mass_min=544.17&mass_max=544.47	1.74615e+06	2.10074e+06	1.06642e+06	676609
913	M516T316	1.66713	-6.46334	0.0582406	516.115	516.114	516.117	316.46	316.21	317.198	4	2	2	http://metlin.scripps.edu/metabo_list.php?mass_min=514.96&mass_max=515.26	8.44921e+06	9.47664e+06	5.16641e+06	5.58611e+06
914	M822T489	2.43675	-4.52085	0.058246	822.352	822.352	822.352	489.292	488.838	489.745	2	2	0	http://metlin.scripps.edu/metabo_list.php?mass_min=821.2&mass_max=821.5	7.2714e+06	5.8497e+06	3.16858e+06	2.21609e+06
915	M732T787	2.66999	-4.39678	0.0582534	731.515	731.515	731.515	787.431	787.372	787.666	4	2	2	http://metlin.scripps.edu/metabo_list.php?mass_min=730.37&mass_max=730.67	6.13714e+07	7.23041e+07	3.28125e+07	1.72533e+07
916	M324T319	4.97582	6.13093	0.0582544	324.184	324.184	324.184	318.913	318.829	320.758	3	1	2	http://metlin.scripps.edu/metabo_list.php?mass_min=323.03&mass_max=323.33	3.57797e+06	1.40373e+07	4.61216e+07	4.15288e+07
917	M695T716_2	2.57684	-4.80331	0.0582835	695.454	695.454	695.454	715.688	715.54	715.836	4	2	2	http://metlin.scripps.edu/metabo_list.php?mass_min=694.3&mass_max=694.6	4.35904e+07	4.97852e+07	2.3196e+07	1.30405e+07
918	M352T683	2.49281	-4.30291	0.0583298	352.129	352.129	352.129	682.551	682.484	682.707	4	2	2	http://metlin.scripps.edu/metabo_list.php?mass_min=350.98&mass_max=351.28	8.68352e+08	1.08821e+09	4.72765e+08	3.12117e+08
919	M230T374	2.21088	-4.5634	0.0583396	230.113	230.112	230.115	373.988	373.659	374.423	4	2	2	http://metlin.scripps.edu/metabo_list.php?mass_min=228.96&mass_max=229.26	5.99425e+07	5.2517e+07	3.10687e+07	1.97977e+07
920	M549T822	3.19642	-4.79989	0.0583964	549.343	549.341	549.344	822.145	822.099	822.195	3	2	1	http://metlin.scripps.edu/metabo_list.php?mass_min=548.19&mass_max=548.49	7.85034e+06	9.11438e+06	3.6906e+06	1.61681e+06
921	M460T715	1.68689	-4.51187	0.058399	460.24	460.24	460.24	714.858	714.598	714.967	4	2	2	http://metlin.scripps.edu/metabo_list.php?mass_min=459.09&mass_max=459.39	8.06172e+08	9.36832e+08	5.6043e+08	4.72835e+08
922	M285T683	2.47021	-4.22758	0.0584078	285.124	285.124	285.124	682.54	682.484	682.596	2	2	0	http://metlin.scripps.edu/metabo_list.php?mass_min=283.97&mass_max=284.27	1.85581e+07	2.32521e+07	1.02387e+07	6.68713e+06
923	M313T682	2.54307	-4.24526	0.0586096	313.118	313.118	313.118	682.183	682.078	682.284	4	2	2	http://metlin.scripps.edu/metabo_list.php?mass_min=311.97&mass_max=312.27	5.21404e+07	6.56276e+07	2.81903e+07	1.8119e+07
924	M446T836	2.69922	-4.40291	0.0586507	446.316	446.314	446.316	835.768	835.626	835.784	4	2	2	http://metlin.scripps.edu/metabo_list.php?mass_min=445.17&mass_max=445.47	1.97758e+07	2.32931e+07	1.05054e+07	5.45075e+06
925	M795T682_2	3.74968	-4.94245	0.0586919	795.316	795.316	795.316	682.172	682.172	682.172	1	1	0	http://metlin.scripps.edu/metabo_list.php?mass_min=794.17&mass_max=794.47	2.80596e+06	3.25853e+06	1.19751e+06	419821
926	M778T781	2.78697	-4.6171	0.058753	777.547	777.547	777.547	780.666	780.477	780.738	4	2	2	http://metlin.scripps.edu/metabo_list.php?mass_min=776.4&mass_max=776.7	4.29396e+06	4.99083e+06	2.20818e+06	1.12332e+06
927	M265T713	1.48377	-4.64976	0.0588796	265.18	265.18	265.18	712.698	712.355	713.031	4	2	2	http://metlin.scripps.edu/metabo_list.php?mass_min=264.03&mass_max=264.33	7.4751e+07	8.41614e+07	5.65339e+07	5.05665e+07
928	M831T371	2.17488	-3.95078	0.0589226	831.304	831.299	831.317	371.397	371.3	372.841	4	2	2	http://metlin.scripps.edu/metabo_list.php?mass_min=830.15&mass_max=830.45	8.11894e+06	9.92e+06	4.98973e+06	3.3045e+06
929	M319T86	1.35835	-5.76403	0.0589569	318.968	318.961	318.971	85.9158	84.4325	86.8319	3	2	1	http://metlin.scripps.edu/metabo_list.php?mass_min=317.82&mass_max=318.12	827406	860341	656184	586310
930	M388T199	2.88305	8.37911	0.0590367	388.15	388.15	388.15	199.445	199.408	199.483	4	2	2	http://metlin.scripps.edu/metabo_list.php?mass_min=387&mass_max=387.3	7.79839e+06	1.21394e+07	2.92957e+07	2.81858e+07
931	M367T491	5.20089	-8.9542	0.0590946	367.163	367.143	367.185	491.237	488.838	493.534	4	2	2	http://metlin.scripps.edu/metabo_list.php?mass_min=366.01&mass_max=366.31	3.83774e+07	3.21557e+07	7.44651e+06	6.11524e+06
932	M410T190	3.29447	10.6952	0.059172	410.132	410.132	410.132	189.765	189.4	190.129	2	0	2	http://metlin.scripps.edu/metabo_list.php?mass_min=408.98&mass_max=409.28	1.32149e+06	2.04304e+06	5.55166e+06	5.53266e+06
933	M667T721	3.1021	-4.52922	0.0592164	667.402	667.401	667.402	720.581	720.546	720.616	2	2	0	http://metlin.scripps.edu/metabo_list.php?mass_min=666.25&mass_max=666.55	3.72454e+06	4.39134e+06	1.81552e+06	800734
934	M369T657	1.89244	-5.67269	0.0592933	369.181	369.163	369.197	656.832	656.177	657.493	4	2	2	http://metlin.scripps.edu/metabo_list.php?mass_min=368.03&mass_max=368.33	1.68478e+07	1.95791e+07	1.02783e+07	8.9704e+06
935	M763T808	1.88975	-4.09167	0.0593704	762.522	762.521	762.522	807.617	807.415	807.819	2	2	0	http://metlin.scripps.edu/metabo_list.php?mass_min=761.37&mass_max=761.67	9.20728e+06	1.06334e+07	6.14097e+06	4.35811e+06
936	M424T364	3.239	-5.46808	0.0593778	424.149	424.149	424.149	363.786	363.786	363.786	1	1	0	http://metlin.scripps.edu/metabo_list.php?mass_min=423&mass_max=423.3	1.47739e+06	1.85372e+06	608706	419732
937	M389T389	14.5536	-9.6746	0.0594358	389.272	389.272	389.272	389.028	388.806	389.251	2	2	0	http://metlin.scripps.edu/metabo_list.php?mass_min=388.12&mass_max=388.42	4.23234e+06	3.49699e+06	322220	208875
938	M793T781	2.80233	-4.91057	0.0594878	792.568	792.568	792.568	780.77	780.704	780.946	4	2	2	http://metlin.scripps.edu/metabo_list.php?mass_min=791.42&mass_max=791.72	5.96805e+08	6.80762e+08	3.00317e+08	1.55577e+08
939	M424T699	2.26567	-4.90699	0.0595763	423.786	423.786	423.787	699.384	699.127	699.526	4	2	2	http://metlin.scripps.edu/metabo_list.php?mass_min=422.64&mass_max=422.94	3.61377e+06	4.0515e+06	2.06907e+06	1.31416e+06
940	M379T85	1.63813	-9.52282	0.0597461	378.898	378.898	378.9	84.8962	84.7641	85.248	3	1	2	http://metlin.scripps.edu/metabo_list.php?mass_min=377.75&mass_max=378.05	3.18162e+06	3.14006e+06	2.05715e+06	1.80192e+06
941	M467T354	16.616	10.3348	0.0597654	467.223	467.223	467.223	353.786	353.737	353.836	2	0	2	http://metlin.scripps.edu/metabo_list.php?mass_min=466.07&mass_max=466.37	492855	626970	1.01469e+07	8.46015e+06
942	M413T863	2.73778	-3.90272	0.0599088	413.311	413.308	413.311	862.589	862.4	862.674	4	2	2	http://metlin.scripps.edu/metabo_list.php?mass_min=412.16&mass_max=412.46	5.0117e+07	6.33598e+07	2.71517e+07	1.42968e+07
943	M370T682	2.18439	-4.01568	0.0599456	370.14	370.139	370.14	682.239	682.172	682.707	4	2	2	http://metlin.scripps.edu/metabo_list.php?mass_min=368.99&mass_max=369.29	9.38896e+06	1.15646e+07	5.70048e+06	3.89193e+06
944	M379T682	2.16471	-6.28754	0.0599555	379.141	379.137	379.145	682.228	682.172	682.284	2	2	0	http://metlin.scripps.edu/metabo_list.php?mass_min=377.99&mass_max=378.29	3.40953e+06	3.63906e+06	1.90697e+06	1.34918e+06
945	M412T863	2.81341	-3.89846	0.0600385	412.309	412.309	412.309	862.589	862.4	862.674	4	2	2	http://metlin.scripps.edu/metabo_list.php?mass_min=411.16&mass_max=411.46	4.03511e+08	5.12243e+08	2.1543e+08	1.10065e+08
946	M258T490	1.71625	-4.26507	0.0600553	257.592	257.591	257.592	489.745	488.944	490.085	3	2	1	http://metlin.scripps.edu/metabo_list.php?mass_min=256.44&mass_max=256.74	4.58134e+06	4.08625e+06	2.86947e+06	2.18085e+06
947	M354T542	1.83685	-3.96852	0.0601305	354.205	354.192	354.208	541.908	540.854	543.02	4	2	2	http://metlin.scripps.edu/metabo_list.php?mass_min=353.05&mass_max=353.35	2.33129e+07	2.77556e+07	1.58138e+07	1.19885e+07
948	M548T780	2.62843	-5.34261	0.0601514	548.336	548.336	548.336	779.782	779.506	779.992	3	2	1	http://metlin.scripps.edu/metabo_list.php?mass_min=547.19&mass_max=547.49	7.93287e+06	8.81777e+06	4.05102e+06	2.32184e+06
949	M350T524	3.35394	5.72396	0.0601593	350.186	350.184	350.186	523.532	523.296	524.339	4	2	2	http://metlin.scripps.edu/metabo_list.php?mass_min=349.04&mass_max=349.34	3.34119e+08	4.74752e+08	1.50718e+09	1.20573e+09
950	M364T682	2.44777	-4.21795	0.0601684	364.166	364.165	364.166	682.495	682.392	682.596	4	2	2	http://metlin.scripps.edu/metabo_list.php?mass_min=363.02&mass_max=363.32	5.55919e+07	6.9768e+07	3.08043e+07	2.04096e+07
951	M349T700	2.41633	-5.5035	0.0601899	348.722	348.722	348.722	699.511	699.454	699.595	4	2	2	http://metlin.scripps.edu/metabo_list.php?mass_min=347.57&mass_max=347.87	6.35298e+06	6.97933e+06	3.39596e+06	2.12162e+06
952	M689T794	2.71247	-4.36413	0.0602014	689.495	689.495	689.495	794.242	794.076	794.39	4	2	2	http://metlin.scripps.edu/metabo_list.php?mass_min=688.35&mass_max=688.65	9.07347e+06	1.06936e+07	4.82191e+06	2.46558e+06
953	M382T683	2.48087	-4.16515	0.060219	382.176	382.176	382.176	682.54	682.484	682.596	2	2	0	http://metlin.scripps.edu/metabo_list.php?mass_min=381.03&mass_max=381.33	1.27401e+08	1.60361e+08	7.03895e+07	4.56031e+07
954	M357T511	29.9533	10.4067	0.0602609	357.135	357.135	357.135	511.185	511.149	511.221	2	0	2	http://metlin.scripps.edu/metabo_list.php?mass_min=355.98&mass_max=356.28	2.17749e+06	1.62111e+06	6.21672e+07	5.16135e+07
955	M336T658	4.35001	-8.29619	0.0602907	336.188	336.188	336.189	658.454	658.37	658.541	4	2	2	http://metlin.scripps.edu/metabo_list.php?mass_min=335.04&mass_max=335.34	3.11626e+07	3.73303e+07	8.64478e+06	7.1007e+06
956	M665T801	2.66554	-4.10454	0.0604118	665.443	665.438	665.443	801.336	801.117	801.418	4	2	2	http://metlin.scripps.edu/metabo_list.php?mass_min=664.29&mass_max=664.59	4.4275e+07	5.33748e+07	2.41945e+07	1.24397e+07
957	M255T682	2.27076	-4.32125	0.0604348	255.084	255.08	255.091	682.495	682.392	682.596	4	2	2	http://metlin.scripps.edu/metabo_list.php?mass_min=253.93&mass_max=254.23	1.85638e+07	2.29776e+07	1.06849e+07	7.60912e+06
958	M525T348	19.5164	10.4763	0.0604363	525.231	525.231	525.231	347.899	347.815	347.984	2	0	2	http://metlin.scripps.edu/metabo_list.php?mass_min=524.08&mass_max=524.38	220159	202413	4.49687e+06	3.7502e+06
959	M806T700	2.47687	-5.57868	0.0606223	805.552	805.552	805.552	699.672	699.454	699.918	4	2	2	http://metlin.scripps.edu/metabo_list.php?mass_min=804.4&mass_max=804.7	1.96285e+07	2.153e+07	1.0292e+07	6.3251e+06
960	M600T808	2.70531	-4.28912	0.060629	600.432	600.429	600.435	808.024	807.819	808.243	4	2	2	http://metlin.scripps.edu/metabo_list.php?mass_min=599.28&mass_max=599.58	5.33612e+07	6.32237e+07	2.85529e+07	1.45419e+07
961	M243T371	2.53979	-6.51255	0.0606564	243.066	243.065	243.067	371.313	371.27	371.469	4	2	2	http://metlin.scripps.edu/metabo_list.php?mass_min=241.92&mass_max=242.22	7.08107e+06	8.42797e+06	3.31317e+06	2.79325e+06
962	M335T658	4.35203	-8.34308	0.0606781	335.185	335.185	335.185	658.454	658.37	658.541	4	2	2	http://metlin.scripps.edu/metabo_list.php?mass_min=334.04&mass_max=334.34	1.46853e+08	1.75795e+08	4.05907e+07	3.35468e+07
963	M806T390	3.76479	-4.20349	0.0607864	806.317	806.316	806.317	389.813	389.748	389.878	2	2	0	http://metlin.scripps.edu/metabo_list.php?mass_min=805.17&mass_max=805.47	3.19183e+06	4.24091e+06	1.36978e+06	604493
964	M880T371	2.99464	-8.69344	0.0608266	880.349	880.349	880.349	371	370.957	371.157	4	2	2	http://metlin.scripps.edu/metabo_list.php?mass_min=879.2&mass_max=879.5	1.40905e+09	1.6372e+09	5.33239e+08	4.83997e+08
965	M258T738	12.0791	10.0106	0.0608464	258.184	258.184	258.185	737.953	737.752	738.154	2	0	2	http://metlin.scripps.edu/metabo_list.php?mass_min=257.03&mass_max=257.33	428042	532070	6.3274e+06	5.26991e+06
966	M414T524	3.20237	-4.50131	0.0608651	414.283	414.279	414.285	524.013	522.656	524.042	3	2	1	http://metlin.scripps.edu/metabo_list.php?mass_min=413.13&mass_max=413.43	4.60197e+07	5.43389e+07	2.21095e+07	9.22932e+06
967	M325T123	2.82227	-4.88125	0.0608755	325.163	325.163	325.163	122.988	122.988	122.988	1	1	0	http://metlin.scripps.edu/metabo_list.php?mass_min=324.01&mass_max=324.31	6.43282e+06	5.10806e+06	2.42392e+06	1.6653e+06
968	M405T354	15.8047	9.27272	0.0608818	405.146	405.146	405.146	354.117	354.071	354.164	2	0	2	http://metlin.scripps.edu/metabo_list.php?mass_min=404&mass_max=404.3	67679.9	116976	1.60455e+06	1.31388e+06
969	M353T794	2.73039	-4.39905	0.0609335	352.761	352.761	352.761	794.393	794.241	794.568	4	2	2	http://metlin.scripps.edu/metabo_list.php?mass_min=351.61&mass_max=351.91	1.41237e+07	1.65857e+07	7.46153e+06	3.78573e+06
970	M438T855	2.6946	-3.86848	0.060981	437.801	437.8	437.802	855.143	855.03	855.366	4	2	2	http://metlin.scripps.edu/metabo_list.php?mass_min=436.65&mass_max=436.95	2.25129e+06	2.85054e+06	1.23338e+06	659978
971	M467T694	2.25148	-4.07473	0.0610595	467.282	467.281	467.282	694.49	694.34	694.542	4	2	2	http://metlin.scripps.edu/metabo_list.php?mass_min=466.13&mass_max=466.43	7.54003e+07	9.36125e+07	4.46026e+07	3.04647e+07
972	M399T781	2.54171	-4.79857	0.0610963	399.267	399.266	399.273	780.874	780.704	781.057	4	2	2	http://metlin.scripps.edu/metabo_list.php?mass_min=398.12&mass_max=398.42	9.9296e+06	1.12831e+07	5.33028e+06	3.01556e+06
973	M378T469	2.40307	-8.36314	0.0611178	378.181	378.181	378.182	469.306	469.201	469.531	4	2	2	http://metlin.scripps.edu/metabo_list.php?mass_min=377.03&mass_max=377.33	1.71037e+09	1.65599e+09	8.14748e+08	5.86107e+08
974	M214T371	2.34377	-7.74726	0.0611665	214.088	214.086	214.09	371.14	370.845	371.613	4	2	2	http://metlin.scripps.edu/metabo_list.php?mass_min=212.94&mass_max=213.24	1.86373e+07	2.14948e+07	8.96628e+06	8.15661e+06
975	M593T527	1.64482	-3.86047	0.0611931	593.195	593.195	593.195	526.922	526.922	526.922	1	1	0	http://metlin.scripps.edu/metabo_list.php?mass_min=592.05&mass_max=592.35	1.38001e+06	1.58867e+06	1.01123e+06	793638
976	M871T315	2.2131	-4.31284	0.0613301	871.289	871.289	871.289	314.868	313.694	315.885	4	2	2	http://metlin.scripps.edu/metabo_list.php?mass_min=870.14&mass_max=870.44	2.63706e+07	3.25377e+07	1.54316e+07	1.11864e+07
977	M462T312	2.21196	-3.8894	0.061427	462.116	462.114	462.119	311.91	310.722	313.099	2	2	0	http://metlin.scripps.edu/metabo_list.php?mass_min=460.97&mass_max=461.27	725769	896193	442734	290536
978	M445T836	2.57769	-4.30845	0.0614523	445.311	445.307	445.312	835.929	835.626	836.101	4	2	2	http://metlin.scripps.edu/metabo_list.php?mass_min=444.16&mass_max=444.46	8.03513e+07	9.44262e+07	4.4129e+07	2.3675e+07
979	M242T682	2.3094	-4.26686	0.0615043	242.121	242.12	242.123	682.239	682.078	682.484	4	2	2	http://metlin.scripps.edu/metabo_list.php?mass_min=240.97&mass_max=241.27	1.49039e+07	1.8546e+07	8.51612e+06	5.96815e+06
980	M424T269	2.01249	4.89636	0.0615605	424.169	424.168	424.169	268.609	268.534	268.683	2	0	2	http://metlin.scripps.edu/metabo_list.php?mass_min=423.02&mass_max=423.32	1.44483e+06	1.77169e+06	3.52623e+06	2.94696e+06
981	M822T774	2.895	-5.2866	0.0616028	821.574	821.574	821.574	774.231	773.919	774.314	3	2	1	http://metlin.scripps.edu/metabo_list.php?mass_min=820.42&mass_max=820.72	2.25539e+06	2.52318e+06	1.08912e+06	561513
982	M324T683	2.48353	-4.23566	0.0616336	324.134	324.134	324.135	682.551	682.484	682.707	4	2	2	http://metlin.scripps.edu/metabo_list.php?mass_min=322.98&mass_max=323.28	2.6846e+07	3.38316e+07	1.46872e+07	9.74483e+06
983	M284T409	5.68646	-7.20667	0.0616396	284.186	284.186	284.186	408.501	408.245	408.758	2	2	0	http://metlin.scripps.edu/metabo_list.php?mass_min=283.04&mass_max=283.34	2.30842e+07	2.87254e+07	5.46119e+06	3.64984e+06
984	M351T524	3.40035	5.72396	0.0616789	351.188	351.187	351.188	523.532	523.296	524.339	4	2	2	http://metlin.scripps.edu/metabo_list.php?mass_min=350.04&mass_max=350.34	7.85935e+07	1.11637e+08	3.59729e+08	2.87121e+08
985	M275T473	2.83427	-5.23273	0.0616789	275.162	275.162	275.162	473.1	472.628	473.173	3	2	1	http://metlin.scripps.edu/metabo_list.php?mass_min=274.01&mass_max=274.31	6.1787e+07	7.70596e+07	2.84198e+07	2.05688e+07
986	M635T702	2.45027	-5.6606	0.061695	635.38	635.375	635.382	701.942	701.552	702.197	4	2	2	http://metlin.scripps.edu/metabo_list.php?mass_min=634.23&mass_max=634.53	1.26742e+07	1.38366e+07	6.66801e+06	4.15152e+06
987	M252T121	6.54647	9.99909	0.061721	252.073	252.07	252.076	120.712	120.567	120.857	2	0	2	http://metlin.scripps.edu/metabo_list.php?mass_min=250.92&mass_max=251.22	945409	1.03409e+06	5.93214e+06	7.02658e+06
988	M394T324	1.88553	-5.08302	0.0617803	394.176	394.176	394.176	324.145	324.017	324.537	4	2	2	http://metlin.scripps.edu/metabo_list.php?mass_min=393.03&mass_max=393.33	3.86872e+09	4.22079e+09	2.47481e+09	1.81549e+09
989	M1289T489	2.99209	-4.21575	0.0617947	1289.47	1289.47	1289.47	488.838	488.838	488.838	1	1	0	http://metlin.scripps.edu/metabo_list.php?mass_min=1288.32&mass_max=1288.62	8.60688e+06	6.64454e+06	3.24696e+06	1.85028e+06
990	M715T371	5.24714	-9.05071	0.0618757	715.213	715.213	715.217	370.984	370.676	371.157	4	2	2	http://metlin.scripps.edu/metabo_list.php?mass_min=714.06&mass_max=714.36	7.00936e+06	8.36327e+06	1.58424e+06	1.34548e+06
991	M417T324	2.12568	-4.86922	0.061876	417.161	417.161	417.162	324.066	323.913	324.22	2	2	0	http://metlin.scripps.edu/metabo_list.php?mass_min=416.01&mass_max=416.31	7.26656e+06	8.78589e+06	4.20581e+06	3.34588e+06
992	M776T781	2.74519	-4.94024	0.0618972	775.541	775.541	775.542	780.99	780.802	781.057	4	2	2	http://metlin.scripps.edu/metabo_list.php?mass_min=774.39&mass_max=774.69	3.78299e+07	4.28652e+07	1.92384e+07	1.01568e+07
993	M946T375	50.0704	10.247	0.0619051	946.321	946.321	946.321	374.776	374.741	374.811	2	0	2	http://metlin.scripps.edu/metabo_list.php?mass_min=945.17&mass_max=945.47	67028.1	60956.9	3.51056e+06	2.8977e+06
994	M1430T713	6.14369	-7.68005	0.0619354	1429.62	1429.62	1429.62	713.304	713.263	713.344	2	2	0	http://metlin.scripps.edu/metabo_list.php?mass_min=1428.47&mass_max=1428.77	2.0724e+06	1.95327e+06	538813	116439
995	M295T683	2.45617	-4.18889	0.0619402	295.107	295.107	295.107	682.551	682.484	682.707	4	2	2	http://metlin.scripps.edu/metabo_list.php?mass_min=293.96&mass_max=294.26	1.90928e+07	2.40515e+07	1.05646e+07	7.00117e+06
996	M340T405	2.67902	5.36266	0.0621441	340.186	340.186	340.187	404.646	404.428	404.864	2	0	2	http://metlin.scripps.edu/metabo_list.php?mass_min=339.04&mass_max=339.34	2.30878e+06	4.11116e+06	9.04448e+06	8.15469e+06
997	M350T487	26.7329	-10.2014	0.0621797	350.162	350.138	350.186	487.002	486.596	487.904	4	2	2	http://metlin.scripps.edu/metabo_list.php?mass_min=349.01&mass_max=349.31	3.05486e+08	2.52809e+08	1.07066e+07	1.01776e+07
998	M753T788_2	2.64047	-4.20986	0.062185	753.496	753.496	753.496	787.666	787.487	787.696	3	2	1	http://metlin.scripps.edu/metabo_list.php?mass_min=752.35&mass_max=752.65	2.25126e+07	2.67126e+07	1.2285e+07	6.35765e+06
999	M282T497	1.81432	-3.84341	0.0622396	282.126	282.125	282.144	497.033	494.182	498.901	3	2	1	http://metlin.scripps.edu/metabo_list.php?mass_min=280.98&mass_max=281.28	5.71032e+06	6.78566e+06	3.93694e+06	2.95048e+06
1000	M582T917	1.06183	-8.56666	0.0622447	582.386	582.385	582.386	916.829	916.629	916.837	3	2	1	http://metlin.scripps.edu/metabo_list.php?mass_min=581.24&mass_max=581.54	3.39968e+06	3.40925e+06	3.18357e+06	3.22885e+06
1001	M415T784	2.49714	-4.65988	0.0622607	415.254	415.253	415.254	783.898	783.714	784.09	4	2	2	http://metlin.scripps.edu/metabo_list.php?mass_min=414.1&mass_max=414.4	1.70904e+07	1.95116e+07	9.34835e+06	5.30923e+06
1002	M734T787	2.73793	-4.85413	0.0623374	733.521	733.521	733.521	787.373	787.349	787.487	4	2	2	http://metlin.scripps.edu/metabo_list.php?mass_min=732.37&mass_max=732.67	6.37485e+06	7.2508e+06	3.26412e+06	1.71251e+06
1003	M762T705	2.5584	-5.85752	0.0623432	761.526	761.526	761.526	705.017	704.86	705.082	4	2	2	http://metlin.scripps.edu/metabo_list.php?mass_min=760.38&mass_max=760.68	4.34375e+07	4.72044e+07	2.20348e+07	1.33943e+07
1004	M459T715	1.69367	-4.53147	0.0623656	459.238	459.238	459.238	714.858	714.598	714.967	4	2	2	http://metlin.scripps.edu/metabo_list.php?mass_min=458.09&mass_max=458.39	2.79335e+09	3.25727e+09	1.93103e+09	1.64147e+09
1005	M590T766	2.62698	-4.67731	0.0624435	590.359	590.359	590.359	766.03	765.905	766.084	4	2	2	http://metlin.scripps.edu/metabo_list.php?mass_min=589.21&mass_max=589.51	1.04844e+07	1.31776e+07	5.30419e+06	3.7031e+06
1006	M665T659	2.89114	-9.39799	0.0624545	665.314	665.314	665.314	658.501	658.447	658.687	4	2	2	http://metlin.scripps.edu/metabo_list.php?mass_min=664.16&mass_max=664.46	2.54595e+07	2.92304e+07	9.71789e+06	9.19851e+06
1007	M531T472	21.6737	-9.82886	0.0624677	531.278	531.278	531.278	471.875	471.645	472.106	2	2	0	http://metlin.scripps.edu/metabo_list.php?mass_min=530.13&mass_max=530.43	5.94203e+06	7.2138e+06	359739	247257
1008	M249T85	2.09876	7.95758	0.0624859	248.958	248.889	249.026	85.4254	83.7864	87.1217	4	2	2	http://metlin.scripps.edu/metabo_list.php?mass_min=247.81&mass_max=248.11	479947	514006	976558	1.10951e+06
1009	M436T635	4.24332	-5.50153	0.0625383	436.268	436.268	436.269	635.151	635.1	635.578	4	2	2	http://metlin.scripps.edu/metabo_list.php?mass_min=435.12&mass_max=435.42	1.90458e+07	2.45149e+07	6.4286e+06	3.83712e+06
1010	M260T351	3.28042	-8.72307	0.0625793	260.089	260.089	260.089	351.48	349.961	353.506	4	2	2	http://metlin.scripps.edu/metabo_list.php?mass_min=258.94&mass_max=259.24	4.35716e+07	5.09655e+07	1.51321e+07	1.36865e+07
1011	M296T533	3.03627	-7.89477	0.0626579	296.191	296.159	296.222	533.232	526.51	541.661	4	2	2	http://metlin.scripps.edu/metabo_list.php?mass_min=295.04&mass_max=295.34	4.91909e+07	5.80051e+07	1.87963e+07	1.65089e+07
1012	M247T340	3.22939	-5.26468	0.0626899	247.126	247.126	247.126	339.902	339.902	339.902	1	0	1	http://metlin.scripps.edu/metabo_list.php?mass_min=245.98&mass_max=246.28	6.66195e+06	8.43066e+06	2.78069e+06	1.89283e+06
1013	M983T834	3.78926	-4.56993	0.0626917	982.689	982.689	982.689	833.885	833.885	833.885	1	1	0	http://metlin.scripps.edu/metabo_list.php?mass_min=981.54&mass_max=981.84	5.51683e+06	7.27316e+06	2.22605e+06	1.14928e+06
1014	M266T523	3.0501	5.3266	0.0627571	266.129	266.128	266.129	522.999	522.976	523.022	2	0	2	http://metlin.scripps.edu/metabo_list.php?mass_min=264.98&mass_max=265.28	2.13592e+06	3.01295e+06	8.74082e+06	6.96376e+06
1015	M765T633	2.22705	-6.77567	0.0628099	764.537	764.537	764.537	633.125	633.125	633.125	1	1	0	http://metlin.scripps.edu/metabo_list.php?mass_min=763.39&mass_max=763.69	3.15718e+06	3.33026e+06	1.70568e+06	1.20734e+06
1016	M869T694	2.41291	-5.63869	0.0628365	868.611	868.611	868.611	694.276	694.211	694.442	4	2	2	http://metlin.scripps.edu/metabo_list.php?mass_min=867.46&mass_max=867.76	1.0264e+07	1.11881e+07	5.45878e+06	3.43177e+06
1017	M813T469	2.34271	-6.62337	0.0628653	813.359	813.358	813.361	468.887	468.567	469.08	4	2	2	http://metlin.scripps.edu/metabo_list.php?mass_min=812.21&mass_max=812.51	1.32797e+08	1.25235e+08	6.55756e+07	4.45667e+07
1018	M809T323	3.51664	-5.21265	0.0628876	809.326	809.326	809.326	323.278	323.272	323.283	2	2	0	http://metlin.scripps.edu/metabo_list.php?mass_min=808.18&mass_max=808.48	9.76871e+06	1.24945e+07	3.85682e+06	2.474e+06
1019	M748T371	4.37321	-9.87732	0.0629701	748.256	748.256	748.256	370.761	370.676	370.845	2	2	0	http://metlin.scripps.edu/metabo_list.php?mass_min=747.11&mass_max=747.41	4.53076e+06	5.29637e+06	1.14988e+06	1.09724e+06
1020	M387T660	2.83527	-6.46042	0.0629804	387.231	387.229	387.232	660.003	659.724	660.282	2	2	0	http://metlin.scripps.edu/metabo_list.php?mass_min=386.08&mass_max=386.38	2.44906e+06	2.95644e+06	1.04799e+06	858523
1021	M314T287	2.3692	-4.59777	0.0630047	314.232	314.232	314.233	286.846	285.091	288.602	2	2	0	http://metlin.scripps.edu/metabo_list.php?mass_min=313.08&mass_max=313.38	3.45999e+07	2.78794e+07	1.52174e+07	1.11541e+07
1022	M729T369	3.80594	-7.27256	0.063256	729.253	729.253	729.253	369.283	369.283	369.283	1	1	0	http://metlin.scripps.edu/metabo_list.php?mass_min=728.1&mass_max=728.4	2.65193e+06	3.22176e+06	858032	685265
1023	M520T862	2.16065	-3.80166	0.0633586	520.333	520.333	520.333	862.349	862.227	862.4	3	2	1	http://metlin.scripps.edu/metabo_list.php?mass_min=519.18&mass_max=519.48	1.23864e+07	1.52547e+07	7.72194e+06	5.07099e+06
1024	M438T775	2.63374	-5.38622	0.0634204	437.778	437.778	437.778	774.549	773.919	774.633	3	2	1	http://metlin.scripps.edu/metabo_list.php?mass_min=436.63&mass_max=436.93	2.1943e+06	2.42493e+06	1.11663e+06	637240
1025	M578T323	5.78342	4.57802	0.0634736	578.373	578.373	578.374	322.922	322.737	323.106	2	0	2	http://metlin.scripps.edu/metabo_list.php?mass_min=577.22&mass_max=577.52	46702.4	837034	2.79426e+06	2.31675e+06
1026	M404T863	2.86586	-3.80769	0.0634781	403.796	403.796	403.796	862.651	862.551	862.732	4	2	2	http://metlin.scripps.edu/metabo_list.php?mass_min=402.65&mass_max=402.95	1.60936e+08	2.07584e+08	8.54758e+07	4.31141e+07
1027	M606T727	2.46826	-4.54294	0.063543	606.457	606.457	606.457	727.255	727.197	727.286	4	2	2	http://metlin.scripps.edu/metabo_list.php?mass_min=605.31&mass_max=605.61	3.2219e+06	3.6938e+06	1.78736e+06	1.01449e+06
1028	M397T543	1.38803	-8.97533	0.0635952	397.26	397.26	397.26	543.02	543.02	543.02	1	0	1	http://metlin.scripps.edu/metabo_list.php?mass_min=396.11&mass_max=396.41	2.20784e+07	2.23e+07	1.66684e+07	1.5304e+07
1029	M336T414	3.22079	-6.89888	0.0635979	336.253	336.253	336.253	414.452	414.452	414.452	1	1	0	http://metlin.scripps.edu/metabo_list.php?mass_min=335.1&mass_max=335.4	1.46024e+07	1.20715e+07	4.55982e+06	3.722e+06
1030	M717T710	2.53667	-5.52076	0.0637246	717.499	717.499	717.499	710.162	710.117	710.229	4	2	2	http://metlin.scripps.edu/metabo_list.php?mass_min=716.35&mass_max=716.65	7.3243e+07	8.03198e+07	3.79145e+07	2.26225e+07
1031	M552T671	2.58952	-9.51833	0.0637802	552.385	552.384	552.385	670.682	670.554	670.839	4	2	2	http://metlin.scripps.edu/metabo_list.php?mass_min=551.23&mass_max=551.53	3.0625e+07	3.02224e+07	1.37004e+07	9.79716e+06
1032	M823T362	3.2337	-7.48829	0.0637862	823.36	823.36	823.361	362.372	361.937	362.806	2	2	0	http://metlin.scripps.edu/metabo_list.php?mass_min=822.21&mass_max=822.51	9.58875e+06	9.12068e+06	3.72346e+06	2.0623e+06
1033	M378T433	3.67919	-6.38389	0.0638007	378.133	378.133	378.133	433.027	432.861	433.194	2	2	0	http://metlin.scripps.edu/metabo_list.php?mass_min=376.98&mass_max=377.28	3.09055e+06	3.82985e+06	1.07885e+06	802109
1034	M691T350	14.475	-9.51493	0.0638048	691.248	691.247	691.248	349.588	348.942	350.235	2	2	0	http://metlin.scripps.edu/metabo_list.php?mass_min=690.1&mass_max=690.4	1.06329e+07	1.29257e+07	931981	695553
1035	M499T464	1.57028	-7.41959	0.0638097	499.23	499.23	499.231	463.981	463.644	464.182	4	2	2	http://metlin.scripps.edu/metabo_list.php?mass_min=498.08&mass_max=498.38	2.93002e+07	3.21933e+07	1.99957e+07	1.91652e+07
1036	M688T794	2.65115	-4.3426	0.0639062	688.492	688.492	688.493	794.317	794.241	794.395	4	2	2	http://metlin.scripps.edu/metabo_list.php?mass_min=687.34&mass_max=687.64	3.67446e+07	4.29891e+07	1.98274e+07	1.02477e+07
1037	M516T260	2.44817	8.20071	0.0640525	516.166	516.166	516.166	259.968	259.968	259.968	1	0	1	http://metlin.scripps.edu/metabo_list.php?mass_min=515.02&mass_max=515.32	1.16045e+06	1.64379e+06	3.37877e+06	3.4865e+06
1038	M447T225	2.27954	-5.23143	0.0641303	447.196	447.196	447.196	224.824	224.782	224.865	2	2	0	http://metlin.scripps.edu/metabo_list.php?mass_min=446.05&mass_max=446.35	5.43491e+06	5.97848e+06	3.05213e+06	1.95475e+06
1039	M895T382	3.38171	-8.20613	0.0641655	895.33	895.329	895.331	381.799	381.058	382.539	2	2	0	http://metlin.scripps.edu/metabo_list.php?mass_min=894.18&mass_max=894.48	7.54377e+06	7.82895e+06	2.91701e+06	1.62883e+06
1040	M431T263	2.36371	7.95423	0.064177	431.204	431.204	431.205	263.225	261.365	263.543	4	2	2	http://metlin.scripps.edu/metabo_list.php?mass_min=430.05&mass_max=430.35	6.85387e+06	9.59517e+06	1.97714e+07	1.91094e+07
1041	M709T794	2.60627	-4.44629	0.0641946	709.469	709.469	709.47	794.393	794.244	794.56	4	2	2	http://metlin.scripps.edu/metabo_list.php?mass_min=708.32&mass_max=708.62	4.54342e+07	5.26378e+07	2.45788e+07	1.30504e+07
1042	M344T794	1.55558	-3.77636	0.0642872	344.274	344.262	344.297	793.754	791.067	794.714	4	2	2	http://metlin.scripps.edu/metabo_list.php?mass_min=343.12&mass_max=343.42	1.12072e+07	1.27361e+07	8.53116e+06	6.86072e+06
1043	M254T178	5.3832	-7.00758	0.0643877	254.106	254.106	254.106	178.32	178.32	178.32	1	1	0	http://metlin.scripps.edu/metabo_list.php?mass_min=252.96&mass_max=253.26	3.56455e+06	4.45284e+06	885004	604331
1044	M515T409	1.77219	-4.23076	0.0644306	515.225	515.225	515.225	409.454	408.974	410.207	4	2	2	http://metlin.scripps.edu/metabo_list.php?mass_min=514.08&mass_max=514.38	1.40235e+07	1.57393e+07	9.66718e+06	7.12716e+06
1045	M413T487	2.53008	-5.86429	0.0644568	413.193	413.189	413.198	487.314	486.911	487.591	4	2	2	http://metlin.scripps.edu/metabo_list.php?mass_min=412.04&mass_max=412.34	2.12718e+07	1.75779e+07	8.45308e+06	6.90204e+06
1046	M325T270	15.236	-9.55807	0.0646358	325.118	325.118	325.118	269.987	269.827	270.146	2	2	0	http://metlin.scripps.edu/metabo_list.php?mass_min=323.97&mass_max=324.27	1.59323e+07	1.93727e+07	1.29601e+06	1.0212e+06
1047	M395T324	1.89246	-5.07792	0.0646692	395.178	395.178	395.178	324.145	324.017	324.537	4	2	2	http://metlin.scripps.edu/metabo_list.php?mass_min=394.03&mass_max=394.33	9.75267e+08	1.06147e+09	6.22301e+08	4.53933e+08
1048	M466T354	15.7248	9.63147	0.064692	466.219	466.219	466.219	353.953	353.836	354.071	2	0	2	http://metlin.scripps.edu/metabo_list.php?mass_min=465.07&mass_max=465.37	1.89933e+06	2.32239e+06	3.6413e+07	2.99727e+07
1049	M208T275	4.75141	-9.49304	0.0646999	208.126	208.126	208.126	274.648	274.648	274.648	1	1	0	http://metlin.scripps.edu/metabo_list.php?mass_min=206.98&mass_max=207.28	979280	1.1562e+06	232537	216904
1050	M236T711	11.2275	9.13555	0.0647315	236.172	236.172	236.172	710.977	710.866	711.087	2	0	2	http://metlin.scripps.edu/metabo_list.php?mass_min=235.02&mass_max=235.32	1.10466e+06	1.48246e+06	1.59593e+07	1.30877e+07
1051	M285T234	6.48853	-8.37572	0.064776	285.179	285.179	285.18	234.193	233.887	234.5	2	2	0	http://metlin.scripps.edu/metabo_list.php?mass_min=284.03&mass_max=284.33	5.84445e+06	7.12887e+06	1.12905e+06	870376
1052	M235T656	6.82122	7.92182	0.0647954	235.169	235.169	235.169	656.211	656.177	656.245	2	0	2	http://metlin.scripps.edu/metabo_list.php?mass_min=234.02&mass_max=234.32	1.59351e+07	2.2486e+07	1.44771e+08	1.17308e+08
1053	M607T539	3.52256	6.62286	0.0648054	607.266	607.241	607.287	539.295	536.779	541.822	4	2	2	http://metlin.scripps.edu/metabo_list.php?mass_min=606.12&mass_max=606.42	5.89539e+06	7.57086e+06	2.61417e+07	2.1294e+07
1054	M687T794	2.64466	-4.31907	0.0648099	687.489	687.489	687.489	794.317	794.241	794.395	4	2	2	http://metlin.scripps.edu/metabo_list.php?mass_min=686.34&mass_max=686.64	9.76462e+07	1.14243e+08	5.28596e+07	2.72602e+07
1055	M478T533	1.94481	-7.17075	0.0648183	478.25	478.25	478.251	532.959	532.756	533.222	4	2	2	http://metlin.scripps.edu/metabo_list.php?mass_min=477.1&mass_max=477.4	9.40467e+07	1.07103e+08	5.36673e+07	4.97616e+07
1056	M449T339	10.8588	-8.92357	0.0648563	449.193	449.192	449.193	338.531	338.365	338.697	2	2	0	http://metlin.scripps.edu/metabo_list.php?mass_min=448.04&mass_max=448.34	1.93154e+07	1.57845e+07	1.88346e+06	1.34894e+06
1057	M235T711	8.08809	8.92381	0.0648951	235.169	235.169	235.169	710.977	710.866	711.087	2	0	2	http://metlin.scripps.edu/metabo_list.php?mass_min=234.02&mass_max=234.32	9.59942e+06	1.21799e+07	9.66295e+07	7.95239e+07
1058	M571T275	11.3691	-9.75359	0.0649588	571.272	571.272	571.272	275.306	275.285	275.326	2	2	0	http://metlin.scripps.edu/metabo_list.php?mass_min=570.12&mass_max=570.42	2.58667e+06	3.12023e+06	246288	255678
1059	M341T544	1.68693	-4.51417	0.0650229	341.169	341.169	341.17	544.401	544.35	544.452	2	0	2	http://metlin.scripps.edu/metabo_list.php?mass_min=340.02&mass_max=340.32	6.95478e+06	7.63423e+06	4.88766e+06	3.76061e+06
1060	M820T408	19.1815	-8.90942	0.0650737	820.339	820.338	820.339	408.338	408.245	408.432	2	2	0	http://metlin.scripps.edu/metabo_list.php?mass_min=819.19&mass_max=819.49	4.9982e+06	4.04657e+06	307116	164420
1061	M556T414	27.1989	9.11025	0.0650746	556.254	556.254	556.254	413.821	413.767	413.875	2	0	2	http://metlin.scripps.edu/metabo_list.php?mass_min=555.1&mass_max=555.4	3.25778e+06	1.5031e+06	7.15346e+07	5.79563e+07
1062	M724T714	2.51985	-4.16252	0.0650765	723.826	723.825	723.826	713.638	713.577	713.706	4	2	2	http://metlin.scripps.edu/metabo_list.php?mass_min=722.68&mass_max=722.98	3.33323e+06	2.8273e+06	1.59013e+06	854678
1063	M734T435	3.68192	5.96125	0.0651141	734.315	734.315	734.315	434.898	434.853	434.942	2	0	2	http://metlin.scripps.edu/metabo_list.php?mass_min=733.17&mass_max=733.47	1.17741e+06	1.65623e+06	4.62588e+06	5.80738e+06
1064	M599T371	13.2293	-9.52899	0.0651382	599.129	599.128	599.13	370.76	370.532	370.988	2	2	0	http://metlin.scripps.edu/metabo_list.php?mass_min=597.98&mass_max=598.28	810681	984365	61553.8	74133.1
1065	M641T1009	1.02123	-4.72542	0.0651577	640.536	640.535	640.536	1008.54	1008.25	1009.01	4	2	2	http://metlin.scripps.edu/metabo_list.php?mass_min=639.39&mass_max=639.69	3.84049e+06	3.87005e+06	3.76682e+06	3.78345e+06
1066	M680T696	2.09343	-6.44542	0.0651895	680.413	680.413	680.413	696.168	695.955	696.381	2	2	0	http://metlin.scripps.edu/metabo_list.php?mass_min=679.26&mass_max=679.56	1.34707e+06	1.42283e+06	767215	555927
1067	M710T794	2.62269	-4.51338	0.0653599	710.473	710.473	710.473	794.393	794.244	794.56	4	2	2	http://metlin.scripps.edu/metabo_list.php?mass_min=709.32&mass_max=709.62	1.71626e+07	1.97672e+07	9.21097e+06	4.8699e+06
1068	M257T710	30.5297	9.23522	0.0653743	257.151	257.151	257.151	710.177	710.124	710.229	2	0	2	http://metlin.scripps.edu/metabo_list.php?mass_min=256&mass_max=256.3	198487	411901	1.02875e+07	8.34748e+06
1069	M327T781	2.58405	-4.8321	0.0654091	326.709	326.709	326.709	780.738	780.629	780.802	3	2	1	http://metlin.scripps.edu/metabo_list.php?mass_min=325.56&mass_max=325.86	7.68453e+06	8.67464e+06	4.07739e+06	2.25344e+06
1070	M666T801	2.66938	-4.38539	0.0654177	666.447	666.447	666.447	801.395	801.3	801.434	4	2	2	http://metlin.scripps.edu/metabo_list.php?mass_min=665.3&mass_max=665.6	1.53115e+07	1.78205e+07	8.20776e+06	4.20414e+06
1071	M645T801	2.67742	-4.20164	0.0654563	645.469	645.469	645.469	801.209	801.095	801.372	4	2	2	http://metlin.scripps.edu/metabo_list.php?mass_min=644.32&mass_max=644.62	1.15132e+07	1.36027e+07	6.24428e+06	3.13634e+06
1072	M613T706	2.28158	-4.37965	0.0654975	613.34	613.34	613.341	706.37	706.281	707.657	3	2	1	http://metlin.scripps.edu/metabo_list.php?mass_min=612.19&mass_max=612.49	2.60604e+06	2.9872e+06	1.52959e+06	921883
1073	M408T781	2.58437	-4.89407	0.0655716	407.778	407.778	407.778	780.99	780.802	781.057	4	2	2	http://metlin.scripps.edu/metabo_list.php?mass_min=406.63&mass_max=406.93	3.78339e+07	4.25631e+07	2.00002e+07	1.11087e+07
1074	M771T470	3.35311	-4.51947	0.0656419	771.359	771.355	771.359	470.173	470.169	471.32	3	2	1	http://metlin.scripps.edu/metabo_list.php?mass_min=770.21&mass_max=770.51	5.6671e+06	7.41135e+06	2.47021e+06	1.43018e+06
1075	M518T392	7.02627	7.32756	0.06565	518.14	518.14	518.14	392.019	392.002	392.036	2	0	2	http://metlin.scripps.edu/metabo_list.php?mass_min=516.99&mass_max=517.29	359723	229273	2.30247e+06	1.83597e+06
1076	M368T486	6.78814	-7.10487	0.0656591	368.197	368.197	368.197	485.703	485.686	485.719	2	2	0	http://metlin.scripps.edu/metabo_list.php?mass_min=367.05&mass_max=367.35	1.73891e+08	1.38017e+08	2.83204e+07	1.76287e+07
1077	M405T863	2.8302	-3.75849	0.0657414	404.799	404.799	404.799	862.651	862.551	862.732	4	2	2	http://metlin.scripps.edu/metabo_list.php?mass_min=403.65&mass_max=403.95	1.9179e+07	2.48762e+07	1.02829e+07	5.28318e+06
1078	M742T392	9.71291	-8.12611	0.0658613	742.279	742.279	742.279	392.148	392.002	392.391	4	2	2	http://metlin.scripps.edu/metabo_list.php?mass_min=741.13&mass_max=741.43	3.85193e+07	3.10103e+07	4.37406e+06	2.78441e+06
1079	M553T598	2.36647	-8.51666	0.0659702	553.273	553.272	553.274	597.85	597.554	598.146	2	0	2	http://metlin.scripps.edu/metabo_list.php?mass_min=552.12&mass_max=552.42	5.53094e+06	5.6627e+06	2.73875e+06	1.99134e+06
1080	M814T469	2.35916	-6.65612	0.0661014	814.361	814.361	814.362	468.887	468.567	469.08	4	2	2	http://metlin.scripps.edu/metabo_list.php?mass_min=813.21&mass_max=813.51	6.71083e+07	6.35347e+07	3.30526e+07	2.23243e+07
1081	M970T392	159.522	9.56899	0.0661725	970.331	970.331	970.331	391.86	391.685	392.036	2	0	2	http://metlin.scripps.edu/metabo_list.php?mass_min=969.18&mass_max=969.48	650228	319644	8.539e+07	6.93263e+07
1082	M362T162	2.77304	-6.19133	0.0661946	362.254	362.254	362.254	161.903	158.674	164.127	4	2	2	http://metlin.scripps.edu/metabo_list.php?mass_min=361.1&mass_max=361.4	5.84209e+06	6.28169e+06	2.77217e+06	1.59985e+06
1083	M749T788	2.58472	-4.20019	0.0662008	748.542	748.541	748.542	787.681	787.487	787.706	4	2	2	http://metlin.scripps.edu/metabo_list.php?mass_min=747.39&mass_max=747.69	1.53518e+09	1.80508e+09	8.49192e+08	4.43118e+08
1084	M547T861	2.75518	-3.7852	0.0662141	547.333	547.333	547.333	861.076	860.72	861.259	3	2	1	http://metlin.scripps.edu/metabo_list.php?mass_min=546.18&mass_max=546.48	9.65924e+06	1.25176e+07	5.22459e+06	2.82454e+06
1085	M346T716	2.61097	-4.42878	0.0663199	345.753	345.752	345.753	715.846	715.776	715.918	4	2	2	http://metlin.scripps.edu/metabo_list.php?mass_min=344.6&mass_max=344.9	1.20703e+07	1.39557e+07	6.53252e+06	3.43545e+06
1086	M750T788	2.58336	-4.21686	0.0664102	749.544	749.544	749.544	787.577	787.372	787.706	4	2	2	http://metlin.scripps.edu/metabo_list.php?mass_min=748.39&mass_max=748.69	6.22619e+08	7.30738e+08	3.44101e+08	1.79773e+08
1087	M287T189	3.11734	-7.59936	0.0664955	287.129	287.129	287.129	188.885	188.82	188.951	2	2	0	http://metlin.scripps.edu/metabo_list.php?mass_min=285.98&mass_max=286.28	6.24169e+06	7.42685e+06	2.34054e+06	2.04414e+06
1088	M538T745	2.69577	-9.3175	0.0665101	538.376	538.375	538.377	744.716	744.626	744.989	4	2	2	http://metlin.scripps.edu/metabo_list.php?mass_min=537.23&mass_max=537.53	3.44249e+07	3.47752e+07	1.51643e+07	1.05056e+07
1089	M636T702	2.2896	-6.61868	0.0665576	636.382	636.377	636.384	702.153	701.782	702.217	4	2	2	http://metlin.scripps.edu/metabo_list.php?mass_min=635.23&mass_max=635.53	3.89978e+06	4.1153e+06	2.07389e+06	1.42676e+06
1090	M241T391	2.23533	-3.94793	0.0666148	241.062	241.061	241.065	390.576	390.42	390.819	4	2	2	http://metlin.scripps.edu/metabo_list.php?mass_min=239.91&mass_max=240.21	8.64028e+06	1.08275e+07	5.16735e+06	3.54179e+06
1091	M500T680	2.24969	-8.38257	0.0666225	499.843	499.843	499.844	679.924	679.782	679.996	4	2	2	http://metlin.scripps.edu/metabo_list.php?mass_min=498.69&mass_max=498.99	2.44926e+07	2.50788e+07	1.26335e+07	9.40124e+06
1092	M795T682_1	4.50495	-5.39035	0.0666454	794.812	794.812	794.812	682.284	682.284	682.284	1	1	0	http://metlin.scripps.edu/metabo_list.php?mass_min=793.66&mass_max=793.96	2.54098e+06	3.30896e+06	824742	473817
1093	M796T781	2.82961	-5.06709	0.0667131	795.576	795.576	795.577	780.721	780.629	780.802	4	2	2	http://metlin.scripps.edu/metabo_list.php?mass_min=794.43&mass_max=794.73	1.4472e+07	1.62179e+07	7.17575e+06	3.67022e+06
1094	M379T468	2.39897	-8.28064	0.0667304	379.183	379.183	379.183	468.18	467.597	468.896	4	2	2	http://metlin.scripps.edu/metabo_list.php?mass_min=378.03&mass_max=378.33	4.32073e+08	4.20892e+08	2.07287e+08	1.48267e+08
1095	M423T700	2.27438	-5.70624	0.0667367	422.783	422.783	422.783	699.511	699.454	699.595	4	2	2	http://metlin.scripps.edu/metabo_list.php?mass_min=421.63&mass_max=421.93	3.1213e+07	3.36822e+07	1.72038e+07	1.13293e+07
1096	M324T527	5.59585	-9.10078	0.0668401	324.16	324.16	324.16	526.922	526.922	526.922	1	1	0	http://metlin.scripps.edu/metabo_list.php?mass_min=323.01&mass_max=323.31	9.43829e+06	7.88311e+06	1.62658e+06	1.46882e+06
1097	M228T683	2.2668	-4.06816	0.0668958	228.079	228.079	228.08	683.322	683.222	683.421	2	2	0	http://metlin.scripps.edu/metabo_list.php?mass_min=226.93&mass_max=227.23	9.51057e+06	1.19279e+07	5.56991e+06	3.88768e+06
1098	M696T438	2.21108	3.72256	0.0669099	696.311	696.311	696.311	437.905	437.905	437.905	1	0	1	http://metlin.scripps.edu/metabo_list.php?mass_min=695.16&mass_max=695.46	656358	1.08156e+06	2.10767e+06	1.735e+06
1099	M635T275	2.56045	9.03355	0.0670388	635.214	635.214	635.214	275.099	275.099	275.099	1	0	1	http://metlin.scripps.edu/metabo_list.php?mass_min=634.06&mass_max=634.36	292518	303459	814167	711802
1100	M676T642	2.1793	-4.95343	0.0672196	676.474	676.464	676.479	642.21	642.049	642.714	4	2	2	http://metlin.scripps.edu/metabo_list.php?mass_min=675.32&mass_max=675.62	1.26139e+07	1.39322e+07	7.38204e+06	4.79898e+06
1101	M751T787	2.58299	-4.21674	0.067404	750.547	750.546	750.547	787.431	787.372	787.666	4	2	2	http://metlin.scripps.edu/metabo_list.php?mass_min=749.4&mass_max=749.7	1.6505e+08	1.93372e+08	9.12412e+07	4.75214e+07
1102	M969T392	75387.2	9.40037	0.0674691	969.328	969.328	969.328	391.86	391.685	392.036	2	0	2	http://metlin.scripps.edu/metabo_list.php?mass_min=968.18&mass_max=968.48	0	3467.83	1.4462e+08	1.1681e+08
1103	M796T476	5.12673	4.79779	0.0676003	796.398	796.364	796.405	475.996	468.896	482.377	4	2	2	http://metlin.scripps.edu/metabo_list.php?mass_min=795.25&mass_max=795.55	3.06545e+06	7.2116e+06	3.02473e+07	2.24404e+07
1104	M545T655	2.48957	-4.7076	0.0676354	545.409	545.409	545.409	655.032	654.839	655.221	4	2	2	http://metlin.scripps.edu/metabo_list.php?mass_min=544.26&mass_max=544.56	5.68388e+06	6.42059e+06	3.10633e+06	1.75575e+06
1105	M388T781	2.54973	-4.91464	0.0676878	388.274	388.273	388.274	781.092	781.034	781.265	4	2	2	http://metlin.scripps.edu/metabo_list.php?mass_min=387.12&mass_max=387.42	6.43988e+07	7.20986e+07	3.42783e+07	1.92558e+07
1106	M508T750	2.74258	-8.21849	0.0677031	507.856	507.856	507.856	749.788	749.586	750.112	4	2	2	http://metlin.scripps.edu/metabo_list.php?mass_min=506.71&mass_max=507.01	7.59267e+06	7.80906e+06	3.39334e+06	2.22244e+06
1107	M850T694	2.41552	-5.76759	0.0678088	849.578	849.578	849.578	694.391	694.211	694.542	4	2	2	http://metlin.scripps.edu/metabo_list.php?mass_min=848.43&mass_max=848.73	7.79317e+06	8.41281e+06	4.11733e+06	2.59178e+06
1108	M593T766	2.32653	-4.69768	0.0681305	593.308	593.306	593.308	765.548	765.103	765.905	4	2	2	http://metlin.scripps.edu/metabo_list.php?mass_min=592.16&mass_max=592.46	6.08063e+07	7.5325e+07	3.31999e+07	2.53128e+07
1109	M290T452	4.30415	4.68211	0.068178	290.174	290.145	290.223	451.945	443.288	453.553	4	2	2	http://metlin.scripps.edu/metabo_list.php?mass_min=289.02&mass_max=289.32	2.41093e+06	4.87216e+06	1.34177e+07	1.79298e+07
1110	M551T739	2.95597	-8.73988	0.068238	550.879	550.879	550.879	738.681	738.663	738.699	2	2	0	http://metlin.scripps.edu/metabo_list.php?mass_min=549.73&mass_max=550.03	8.02885e+06	7.88033e+06	3.28868e+06	2.09338e+06
1111	M365T682	2.38676	-3.8692	0.0682486	365.17	365.17	365.17	682.228	682.172	682.284	2	2	0	http://metlin.scripps.edu/metabo_list.php?mass_min=364.02&mass_max=364.32	1.21998e+07	1.55255e+07	7.0605e+06	4.55577e+06
1112	M594T815	3.3597	-3.67481	0.0682681	594.367	594.367	594.367	815.429	815.395	815.462	2	2	0	http://metlin.scripps.edu/metabo_list.php?mass_min=593.22&mass_max=593.52	1.84229e+06	2.37602e+06	929911	325649
1113	M392T634	2.33273	-8.59189	0.0682859	391.788	391.788	391.788	633.781	633.747	633.815	2	1	1	http://metlin.scripps.edu/metabo_list.php?mass_min=390.64&mass_max=390.94	1.54295e+06	1.51465e+06	756038	554701
1114	M632T646	2.47073	-5.47881	0.0684214	632.456	632.456	632.457	645.98	645.945	646.005	4	2	2	http://metlin.scripps.edu/metabo_list.php?mass_min=631.31&mass_max=631.61	1.64996e+07	1.79912e+07	8.69871e+06	5.26101e+06
1115	M557T414	9.80356	8.31753	0.0684412	557.257	557.257	557.257	413.821	413.767	413.875	2	0	2	http://metlin.scripps.edu/metabo_list.php?mass_min=556.11&mass_max=556.41	1.82292e+06	2.59354e+06	2.39538e+07	1.93432e+07
1116	M386T658	3.91401	-7.531	0.0685105	386.237	386.229	386.242	658.33	658.134	658.687	4	2	2	http://metlin.scripps.edu/metabo_list.php?mass_min=385.09&mass_max=385.39	1.69605e+07	2.05695e+07	5.22463e+06	4.364e+06
1117	M409T781	2.50424	-4.36872	0.0685719	408.781	408.781	408.781	780.802	780.738	780.946	3	2	1	http://metlin.scripps.edu/metabo_list.php?mass_min=407.63&mass_max=407.93	4.23654e+06	4.88276e+06	2.35802e+06	1.28352e+06
1118	M446T405	6.31745	-8.12494	0.0686254	446.062	446.059	446.066	405.093	404.839	405.346	2	2	0	http://metlin.scripps.edu/metabo_list.php?mass_min=444.91&mass_max=445.21	1.45357e+06	1.18476e+06	233513	184113
1119	M530T565	3.18978	-3.88472	0.0688045	530.239	530.239	530.24	564.968	560.2	566.937	3	2	1	http://metlin.scripps.edu/metabo_list.php?mass_min=529.09&mass_max=529.39	6.69475e+06	5.42271e+06	2.76072e+06	1.03812e+06
1120	M462T837	2.3152	-5.18946	0.0688165	462.305	462.305	462.305	837.376	837.376	837.376	1	1	0	http://metlin.scripps.edu/metabo_list.php?mass_min=461.15&mass_max=461.45	2.83866e+06	3.46391e+06	1.50695e+06	1.21531e+06
1121	M465T690	2.25304	-6.71549	0.0688443	465.334	465.334	465.334	689.548	689.469	689.579	4	2	2	http://metlin.scripps.edu/metabo_list.php?mass_min=464.18&mass_max=464.48	7.34821e+07	7.71472e+07	3.93901e+07	2.74661e+07
1122	M360T480	43.742	8.34578	0.0689227	360.152	360.096	360.166	480.112	471.455	481.171	4	2	2	http://metlin.scripps.edu/metabo_list.php?mass_min=359&mass_max=359.3	2.32009e+06	2.11528e+07	5.72741e+08	4.54011e+08
1123	M491T374	30.6823	8.9168	0.0689676	491.175	491.121	491.175	374.491	374.423	390.819	3	1	2	http://metlin.scripps.edu/metabo_list.php?mass_min=490.02&mass_max=490.32	2.32502e+06	1.28153e+06	6.13086e+07	4.93486e+07
1124	M595T364	2.50555	5.71392	0.0690184	595.219	595.219	595.219	363.767	363.767	363.767	1	0	1	http://metlin.scripps.edu/metabo_list.php?mass_min=594.07&mass_max=594.37	170555	280859	543271	587773
1125	M407T367	3.28257	-7.18052	0.0690616	407.204	407.204	407.204	367.194	366.751	367.528	4	2	2	http://metlin.scripps.edu/metabo_list.php?mass_min=406.05&mass_max=406.35	2.30496e+07	2.78112e+07	8.37681e+06	7.11741e+06
1126	M337T490	1.66974	-3.8184	0.0691254	337.139	337.137	337.142	489.974	488.838	491.315	4	2	2	http://metlin.scripps.edu/metabo_list.php?mass_min=335.99&mass_max=336.29	1.20159e+07	1.05759e+07	7.7082e+06	5.8219e+06
1127	M776T489	3.86572	3.65294	0.0691533	776.375	776.375	776.384	488.631	488.186	489.108	3	1	2	http://metlin.scripps.edu/metabo_list.php?mass_min=775.23&mass_max=775.53	1.86676e+06	7.22954e+06	1.99358e+07	1.5228e+07
1128	M452T439	4.42362	-5.95624	0.0692796	452.131	452.131	452.131	439.208	439.208	439.208	1	1	0	http://metlin.scripps.edu/metabo_list.php?mass_min=450.98&mass_max=451.28	4.88642e+06	3.82678e+06	1.18421e+06	785488
1129	M432T767	2.49805	-5.58398	0.0693269	432.3	432.3	432.3	766.617	766.617	766.617	1	1	0	http://metlin.scripps.edu/metabo_list.php?mass_min=431.15&mass_max=431.45	5.46595e+07	5.93587e+07	2.84751e+07	1.71678e+07
1130	M530T675	2.36995	-7.7254	0.0693799	530.372	530.372	530.372	675.434	675.323	675.525	4	2	2	http://metlin.scripps.edu/metabo_list.php?mass_min=529.22&mass_max=529.52	7.09033e+07	7.31517e+07	3.56629e+07	2.51211e+07
1131	M758T468	3.52783	-8.82501	0.0694292	758.364	758.364	758.364	468.26	468.26	468.26	1	1	0	http://metlin.scripps.edu/metabo_list.php?mass_min=757.21&mass_max=757.51	5.34273e+06	5.26341e+06	1.93196e+06	1.07446e+06
1132	M492T375	12.6246	9.12502	0.0694451	492.178	492.178	492.178	374.616	374.491	374.741	2	0	2	http://metlin.scripps.edu/metabo_list.php?mass_min=491.03&mass_max=491.33	725113	748571	1.0241e+07	8.36375e+06
1133	M499T750	2.65533	-6.38245	0.0694754	498.842	498.842	498.842	749.586	749.586	749.586	1	0	1	http://metlin.scripps.edu/metabo_list.php?mass_min=497.69&mass_max=497.99	6.63139e+06	7.05407e+06	3.21104e+06	1.94292e+06
1134	M564T780	2.44328	-5.03323	0.0694967	564.359	564.359	564.359	780.072	779.992	780.153	4	2	2	http://metlin.scripps.edu/metabo_list.php?mass_min=563.21&mass_max=563.51	3.53392e+07	3.91367e+07	1.91773e+07	1.13046e+07
1135	M635T778	2.54453	-5.47569	0.0695715	635.385	635.385	635.386	777.541	777.052	777.76	4	2	2	http://metlin.scripps.edu/metabo_list.php?mass_min=634.23&mass_max=634.53	1.32007e+07	1.44004e+07	6.83097e+06	4.01629e+06
1136	M621T808	2.62623	-4.10535	0.0696249	621.417	621.416	621.417	808.409	808.325	808.565	4	2	2	http://metlin.scripps.edu/metabo_list.php?mass_min=620.27&mass_max=620.57	4.3682e+07	5.15537e+07	2.41396e+07	1.21237e+07
1137	M537T744	2.67738	-8.94724	0.0696666	537.376	537.376	537.392	744.348	744.009	744.41	4	2	2	http://metlin.scripps.edu/metabo_list.php?mass_min=536.23&mass_max=536.53	1.65455e+08	1.66966e+08	7.36932e+07	5.04656e+07
1138	M406T781	2.50713	-4.83941	0.0697088	406.303	406.303	406.303	780.874	780.738	781.034	4	2	2	http://metlin.scripps.edu/metabo_list.php?mass_min=405.15&mass_max=405.45	9.71153e+07	1.08708e+08	5.24413e+07	2.96539e+07
1139	M679T696	2.35159	-6.74056	0.0698968	679.411	679.411	679.411	696.492	696.279	696.704	2	2	0	http://metlin.scripps.edu/metabo_list.php?mass_min=678.26&mass_max=678.56	3.77281e+06	3.96065e+06	1.96035e+06	1.32825e+06
1140	M489T830	2.60886	-4.07486	0.0699556	489.339	489.338	489.339	829.724	829.6	829.754	4	2	2	http://metlin.scripps.edu/metabo_list.php?mass_min=488.19&mass_max=488.49	5.11637e+07	6.04728e+07	2.84452e+07	1.43461e+07
1141	M971T392	162.639	9.04988	0.0700156	971.334	971.334	971.334	391.86	391.685	392.036	2	0	2	http://metlin.scripps.edu/metabo_list.php?mass_min=970.18&mass_max=970.48	186443	117373	2.74193e+07	2.19933e+07
1142	M397T781	2.55511	-4.82513	0.0700399	396.788	396.788	396.788	780.874	780.704	781.057	4	2	2	http://metlin.scripps.edu/metabo_list.php?mass_min=395.64&mass_max=395.94	3.51628e+08	3.94271e+08	1.87895e+08	1.04029e+08
1143	M712T794	3.0063	-3.64271	0.0700602	712.477	712.477	712.477	794.318	794.241	794.395	2	2	0	http://metlin.scripps.edu/metabo_list.php?mass_min=711.33&mass_max=711.63	682888	868226	365685	150270
1144	M590T807	5.99053	-8.25608	0.0700645	589.915	589.915	589.915	806.78	806.78	806.78	1	1	0	http://metlin.scripps.edu/metabo_list.php?mass_min=588.77&mass_max=589.07	881187	1.07641e+06	178445	148336
1145	M820T774	2.74673	-5.52551	0.0700937	819.568	819.568	819.568	774.278	774.231	774.381	4	2	2	http://metlin.scripps.edu/metabo_list.php?mass_min=818.42&mass_max=818.72	1.83392e+07	2.00387e+07	9.02452e+06	4.94766e+06
1146	M547T704	2.42383	-5.84427	0.070114	547.334	547.334	547.334	703.625	703.415	703.8	4	2	2	http://metlin.scripps.edu/metabo_list.php?mass_min=546.18&mass_max=546.48	2.96628e+07	3.18699e+07	1.55821e+07	9.80444e+06
1147	M1431T713	5.66775	-4.80062	0.0701205	1430.62	1430.62	1430.62	713.461	713.344	713.577	2	2	0	http://metlin.scripps.edu/metabo_list.php?mass_min=1429.47&mass_max=1429.77	1.71554e+06	1.46688e+06	523767	37729.6
1148	M860T310	2.21356	-3.6775	0.0701423	860.303	860.282	860.306	310.488	309.104	310.722	3	2	1	http://metlin.scripps.edu/metabo_list.php?mass_min=859.15&mass_max=859.45	5.04112e+06	6.10084e+06	3.15629e+06	1.87722e+06
1149	M643T801	2.64508	-4.30709	0.07044	643.463	643.463	643.463	801.395	801.3	801.434	4	2	2	http://metlin.scripps.edu/metabo_list.php?mass_min=642.31&mass_max=642.61	1.38284e+08	1.60433e+08	7.49732e+07	3.79597e+07
1150	M373T524	4.95254	7.35632	0.0705189	373.17	373.17	373.17	524.123	523.989	524.258	2	0	2	http://metlin.scripps.edu/metabo_list.php?mass_min=372.02&mass_max=372.32	794328	1.01857e+06	4.96318e+06	4.01528e+06
1151	M490T375	33.8153	8.97713	0.0705632	490.172	490.171	490.172	374.547	374.433	374.741	4	2	2	http://metlin.scripps.edu/metabo_list.php?mass_min=489.02&mass_max=489.32	6.09754e+06	5.47574e+06	2.16828e+08	1.74527e+08
1152	M420T774	2.52953	-5.18786	0.0706063	419.804	419.804	419.804	774.278	774.231	774.381	4	2	2	http://metlin.scripps.edu/metabo_list.php?mass_min=418.65&mass_max=418.95	4.86742e+07	5.36024e+07	2.56438e+07	1.47893e+07
1153	M632T794	4.7736	-8.3848	0.0707702	632.439	632.439	632.439	794.318	794.241	794.395	2	2	0	http://metlin.scripps.edu/metabo_list.php?mass_min=631.29&mass_max=631.59	1.68287e+06	2.02999e+06	411511	366279
1154	M513T681	2.35547	-4.41562	0.0707835	513.271	513.268	513.273	680.518	680.296	680.817	4	2	2	http://metlin.scripps.edu/metabo_list.php?mass_min=512.12&mass_max=512.42	6.23792e+07	7.82838e+07	3.44165e+07	2.53011e+07
1155	M420T313	2.09208	4.60186	0.0708823	420.188	420.188	420.188	313.282	313.221	313.343	2	0	2	http://metlin.scripps.edu/metabo_list.php?mass_min=419.04&mass_max=419.34	1.02425e+07	1.28383e+07	2.65552e+07	2.17319e+07
1156	M759T374	3.0963	-6.01635	0.0708974	759.296	759.292	759.299	373.889	373.659	374.118	2	2	0	http://metlin.scripps.edu/metabo_list.php?mass_min=758.15&mass_max=758.45	3.6747e+06	3.40558e+06	1.51831e+06	768377
1157	M913T689	2.69896	-6.93227	0.0709128	912.637	912.637	912.637	689.166	688.92	689.251	4	2	2	http://metlin.scripps.edu/metabo_list.php?mass_min=911.49&mass_max=911.79	4.46444e+06	4.68234e+06	2.09524e+06	1.29376e+06
1158	M356T435	1.82162	4.65064	0.0709487	356.279	356.279	356.28	435.271	431.242	435.503	3	1	2	http://metlin.scripps.edu/metabo_list.php?mass_min=355.13&mass_max=355.43	1.8284e+07	1.5492e+07	3.34004e+07	2.81267e+07
1159	M594T766	2.4878	-4.89451	0.0710694	594.311	594.31	594.312	765.831	765.757	765.981	4	2	2	http://metlin.scripps.edu/metabo_list.php?mass_min=593.16&mass_max=593.46	2.17191e+07	2.70709e+07	1.11189e+07	8.49282e+06
1160	M588T651	2.37248	-5.36515	0.0711982	588.431	588.431	588.431	650.525	650.383	650.668	2	2	0	http://metlin.scripps.edu/metabo_list.php?mass_min=587.28&mass_max=587.58	1.91814e+07	2.08811e+07	1.04288e+07	6.45751e+06
1161	M956T684	4.42505	-4.96059	0.0712368	955.659	955.658	955.659	683.748	683.535	683.969	4	2	2	http://metlin.scripps.edu/metabo_list.php?mass_min=954.51&mass_max=954.81	1.36969e+07	1.81809e+07	4.67826e+06	2.52568e+06
1162	M707T794	2.57322	-4.45716	0.0713067	706.52	706.52	706.521	794.393	794.244	794.56	4	2	2	http://metlin.scripps.edu/metabo_list.php?mass_min=705.37&mass_max=705.67	1.8252e+08	2.08777e+08	9.94388e+07	5.26266e+07
1163	M361T283	4.33373	4.12588	0.0713228	361.056	361.05	361.058	282.876	282.252	283.191	3	1	2	http://metlin.scripps.edu/metabo_list.php?mass_min=359.91&mass_max=360.21	4.68308e+06	883120	1.32641e+07	1.08583e+07
1164	M361T480	17.4505	8.84055	0.0713409	361.153	361.153	361.154	479.955	479.847	480.063	2	0	2	http://metlin.scripps.edu/metabo_list.php?mass_min=360&mass_max=360.3	3.56384e+06	3.11894e+06	6.45227e+07	5.20954e+07
1165	M741T392	9.43997	-7.67634	0.0713597	741.276	741.275	741.276	392.148	392.002	392.391	4	2	2	http://metlin.scripps.edu/metabo_list.php?mass_min=740.13&mass_max=740.43	8.51885e+07	6.77211e+07	9.83608e+06	6.36201e+06
1166	M306T275	1.93281	6.18416	0.0714092	306.121	306.121	306.122	274.574	274.33	274.879	4	2	2	http://metlin.scripps.edu/metabo_list.php?mass_min=304.97&mass_max=305.27	1.19857e+08	1.08798e+08	2.37308e+08	2.04639e+08
1167	M422T333	4.31373	-6.75219	0.0715144	422.164	422.164	422.164	332.991	332.991	332.991	1	1	0	http://metlin.scripps.edu/metabo_list.php?mass_min=421.01&mass_max=421.31	4.3644e+06	5.43715e+06	1.28828e+06	983891
1168	M652T778	2.51575	-4.75892	0.0715884	652.411	652.411	652.411	778.452	778.391	778.53	4	2	2	http://metlin.scripps.edu/metabo_list.php?mass_min=651.26&mass_max=651.56	3.79428e+07	4.25535e+07	2.05428e+07	1.14541e+07
1169	M547T780	2.61037	-4.87046	0.0716652	547.332	547.332	547.332	779.729	779.384	779.829	4	2	2	http://metlin.scripps.edu/metabo_list.php?mass_min=546.18&mass_max=546.48	3.07779e+07	3.44107e+07	1.6194e+07	8.77901e+06
1170	M359T480	46.901	8.83679	0.071735	359.15	359.15	359.15	480.164	480.063	480.215	4	2	2	http://metlin.scripps.edu/metabo_list.php?mass_min=358&mass_max=358.3	4.49471e+07	4.61294e+07	2.37233e+09	1.89925e+09
1171	M890T381	6.18455	6.20453	0.0717404	890.307	890.278	890.33	381.258	371.3	391.091	4	2	2	http://metlin.scripps.edu/metabo_list.php?mass_min=889.16&mass_max=889.46	7.37071e+06	1.26813e+07	6.99521e+07	5.40604e+07
1172	M401T283	9.49375	8.62116	0.0717787	401.014	401.014	401.014	282.518	282.501	282.535	2	0	2	http://metlin.scripps.edu/metabo_list.php?mass_min=399.86&mass_max=400.16	126262	147203	1.4324e+06	1.1638e+06
1173	M664T371	3.79016	-7.08775	0.0717963	664.192	664.186	664.2	371.129	370.845	371.64	4	2	2	http://metlin.scripps.edu/metabo_list.php?mass_min=663.04&mass_max=663.34	1.14045e+07	1.396e+07	3.66609e+06	3.02609e+06
1174	M589T220	16.0547	-7.16731	0.0718112	589.299	589.299	589.299	220.219	220.091	220.347	2	2	0	http://metlin.scripps.edu/metabo_list.php?mass_min=588.15&mass_max=588.45	6.58071e+06	8.49769e+06	702435	236755
1175	M780T705	2.57037	-6.05536	0.0718572	779.555	779.555	779.555	704.738	704.671	704.86	4	2	2	http://metlin.scripps.edu/metabo_list.php?mass_min=778.4&mass_max=778.7	2.11789e+08	2.26325e+08	1.06097e+08	6.43515e+07
1176	M709T392	9.37566	-7.69025	0.0719844	709.252	709.25	709.254	392.336	392.26	392.391	4	2	2	http://metlin.scripps.edu/metabo_list.php?mass_min=708.1&mass_max=708.4	4.75863e+07	3.78396e+07	5.48811e+06	3.62335e+06
1177	M785T704	2.76897	-6.6563	0.0720168	784.509	784.509	784.51	704.092	704.029	704.2	4	2	2	http://metlin.scripps.edu/metabo_list.php?mass_min=783.36&mass_max=783.66	3.39603e+06	3.58189e+06	1.58173e+06	938313
1178	M722T877	2.85848	-3.53787	0.0721482	721.539	721.539	721.54	877.423	877.175	877.526	4	2	2	http://metlin.scripps.edu/metabo_list.php?mass_min=720.39&mass_max=720.69	1.33448e+07	1.75176e+07	7.31905e+06	3.47777e+06
1179	M946T713	3.58568	-4.22781	0.0721892	946.456	946.456	946.456	713.46	713.263	713.657	2	2	0	http://metlin.scripps.edu/metabo_list.php?mass_min=945.31&mass_max=945.61	3.30507e+06	2.77127e+06	1.29149e+06	403124
1180	M358T847	2.59611	-4.02965	0.0722197	358.264	358.264	358.265	846.882	846.783	846.979	4	2	2	http://metlin.scripps.edu/metabo_list.php?mass_min=357.11&mass_max=357.41	1.36366e+07	1.61109e+07	7.63168e+06	3.82684e+06
1181	M1104T515	8.00624	4.69252	0.0723457	1104.5	1104.5	1104.5	515.264	515.241	515.286	2	0	2	http://metlin.scripps.edu/metabo_list.php?mass_min=1103.35&mass_max=1103.65	103030	542333	3.01227e+06	2.15466e+06
1182	M663T371	4.11745	-7.838	0.0723499	663.181	663.181	663.183	371	370.957	371.157	4	2	2	http://metlin.scripps.edu/metabo_list.php?mass_min=662.03&mass_max=662.33	3.07789e+07	3.72553e+07	8.81978e+06	7.70361e+06
1183	M267T454	3.72655	5.29284	0.072434	267.159	267.159	267.159	453.668	453.553	453.784	2	0	2	http://metlin.scripps.edu/metabo_list.php?mass_min=266.01&mass_max=266.31	6.06045e+06	9.14395e+06	2.47301e+07	3.193e+07
1184	M409T715	1.62022	-4.1563	0.0724915	409.201	409.2	409.201	715.489	715.225	715.918	4	2	2	http://metlin.scripps.edu/metabo_list.php?mass_min=408.05&mass_max=408.35	3.35993e+08	3.70055e+08	2.45583e+08	1.90189e+08
1185	M427T283	7.05264	7.64257	0.0725353	427.014	427.014	427.014	282.876	282.876	282.876	1	0	1	http://metlin.scripps.edu/metabo_list.php?mass_min=425.86&mass_max=426.16	210848	284250	1.93846e+06	1.55329e+06
1186	M446T346	4.26149	-7.69843	0.0726283	446.143	446.143	446.143	345.577	345.577	345.577	1	1	0	http://metlin.scripps.edu/metabo_list.php?mass_min=444.99&mass_max=445.29	1.52445e+06	1.25289e+06	350838	300892
1187	M419T774	2.53756	-5.25777	0.0727141	418.801	418.801	418.801	774.278	774.231	774.381	4	2	2	http://metlin.scripps.edu/metabo_list.php?mass_min=417.65&mass_max=417.95	3.84601e+08	4.2134e+08	2.01454e+08	1.1615e+08
1188	M525T613	3.2873	-7.50973	0.072715	525.293	525.292	525.294	613.342	612.957	613.366	3	2	1	http://metlin.scripps.edu/metabo_list.php?mass_min=524.14&mass_max=524.44	1.11595e+07	1.33889e+07	3.95908e+06	3.50853e+06
1189	M1043T683	2.4202	-3.62426	0.0727228	1043.44	1043.44	1043.44	682.852	682.796	682.909	2	2	0	http://metlin.scripps.edu/metabo_list.php?mass_min=1042.29&mass_max=1042.59	1.00221e+07	1.29033e+07	5.90635e+06	3.56619e+06
1190	M821T774	2.75837	-5.45023	0.0727454	820.571	820.571	820.571	774.237	774.05	774.314	4	2	2	http://metlin.scripps.edu/metabo_list.php?mass_min=819.42&mass_max=819.72	8.04621e+06	8.78905e+06	3.96346e+06	2.13988e+06
1191	M357T847	2.54809	-4.21004	0.0727854	357.261	357.261	357.261	846.882	846.783	846.979	4	2	2	http://metlin.scripps.edu/metabo_list.php?mass_min=356.11&mass_max=356.41	7.08208e+07	8.21776e+07	3.94894e+07	2.0555e+07
1192	M781T705	2.59511	-6.08692	0.0728088	780.558	780.557	780.558	704.694	704.53	704.759	4	2	2	http://metlin.scripps.edu/metabo_list.php?mass_min=779.41&mass_max=779.71	5.67884e+07	6.05869e+07	2.82284e+07	1.7001e+07
1193	M844T392	5.69213	-5.25277	0.0729064	844.363	844.363	844.363	391.63	391.63	391.63	1	1	0	http://metlin.scripps.edu/metabo_list.php?mass_min=843.21&mass_max=843.51	4.87107e+06	3.64354e+06	1.01184e+06	484017
1194	M695T371	3.20736	-8.42195	0.072956	695.208	695.207	695.208	371.213	371.011	371.3	4	2	2	http://metlin.scripps.edu/metabo_list.php?mass_min=694.06&mass_max=694.36	2.22766e+07	2.62244e+07	7.73665e+06	7.38512e+06
1195	M351T444	3.75363	3.94315	0.0730062	351.177	351.177	351.178	444.436	444.348	444.523	2	0	2	http://metlin.scripps.edu/metabo_list.php?mass_min=350.03&mass_max=350.33	3.30625e+06	7.49567e+06	2.34097e+07	1.71367e+07
1196	M705T794	2.57113	-4.4563	0.0731411	704.515	704.515	704.516	794.393	794.244	794.56	4	2	2	http://metlin.scripps.edu/metabo_list.php?mass_min=703.37&mass_max=703.67	1.90024e+09	2.16787e+09	1.03584e+09	5.46394e+08
1197	M653T705	2.4737	-4.16531	0.0732056	653.405	653.401	653.408	704.694	704.2	705.403	4	2	2	http://metlin.scripps.edu/metabo_list.php?mass_min=652.26&mass_max=652.56	1.20238e+07	1.39503e+07	6.83827e+06	3.66185e+06
1198	M294T523	3.50008	5.49287	0.0732602	294.124	294.124	294.124	523.185	523.036	523.345	4	2	2	http://metlin.scripps.edu/metabo_list.php?mass_min=292.97&mass_max=293.27	1.35759e+07	1.90837e+07	6.40592e+07	5.02522e+07
1199	M264T316	2.15676	6.23493	0.0733896	264.167	264.166	264.168	315.773	315.661	315.885	2	0	2	http://metlin.scripps.edu/metabo_list.php?mass_min=263.02&mass_max=263.32	423645	474334	1.04772e+06	889013
1200	M314T682	2.35948	-3.8233	0.0734246	314.123	314.122	314.123	681.915	681.86	681.971	2	2	0	http://metlin.scripps.edu/metabo_list.php?mass_min=312.97&mass_max=313.27	9.19615e+06	1.17815e+07	5.35509e+06	3.53571e+06
1201	M758T276	22.685	-8.27666	0.0734288	758.148	758.144	758.152	276.272	275.972	276.572	2	2	0	http://metlin.scripps.edu/metabo_list.php?mass_min=757&mass_max=757.3	440477	554812	27880.8	15993.6
1202	M706T794	2.55352	-4.4419	0.0734689	705.517	705.517	705.518	794.393	794.244	794.56	4	2	2	http://metlin.scripps.edu/metabo_list.php?mass_min=704.37&mass_max=704.67	7.22545e+08	8.24206e+08	3.95799e+08	2.09934e+08
1203	M398T781	2.55598	-4.80982	0.073623	397.791	397.791	397.791	780.77	780.704	780.946	4	2	2	http://metlin.scripps.edu/metabo_list.php?mass_min=396.64&mass_max=396.94	4.11953e+07	4.60121e+07	2.2025e+07	1.2094e+07
1204	M742T480	99.9874	8.52395	0.0736382	742.361	742.361	742.361	479.798	479.749	479.847	2	0	2	http://metlin.scripps.edu/metabo_list.php?mass_min=741.21&mass_max=741.51	70795.7	261067	1.85156e+07	1.46665e+07
1205	M229T682	2.38092	-3.90694	0.073651	229.062	229.062	229.064	682.071	681.763	682.194	4	2	2	http://metlin.scripps.edu/metabo_list.php?mass_min=227.91&mass_max=228.21	1.38047e+07	1.76837e+07	7.91696e+06	5.30834e+06
1206	M383T633	2.20558	-7.98753	0.0737651	382.79	382.78	382.804	633.263	633.042	633.55	4	2	2	http://metlin.scripps.edu/metabo_list.php?mass_min=381.64&mass_max=381.94	1.57395e+06	1.60378e+06	828086	612683
1207	M209T740	1.09775	6.62085	0.0738659	209.154	209.153	209.154	739.677	739.612	739.759	4	2	2	http://metlin.scripps.edu/metabo_list.php?mass_min=208&mass_max=208.3	1.35057e+07	1.3613e+07	1.46919e+07	1.50776e+07
1208	M779T705	2.55837	-6.04515	0.0738669	778.552	778.552	778.552	704.738	704.671	704.86	4	2	2	http://metlin.scripps.edu/metabo_list.php?mass_min=777.4&mass_max=777.7	5.065e+08	5.40008e+08	2.54518e+08	1.54534e+08
1209	M553T263	3.28958	-4.19233	0.0740604	553.101	553.101	553.101	262.701	262.701	262.701	1	1	0	http://metlin.scripps.edu/metabo_list.php?mass_min=551.95&mass_max=552.25	1.183e+06	887362	402350	227022
1210	M298T431	1.63015	-3.88323	0.0741081	298.238	298.238	298.238	431.2	429.265	432.868	4	2	2	http://metlin.scripps.edu/metabo_list.php?mass_min=297.09&mass_max=297.39	4.91168e+07	5.79493e+07	3.58218e+07	2.98569e+07
1211	M384T285	2.52301	-5.28416	0.0741285	384.191	384.189	384.192	285.08	283.9	286.426	4	2	2	http://metlin.scripps.edu/metabo_list.php?mass_min=383.04&mass_max=383.34	1.60813e+08	1.98709e+08	7.91657e+07	6.33315e+07
1212	M402T705	2.41955	-6.51855	0.0741333	401.773	401.773	401.773	704.53	704.439	704.671	3	2	1	http://metlin.scripps.edu/metabo_list.php?mass_min=400.62&mass_max=400.92	3.10332e+06	3.26086e+06	1.59051e+06	1.0398e+06
1213	M391T324	6.15479	8.31343	0.074141	391.18	391.18	391.181	324.038	323.697	324.379	2	0	2	http://metlin.scripps.edu/metabo_list.php?mass_min=390.03&mass_max=390.33	866899	780912	5.58002e+06	4.56191e+06
1214	M721T878	2.87619	-3.51468	0.0743072	720.537	720.536	720.537	877.51	877.339	877.526	4	2	2	http://metlin.scripps.edu/metabo_list.php?mass_min=719.39&mass_max=719.69	7.15729e+07	9.48887e+07	3.90729e+07	1.88029e+07
1215	M245T464	2.61564	-4.22233	0.0743323	245.195	245.16	245.221	464.124	460.711	468.26	4	2	2	http://metlin.scripps.edu/metabo_list.php?mass_min=244.05&mass_max=244.35	6.62756e+06	8.54397e+06	3.45991e+06	2.34041e+06
1216	M663T801	2.5171	-4.19973	0.0744418	663.496	663.496	663.496	801.395	801.3	801.434	4	2	2	http://metlin.scripps.edu/metabo_list.php?mass_min=662.35&mass_max=662.65	3.35753e+07	3.88448e+07	1.88648e+07	9.90648e+06
1217	M708T794	2.54884	-4.33832	0.0744485	707.523	707.523	707.523	794.393	794.244	794.56	4	2	2	http://metlin.scripps.edu/metabo_list.php?mass_min=706.37&mass_max=706.67	3.34694e+07	3.83816e+07	1.84868e+07	9.7029e+06
1218	M375T788	2.59184	-4.82886	0.0744635	374.774	374.774	374.774	787.577	787.372	787.706	4	2	2	http://metlin.scripps.edu/metabo_list.php?mass_min=373.62&mass_max=373.92	8.13689e+07	9.07853e+07	4.30947e+07	2.3327e+07
1219	M441T768	2.50868	-5.79297	0.0745348	440.814	440.814	440.814	767.85	767.724	768.022	4	2	2	http://metlin.scripps.edu/metabo_list.php?mass_min=439.66&mass_max=439.96	2.60483e+08	2.79321e+08	1.33976e+08	8.11987e+07
1220	M393T870	2.92318	-3.50798	0.0746033	392.773	392.773	392.773	870.083	869.926	870.116	4	2	2	http://metlin.scripps.edu/metabo_list.php?mass_min=391.62&mass_max=391.92	9.7984e+06	1.3032e+07	5.30839e+06	2.50174e+06
1221	M367T787	2.67885	-4.90169	0.0747109	366.763	366.763	366.763	787.373	787.349	787.487	4	2	2	http://metlin.scripps.edu/metabo_list.php?mass_min=365.61&mass_max=365.91	1.07199e+07	1.19396e+07	5.54327e+06	2.91541e+06
1222	M739T710_1	2.54703	-6.10821	0.0747518	738.536	738.535	738.536	709.896	709.802	710.117	4	2	2	http://metlin.scripps.edu/metabo_list.php?mass_min=737.39&mass_max=737.69	3.90693e+06	4.15289e+06	1.96359e+06	1.20081e+06
1223	M725T368	4.93353	-7.40139	0.074859	725.297	725.297	725.309	368.488	362.806	369.39	3	2	1	http://metlin.scripps.edu/metabo_list.php?mass_min=724.15&mass_max=724.45	1.03742e+07	1.28287e+07	2.58764e+06	2.11548e+06
1224	M446T225	2.24269	-4.91626	0.0748755	446.192	446.192	446.192	224.824	224.782	224.865	2	2	0	http://metlin.scripps.edu/metabo_list.php?mass_min=445.04&mass_max=445.34	2.2257e+07	2.44613e+07	1.28066e+07	8.02468e+06
1225	M696T372	2.46584	-5.71061	0.0748864	696.217	696.212	696.227	371.714	370.988	372.526	4	2	2	http://metlin.scripps.edu/metabo_list.php?mass_min=695.07&mass_max=695.37	8.24901e+06	1.00381e+07	4.03325e+06	3.38294e+06
1226	M365T492	1.93807	-3.88335	0.0749275	365.164	365.162	365.166	491.956	490.37	493.543	2	2	0	http://metlin.scripps.edu/metabo_list.php?mass_min=364.01&mass_max=364.31	4.69832e+07	3.81545e+07	2.49082e+07	1.9021e+07
1227	M549T472	16.133	-8.31587	0.0749796	549.308	549.308	549.308	472.038	471.971	472.106	2	2	0	http://metlin.scripps.edu/metabo_list.php?mass_min=548.16&mass_max=548.46	5.7594e+06	7.22048e+06	449281	355274
1228	M837T469	1.83019	-4.57107	0.0752515	837.436	837.433	837.437	469.046	468.243	469.717	4	2	2	http://metlin.scripps.edu/metabo_list.php?mass_min=836.29&mass_max=836.59	5.27401e+06	4.41764e+06	2.86657e+06	2.42887e+06
1229	M971T755	3.21257	-6.05592	0.0753401	970.679	970.679	970.679	755.449	755.182	755.479	3	2	1	http://metlin.scripps.edu/metabo_list.php?mass_min=969.53&mass_max=969.83	3.80898e+06	4.08546e+06	1.65577e+06	801590
1230	M217T281	2.69264	-5.08734	0.0753979	217.158	217.157	217.159	281.461	281.345	281.576	2	2	0	http://metlin.scripps.edu/metabo_list.php?mass_min=216.01&mass_max=216.31	5.19272e+07	6.52028e+07	2.46324e+07	1.88677e+07
1231	M720T878	2.83905	-3.48207	0.0754623	719.534	719.534	719.534	877.51	877.339	877.526	4	2	2	http://metlin.scripps.edu/metabo_list.php?mass_min=718.38&mass_max=718.68	2.80571e+08	3.72102e+08	1.54833e+08	7.50579e+07
1232	M459T783	2.56333	-4.87586	0.0755501	459.28	459.28	459.28	782.734	782.665	782.867	4	2	2	http://metlin.scripps.edu/metabo_list.php?mass_min=458.13&mass_max=458.43	3.34765e+07	3.7184e+07	1.77946e+07	9.77139e+06
1233	M657T497	6.49552	7.04303	0.0755813	657.367	657.367	657.368	496.503	496.377	496.712	3	1	2	http://metlin.scripps.edu/metabo_list.php?mass_min=656.22&mass_max=656.52	477474	3.52864e+06	1.26712e+07	1.33506e+07
1234	M719T878	2.8519	-3.48558	0.0756264	718.531	718.531	718.531	877.51	877.339	877.526	4	2	2	http://metlin.scripps.edu/metabo_list.php?mass_min=717.38&mass_max=717.68	7.12913e+08	9.47065e+08	3.92035e+08	1.90024e+08
1235	M573T392	7.55012	7.93894	0.075629	573.094	573.094	573.094	392.019	392.002	392.036	2	0	2	http://metlin.scripps.edu/metabo_list.php?mass_min=571.94&mass_max=572.24	489600	402579	3.7335e+06	3.00256e+06
1236	M334T721	2.49427	-3.47567	0.0756319	334.2	334.2	334.201	721.213	720.932	721.495	2	2	0	http://metlin.scripps.edu/metabo_list.php?mass_min=333.05&mass_max=333.35	2.40396e+06	3.01904e+06	1.43902e+06	735168
1237	M662T801	2.5412	-4.25366	0.0756377	662.494	662.494	662.494	801.395	801.3	801.434	4	2	2	http://metlin.scripps.edu/metabo_list.php?mass_min=661.34&mass_max=661.64	1.94885e+08	2.24373e+08	1.08491e+08	5.64926e+07
1238	M241T679	1.81008	-3.72158	0.0756917	241.132	241.125	241.141	679.183	677.543	680.409	4	2	2	http://metlin.scripps.edu/metabo_list.php?mass_min=239.98&mass_max=240.28	1.75472e+07	2.13499e+07	1.21065e+07	9.38264e+06
1239	M405T781	2.49573	-4.83222	0.0758074	405.301	405.301	405.301	780.99	780.802	781.057	4	2	2	http://metlin.scripps.edu/metabo_list.php?mass_min=404.15&mass_max=404.45	8.08994e+08	8.98546e+08	4.38048e+08	2.46136e+08
1240	M314T207	1.69567	3.50245	0.0758193	314.232	314.232	314.232	206.93	206.893	206.967	2	0	2	http://metlin.scripps.edu/metabo_list.php?mass_min=313.08&mass_max=313.38	5.80999e+06	7.89301e+06	1.24938e+07	1.0742e+07
1241	M740T480	68.1367	8.22425	0.0758691	740.354	740.354	740.357	479.749	479.265	479.847	3	1	2	http://metlin.scripps.edu/metabo_list.php?mass_min=739.2&mass_max=739.5	909653	2.81828e+06	1.42191e+08	1.11818e+08
1242	M370T722	1.83932	-4.6781	0.0759105	369.899	369.899	369.899	721.882	721.882	721.882	1	1	0	http://metlin.scripps.edu/metabo_list.php?mass_min=368.75&mass_max=369.05	377941	450535	242967	207458
1243	M514T679	2.42722	-4.17805	0.0759264	514.287	514.284	514.289	679.357	679.153	679.545	4	2	2	http://metlin.scripps.edu/metabo_list.php?mass_min=513.14&mass_max=513.44	1.56877e+07	2.00348e+07	8.62144e+06	6.09601e+06
1244	M521T533	2.10854	-4.58751	0.0759638	521.209	521.208	521.21	532.636	532.431	532.841	2	2	0	http://metlin.scripps.edu/metabo_list.php?mass_min=520.06&mass_max=520.36	1.241e+06	1.52405e+06	584448	726912
1245	M399T467	6.20989	6.3097	0.075982	399.296	399.295	399.296	467.436	467.276	467.597	2	0	2	http://metlin.scripps.edu/metabo_list.php?mass_min=398.15&mass_max=398.45	432016	693403	3.94023e+06	3.04849e+06
1246	M475T493	4.08839	-6.02722	0.0760075	475.207	475.105	475.23	492.884	480.476	495.149	3	2	1	http://metlin.scripps.edu/metabo_list.php?mass_min=474.06&mass_max=474.36	4.88989e+06	6.21468e+06	1.14479e+06	1.57133e+06
1247	M464T689	2.24807	-6.48909	0.076072	464.333	464.333	464.333	689.25	689.187	689.469	4	2	2	http://metlin.scripps.edu/metabo_list.php?mass_min=463.18&mass_max=463.48	4.89906e+08	5.12598e+08	2.64326e+08	1.81613e+08
1248	M452T768	2.4776	-5.81496	0.0760946	451.804	451.804	451.804	768.127	768.127	768.127	1	1	0	http://metlin.scripps.edu/metabo_list.php?mass_min=450.65&mass_max=450.95	3.60393e+07	3.85262e+07	1.86638e+07	1.14321e+07
1249	M458T392	3.94632	3.57516	0.0761203	458.175	458.129	458.194	392.305	391.685	393.655	4	2	2	http://metlin.scripps.edu/metabo_list.php?mass_min=457.02&mass_max=457.32	5.15988e+06	1.09785e+06	1.39361e+07	1.07589e+07
1250	M428T715	1.73987	-4.4002	0.0761274	428.215	428.215	428.215	714.872	714.565	714.967	4	2	2	http://metlin.scripps.edu/metabo_list.php?mass_min=427.06&mass_max=427.36	2.9108e+08	3.45315e+08	1.97387e+08	1.68385e+08
1251	M911T689	2.6651	-6.90894	0.0761475	910.63	910.63	910.631	689.218	689.145	689.251	4	2	2	http://metlin.scripps.edu/metabo_list.php?mass_min=909.48&mass_max=909.78	3.10149e+07	3.23059e+07	1.4669e+07	9.09027e+06
1252	M928T393	26.9086	8.31722	0.0761725	928.319	928.319	928.319	393.13	392.958	393.303	2	0	2	http://metlin.scripps.edu/metabo_list.php?mass_min=927.17&mass_max=927.47	961132	938760	2.85209e+07	2.26026e+07
1253	M391T659	2.28014	-6.75627	0.0762175	391.199	391.198	391.199	658.776	658.541	659.003	4	2	2	http://metlin.scripps.edu/metabo_list.php?mass_min=390.05&mass_max=390.35	1.95355e+07	2.29647e+07	9.74195e+06	8.89731e+06
1254	M1103T753	5.016	-4.32562	0.0762492	1102.67	1102.67	1102.67	753.262	753.252	753.271	2	2	0	http://metlin.scripps.edu/metabo_list.php?mass_min=1101.52&mass_max=1101.82	661056	917247	227517	87136.5
1255	M724T877	2.81097	-3.46235	0.0763738	724.488	724.486	724.489	877.268	877.175	877.507	4	2	2	http://metlin.scripps.edu/metabo_list.php?mass_min=723.34&mass_max=723.64	6.59347e+06	8.75086e+06	3.66447e+06	1.79426e+06
1256	M431T751	2.59913	-4.35155	0.076376	431.297	431.297	431.297	751.377	751.365	751.548	4	2	2	http://metlin.scripps.edu/metabo_list.php?mass_min=430.15&mass_max=430.45	7.83922e+07	8.97185e+07	4.27881e+07	2.18914e+07
1257	M390T282	5.61589	5.93435	0.0764024	390.015	390.005	390.034	282.437	281.913	282.535	4	2	2	http://metlin.scripps.edu/metabo_list.php?mass_min=388.86&mass_max=389.16	3.55903e+06	5.84489e+06	2.98798e+07	2.29316e+07
1258	M394T391	1.90692	-3.49963	0.0764141	394.176	394.176	394.176	390.756	390.69	390.819	4	2	2	http://metlin.scripps.edu/metabo_list.php?mass_min=393.03&mass_max=393.33	3.93766e+09	4.85748e+09	2.68773e+09	1.9245e+09
1259	M342T264	1.91368	4.19353	0.0765867	342.143	342.14	342.145	264.061	263.543	264.712	4	2	2	http://metlin.scripps.edu/metabo_list.php?mass_min=340.99&mass_max=341.29	6.11126e+06	8.96152e+06	1.52379e+07	1.36066e+07
1260	M490T720	1.30357	-3.48901	0.0767142	490.279	490.279	490.279	719.788	718.756	720.418	4	2	2	http://metlin.scripps.edu/metabo_list.php?mass_min=489.13&mass_max=489.43	1.6539e+07	1.51847e+07	1.29818e+07	1.13541e+07
1261	M390T659	2.29006	-6.78111	0.0767654	390.196	390.196	390.196	658.654	658.46	659.003	4	2	2	http://metlin.scripps.edu/metabo_list.php?mass_min=389.05&mass_max=389.35	1.36354e+08	1.60323e+08	6.76429e+07	6.1907e+07
1262	M382T870	2.89412	-3.46655	0.0767986	381.782	381.782	381.782	869.85	869.73	870.116	4	2	2	http://metlin.scripps.edu/metabo_list.php?mass_min=380.63&mass_max=380.93	2.98909e+07	3.99312e+07	1.63336e+07	7.79192e+06
1263	M644T801	2.62291	-4.24054	0.0768055	644.466	644.466	644.466	801.209	801.095	801.372	4	2	2	http://metlin.scripps.edu/metabo_list.php?mass_min=643.32&mass_max=643.62	4.8939e+07	5.64608e+07	2.67992e+07	1.33852e+07
1264	M434T694	2.27577	-6.27192	0.0768528	433.806	433.806	433.806	694.276	694.211	694.442	4	2	2	http://metlin.scripps.edu/metabo_list.php?mass_min=432.66&mass_max=432.96	1.97255e+08	2.07347e+08	1.06257e+08	7.153e+07
1265	M590T687	2.5533	-3.74085	0.0768556	590.287	590.206	590.369	686.74	676.868	697.822	4	2	2	http://metlin.scripps.edu/metabo_list.php?mass_min=589.14&mass_max=589.44	2.54045e+07	2.10885e+07	1.22085e+07	6.00052e+06
1266	M653T778	2.48155	-4.83322	0.0768569	653.415	653.414	653.415	778.297	778.182	778.402	4	2	2	http://metlin.scripps.edu/metabo_list.php?mass_min=652.26&mass_max=652.56	1.1853e+07	1.31418e+07	6.43897e+06	3.63333e+06
1267	M473T951	1.02534	4.3668	0.0768979	473.322	473.322	473.322	951.131	951.033	951.229	2	0	2	http://metlin.scripps.edu/metabo_list.php?mass_min=472.17&mass_max=472.47	3.94915e+06	3.90895e+06	4.03938e+06	4.01786e+06
1268	M395T391	1.90943	-3.49853	0.0770106	395.178	395.178	395.178	390.756	390.69	390.819	4	2	2	http://metlin.scripps.edu/metabo_list.php?mass_min=394.03&mass_max=394.33	9.91264e+08	1.22478e+09	6.75796e+08	4.84781e+08
1269	M398T842	2.4524	-4.11127	0.0770442	398.337	398.337	398.337	841.828	841.583	841.847	3	2	1	http://metlin.scripps.edu/metabo_list.php?mass_min=397.19&mass_max=397.49	4.46599e+07	5.16851e+07	2.56277e+07	1.36584e+07
1270	M548T503	4.64037	-6.17869	0.0770594	548.2	548.199	548.2	502.653	502.361	502.784	4	2	2	http://metlin.scripps.edu/metabo_list.php?mass_min=547.05&mass_max=547.35	4.922e+07	3.8543e+07	1.10512e+07	7.86175e+06
1271	M766T870	2.9052	-3.52889	0.0771034	765.566	765.566	765.566	869.78	869.73	869.926	4	2	2	http://metlin.scripps.edu/metabo_list.php?mass_min=764.42&mass_max=764.72	1.39055e+07	1.86409e+07	7.4827e+06	3.72013e+06
1272	M449T768	2.44027	-5.57325	0.0771063	449.328	449.328	449.328	767.85	767.724	768.022	4	2	2	http://metlin.scripps.edu/metabo_list.php?mass_min=448.18&mass_max=448.48	1.02074e+09	1.09744e+09	5.39405e+08	3.28606e+08
1273	M660T801	2.54151	-4.28951	0.0771483	660.489	660.489	660.49	801.395	801.3	801.434	4	2	2	http://metlin.scripps.edu/metabo_list.php?mass_min=659.34&mass_max=659.64	2.27699e+09	2.60914e+09	1.26417e+09	6.58358e+08
1274	M613T892	2.78438	-3.41081	0.0771827	613.453	613.452	613.453	892.366	892.347	892.522	4	2	2	http://metlin.scripps.edu/metabo_list.php?mass_min=612.3&mass_max=612.6	3.45186e+07	4.56559e+07	1.94687e+07	9.32566e+06
1275	M749T370	4.42277	-5.89299	0.0772031	749.275	749.271	749.278	370.136	370.052	370.22	2	2	0	http://metlin.scripps.edu/metabo_list.php?mass_min=748.12&mass_max=748.42	1.22387e+06	1.57288e+06	373387	258967
1276	M490T830	2.54597	-4.24452	0.0772118	490.342	490.342	490.343	829.519	829.417	829.714	4	2	2	http://metlin.scripps.edu/metabo_list.php?mass_min=489.19&mass_max=489.49	1.36981e+07	1.57474e+07	7.62296e+06	3.94257e+06
1277	M381T842	2.46526	-3.94582	0.0773001	381.311	381.311	381.311	841.865	841.828	841.908	4	2	2	http://metlin.scripps.edu/metabo_list.php?mass_min=380.16&mass_max=380.46	2.00622e+07	2.35478e+07	1.16289e+07	6.06092e+06
1278	M223T280	1.3868	3.51678	0.0773012	223.022	223.016	223.029	279.929	279.39	280.468	2	0	2	http://metlin.scripps.edu/metabo_list.php?mass_min=221.87&mass_max=222.17	1.25904e+06	1.44468e+06	1.99091e+06	1.75861e+06
1279	M222T512	2.21035	-8.15253	0.0773684	222.14	222.129	222.151	512.025	502.784	521.123	4	2	2	http://metlin.scripps.edu/metabo_list.php?mass_min=220.99&mass_max=221.29	1.04692e+07	9.15201e+06	4.46051e+06	4.41646e+06
1280	M804T489	2.60238	-5.3439	0.0773714	804.34	804.34	804.34	488.526	488.526	488.526	1	1	0	http://metlin.scripps.edu/metabo_list.php?mass_min=803.19&mass_max=803.49	2.64521e+06	2.13218e+06	1.01765e+06	818128
1281	M230T480	16.6699	7.87319	0.0774438	230.093	230.093	230.093	480.269	480.161	480.378	2	0	2	http://metlin.scripps.edu/metabo_list.php?mass_min=228.94&mass_max=229.24	1.67308e+06	2.5037e+06	3.89488e+07	3.06775e+07
1282	M794T452	3.80432	3.56084	0.0774849	794.395	794.395	794.395	451.973	451.864	452.081	2	0	2	http://metlin.scripps.edu/metabo_list.php?mass_min=793.25&mass_max=793.55	5.37096e+06	1.52869e+07	4.57435e+07	3.28457e+07
1283	M313T536	2.26174	5.29459	0.077495	313.242	313.241	313.243	535.886	535.808	535.964	2	0	2	http://metlin.scripps.edu/metabo_list.php?mass_min=312.09&mass_max=312.39	666055	1.04554e+06	1.86082e+06	2.01037e+06
1284	M217T492	3.248	-5.24617	0.0775677	217.159	217.159	217.159	492.266	492.253	492.278	2	2	0	http://metlin.scripps.edu/metabo_list.php?mass_min=216.01&mass_max=216.31	4.37201e+07	5.59281e+07	1.77788e+07	1.2901e+07
1285	M215T715	1.71414	-4.22651	0.0776313	215.143	215.143	215.143	714.858	714.598	714.967	4	2	2	http://metlin.scripps.edu/metabo_list.php?mass_min=213.99&mass_max=214.29	7.96864e+07	9.47017e+07	5.50518e+07	4.66834e+07
1286	M346T164	3.83611	3.37853	0.0776723	346.258	346.257	346.258	164.452	164.127	165.08	3	1	2	http://metlin.scripps.edu/metabo_list.php?mass_min=345.11&mass_max=345.41	3.25347e+06	1.23741e+07	3.46893e+07	2.526e+07
1287	M436T263	2.58555	-6.26992	0.0777971	436.165	436.165	436.165	262.701	262.701	262.701	1	1	0	http://metlin.scripps.edu/metabo_list.php?mass_min=435.01&mass_max=435.31	6.53428e+06	7.8916e+06	2.98235e+06	2.59708e+06
1288	M312T453	5.37226	7.65862	0.0778174	312.215	312.213	312.217	452.989	452.536	453.441	2	0	2	http://metlin.scripps.edu/metabo_list.php?mass_min=311.06&mass_max=311.36	3.74933e+06	4.33493e+06	1.94264e+07	2.40044e+07
1289	M712T715	4.35066	-3.48033	0.0778837	712.433	712.433	712.433	715.225	715.225	715.225	1	1	0	http://metlin.scripps.edu/metabo_list.php?mass_min=711.28&mass_max=711.58	1.29695e+06	1.83419e+06	578623	141070
1290	M553T671	2.25762	-7.36138	0.0779407	553.384	553.379	553.388	670.513	669.888	671.169	4	2	2	http://metlin.scripps.edu/metabo_list.php?mass_min=552.23&mass_max=552.53	6.14067e+06	5.9912e+06	3.13977e+06	2.23397e+06
1291	M1061T683	1.68658	-3.36885	0.0779628	1061.43	1061.43	1061.43	682.965	682.707	683.222	4	2	2	http://metlin.scripps.edu/metabo_list.php?mass_min=1060.28&mass_max=1060.58	3.28489e+07	3.89492e+07	2.43697e+07	1.82005e+07
1292	M661T801	2.53555	-4.28372	0.0779889	661.491	661.491	661.492	801.395	801.3	801.434	4	2	2	http://metlin.scripps.edu/metabo_list.php?mass_min=660.34&mass_max=660.64	8.14983e+08	9.32927e+08	4.53253e+08	2.36107e+08
1293	M236T656	5.72525	7.40897	0.0780659	236.169	236.168	236.169	656.211	656.177	656.245	2	0	2	http://metlin.scripps.edu/metabo_list.php?mass_min=235.02&mass_max=235.32	3.4547e+06	4.21739e+06	2.4379e+07	1.95457e+07
1294	M671T325	4.19794	-5.81034	0.0780691	671.316	671.316	671.316	324.862	324.862	324.862	1	1	0	http://metlin.scripps.edu/metabo_list.php?mass_min=670.17&mass_max=670.47	2.90968e+06	3.73702e+06	928520	654804
1295	M927T393	30.9808	7.9433	0.0780772	927.316	927.316	927.316	393.13	392.958	393.303	2	0	2	http://metlin.scripps.edu/metabo_list.php?mass_min=926.17&mass_max=926.47	1.96678e+06	1.10607e+06	5.33826e+07	4.18166e+07
1296	M399T283	6.14137	8.09815	0.0781151	399.02	399.019	399.02	282.848	282.252	282.876	3	1	2	http://metlin.scripps.edu/metabo_list.php?mass_min=397.87&mass_max=398.17	1.00409e+06	980812	6.72498e+06	5.46502e+06
1297	M443T694	2.26373	-6.03968	0.0781733	443.321	443.321	443.321	694.276	694.211	694.442	4	2	2	http://metlin.scripps.edu/metabo_list.php?mass_min=442.17&mass_max=442.47	9.19591e+07	9.70616e+07	5.01046e+07	3.3395e+07
1298	M521T862	2.03508	-3.60556	0.0781808	521.33	521.319	521.337	862.148	861.621	862.349	4	2	2	http://metlin.scripps.edu/metabo_list.php?mass_min=520.18&mass_max=520.48	2.87857e+06	3.61649e+06	1.86732e+06	1.32424e+06
1299	M322T275	1.70019	5.76138	0.0781811	322.095	322.095	322.095	275.419	275.419	275.419	1	0	1	http://metlin.scripps.edu/metabo_list.php?mass_min=320.95&mass_max=321.25	4.21775e+06	3.90383e+06	7.37203e+06	6.43624e+06
1300	M386T788	2.51561	-4.6085	0.0781874	385.765	385.765	385.765	787.577	787.374	787.696	4	2	2	http://metlin.scripps.edu/metabo_list.php?mass_min=384.62&mass_max=384.92	2.30589e+07	2.58465e+07	1.25973e+07	6.84348e+06
1301	M468T829	2.51364	-3.98286	0.0782579	468.361	468.361	468.362	829.402	829.28	829.439	4	2	2	http://metlin.scripps.edu/metabo_list.php?mass_min=467.21&mass_max=467.51	6.40224e+07	7.49364e+07	3.66169e+07	1.86649e+07
1302	M425T694	2.30745	-6.12415	0.0782618	425.293	425.292	425.293	694.276	694.211	694.442	4	2	2	http://metlin.scripps.edu/metabo_list.php?mass_min=424.14&mass_max=424.44	3.15532e+07	3.32538e+07	1.69179e+07	1.11681e+07
1303	M656T497	5.22207	7.41983	0.0782705	656.362	656.356	656.365	496.765	496.692	497.117	4	2	2	http://metlin.scripps.edu/metabo_list.php?mass_min=655.21&mass_max=655.51	2.66969e+06	9.53147e+06	3.1329e+07	3.23863e+07
1304	M450T768	2.45167	-5.46494	0.0783056	450.329	450.329	450.329	767.766	767.696	767.892	4	2	2	http://metlin.scripps.edu/metabo_list.php?mass_min=449.18&mass_max=449.48	1.46269e+08	1.5765e+08	7.7432e+07	4.65322e+07
1305	M622T808	2.57916	-4.23482	0.0783203	622.42	622.42	622.42	808.409	808.325	808.565	4	2	2	http://metlin.scripps.edu/metabo_list.php?mass_min=621.27&mass_max=621.57	1.41994e+07	1.63277e+07	7.85134e+06	3.98474e+06
1306	M673T716	2.47816	-4.83836	0.0783735	673.473	673.472	673.473	715.806	715.6	715.855	4	2	2	http://metlin.scripps.edu/metabo_list.php?mass_min=672.32&mass_max=672.62	1.13173e+08	1.25198e+08	6.15011e+07	3.46876e+07
1307	M512T683	2.08625	-4.18355	0.0784093	512.238	512.238	512.239	682.751	682.596	682.82	4	2	2	http://metlin.scripps.edu/metabo_list.php?mass_min=511.09&mass_max=511.39	1.47268e+08	1.83141e+08	8.92384e+07	6.91367e+07
1308	M529T744	2.74659	-7.90072	0.0784107	528.866	528.866	528.866	744.19	744.009	744.41	4	2	2	http://metlin.scripps.edu/metabo_list.php?mass_min=527.72&mass_max=528.02	1.93396e+07	1.95782e+07	8.6464e+06	5.52309e+06
1309	M696T771	2.4921	-5.02233	0.0784212	696.437	696.437	696.438	771.338	771.064	771.438	4	2	2	http://metlin.scripps.edu/metabo_list.php?mass_min=695.29&mass_max=695.59	1.48303e+07	1.62741e+07	7.94831e+06	4.53286e+06
1310	M723T877	2.82592	-3.42343	0.078464	723.486	723.485	723.486	877.186	877.174	877.339	4	2	2	http://metlin.scripps.edu/metabo_list.php?mass_min=722.34&mass_max=722.64	1.68897e+07	2.25586e+07	9.39309e+06	4.56635e+06
1311	M269T490	1.6148	-3.36592	0.0784881	269.134	269.129	269.137	489.52	488.498	490.999	4	2	2	http://metlin.scripps.edu/metabo_list.php?mass_min=267.98&mass_max=268.28	2.67451e+07	2.26712e+07	1.72146e+07	1.33874e+07
1312	M313T849	1.44275	-4.05174	0.0785452	313.19	313.175	313.193	848.538	848.258	873.803	3	2	1	http://metlin.scripps.edu/metabo_list.php?mass_min=312.04&mass_max=312.34	6.49195e+07	7.01077e+07	5.12018e+07	4.23885e+07
1313	M681T541	1.44429	-3.44809	0.0785831	681.307	681.306	681.308	541.44	541.341	541.5	4	2	2	http://metlin.scripps.edu/metabo_list.php?mass_min=680.16&mass_max=680.46	2.25388e+06	2.5254e+06	1.81892e+06	1.49016e+06
1314	M351T672	2.54992	-5.4045	0.0785856	351.274	351.274	351.274	671.69	671.565	671.833	4	2	2	http://metlin.scripps.edu/metabo_list.php?mass_min=350.12&mass_max=350.42	4.12246e+06	4.46028e+06	2.13506e+06	1.23083e+06
1315	M263T412	4.18331	-6.0908	0.0787983	263.187	263.187	263.187	412.184	412.184	412.184	1	1	0	http://metlin.scripps.edu/metabo_list.php?mass_min=262.04&mass_max=262.34	3.73633e+06	2.93679e+06	915700	679477
1316	M759T276	33.6049	-8.02368	0.0788118	759.151	759.141	759.16	276.11	275.972	276.248	2	2	0	http://metlin.scripps.edu/metabo_list.php?mass_min=758&mass_max=758.3	738724	941909	27070.7	22940.8
1317	M243T682	2.24649	-3.54689	0.0788956	243.124	243.121	243.126	682.384	682.284	682.484	2	2	0	http://metlin.scripps.edu/metabo_list.php?mass_min=241.97&mass_max=242.27	2.34712e+06	3.01657e+06	1.44672e+06	940866
1318	M308T331	2.69937	3.53291	0.0788962	308.184	308.184	308.184	330.698	330.686	330.711	2	0	2	http://metlin.scripps.edu/metabo_list.php?mass_min=307.03&mass_max=307.33	2.20949e+06	4.03056e+06	9.61511e+06	7.22912e+06
1319	M503T705	2.37009	-5.36933	0.0789431	503.306	503.305	503.306	705.017	704.86	705.082	4	2	2	http://metlin.scripps.edu/metabo_list.php?mass_min=502.16&mass_max=502.46	3.69332e+07	3.98384e+07	2.00649e+07	1.23269e+07
1320	M740T311	3.63569	3.40014	0.0789686	740.324	740.322	740.325	311.313	311.059	311.79	4	2	2	http://metlin.scripps.edu/metabo_list.php?mass_min=739.17&mass_max=739.47	2.54499e+06	7.7682e+06	2.17739e+07	1.57216e+07
1321	M347T164	4.5948	3.34644	0.078992	347.262	347.262	347.262	164.452	164.127	164.723	3	1	2	http://metlin.scripps.edu/metabo_list.php?mass_min=346.11&mass_max=346.41	289286	2.24759e+06	6.77578e+06	4.88065e+06
1322	M678T885	2.80109	-3.41518	0.0790322	677.513	677.513	677.513	884.834	884.63	884.873	4	2	2	http://metlin.scripps.edu/metabo_list.php?mass_min=676.36&mass_max=676.66	1.36899e+07	1.82875e+07	7.65159e+06	3.76447e+06
1323	M337T847	2.4249	-4.0313	0.0791398	337.284	337.281	337.285	847.042	846.942	847.15	4	2	2	http://metlin.scripps.edu/metabo_list.php?mass_min=336.13&mass_max=336.43	9.70827e+06	1.12588e+07	5.64013e+06	3.00645e+06
1324	M782T705	2.55328	-5.96268	0.0791524	781.56	781.56	781.56	704.694	704.53	704.759	4	2	2	http://metlin.scripps.edu/metabo_list.php?mass_min=780.41&mass_max=780.71	1.13121e+07	1.20098e+07	5.70446e+06	3.42962e+06
1325	M428T680	3.05404	-4.16147	0.0792344	428.181	428.181	428.181	679.725	679.668	679.782	2	2	0	http://metlin.scripps.edu/metabo_list.php?mass_min=427.03&mass_max=427.33	1.09442e+08	1.45396e+08	5.17663e+07	3.16764e+07
1326	M368T357	4.32388	3.33911	0.0792484	368.234	368.199	368.238	356.723	356.452	363.458	3	1	2	http://metlin.scripps.edu/metabo_list.php?mass_min=367.08&mass_max=367.38	8.97271e+06	4.98914e+07	1.48231e+08	1.0629e+08
1327	M543T715	1.65462	-4.67342	0.0793182	543.19	543.19	543.19	715.343	715.225	715.461	2	2	0	http://metlin.scripps.edu/metabo_list.php?mass_min=542.04&mass_max=542.34	1.36599e+07	1.46743e+07	9.64896e+06	7.47533e+06
1328	M809T862	2.97958	-3.53681	0.0793436	808.59	808.59	808.59	862.476	862.349	862.627	4	2	2	http://metlin.scripps.edu/metabo_list.php?mass_min=807.44&mass_max=807.74	2.63188e+07	3.56037e+07	1.38945e+07	6.88778e+06
1329	M516T409	1.71242	-4.15324	0.0794392	516.229	516.229	516.229	409.413	409.413	409.413	1	1	0	http://metlin.scripps.edu/metabo_list.php?mass_min=515.08&mass_max=515.38	3.93074e+06	4.33471e+06	2.77474e+06	2.05202e+06
1330	M209T573	2.04496	4.99795	0.0794511	209.043	209.037	209.047	572.772	570.568	572.828	3	1	2	http://metlin.scripps.edu/metabo_list.php?mass_min=207.89&mass_max=208.19	2.0964e+06	1.78283e+06	4.34042e+06	3.59243e+06
1331	M234T558	4.07356	-7.87582	0.0794848	234.111	234.111	234.111	558.131	558.113	558.149	2	2	0	http://metlin.scripps.edu/metabo_list.php?mass_min=232.96&mass_max=233.26	4.32843e+06	3.57265e+06	948926	990671
1332	M763T705	2.22759	-5.64422	0.0795563	762.528	762.528	762.528	704.876	704.53	705.043	4	2	2	http://metlin.scripps.edu/metabo_list.php?mass_min=761.38&mass_max=761.68	2.00037e+07	2.12993e+07	1.11802e+07	7.36131e+06
1333	M442T694	2.24495	-6.05856	0.07958	442.32	442.32	442.32	694.391	694.211	694.542	4	2	2	http://metlin.scripps.edu/metabo_list.php?mass_min=441.17&mass_max=441.47	6.63909e+08	6.9902e+08	3.63409e+08	2.43699e+08
1334	M579T815	2.58943	-4.16251	0.0796411	579.399	579.398	579.4	815.395	815.378	815.462	3	2	1	http://metlin.scripps.edu/metabo_list.php?mass_min=578.25&mass_max=578.55	2.76367e+06	3.19e+06	1.53335e+06	765866
1335	M376T787	2.7344	-5.36595	0.0796963	375.778	375.778	375.778	787.431	787.372	787.666	4	2	2	http://metlin.scripps.edu/metabo_list.php?mass_min=374.63&mass_max=374.93	8.4567e+06	9.18172e+06	4.2027e+06	2.24785e+06
1336	M202T707	1.96987	3.73815	0.0797175	202.168	202.167	202.169	707.498	705.958	709.479	4	2	2	http://metlin.scripps.edu/metabo_list.php?mass_min=201.02&mass_max=201.32	3.18737e+06	4.94293e+06	8.59255e+06	7.42307e+06
1337	M467T829	2.52363	-4.08984	0.0797679	467.358	467.358	467.358	829.428	829.388	829.6	4	2	2	http://metlin.scripps.edu/metabo_list.php?mass_min=466.21&mass_max=466.51	2.45796e+08	2.84582e+08	1.39089e+08	7.10762e+07
1338	M753T788_1	2.53294	-4.51627	0.0797973	752.552	752.552	752.553	787.592	787.349	787.706	4	2	2	http://metlin.scripps.edu/metabo_list.php?mass_min=751.4&mass_max=751.7	5.09501e+06	5.73186e+06	2.78902e+06	1.48541e+06
1339	M283T316	4.55869	3.40146	0.0798052	283.189	283.179	283.19	315.663	312.702	315.885	4	2	2	http://metlin.scripps.edu/metabo_list.php?mass_min=282.04&mass_max=282.34	2.08098e+07	1.0648e+08	3.41118e+08	2.39158e+08
1340	M379T842	2.4549	-4.01259	0.0798593	379.305	379.305	379.306	841.865	841.828	841.908	4	2	2	http://metlin.scripps.edu/metabo_list.php?mass_min=378.16&mass_max=378.46	6.51494e+08	7.56856e+08	3.76521e+08	1.97169e+08
1341	M454T524	4.63291	-5.2287	0.0798681	454.278	454.278	454.278	524.028	524.013	524.042	2	2	0	http://metlin.scripps.edu/metabo_list.php?mass_min=453.13&mass_max=453.43	2.15743e+07	2.85916e+07	6.77055e+06	4.05762e+06
1342	M494T756	2.46027	-6.68181	0.0800248	494.356	494.355	494.356	755.779	755.697	755.813	4	2	2	http://metlin.scripps.edu/metabo_list.php?mass_min=493.21&mass_max=493.51	9.31963e+07	9.68637e+07	4.68658e+07	3.0386e+07
1343	M540T744	2.72185	-7.80354	0.0800934	539.857	539.857	539.857	744.2	744.009	744.39	4	2	2	http://metlin.scripps.edu/metabo_list.php?mass_min=538.71&mass_max=539.01	5.319e+06	5.36992e+06	2.39605e+06	1.53103e+06
1344	M864T768	2.71562	-6.24874	0.0801028	863.594	863.594	863.594	767.892	767.892	767.892	1	1	0	http://metlin.scripps.edu/metabo_list.php?mass_min=862.44&mass_max=862.74	8.05248e+06	8.48675e+06	3.85259e+06	2.23782e+06
1345	M1144T481	19.6044	5.74184	0.0801081	1143.53	1143.53	1143.53	481.323	481.323	481.323	1	0	1	http://metlin.scripps.edu/metabo_list.php?mass_min=1142.38&mass_max=1142.68	0	223536	2.53562e+06	1.84668e+06
1346	M266T713	1.49279	-4.16122	0.0801982	266.183	266.183	266.183	712.698	712.355	713.031	4	2	2	http://metlin.scripps.edu/metabo_list.php?mass_min=265.03&mass_max=265.33	1.27704e+07	1.4677e+07	9.71914e+06	8.66745e+06
1347	M684T526	2.48101	7.55941	0.0803014	684.262	684.259	684.266	526.06	525.932	526.188	2	0	2	http://metlin.scripps.edu/metabo_list.php?mass_min=683.11&mass_max=683.41	717446	747917	1.96052e+06	1.67506e+06
1348	M312T908	1.07915	5.80978	0.0803806	312.209	312.209	312.209	908.459	908.409	908.508	2	0	2	http://metlin.scripps.edu/metabo_list.php?mass_min=311.06&mass_max=311.36	3.87803e+06	3.90991e+06	4.1516e+06	4.2528e+06
1349	M406T615	2.68494	-5.11653	0.0803873	406.169	406.161	406.176	615.057	615.021	615.349	4	2	2	http://metlin.scripps.edu/metabo_list.php?mass_min=405.02&mass_max=405.32	1.74755e+07	2.19716e+07	8.23956e+06	6.45241e+06
1350	M741T480	77.1011	7.77305	0.0804507	741.357	741.357	741.359	479.749	479.581	479.847	3	1	2	http://metlin.scripps.edu/metabo_list.php?mass_min=740.21&mass_max=740.51	358593	1.28229e+06	7.12761e+07	5.52378e+07
1351	M702T877	2.90842	-3.44081	0.0804908	701.505	701.505	701.505	877.186	877.174	877.339	4	2	2	http://metlin.scripps.edu/metabo_list.php?mass_min=700.35&mass_max=700.65	2.2673e+07	3.06307e+07	1.23262e+07	6.0012e+06
1352	M595T766	2.41069	-4.46454	0.0805137	595.314	595.312	595.314	766.03	765.905	766.084	4	2	2	http://metlin.scripps.edu/metabo_list.php?mass_min=594.16&mass_max=594.46	4.60192e+06	5.82845e+06	2.4653e+06	1.86141e+06
1353	M788T682	3.02267	-3.75744	0.0806081	787.832	787.832	787.832	682.484	682.484	682.484	1	1	0	http://metlin.scripps.edu/metabo_list.php?mass_min=786.68&mass_max=786.98	5.63239e+06	7.6084e+06	2.83365e+06	1.54685e+06
1354	M807T863	2.96514	-3.5113	0.0806967	806.584	806.584	806.584	862.589	862.4	862.674	4	2	2	http://metlin.scripps.edu/metabo_list.php?mass_min=805.43&mass_max=805.73	2.14598e+08	2.90961e+08	1.1386e+08	5.66408e+07
1355	M595T527	2.98081	-3.48836	0.080724	595.211	595.211	595.211	526.922	526.922	526.922	1	1	0	http://metlin.scripps.edu/metabo_list.php?mass_min=594.06&mass_max=594.36	616352	777171	339351	128147
1356	M289T371	1.39103	-3.31861	0.0807312	289.12	289.113	289.127	370.816	369.908	371.326	4	2	2	http://metlin.scripps.edu/metabo_list.php?mass_min=287.97&mass_max=288.27	2.37043e+07	2.65952e+07	1.96449e+07	1.6515e+07
1357	M376T455	8.19656	-5.78684	0.080772	376.135	376.13	376.135	455.466	437.129	455.748	3	2	1	http://metlin.scripps.edu/metabo_list.php?mass_min=374.98&mass_max=375.28	1.87184e+07	2.5053e+07	3.66732e+06	1.67289e+06
1358	M548T472	13.0605	-7.70136	0.0809086	548.305	548.305	548.305	471.875	471.78	471.971	2	2	0	http://metlin.scripps.edu/metabo_list.php?mass_min=547.16&mass_max=547.46	1.95017e+07	2.48028e+07	1.8694e+06	1.52286e+06
1359	M763T870	2.87794	-3.45381	0.0809314	762.558	762.557	762.558	869.996	869.785	870.1	4	2	2	http://metlin.scripps.edu/metabo_list.php?mass_min=761.41&mass_max=761.71	6.22199e+08	8.40165e+08	3.38953e+08	1.69176e+08
1360	M523T496	2.10553	-6.56148	0.0809583	523.251	523.251	523.252	495.812	495.494	496.062	4	2	2	http://metlin.scripps.edu/metabo_list.php?mass_min=522.1&mass_max=522.4	1.10764e+07	1.29509e+07	5.91949e+06	5.49205e+06
1361	M655T767	2.87322	-3.3089	0.0810205	655.279	655.272	655.285	767.054	766.617	767.491	2	2	0	http://metlin.scripps.edu/metabo_list.php?mass_min=654.13&mass_max=654.43	1.22552e+06	916586	516557	228983
1362	M765T870	2.88022	-3.4429	0.0810266	764.563	764.563	764.563	869.855	869.73	870.1	4	2	2	http://metlin.scripps.edu/metabo_list.php?mass_min=763.41&mass_max=763.71	6.93959e+07	9.3733e+07	3.78636e+07	1.8774e+07
1363	M353T847	2.39499	-4.04567	0.0810787	353.309	353.309	353.309	846.882	846.783	846.979	4	2	2	http://metlin.scripps.edu/metabo_list.php?mass_min=352.16&mass_max=352.46	9.88119e+07	1.13987e+08	5.77331e+07	3.11185e+07
1364	M679T885	2.84647	-3.42674	0.0811954	679.459	679.459	679.46	884.712	884.543	884.872	4	2	2	http://metlin.scripps.edu/metabo_list.php?mass_min=678.31&mass_max=678.61	1.55092e+07	2.09131e+07	8.53882e+06	4.25676e+06
1365	M608T538	2.29184	4.11088	0.0812121	608.253	608.249	608.279	537.58	537.105	542.303	3	1	2	http://metlin.scripps.edu/metabo_list.php?mass_min=607.1&mass_max=607.4	2.1651e+06	2.94395e+06	6.55653e+06	5.15259e+06
1366	M520T781	2.32214	-4.92861	0.0812858	520.333	520.333	520.333	781.002	780.704	781.127	4	2	2	http://metlin.scripps.edu/metabo_list.php?mass_min=519.18&mass_max=519.48	3.07255e+07	3.35831e+07	1.72756e+07	1.04181e+07
1367	M764T870	2.86846	-3.43624	0.0813233	763.56	763.56	763.561	869.855	869.73	870.1	4	2	2	http://metlin.scripps.edu/metabo_list.php?mass_min=762.41&mass_max=762.71	2.589e+08	3.49696e+08	1.41671e+08	7.04973e+07
1368	M210T93	1.73792	3.93906	0.0813534	210.087	210.072	210.091	92.6609	92.4974	93.024	4	2	2	http://metlin.scripps.edu/metabo_list.php?mass_min=208.94&mass_max=209.24	1.57074e+06	1.90288e+06	2.73865e+06	3.29824e+06
1369	M577T323	4.81569	4.09839	0.0813635	577.37	577.37	577.37	322.922	322.737	323.106	2	0	2	http://metlin.scripps.edu/metabo_list.php?mass_min=576.22&mass_max=576.52	285302	2.77575e+06	8.0633e+06	6.67779e+06
1370	M396T842	2.43786	-4.0129	0.0814415	396.332	396.332	396.332	841.865	841.828	841.908	4	2	2	http://metlin.scripps.edu/metabo_list.php?mass_min=395.18&mass_max=395.48	1.35119e+09	1.56482e+09	7.83845e+08	4.12294e+08
1371	M623T728	3.09818	-6.03226	0.0814581	623.376	623.375	623.376	727.573	727.544	727.603	2	2	0	http://metlin.scripps.edu/metabo_list.php?mass_min=622.23&mass_max=622.53	4.09259e+06	4.35039e+06	1.81865e+06	906500
1372	M470T318	1.85864	-7.76894	0.0814756	470.122	470.121	470.122	317.715	317.187	318.193	4	2	2	http://metlin.scripps.edu/metabo_list.php?mass_min=468.97&mass_max=469.27	7.37879e+06	8.31178e+06	4.2248e+06	4.21715e+06
1373	M710T392	9.93319	-7.12457	0.0816351	710.253	710.253	710.253	392.325	392.26	392.391	2	2	0	http://metlin.scripps.edu/metabo_list.php?mass_min=709.1&mass_max=709.4	2.05811e+07	1.60154e+07	2.19367e+06	1.49059e+06
1374	M394T870	3.12649	-3.45009	0.0817786	393.776	393.775	393.776	869.926	869.785	870.1	3	2	1	http://metlin.scripps.edu/metabo_list.php?mass_min=392.63&mass_max=392.93	996893	1.36637e+06	519845	236038
1375	M427T715	1.74698	-4.32539	0.0818324	427.212	427.212	427.212	714.542	714.285	714.651	4	2	2	http://metlin.scripps.edu/metabo_list.php?mass_min=426.06&mass_max=426.36	1.0439e+09	1.24571e+09	7.0655e+08	6.04057e+08
1376	M430T774	2.5789	-5.67498	0.0819093	429.791	429.791	429.791	774.278	774.231	774.381	4	2	2	http://metlin.scripps.edu/metabo_list.php?mass_min=428.64&mass_max=428.94	4.19469e+07	4.47974e+07	2.12749e+07	1.23613e+07
1377	M889T382	11.3653	7.63864	0.0819304	889.322	889.311	889.326	381.571	371.924	391.091	4	2	2	http://metlin.scripps.edu/metabo_list.php?mass_min=888.17&mass_max=888.47	9.16722e+06	1.06589e+07	1.26096e+08	9.9234e+07
1378	M486T756	2.52796	-6.84537	0.0819485	485.843	485.843	485.843	755.73	755.498	755.795	4	2	2	http://metlin.scripps.edu/metabo_list.php?mass_min=484.69&mass_max=484.99	1.39345e+07	1.43925e+07	6.83219e+06	4.37331e+06
1379	M274T370	1.91946	-4.76616	0.0819744	274.087	274.08	274.092	369.515	368.447	370.364	4	2	2	http://metlin.scripps.edu/metabo_list.php?mass_min=272.94&mass_max=273.24	6.68573e+07	8.04303e+07	4.1321e+07	3.54129e+07
1380	M530T760	2.43879	-4.09583	0.0819958	530.341	530.337	530.345	760.269	759.873	760.875	4	2	2	http://metlin.scripps.edu/metabo_list.php?mass_min=529.19&mass_max=529.49	1.13517e+07	1.46274e+07	6.23065e+06	4.42177e+06
1381	M387T788	2.32491	-4.74513	0.0820284	386.768	386.768	386.768	787.592	787.349	787.706	4	2	2	http://metlin.scripps.edu/metabo_list.php?mass_min=385.62&mass_max=385.92	2.22299e+06	2.44807e+06	1.26149e+06	747644
1382	M776T535	3.87766	3.74723	0.0820475	776.384	776.384	776.384	535.005	534.841	535.382	3	1	2	http://metlin.scripps.edu/metabo_list.php?mass_min=775.23&mass_max=775.53	3.28887e+06	7.94512e+06	2.54121e+07	1.81495e+07
1383	M301T314	4.30534	3.39658	0.0821127	301.2	301.198	301.218	313.819	312.372	314.002	4	2	2	http://metlin.scripps.edu/metabo_list.php?mass_min=300.05&mass_max=300.35	9.33538e+06	3.81597e+07	1.20306e+08	8.41762e+07
1384	M440T429	2.84959	-4.44818	0.0821604	440.182	440.182	440.182	429.296	428.995	429.596	2	2	0	http://metlin.scripps.edu/metabo_list.php?mass_min=439.03&mass_max=439.33	1.03818e+07	1.35213e+07	4.95395e+06	3.43435e+06
1385	M808T863	2.98935	-3.50018	0.0821705	807.587	807.587	807.587	862.589	862.4	862.674	4	2	2	http://metlin.scripps.edu/metabo_list.php?mass_min=806.44&mass_max=806.74	9.45653e+07	1.28772e+08	4.99349e+07	2.47762e+07
1386	M531T675	2.38385	-7.58177	0.0824772	531.375	531.375	531.375	675.434	675.323	675.525	4	2	2	http://metlin.scripps.edu/metabo_list.php?mass_min=530.22&mass_max=530.52	1.35088e+07	1.36279e+07	6.72896e+06	4.65461e+06
1387	M397T842	2.43567	-3.98378	0.0825489	397.335	397.335	397.335	841.865	841.828	841.908	4	2	2	http://metlin.scripps.edu/metabo_list.php?mass_min=396.18&mass_max=396.48	3.02731e+08	3.50825e+08	1.76109e+08	9.22181e+07
1388	M741T709	2.7109	-6.4292	0.0826089	741.482	741.48	741.483	708.777	707.186	709.163	4	2	2	http://metlin.scripps.edu/metabo_list.php?mass_min=740.33&mass_max=740.63	2.66541e+06	2.78499e+06	1.26603e+06	744527
1389	M680T885	2.50698	-3.37338	0.0826406	680.46	680.458	680.461	884.873	884.872	885.122	3	2	1	http://metlin.scripps.edu/metabo_list.php?mass_min=679.31&mass_max=679.61	5.67355e+06	7.50185e+06	3.36418e+06	1.89131e+06
1390	M675T885	2.81332	-3.37057	0.0826592	674.505	674.505	674.505	884.873	884.795	884.967	4	2	2	http://metlin.scripps.edu/metabo_list.php?mass_min=673.36&mass_max=673.66	8.5518e+08	1.15413e+09	4.77798e+08	2.36416e+08
1391	M511T683	1.59877	-5.1459	0.0826697	511.235	511.234	511.235	683.122	682.909	683.337	4	2	2	http://metlin.scripps.edu/metabo_list.php?mass_min=510.08&mass_max=510.38	1.51419e+08	1.73535e+08	1.05816e+08	9.74365e+07
1392	M305T283	4.82587	7.21021	0.0827046	305.021	305.021	305.022	283.204	283.191	283.217	2	0	2	http://metlin.scripps.edu/metabo_list.php?mass_min=303.87&mass_max=304.17	270150	309375	1.55085e+06	1.24586e+06
222	M680T1008	Inf	37.8169	0.0168304	680.48	680.48	680.48	1008.28	1007.99	1008.56	2	0	2	http://metlin.scripps.edu/metabo_list.php?mass_min=679.33&mass_max=679.63	0	0	5.12003e+06	5.39817e+06
1394	M746T870	2.67622	-3.63803	0.0827266	745.524	745.507	745.53	869.996	869.775	870.116	4	2	2	http://metlin.scripps.edu/metabo_list.php?mass_min=744.37&mass_max=744.67	1.39725e+07	1.86333e+07	7.6561e+06	4.52741e+06
1395	M498T323	10.0228	7.37141	0.0827987	498.21	498.209	498.21	323.4	323.377	323.423	2	0	2	http://metlin.scripps.edu/metabo_list.php?mass_min=497.06&mass_max=497.36	1.36968e+06	1.07282e+06	1.37278e+07	1.07529e+07
1396	M401T705	2.43117	-6.18084	0.0828603	400.77	400.77	400.77	704.671	704.53	704.759	3	2	1	http://metlin.scripps.edu/metabo_list.php?mass_min=399.62&mass_max=399.92	2.90372e+07	3.04399e+07	1.49764e+07	9.48807e+06
1397	M649T722	2.40126	-4.57434	0.0829334	649.481	649.481	649.481	721.53	721.376	721.689	4	2	2	http://metlin.scripps.edu/metabo_list.php?mass_min=648.33&mass_max=648.63	2.72089e+07	3.02632e+07	1.52997e+07	8.63445e+06
1398	M750T658	25.463	-7.54237	0.0830235	750.442	750.442	750.442	658.415	658.129	658.541	4	2	2	http://metlin.scripps.edu/metabo_list.php?mass_min=749.29&mass_max=749.59	9.79259e+07	1.26467e+08	5.1761e+06	3.63641e+06
1399	M476T392	16.6741	6.63166	0.0830319	476.183	476.183	476.217	391.721	391.685	406.953	3	1	2	http://metlin.scripps.edu/metabo_list.php?mass_min=475.03&mass_max=475.33	4.06512e+06	1.4733e+06	5.25896e+07	3.97586e+07
1400	M737T710	2.42669	-5.18732	0.0830415	736.531	736.531	736.531	710.162	710.117	710.229	4	2	2	http://metlin.scripps.edu/metabo_list.php?mass_min=735.38&mass_max=735.68	1.33634e+08	1.44608e+08	7.21114e+07	4.25473e+07
1401	M810T862	3.08436	-3.54314	0.0830957	809.592	809.592	809.593	862.375	862.292	862.551	4	2	2	http://metlin.scripps.edu/metabo_list.php?mass_min=808.44&mass_max=808.74	5.39843e+06	7.39273e+06	2.77618e+06	1.37093e+06
1402	M915T434	3.32749	-4.35077	0.0831189	915.343	915.343	915.344	433.903	433.183	434.853	4	2	2	http://metlin.scripps.edu/metabo_list.php?mass_min=914.19&mass_max=914.49	2.08673e+07	2.78944e+07	9.0647e+06	5.5895e+06
1403	M343T263	2.0161	4.91167	0.0831484	343.148	343.14	343.149	262.875	262.706	264.073	3	1	2	http://metlin.scripps.edu/metabo_list.php?mass_min=342&mass_max=342.3	1.19317e+06	1.75879e+06	3.09083e+06	2.8606e+06
1404	M331T682	2.26462	-3.75051	0.0831864	331.123	331.118	331.131	682.495	682.284	682.707	4	2	2	http://metlin.scripps.edu/metabo_list.php?mass_min=329.97&mass_max=330.27	7.73998e+06	9.97121e+06	4.61322e+06	3.20759e+06
1405	M380T842	2.44369	-4.00437	0.0832335	380.309	380.308	380.309	841.865	841.828	841.908	4	2	2	http://metlin.scripps.edu/metabo_list.php?mass_min=379.16&mass_max=379.46	1.43197e+08	1.65555e+08	8.3017e+07	4.33294e+07
1406	M938T373	46.0177	7.60071	0.0832502	938.355	938.355	938.355	373.345	373.218	373.472	2	0	2	http://metlin.scripps.edu/metabo_list.php?mass_min=937.21&mass_max=937.51	172405	153532	8.46461e+06	6.53423e+06
1407	M735T710	2.41409	-5.14526	0.0832905	734.525	734.525	734.525	710.162	710.117	710.229	4	2	2	http://metlin.scripps.edu/metabo_list.php?mass_min=733.38&mass_max=733.68	1.29786e+09	1.40593e+09	7.04111e+08	4.15892e+08
1408	M693T716	2.39418	-4.57123	0.0833177	692.505	692.504	692.505	715.806	715.6	715.855	4	2	2	http://metlin.scripps.edu/metabo_list.php?mass_min=691.35&mass_max=691.65	1.52324e+08	1.69332e+08	8.58139e+07	4.85351e+07
1409	M504T782	2.6689	-5.59368	0.0833261	504.31	504.31	504.31	781.802	781.584	782.02	2	2	0	http://metlin.scripps.edu/metabo_list.php?mass_min=503.16&mass_max=503.46	8.31818e+06	8.90439e+06	4.14348e+06	2.30959e+06
1410	M617T689	2.77631	-3.4923	0.0833643	617.419	617.413	617.425	688.714	688.176	689.251	2	2	0	http://metlin.scripps.edu/metabo_list.php?mass_min=616.27&mass_max=616.57	1.55469e+06	2.09638e+06	853754	461326
1411	M638T489	2.90303	-4.15931	0.0833797	638.255	638.254	638.256	488.512	488.498	488.526	2	2	0	http://metlin.scripps.edu/metabo_list.php?mass_min=637.1&mass_max=637.4	2.45498e+06	1.8546e+06	901063	583449
1412	M623T320	22.269	6.19084	0.0834009	623.376	623.371	623.376	320.143	319.789	320.217	3	1	2	http://metlin.scripps.edu/metabo_list.php?mass_min=622.23&mass_max=622.53	400608	4.43097e+06	6.18483e+07	4.57459e+07
1413	M352T847	2.38046	-4.04559	0.0834403	352.306	352.305	352.306	846.882	846.783	846.979	4	2	2	http://metlin.scripps.edu/metabo_list.php?mass_min=351.16&mass_max=351.46	4.96085e+08	5.69992e+08	2.908e+08	1.57044e+08
1414	M445T694	2.25595	-6.00082	0.0834676	444.796	444.796	444.796	694.276	694.211	694.442	4	2	2	http://metlin.scripps.edu/metabo_list.php?mass_min=443.65&mass_max=443.95	2.59205e+07	2.72122e+07	1.41547e+07	9.39752e+06
1415	M371T767	2.44218	-6.72892	0.0834811	370.735	370.735	370.736	767.491	767.372	767.573	3	2	1	http://metlin.scripps.edu/metabo_list.php?mass_min=369.59&mass_max=369.89	4.0896e+06	4.22294e+06	2.06048e+06	1.34326e+06
1416	M479T533	2.02141	-7.31343	0.0834959	479.253	479.252	479.254	532.795	532.431	533.549	4	2	2	http://metlin.scripps.edu/metabo_list.php?mass_min=478.1&mass_max=478.4	1.84799e+07	2.12086e+07	9.95236e+06	9.68171e+06
1417	M738T710	2.44991	-5.31909	0.0835293	737.534	737.534	737.534	710.12	709.909	710.201	4	2	2	http://metlin.scripps.edu/metabo_list.php?mass_min=736.38&mass_max=736.68	2.55574e+07	2.75154e+07	1.36171e+07	8.04607e+06
1418	M818T412	233.989	-7.53998	0.0836196	818.471	818.471	818.471	412.184	412.184	412.184	1	1	0	http://metlin.scripps.edu/metabo_list.php?mass_min=817.32&mass_max=817.62	1.00448e+06	770233	7584.61	0
1419	M748T870	2.79884	-3.26615	0.0836608	747.537	747.537	747.537	869.926	869.926	869.926	1	1	0	http://metlin.scripps.edu/metabo_list.php?mass_min=746.39&mass_max=746.69	1.57046e+06	2.11006e+06	899050	415967
1420	M374T870	2.93955	-3.32302	0.0837242	373.771	373.771	373.771	869.85	869.775	869.926	2	2	0	http://metlin.scripps.edu/metabo_list.php?mass_min=372.62&mass_max=372.92	3.35518e+06	4.56797e+06	1.84871e+06	846655
1421	M676T885	2.79816	-3.34001	0.0837996	675.508	675.507	675.508	884.873	884.795	884.967	4	2	2	http://metlin.scripps.edu/metabo_list.php?mass_min=674.36&mass_max=674.66	3.16238e+08	4.27404e+08	1.77918e+08	8.7843e+07
1422	M946T406	11.3819	-6.96761	0.0838219	946.383	946.383	946.383	405.749	405.666	405.833	2	2	0	http://metlin.scripps.edu/metabo_list.php?mass_min=945.23&mass_max=945.53	4.2771e+06	3.29668e+06	406608	258817
1423	M1056T488	5.39684	-4.42627	0.0840134	1056.42	1056.42	1056.42	488.489	488.318	488.526	4	2	2	http://metlin.scripps.edu/metabo_list.php?mass_min=1055.27&mass_max=1055.57	8.05091e+06	5.75583e+06	1.82475e+06	733546
1424	M544T655	2.49818	-4.71622	0.0840142	544.405	544.405	544.405	655.369	655.168	655.57	4	2	2	http://metlin.scripps.edu/metabo_list.php?mass_min=543.25&mass_max=543.55	2.03827e+07	2.25364e+07	1.10974e+07	6.08279e+06
1425	M779T371	2.77372	-6.2813	0.0840487	779.283	779.27	779.29	371.213	370.988	371.326	4	2	2	http://metlin.scripps.edu/metabo_list.php?mass_min=778.13&mass_max=778.43	1.90797e+07	2.32778e+07	8.12826e+06	7.14279e+06
1426	M412T699	2.30034	-5.66681	0.0840519	411.793	411.793	411.793	699.474	699.273	699.526	4	2	2	http://metlin.scripps.edu/metabo_list.php?mass_min=410.64&mass_max=410.94	2.96913e+08	3.14772e+08	1.62128e+08	1.03783e+08
1427	M522T356	2.87697	-4.1157	0.0840521	522.218	522.216	522.22	355.651	355.601	355.7	2	2	0	http://metlin.scripps.edu/metabo_list.php?mass_min=521.07&mass_max=521.37	4.49905e+06	5.96237e+06	2.20824e+06	1.42802e+06
1428	M248T595	15.7704	-7.28059	0.0840594	248.136	248.136	248.136	594.663	594.559	594.767	2	2	0	http://metlin.scripps.edu/metabo_list.php?mass_min=246.99&mass_max=247.29	3.14271e+06	4.06577e+06	272874	184214
1429	M534T822	2.62868	-4.00452	0.0841482	534.369	534.369	534.369	822.488	822.415	822.519	4	2	2	http://metlin.scripps.edu/metabo_list.php?mass_min=533.22&mass_max=533.52	1.3925e+07	1.61909e+07	7.76408e+06	3.69258e+06
1430	M549T503	5.06031	-6.5482	0.0841589	549.204	549.203	549.204	502.886	502.567	503.677	4	2	2	http://metlin.scripps.edu/metabo_list.php?mass_min=548.05&mass_max=548.35	1.46383e+07	1.1499e+07	2.89963e+06	2.26552e+06
1431	M239T841	1.99945	-3.78255	0.0842192	239.149	239.149	239.149	840.883	840.615	840.898	4	2	2	http://metlin.scripps.edu/metabo_list.php?mass_min=238&mass_max=238.3	9.79681e+06	1.12483e+07	6.44887e+06	4.07658e+06
1432	M381T705	2.43841	-6.20847	0.0842354	381.266	381.265	381.266	704.694	704.53	704.759	4	2	2	http://metlin.scripps.edu/metabo_list.php?mass_min=380.12&mass_max=380.42	5.60999e+07	5.86623e+07	2.88316e+07	1.82328e+07
1433	M658T496	6.78653	7.33894	0.0842421	658.356	658.352	658.36	495.811	495.56	496.062	2	0	2	http://metlin.scripps.edu/metabo_list.php?mass_min=657.21&mass_max=657.51	107062	893325	3.42602e+06	3.36313e+06
1434	M911T388	3.94257	-7.40534	0.0843048	911.331	911.331	911.332	388.239	387.989	388.489	2	2	0	http://metlin.scripps.edu/metabo_list.php?mass_min=910.18&mass_max=910.48	4.97768e+06	5.03906e+06	1.77417e+06	766489
1435	M630T892	2.66189	-3.22812	0.0843535	630.479	630.479	630.479	892.366	892.347	892.522	4	2	2	http://metlin.scripps.edu/metabo_list.php?mass_min=629.33&mass_max=629.63	1.02864e+09	1.36449e+09	6.08749e+08	2.90287e+08
1436	M1049T489	4.38642	-4.30367	0.0843757	1049.43	1049.43	1049.43	488.512	488.498	488.526	2	2	0	http://metlin.scripps.edu/metabo_list.php?mass_min=1048.28&mass_max=1048.58	2.08201e+07	1.5052e+07	5.5154e+06	2.66259e+06
1437	M403T700	2.31329	-5.667	0.084395	403.279	403.277	403.279	699.511	699.454	699.595	4	2	2	http://metlin.scripps.edu/metabo_list.php?mass_min=402.13&mass_max=402.43	4.46923e+07	4.73726e+07	2.43116e+07	1.54867e+07
1438	M878T489	1.55312	-4.56838	0.0844304	878.285	878.285	878.285	488.794	488.794	488.794	1	0	1	http://metlin.scripps.edu/metabo_list.php?mass_min=877.13&mass_max=877.43	2.11365e+06	2.43724e+06	1.5378e+06	1.39236e+06
1439	M630T836	2.30821	-3.21949	0.0844622	630.442	630.442	630.443	836.088	835.784	836.28	4	2	2	http://metlin.scripps.edu/metabo_list.php?mass_min=629.29&mass_max=629.59	1.42821e+07	1.83086e+07	9.10329e+06	5.01616e+06
1440	M827T699	2.5571	-4.76399	0.0844693	826.59	826.59	826.591	699.223	699.172	699.273	2	2	0	http://metlin.scripps.edu/metabo_list.php?mass_min=825.44&mass_max=825.74	818552	903722	438262	235265
1441	M608T781	2.48249	-5.16157	0.0844851	608.385	608.385	608.385	781.415	781.367	781.584	4	2	2	http://metlin.scripps.edu/metabo_list.php?mass_min=607.24&mass_max=607.54	4.064e+07	4.39989e+07	2.16464e+07	1.2448e+07
1442	M636T394	9.86551	-6.45863	0.0845703	636.314	636.313	636.314	394.064	393.655	394.472	2	2	0	http://metlin.scripps.edu/metabo_list.php?mass_min=635.16&mass_max=635.46	2.16193e+06	2.84362e+06	325023	182356
1443	M247T594	15.255	-7.196	0.084615	247.133	247.133	247.133	594.492	594.426	594.559	2	2	0	http://metlin.scripps.edu/metabo_list.php?mass_min=245.98&mass_max=246.28	1.89406e+07	2.45594e+07	1.71603e+06	1.13549e+06
1444	M646T722	2.39442	-4.52414	0.0846185	646.473	646.473	646.474	721.53	721.376	721.689	4	2	2	http://metlin.scripps.edu/metabo_list.php?mass_min=645.32&mass_max=645.62	1.95158e+09	2.17151e+09	1.10249e+09	6.19465e+08
1445	M578T816	2.58659	-3.70584	0.0846299	578.395	578.394	578.396	815.53	815.395	815.7	4	2	2	http://metlin.scripps.edu/metabo_list.php?mass_min=577.24&mass_max=577.54	1.38287e+07	1.65084e+07	7.98763e+06	3.74097e+06
1446	M631T892	2.63877	-3.21867	0.0846398	631.481	631.481	631.482	892.366	892.347	892.522	4	2	2	http://metlin.scripps.edu/metabo_list.php?mass_min=630.33&mass_max=630.63	3.56548e+08	4.71711e+08	2.12341e+08	1.0154e+08
1447	M632T892	2.65863	-3.21771	0.084647	632.484	632.484	632.484	892.366	892.347	892.522	4	2	2	http://metlin.scripps.edu/metabo_list.php?mass_min=631.33&mass_max=631.63	8.18836e+07	1.08412e+08	4.86094e+07	2.29672e+07
1448	M419T314	3.31003	-5.54384	0.0848781	419.153	419.153	419.153	313.672	313.672	313.672	1	0	1	http://metlin.scripps.edu/metabo_list.php?mass_min=418&mass_max=418.3	7.05887e+06	8.98521e+06	2.72706e+06	2.12005e+06
1449	M391T428	5.10052	3.26691	0.0849519	391.14	391.14	391.14	427.918	427.918	427.918	1	0	1	http://metlin.scripps.edu/metabo_list.php?mass_min=389.99&mass_max=390.29	60379.2	594383	1.98217e+06	1.35746e+06
1450	M309T849	2.32492	-4.10379	0.0849654	309.283	309.282	309.283	849.481	849.384	849.55	4	2	2	http://metlin.scripps.edu/metabo_list.php?mass_min=308.13&mass_max=308.43	2.28787e+07	2.60574e+07	1.35274e+07	7.52115e+06
1451	M694T716	2.38054	-4.78012	0.0850336	693.507	693.507	693.507	715.806	715.6	715.855	4	2	2	http://metlin.scripps.edu/metabo_list.php?mass_min=692.36&mass_max=692.66	2.79883e+07	3.07102e+07	1.56191e+07	9.03849e+06
1452	M265T594	5.31104	-6.10708	0.0850561	265.147	265.147	265.148	593.814	593.746	593.882	2	2	0	http://metlin.scripps.edu/metabo_list.php?mass_min=264&mass_max=264.3	1.493e+07	1.93535e+07	3.77448e+06	2.68065e+06
1453	M736T710	2.41663	-5.16375	0.0850992	735.528	735.528	735.528	710.162	710.117	710.229	4	2	2	http://metlin.scripps.edu/metabo_list.php?mass_min=734.38&mass_max=734.68	5.13897e+08	5.55096e+08	2.78248e+08	1.64101e+08
1454	M916T433	3.45392	-4.35938	0.0851002	916.346	916.346	916.346	433.188	433.183	433.194	2	2	0	http://metlin.scripps.edu/metabo_list.php?mass_min=915.2&mass_max=915.5	4.85452e+06	6.52684e+06	2.04883e+06	1.24637e+06
1455	M648T722	2.38971	-4.50819	0.0851043	648.478	648.478	648.478	721.53	721.376	721.689	4	2	2	http://metlin.scripps.edu/metabo_list.php?mass_min=647.33&mass_max=647.63	1.59123e+08	1.77076e+08	9.00821e+07	5.06041e+07
1456	M647T722	2.38558	-4.51836	0.0851069	647.476	647.475	647.476	721.53	721.376	721.689	4	2	2	http://metlin.scripps.edu/metabo_list.php?mass_min=646.33&mass_max=646.63	6.7693e+08	7.52779e+08	3.83357e+08	2.15956e+08
1457	M311T682	2.84451	-3.92019	0.0851487	311.124	311.12	311.136	682.239	682.078	682.484	4	2	2	http://metlin.scripps.edu/metabo_list.php?mass_min=309.97&mass_max=310.27	8.0788e+06	1.07921e+07	4.08868e+06	2.54547e+06
1458	M477T533	1.87649	-6.44019	0.0852251	477.248	477.248	477.249	533.195	533.076	533.406	4	2	2	http://metlin.scripps.edu/metabo_list.php?mass_min=476.1&mass_max=476.4	2.9945e+08	3.45248e+08	1.76496e+08	1.67069e+08
1459	M520T398	11.9548	7.39927	0.0852938	520.242	520.242	520.242	398.469	396.601	400.336	2	0	2	http://metlin.scripps.edu/metabo_list.php?mass_min=519.09&mass_max=519.39	1.47217e+06	1.59459e+06	2.06007e+07	1.60619e+07
1460	M493T409	2.06519	-5.96243	0.0854155	493.241	493.239	493.243	408.526	408.245	408.832	4	2	2	http://metlin.scripps.edu/metabo_list.php?mass_min=492.09&mass_max=492.39	7.81122e+06	8.16094e+06	4.53534e+06	3.19866e+06
1461	M587T494	5.34372	4.23592	0.0854327	587.355	587.355	587.355	493.851	493.669	494.152	3	1	2	http://metlin.scripps.edu/metabo_list.php?mass_min=586.2&mass_max=586.5	4.56359e+06	1.05638e+08	3.19714e+08	2.69173e+08
1462	M389T659	2.285	-6.55701	0.0854334	389.193	389.193	389.193	658.776	658.541	659.003	4	2	2	http://metlin.scripps.edu/metabo_list.php?mass_min=388.04&mass_max=388.34	6.00163e+08	7.10622e+08	2.97275e+08	2.76373e+08
1463	M328T783	1.04994	6.95648	0.0854449	328.321	328.321	328.321	782.617	781.78	782.986	4	2	2	http://metlin.scripps.edu/metabo_list.php?mass_min=327.17&mass_max=327.47	4.21311e+06	4.20515e+06	4.44928e+06	4.38938e+06
1464	M677T885	2.8078	-3.30355	0.0854865	676.51	676.51	676.511	884.873	884.795	884.967	4	2	2	http://metlin.scripps.edu/metabo_list.php?mass_min=675.36&mass_max=675.66	7.64473e+07	1.03762e+08	4.31303e+07	2.10514e+07
1465	M429T680	3.1045	-4.22519	0.0855	429.187	429.186	429.187	679.882	679.668	680.096	2	2	0	http://metlin.scripps.edu/metabo_list.php?mass_min=428.04&mass_max=428.34	2.77681e+07	3.70659e+07	1.27739e+07	8.11005e+06
1466	M532T755	3.04623	-4.30423	0.0855813	532.358	532.351	532.362	754.835	754.426	754.866	4	2	2	http://metlin.scripps.edu/metabo_list.php?mass_min=531.21&mass_max=531.51	1.10802e+07	1.46978e+07	5.11106e+06	3.35119e+06
1467	M748T394	4.62019	7.38987	0.0856106	748.334	748.334	748.334	393.771	393.279	394.263	2	0	2	http://metlin.scripps.edu/metabo_list.php?mass_min=747.18&mass_max=747.48	369828	372499	1.89667e+06	1.53302e+06
1468	M1062T683	1.71543	-3.32155	0.0856724	1062.43	1062.43	1062.43	682.808	682.392	682.909	4	2	2	http://metlin.scripps.edu/metabo_list.php?mass_min=1061.28&mass_max=1061.58	2.00312e+07	2.44068e+07	1.46835e+07	1.12213e+07
1469	M657T885	2.8775	-3.32465	0.0857835	657.478	657.478	657.479	884.834	884.63	884.873	4	2	2	http://metlin.scripps.edu/metabo_list.php?mass_min=656.33&mass_max=656.63	3.11859e+07	4.25577e+07	1.72897e+07	8.33789e+06
1470	M291T849	2.33126	-4.09146	0.0859031	291.253	291.253	291.253	849.481	849.384	849.55	4	2	2	http://metlin.scripps.edu/metabo_list.php?mass_min=290.1&mass_max=290.4	1.02638e+08	1.16886e+08	6.06452e+07	3.35204e+07
1471	M629T722	2.45009	-4.5366	0.0859213	629.447	629.447	629.447	721.53	721.376	721.689	4	2	2	http://metlin.scripps.edu/metabo_list.php?mass_min=628.3&mass_max=628.6	1.51948e+08	1.68968e+08	8.46167e+07	4.6365e+07
1472	M472T375	21.8139	7.36126	0.0859215	472.16	472.16	472.161	374.703	374.105	375.382	4	2	2	http://metlin.scripps.edu/metabo_list.php?mass_min=471.01&mass_max=471.31	1.43984e+07	1.35644e+07	3.44519e+08	2.65459e+08
1473	M387T757	2.53482	-4.86877	0.0859979	387.271	387.271	387.271	756.576	756.335	756.743	4	2	2	http://metlin.scripps.edu/metabo_list.php?mass_min=386.12&mass_max=386.42	1.06925e+08	1.1716e+08	5.71615e+07	3.12412e+07
1474	M624T320	23.5365	6.04433	0.086001	624.379	624.379	624.379	320.18	320.143	320.217	2	0	2	http://metlin.scripps.edu/metabo_list.php?mass_min=623.23&mass_max=623.53	86122	1.5654e+06	2.24243e+07	1.64468e+07
1475	M841T488	2.44823	-3.55832	0.0862818	841.391	841.377	841.42	488.094	487.226	488.838	4	2	2	http://metlin.scripps.edu/metabo_list.php?mass_min=840.24&mass_max=840.54	1.5613e+07	1.1817e+07	6.86537e+06	4.33866e+06
1476	M219T870	3.10834	-3.21564	0.0862847	218.953	218.953	218.953	870.1	870.1	870.1	1	1	0	http://metlin.scripps.edu/metabo_list.php?mass_min=217.8&mass_max=218.1	308856	424809	169260	66771.4
1477	M766T633	2.27196	-6.15635	0.086306	765.54	765.54	765.54	633.125	633.125	633.125	1	1	0	http://metlin.scripps.edu/metabo_list.php?mass_min=764.39&mass_max=764.69	1.20041e+06	1.25069e+06	648001	430846
1478	M401T581	6.80353	-6.75514	0.0863732	401.204	401.204	401.204	581.448	581.448	581.448	1	1	0	http://metlin.scripps.edu/metabo_list.php?mass_min=400.05&mass_max=400.35	1.82712e+07	1.42158e+07	2.69694e+06	2.07808e+06
1479	M442T768	2.45	-5.16346	0.0864076	441.817	441.817	441.817	767.766	767.696	767.892	4	2	2	http://metlin.scripps.edu/metabo_list.php?mass_min=440.67&mass_max=440.97	3.5666e+07	3.84921e+07	1.91425e+07	1.11261e+07
1480	M913T434	3.41507	-4.26028	0.0865097	913.337	913.337	913.337	433.861	433.183	434.613	4	2	2	http://metlin.scripps.edu/metabo_list.php?mass_min=912.19&mass_max=912.49	1.28435e+08	1.73466e+08	5.51968e+07	3.32059e+07
1481	M775T535	3.74474	3.63528	0.0865435	775.381	775.38	775.381	535.049	534.841	535.324	3	1	2	http://metlin.scripps.edu/metabo_list.php?mass_min=774.23&mass_max=774.53	6.90861e+06	1.63317e+07	5.09155e+07	3.61133e+07
1482	M556T816	2.51664	-4.00606	0.0865501	556.413	556.411	556.414	815.649	815.462	815.712	4	2	2	http://metlin.scripps.edu/metabo_list.php?mass_min=555.26&mass_max=555.56	5.31439e+07	6.13123e+07	3.03185e+07	1.51613e+07
1483	M690T716	2.36509	-4.5205	0.0865817	690.499	690.499	690.499	715.806	715.6	715.855	4	2	2	http://metlin.scripps.edu/metabo_list.php?mass_min=689.35&mass_max=689.65	1.65415e+09	1.83469e+09	9.41187e+08	5.3395e+08
1484	M322T762	2.39203	-4.70085	0.0866498	322.267	322.267	322.267	761.521	761.456	761.573	4	2	2	http://metlin.scripps.edu/metabo_list.php?mass_min=321.12&mass_max=321.42	5.95869e+07	6.5524e+07	3.33041e+07	1.89991e+07
1485	M308T683	1.72401	-4.40891	0.0866688	307.617	307.617	307.617	682.708	682.506	682.909	2	1	1	http://metlin.scripps.edu/metabo_list.php?mass_min=306.47&mass_max=306.77	4.31589e+06	4.67449e+06	2.99623e+06	2.21858e+06
1486	M420T700	2.26125	-5.80878	0.0866804	420.306	420.306	420.306	699.511	699.454	699.595	4	2	2	http://metlin.scripps.edu/metabo_list.php?mass_min=419.16&mass_max=419.46	7.16634e+08	7.53523e+08	3.93207e+08	2.56946e+08
1487	M477T317	1.41635	-4.33164	0.0867082	477.223	477.223	477.223	317.187	316.957	317.559	3	1	2	http://metlin.scripps.edu/metabo_list.php?mass_min=476.07&mass_max=476.37	6.08358e+07	6.87839e+07	4.38737e+07	4.76429e+07
1488	M599T808	2.59836	-4.12835	0.0867152	599.436	599.436	599.437	808.409	808.325	808.565	4	2	2	http://metlin.scripps.edu/metabo_list.php?mass_min=598.29&mass_max=598.59	1.5332e+08	1.75668e+08	8.51219e+07	4.1492e+07
1489	M533T823	2.59454	-4.02438	0.0867416	533.365	533.365	533.365	822.806	822.732	822.845	4	2	2	http://metlin.scripps.edu/metabo_list.php?mass_min=532.21&mass_max=532.51	4.87249e+07	5.62735e+07	2.73078e+07	1.31611e+07
1490	M1107T370	11.7507	-7.29251	0.0867559	1107.36	1107.36	1107.36	370.364	370.364	370.364	1	1	0	http://metlin.scripps.edu/metabo_list.php?mass_min=1106.21&mass_max=1106.51	2.68019e+06	2.08266e+06	203125	202200
1491	M200T658	2.58146	-5.11353	0.0868258	200.12	200.117	200.123	657.774	657.737	657.811	2	2	0	http://metlin.scripps.edu/metabo_list.php?mass_min=198.97&mass_max=199.27	6.53333e+06	8.19551e+06	3.14899e+06	2.55663e+06
1492	M312T289	2.08507	-3.95691	0.0868614	312.217	312.217	312.217	289.495	289.007	289.78	4	2	2	http://metlin.scripps.edu/metabo_list.php?mass_min=311.07&mass_max=311.37	1.84106e+07	2.32118e+07	1.12958e+07	8.66633e+06
1493	M842T392	9.04736	-6.50038	0.0868895	842.363	842.357	842.368	391.879	391.091	392.574	4	2	2	http://metlin.scripps.edu/metabo_list.php?mass_min=841.21&mass_max=841.51	3.37285e+07	2.57259e+07	4.01753e+06	2.55393e+06
1494	M616T736	2.16065	-3.96983	0.0869146	616.426	616.425	616.428	736.462	736.221	736.76	4	2	2	http://metlin.scripps.edu/metabo_list.php?mass_min=615.28&mass_max=615.58	4.77017e+06	5.43008e+06	2.96659e+06	1.75433e+06
1495	M585T728	2.4861	-4.50534	0.0869487	585.421	585.421	585.421	727.573	727.519	727.613	4	2	2	http://metlin.scripps.edu/metabo_list.php?mass_min=584.27&mass_max=584.57	1.71636e+08	1.91148e+08	9.49634e+07	5.09617e+07
1496	M415T707	2.31725	-4.99152	0.0870195	415.253	415.253	415.253	706.889	706.679	707.012	4	2	2	http://metlin.scripps.edu/metabo_list.php?mass_min=414.1&mass_max=414.4	1.65429e+07	1.79091e+07	9.27281e+06	5.59483e+06
1497	M652T274	1.87164	5.68354	0.0873183	652.224	652.218	652.225	274.237	274.049	274.563	4	2	2	http://metlin.scripps.edu/metabo_list.php?mass_min=651.07&mass_max=651.37	2.2192e+06	2.41158e+06	4.67541e+06	3.99177e+06
1498	M588T494	5.35627	4.28231	0.0873323	588.358	588.358	588.359	493.851	493.669	494.152	3	1	2	http://metlin.scripps.edu/metabo_list.php?mass_min=587.21&mass_max=587.51	1.62988e+06	3.78661e+07	1.14454e+08	9.70979e+07
1499	M383T870	2.51944	-3.40063	0.08734	382.793	382.789	382.831	869.855	869.775	870.066	4	2	2	http://metlin.scripps.edu/metabo_list.php?mass_min=381.64&mass_max=381.94	3.21362e+06	4.2933e+06	1.87926e+06	1.10035e+06
1500	M335T847	2.38258	-4.01884	0.0874434	335.279	335.279	335.279	847.042	846.942	847.15	4	2	2	http://metlin.scripps.edu/metabo_list.php?mass_min=334.13&mass_max=334.43	4.00777e+08	4.58898e+08	2.3525e+08	1.25568e+08
1501	M885T263	2.3153	4.21821	0.0874667	885.398	885.398	885.398	262.791	262.706	262.875	2	0	2	http://metlin.scripps.edu/metabo_list.php?mass_min=884.25&mass_max=884.55	1.57946e+06	2.80805e+06	5.38011e+06	4.77827e+06
1502	M495T756	2.53634	-7.22687	0.0875315	495.357	495.357	495.357	755.697	755.697	755.697	1	0	1	http://metlin.scripps.edu/metabo_list.php?mass_min=494.21&mass_max=494.51	4.31328e+06	4.31564e+06	2.06268e+06	1.33944e+06
1503	M294T178	18.0801	-7.11271	0.0875495	294.095	294.095	294.095	178.398	178.117	178.678	2	2	0	http://metlin.scripps.edu/metabo_list.php?mass_min=292.94&mass_max=293.24	1.02067e+07	1.33254e+07	753841	547711
1504	M474T762	2.51879	-6.0658	0.0875747	473.817	473.817	473.817	761.843	761.773	761.894	4	2	2	http://metlin.scripps.edu/metabo_list.php?mass_min=472.67&mass_max=472.97	2.7721e+07	2.89983e+07	1.40051e+07	8.51341e+06
1505	M545T347	35.1083	7.21622	0.0876201	545.245	545.245	545.245	347.408	347.327	347.49	2	0	2	http://metlin.scripps.edu/metabo_list.php?mass_min=544.1&mass_max=544.4	202391	225817	8.52876e+06	6.50491e+06
1506	M908T762	2.81926	-7.05382	0.0876347	907.62	907.62	907.62	761.836	761.836	761.836	1	1	0	http://metlin.scripps.edu/metabo_list.php?mass_min=906.47&mass_max=906.77	3.24252e+06	3.19543e+06	1.43531e+06	848243
1507	M385T870	2.82917	-3.19893	0.0876378	384.762	384.762	384.762	870.177	870.1	870.253	2	2	0	http://metlin.scripps.edu/metabo_list.php?mass_min=383.61&mass_max=383.91	935172	1.2205e+06	545601	216344
1508	M677T642	2.36659	-5.55414	0.0876758	677.488	677.488	677.488	641.717	641.717	641.717	1	1	0	http://metlin.scripps.edu/metabo_list.php?mass_min=676.34&mass_max=676.64	4.23747e+06	4.49419e+06	2.28015e+06	1.4094e+06
1509	M740T765	2.7626	-6.44684	0.0877758	740.464	740.464	740.464	764.583	764.317	765.112	4	2	2	http://metlin.scripps.edu/metabo_list.php?mass_min=739.31&mass_max=739.61	4.89167e+06	5.06783e+06	2.28745e+06	1.31767e+06
1510	M514T766	1.86504	-3.24638	0.0878064	514.305	514.276	514.308	765.758	765.588	765.981	3	2	1	http://metlin.scripps.edu/metabo_list.php?mass_min=513.16&mass_max=513.46	3.50276e+06	4.37624e+06	2.46733e+06	1.75724e+06
1511	M579T734	3.07656	-5.22281	0.0878776	579.348	579.346	579.349	733.587	733.025	733.632	3	2	1	http://metlin.scripps.edu/metabo_list.php?mass_min=578.2&mass_max=578.5	4.86046e+06	5.27698e+06	2.26859e+06	1.02647e+06
1512	M308T849	2.29311	-4.11578	0.0878968	308.28	308.277	308.28	849.481	849.384	849.55	4	2	2	http://metlin.scripps.edu/metabo_list.php?mass_min=307.13&mass_max=307.43	1.31771e+08	1.49172e+08	7.84256e+07	4.40906e+07
1513	M1308T683	5.66717	-7.14072	0.0879045	1307.55	1307.55	1307.55	682.551	682.506	682.596	2	1	1	http://metlin.scripps.edu/metabo_list.php?mass_min=1306.4&mass_max=1306.7	3.85392e+06	3.89518e+06	1.13006e+06	237305
1514	M562T407	2.35531	3.4959	0.0879165	562.322	562.322	562.323	407.383	407.276	407.49	2	0	2	http://metlin.scripps.edu/metabo_list.php?mass_min=561.17&mass_max=561.47	569131	883789	1.94464e+06	1.47744e+06
1515	M569T468	1.88378	6.9078	0.0879284	569.149	569.148	569.151	467.758	467.599	467.917	2	0	2	http://metlin.scripps.edu/metabo_list.php?mass_min=568&mass_max=568.3	1.03583e+06	1.33778e+06	2.2195e+06	2.25184e+06
1516	M544T792	1.24955	4.6252	0.0879678	543.842	543.842	543.843	792.392	792.072	792.645	4	2	2	http://metlin.scripps.edu/metabo_list.php?mass_min=542.69&mass_max=542.99	1.04637e+06	1.09086e+06	1.28209e+06	1.38848e+06
1517	M229T716	1.54419	-4.00762	0.0879744	229.159	229.159	229.159	715.806	715.54	716.235	4	2	2	http://metlin.scripps.edu/metabo_list.php?mass_min=228.01&mass_max=228.31	3.6905e+06	4.00684e+06	2.79155e+06	2.19316e+06
1518	M426T555	1.84666	-4.53207	0.0880482	426.191	426.191	426.191	555.093	555.093	555.093	1	1	0	http://metlin.scripps.edu/metabo_list.php?mass_min=425.04&mass_max=425.34	1.19302e+07	1.29279e+07	7.88477e+06	5.5764e+06
1519	M635T893	2.74133	-3.15091	0.0880972	635.433	635.432	635.435	892.694	892.672	892.85	4	2	2	http://metlin.scripps.edu/metabo_list.php?mass_min=634.28&mass_max=634.58	1.52167e+07	2.00939e+07	9.03299e+06	3.84784e+06
1520	M474T392	65.4881	7.17877	0.0881	474.183	474.177	474.195	391.833	391.685	392.391	4	2	2	http://metlin.scripps.edu/metabo_list.php?mass_min=473.03&mass_max=473.33	1.57942e+07	1.4013e+07	1.10989e+09	8.4213e+08
1521	M861T536	137.62	7.16778	0.0882239	861.373	861.373	861.373	535.726	535.644	535.808	2	0	2	http://metlin.scripps.edu/metabo_list.php?mass_min=860.22&mass_max=860.52	31059.2	43231.8	5.81996e+06	4.404e+06
1522	M336T847	2.38117	-4.0689	0.0882609	336.282	336.282	336.282	847.042	846.942	847.15	4	2	2	http://metlin.scripps.edu/metabo_list.php?mass_min=335.13&mass_max=335.43	8.00716e+07	9.12321e+07	4.68307e+07	2.51102e+07
1523	M1049T683	1.43586	-3.14087	0.088292	1049.47	1049.46	1049.47	682.82	682.796	682.909	3	2	1	http://metlin.scripps.edu/metabo_list.php?mass_min=1048.32&mass_max=1048.62	1.17198e+07	1.34083e+07	9.62296e+06	7.87741e+06
1524	M668T274	1.93108	3.8924	0.0883631	668.196	668.194	668.201	273.93	273.379	274.143	3	1	2	http://metlin.scripps.edu/metabo_list.php?mass_min=667.05&mass_max=667.35	758816	957138	1.8365e+06	1.47713e+06
1525	M251T360	2.78813	3.23991	0.0883828	251.164	251.164	251.164	359.755	359.743	359.767	2	0	2	http://metlin.scripps.edu/metabo_list.php?mass_min=250.01&mass_max=250.31	2.61445e+07	5.39071e+07	1.28782e+08	9.44129e+07
1526	M623T808	2.62035	-3.38613	0.0884333	623.421	623.421	623.421	808.251	808.135	808.366	2	2	0	http://metlin.scripps.edu/metabo_list.php?mass_min=622.27&mass_max=622.57	2.69656e+06	3.33803e+06	1.59954e+06	703438
1527	M254T370	4.06755	-6.58288	0.088587	254.094	254.087	254.112	369.99	362.916	370.957	4	2	2	http://metlin.scripps.edu/metabo_list.php?mass_min=252.94&mass_max=253.24	4.344e+07	3.46032e+07	1.02733e+07	8.91352e+06
1528	M535T761	2.3365	-5.00089	0.088768	535.296	535.291	535.301	760.854	760.247	761.573	4	2	2	http://metlin.scripps.edu/metabo_list.php?mass_min=534.15&mass_max=534.45	1.38662e+07	1.72118e+07	7.25126e+06	6.04986e+06
1529	M360T878	3.0608	-3.56095	0.08878	359.769	359.769	359.775	877.51	877.339	877.526	4	2	2	http://metlin.scripps.edu/metabo_list.php?mass_min=358.62&mass_max=358.92	4.77286e+06	6.57934e+06	2.43405e+06	1.27484e+06
1530	M470T402	4.32944	-6.33198	0.0887882	470.121	470.121	470.121	402.137	402.137	402.137	1	1	0	http://metlin.scripps.edu/metabo_list.php?mass_min=468.97&mass_max=469.27	1.75371e+07	1.3797e+07	3.96994e+06	3.26752e+06
1531	M692T716	2.36938	-4.53854	0.0889026	691.502	691.502	691.502	715.806	715.6	715.855	4	2	2	http://metlin.scripps.edu/metabo_list.php?mass_min=690.35&mass_max=690.65	6.18588e+08	6.8355e+08	3.51066e+08	1.98503e+08
1532	M216T715	1.68453	-4.30465	0.0892377	216.146	216.146	216.146	714.715	714.565	714.967	4	2	2	http://metlin.scripps.edu/metabo_list.php?mass_min=215&mass_max=215.3	1.28578e+07	1.52674e+07	8.90553e+06	7.79055e+06
1533	M493T756	2.46339	-6.5986	0.0892465	493.353	493.353	493.353	755.779	755.697	755.813	4	2	2	http://metlin.scripps.edu/metabo_list.php?mass_min=492.2&mass_max=492.5	5.51699e+08	5.66041e+08	2.7667e+08	1.7707e+08
1534	M415T925	2.55944	-3.22403	0.0892883	415.304	415.303	415.305	925.454	925.341	925.903	4	2	2	http://metlin.scripps.edu/metabo_list.php?mass_min=414.15&mass_max=414.45	3.76467e+07	5.06458e+07	2.24791e+07	1.20177e+07
1535	M775T489	3.32618	3.16592	0.0893341	775.38	775.38	775.38	488.944	487.874	489.737	3	1	2	http://metlin.scripps.edu/metabo_list.php?mass_min=774.23&mass_max=774.53	3.99818e+06	1.40187e+07	3.42889e+07	2.56383e+07
1536	M423T836	2.45474	-3.98383	0.0893562	423.332	423.331	423.332	836.088	835.953	836.101	4	2	2	http://metlin.scripps.edu/metabo_list.php?mass_min=422.18&mass_max=422.48	3.94416e+08	4.52951e+08	2.28417e+08	1.1678e+08
1537	M517T648	1.03214	5.10975	0.0893994	517.367	517.367	517.367	648.463	648.447	648.478	2	0	2	http://metlin.scripps.edu/metabo_list.php?mass_min=516.22&mass_max=516.52	2.52715e+06	2.55743e+06	2.62916e+06	2.61885e+06
1538	M473T374	12.7132	7.0415	0.0895174	473.164	473.164	473.232	374.172	374.105	374.748	3	1	2	http://metlin.scripps.edu/metabo_list.php?mass_min=472.01&mass_max=472.31	7.02399e+06	6.35038e+06	9.61338e+07	7.38965e+07
1539	M591T705	2.35604	-5.50869	0.0895176	591.358	591.358	591.358	705.017	704.53	705.082	4	2	2	http://metlin.scripps.edu/metabo_list.php?mass_min=590.21&mass_max=590.51	2.15999e+07	2.28857e+07	1.1674e+07	7.20749e+06
1540	M424T836	2.45005	-3.96392	0.0895951	424.335	424.335	424.335	836.088	835.953	836.101	4	2	2	http://metlin.scripps.edu/metabo_list.php?mass_min=423.18&mass_max=423.48	9.41846e+07	1.08279e+08	5.46895e+07	2.79468e+07
1541	M822T875	3.15726	-3.30342	0.089609	821.57	821.57	821.57	874.709	874.709	874.709	1	1	0	http://metlin.scripps.edu/metabo_list.php?mass_min=820.42&mass_max=820.72	1.69325e+06	2.3665e+06	893846	392002
1542	M696T714	2.4021	-5.00169	0.0896731	696.45	696.449	696.45	713.617	712.987	713.706	4	2	2	http://metlin.scripps.edu/metabo_list.php?mass_min=695.3&mass_max=695.6	2.54839e+07	2.75451e+07	1.39556e+07	8.12052e+06
1543	M266T596	2.11105	-3.18161	0.0897694	266.154	266.147	266.162	596.039	594.559	597.52	2	2	0	http://metlin.scripps.edu/metabo_list.php?mass_min=265&mass_max=265.3	3.89093e+06	3.01402e+06	2.00139e+06	1.26948e+06
1544	M669T371	4.30855	-6.95469	0.0897817	668.718	668.718	668.718	370.676	370.676	370.676	1	1	0	http://metlin.scripps.edu/metabo_list.php?mass_min=667.57&mass_max=667.87	685750	855640	183949	173803
1545	M704T412	4.08072	-5.40722	0.0897925	704.355	704.355	704.355	412.268	412.184	412.351	2	2	0	http://metlin.scripps.edu/metabo_list.php?mass_min=703.21&mass_max=703.51	7.31164e+06	9.56986e+06	2.40599e+06	1.7309e+06
1546	M694T309	1.73697	-3.14812	0.0898301	694.319	694.319	694.319	309.343	309.104	309.515	4	2	2	http://metlin.scripps.edu/metabo_list.php?mass_min=693.17&mass_max=693.47	1.07828e+07	1.28813e+07	8.0127e+06	5.61105e+06
1547	M416T391	1.57007	-3.10594	0.0899195	416.158	416.158	416.158	391.072	391.003	391.133	4	2	2	http://metlin.scripps.edu/metabo_list.php?mass_min=415.01&mass_max=415.31	5.65197e+07	6.6776e+07	4.43279e+07	3.42011e+07
1548	M421T700	2.30389	-5.81772	0.0900667	421.308	421.308	421.308	699.545	699.454	699.858	4	2	2	http://metlin.scripps.edu/metabo_list.php?mass_min=420.16&mass_max=420.46	9.10712e+07	9.5381e+07	4.9274e+07	3.16553e+07
1549	M633T892	2.62555	-3.12975	0.0900741	633.487	633.487	633.487	892.27	892.039	892.359	4	2	2	http://metlin.scripps.edu/metabo_list.php?mass_min=632.34&mass_max=632.64	1.34959e+07	1.81613e+07	8.11752e+06	3.93985e+06
1550	M349T774	2.45917	-5.23429	0.0903435	348.723	348.723	348.723	774.14	773.994	774.243	4	2	2	http://metlin.scripps.edu/metabo_list.php?mass_min=347.57&mass_max=347.87	7.51283e+06	8.04701e+06	4.00415e+06	2.32312e+06
1551	M796T682	3.89264	-3.55092	0.0904927	796.316	796.315	796.316	682.228	682.172	682.284	2	2	0	http://metlin.scripps.edu/metabo_list.php?mass_min=795.17&mass_max=795.47	3.33502e+06	2.66548e+06	1.30192e+06	239578
1552	M516T742	2.4678	-5.16625	0.0906231	516.392	516.391	516.392	741.539	741.396	741.707	4	2	2	http://metlin.scripps.edu/metabo_list.php?mass_min=515.24&mass_max=515.54	1.98219e+08	2.12845e+08	1.0579e+08	6.07815e+07
1553	M440T836	2.41468	-3.98936	0.0906358	440.359	440.358	440.359	836.088	835.953	836.101	4	2	2	http://metlin.scripps.edu/metabo_list.php?mass_min=439.21&mass_max=439.51	2.50226e+09	2.86272e+09	1.46121e+09	7.60616e+08
1554	M390T705	2.34797	-5.59381	0.0907221	389.78	389.78	389.78	704.694	704.53	704.759	4	2	2	http://metlin.scripps.edu/metabo_list.php?mass_min=388.63&mass_max=388.93	2.54133e+08	2.68033e+08	1.37073e+08	8.53166e+07
1555	M441T836	2.41297	-4.01107	0.0907407	441.361	441.36	441.361	836.088	835.953	836.101	4	2	2	http://metlin.scripps.edu/metabo_list.php?mass_min=440.21&mass_max=440.51	6.14513e+08	7.01711e+08	3.58354e+08	1.87124e+08
1556	M475T399	21.8044	6.96007	0.0907523	475.201	475.179	475.228	399.495	391.685	407.78	4	2	2	http://metlin.scripps.edu/metabo_list.php?mass_min=474.05&mass_max=474.35	1.36368e+07	1.23117e+07	3.21673e+08	2.44121e+08
1557	M294T763	2.29442	-4.88972	0.0907771	294.264	294.264	294.264	763.272	763.149	763.429	4	2	2	http://metlin.scripps.edu/metabo_list.php?mass_min=293.11&mass_max=293.41	9.08486e+07	9.82733e+07	5.14726e+07	3.09544e+07
1558	M416T925	2.63562	-3.21906	0.0908901	416.306	416.306	416.306	925.365	925.341	925.389	2	2	0	http://metlin.scripps.edu/metabo_list.php?mass_min=415.16&mass_max=415.46	8.4697e+06	1.15027e+07	4.97492e+06	2.60295e+06
1559	M371T390	10.0638	-6.79883	0.0910071	371.262	371.262	371.262	390.375	390.375	390.375	1	1	0	http://metlin.scripps.edu/metabo_list.php?mass_min=370.11&mass_max=370.41	6.57575e+06	5.04153e+06	637339	517024
1560	M344T761	2.42478	-4.98211	0.0910235	344.248	344.245	344.248	760.849	760.61	760.881	4	2	2	http://metlin.scripps.edu/metabo_list.php?mass_min=343.1&mass_max=343.4	1.25573e+07	1.35684e+07	6.84254e+06	3.93189e+06
1561	M343T762	2.49398	-4.85299	0.0910719	343.245	343.245	343.245	761.521	761.456	761.573	4	2	2	http://metlin.scripps.edu/metabo_list.php?mass_min=342.1&mass_max=342.4	6.72187e+07	7.31635e+07	3.62825e+07	2.00059e+07
1562	M461T534	1.96428	-5.91233	0.0910855	461.243	461.243	461.244	533.636	533.496	534.059	4	2	2	http://metlin.scripps.edu/metabo_list.php?mass_min=460.09&mass_max=460.39	1.92952e+07	2.26973e+07	1.10707e+07	1.03073e+07
1563	M369T710	2.46363	-5.03392	0.091097	368.77	368.77	368.77	709.843	709.799	709.909	4	2	2	http://metlin.scripps.edu/metabo_list.php?mass_min=367.62&mass_max=367.92	6.263e+06	6.75738e+06	3.36999e+06	1.91504e+06
1564	M370T390	7.32561	-6.18982	0.0911282	370.259	370.259	370.259	390.127	389.878	390.375	2	2	0	http://metlin.scripps.edu/metabo_list.php?mass_min=369.11&mass_max=369.41	2.96488e+07	2.2497e+07	4.22431e+06	2.89399e+06
1565	M446T694	2.34329	-5.87328	0.0911403	445.799	445.799	445.799	694.211	694.119	694.34	4	2	2	http://metlin.scripps.edu/metabo_list.php?mass_min=444.65&mass_max=444.95	3.47755e+06	3.63252e+06	1.85533e+06	1.17889e+06
1566	M485T829	2.42261	-3.91349	0.0911853	485.387	485.386	485.387	829.428	829.388	829.6	4	2	2	http://metlin.scripps.edu/metabo_list.php?mass_min=484.24&mass_max=484.54	8.29663e+08	9.54551e+08	4.86647e+08	2.49838e+08
1567	M428T775	2.43689	-4.92927	0.0911885	428.328	428.328	428.328	774.79	774.633	774.893	4	2	2	http://metlin.scripps.edu/metabo_list.php?mass_min=427.18&mass_max=427.48	2.18811e+08	2.36992e+08	1.19223e+08	6.78201e+07
1568	M201T708	1.96844	3.47302	0.0912593	201.164	201.164	201.164	707.659	706.281	709.479	4	2	2	http://metlin.scripps.edu/metabo_list.php?mass_min=200.01&mass_max=200.31	1.54567e+07	2.48847e+07	4.27728e+07	3.66367e+07
1569	M715T406	5.59992	-6.63165	0.0913759	715.35	715.35	715.35	405.987	405.987	405.987	1	1	0	http://metlin.scripps.edu/metabo_list.php?mass_min=714.2&mass_max=714.5	1.8749e+06	1.46385e+06	275355	320859
1570	M360T372	1.42588	-6.87336	0.0914831	360.045	360.044	360.045	372.337	371.897	372.863	4	2	2	http://metlin.scripps.edu/metabo_list.php?mass_min=358.89&mass_max=359.19	2.52504e+06	2.75428e+06	1.85574e+06	1.84675e+06
1571	M478T685	2.13916	-6.01202	0.0915015	477.832	477.832	477.832	684.638	684.393	684.787	4	2	2	http://metlin.scripps.edu/metabo_list.php?mass_min=476.68&mass_max=476.98	5.29215e+07	5.48614e+07	2.98668e+07	2.05188e+07
1572	M515T742	2.45948	-5.1253	0.0916733	515.389	515.388	515.389	741.859	741.396	742.04	4	2	2	http://metlin.scripps.edu/metabo_list.php?mass_min=514.24&mass_max=514.54	1.02727e+09	1.10322e+09	5.5046e+08	3.15777e+08
1573	M339T762	2.34679	-4.67271	0.0917274	339.293	339.293	339.293	761.549	761.517	761.773	4	2	2	http://metlin.scripps.edu/metabo_list.php?mass_min=338.14&mass_max=338.44	7.97035e+07	8.71074e+07	4.50914e+07	2.5989e+07
1574	M472T755	2.40426	-4.96357	0.0917354	472.357	472.357	472.358	754.678	753.602	755.697	4	2	2	http://metlin.scripps.edu/metabo_list.php?mass_min=471.21&mass_max=471.51	2.45727e+08	2.65365e+08	1.34711e+08	7.78669e+07
1575	M375T375	30.9004	6.87192	0.0917711	375.145	375.144	375.145	374.935	374.811	375.06	2	0	2	http://metlin.scripps.edu/metabo_list.php?mass_min=373.99&mass_max=374.29	2.07656e+06	1.64885e+06	6.56602e+07	4.94562e+07
1576	M542T907	2.67372	-3.14122	0.0918139	542.427	542.426	542.427	907.01	906.841	907.096	4	2	2	http://metlin.scripps.edu/metabo_list.php?mass_min=541.28&mass_max=541.58	1.24336e+09	1.69295e+09	7.36371e+08	3.61837e+08
1577	M321T762	2.35019	-4.58076	0.091845	321.264	321.263	321.264	761.521	761.456	761.573	4	2	2	http://metlin.scripps.edu/metabo_list.php?mass_min=320.11&mass_max=320.41	3.16416e+08	3.47398e+08	1.79862e+08	1.02589e+08
1578	M235T378	2.62385	-4.792	0.0918701	235.169	235.169	235.169	377.554	377.108	377.942	4	2	2	http://metlin.scripps.edu/metabo_list.php?mass_min=234.02&mass_max=234.32	1.78219e+08	2.2736e+08	8.63544e+07	6.82192e+07
1579	M914T434	3.30348	-4.07273	0.0919175	914.34	914.34	914.341	433.861	433.183	434.613	4	2	2	http://metlin.scripps.edu/metabo_list.php?mass_min=913.19&mass_max=913.49	6.63309e+07	9.04437e+07	2.96243e+07	1.78332e+07
1580	M543T907	2.64759	-3.13225	0.091948	543.429	543.428	543.429	906.899	906.768	907.064	4	2	2	http://metlin.scripps.edu/metabo_list.php?mass_min=542.28&mass_max=542.58	3.73547e+08	5.07604e+08	2.22699e+08	1.10114e+08
1581	M840T488	2.38917	-3.48421	0.0920105	840.386	840.371	840.413	488.018	487.066	488.838	4	2	2	http://metlin.scripps.edu/metabo_list.php?mass_min=839.24&mass_max=839.54	3.0226e+07	2.27765e+07	1.34766e+07	8.70784e+06
1582	M471T757	2.41425	-5.09829	0.0920223	471.354	471.354	471.355	756.725	755.813	757.296	4	2	2	http://metlin.scripps.edu/metabo_list.php?mass_min=470.2&mass_max=470.5	1.48017e+09	1.5892e+09	8.03372e+08	4.6798e+08
2317	M1120T480	Inf	4.25974	0.146792	1120.48	1120.48	1120.48	479.798	479.749	479.847	2	0	2	http://metlin.scripps.edu/metabo_list.php?mass_min=1119.33&mass_max=1119.63	0	0	3.95344e+06	2.45016e+06
1584	M886T263	2.39569	4.0362	0.0920674	886.401	886.401	886.402	262.791	262.706	262.875	2	0	2	http://metlin.scripps.edu/metabo_list.php?mass_min=885.25&mass_max=885.55	753426	1.42997e+06	2.78293e+06	2.44779e+06
1585	M690T391	270.487	6.85038	0.0920721	690.236	690.236	690.236	391.406	391.406	391.406	1	0	1	http://metlin.scripps.edu/metabo_list.php?mass_min=689.09&mass_max=689.39	0	6424.82	995247	742583
1586	M543T348	51.1577	6.86183	0.0921131	543.241	543.24	543.242	347.571	347.49	347.655	4	2	2	http://metlin.scripps.edu/metabo_list.php?mass_min=542.09&mass_max=542.39	4.42231e+06	4.89148e+06	2.72275e+08	2.04196e+08
1587	M484T829	2.42132	-3.89878	0.0921471	484.385	484.385	484.385	829.428	829.388	829.6	4	2	2	http://metlin.scripps.edu/metabo_list.php?mass_min=483.23&mass_max=483.53	3.09328e+09	3.55821e+09	1.81701e+09	9.30033e+08
1588	M239T283	4.10119	6.53003	0.0921809	239.011	239.01	239.012	283.033	282.876	283.191	2	0	2	http://metlin.scripps.edu/metabo_list.php?mass_min=237.86&mass_max=238.16	115333	129107	558882	443615
1589	M521T402	10.7329	6.83683	0.0921908	521.246	521.245	521.247	402.426	401.097	403.755	2	0	2	http://metlin.scripps.edu/metabo_list.php?mass_min=520.1&mass_max=520.4	449402	413852	5.2468e+06	4.01839e+06
1590	M211T683	2.18607	-3.07838	0.0923457	211.099	211.096	211.115	683.009	682.078	683.762	4	2	2	http://metlin.scripps.edu/metabo_list.php?mass_min=209.95&mass_max=210.25	3.08315e+06	4.00832e+06	2.04215e+06	1.20178e+06
1591	M391T705	2.38142	-5.8456	0.0923621	390.783	390.783	390.783	704.694	704.53	704.759	4	2	2	http://metlin.scripps.edu/metabo_list.php?mass_min=389.63&mass_max=389.93	2.86089e+07	2.98727e+07	1.51107e+07	9.44666e+06
1592	M496T755	1.90737	-4.44474	0.092391	495.828	495.824	495.829	755.136	754.55	755.479	3	2	1	http://metlin.scripps.edu/metabo_list.php?mass_min=494.68&mass_max=494.98	1.89308e+07	2.05653e+07	1.23028e+07	8.40431e+06
1593	M945T714	3.37362	-4.6424	0.0924245	945.455	945.455	945.455	713.577	713.344	713.706	3	2	1	http://metlin.scripps.edu/metabo_list.php?mass_min=944.31&mass_max=944.61	1.18164e+07	1.05884e+07	4.90347e+06	1.7377e+06
1594	M246T197	1.15269	6.49322	0.0924619	246.17	246.17	246.171	196.583	196.169	197.011	4	2	2	http://metlin.scripps.edu/metabo_list.php?mass_min=245.02&mass_max=245.32	855152	850264	1.00281e+06	963003
1595	M511T823	2.5048	-4.06917	0.0925778	511.384	511.384	511.384	822.626	822.515	822.778	4	2	2	http://metlin.scripps.edu/metabo_list.php?mass_min=510.23&mass_max=510.53	2.00342e+08	2.27958e+08	1.13938e+08	5.70534e+07
1596	M577T816	2.53782	-3.76323	0.0926199	577.391	577.391	577.394	815.706	815.599	815.779	4	2	2	http://metlin.scripps.edu/metabo_list.php?mass_min=576.24&mass_max=576.54	4.4329e+07	5.1822e+07	2.57178e+07	1.21694e+07
1597	M617T808	2.47091	-3.95165	0.0926388	617.465	617.465	617.465	808.409	808.325	808.565	4	2	2	http://metlin.scripps.edu/metabo_list.php?mass_min=616.32&mass_max=616.62	8.97201e+08	1.02888e+09	5.19027e+08	2.60478e+08
1598	M613T786	2.62438	-4.3479	0.0926418	613.34	613.339	613.341	785.504	785.402	786.384	4	2	2	http://metlin.scripps.edu/metabo_list.php?mass_min=612.19&mass_max=612.49	3.35687e+06	3.76018e+06	1.82067e+06	891230
1599	M404T313	1.50014	3.05206	0.0927037	404.124	404.124	404.124	312.854	306.467	319.241	2	1	1	http://metlin.scripps.edu/metabo_list.php?mass_min=402.97&mass_max=403.27	3.87444e+06	4.88039e+06	7.07817e+06	6.05529e+06
1600	M549T695	2.00612	-3.53402	0.0927503	549.285	549.285	549.285	695.469	695.308	695.54	4	2	2	http://metlin.scripps.edu/metabo_list.php?mass_min=548.13&mass_max=548.43	1.31715e+07	1.52928e+07	8.81321e+06	5.37554e+06
1601	M719T533	4.59905	3.53759	0.0927533	719.354	719.354	719.354	532.986	532.895	533.076	2	0	2	http://metlin.scripps.edu/metabo_list.php?mass_min=718.2&mass_max=718.5	94401.2	1.31729e+06	3.62281e+06	2.86964e+06
1602	M544T907	2.6764	-3.13729	0.0927956	544.431	544.43	544.431	907.08	906.957	907.174	4	2	2	http://metlin.scripps.edu/metabo_list.php?mass_min=543.28&mass_max=543.58	7.55024e+07	1.03115e+08	4.46526e+07	2.20853e+07
1603	M545T907	2.60426	-3.07567	0.092834	545.433	545.431	545.434	906.899	906.768	907.064	4	2	2	http://metlin.scripps.edu/metabo_list.php?mass_min=544.28&mass_max=544.58	1.09657e+07	1.48133e+07	6.67087e+06	3.22793e+06
1604	M616T808	2.47988	-3.9707	0.0928695	616.463	616.463	616.464	808.409	808.325	808.565	4	2	2	http://metlin.scripps.edu/metabo_list.php?mass_min=615.31&mass_max=615.61	2.68472e+09	3.07409e+09	1.54758e+09	7.74628e+08
1605	M619T808	2.45601	-4.05151	0.0929967	619.47	619.47	619.47	808.346	808.243	808.452	4	2	2	http://metlin.scripps.edu/metabo_list.php?mass_min=618.32&mass_max=618.62	3.30228e+07	3.75383e+07	1.90075e+07	9.72241e+06
1606	M456T382	12.4753	6.78588	0.0930733	456.159	456.152	456.166	382.046	372.237	391.721	4	2	2	http://metlin.scripps.edu/metabo_list.php?mass_min=455.01&mass_max=455.31	2.16179e+07	2.27344e+07	3.1415e+08	2.39156e+08
1607	M555T816	2.52651	-3.9187	0.0931583	555.41	555.41	555.41	815.649	815.462	815.712	4	2	2	http://metlin.scripps.edu/metabo_list.php?mass_min=554.26&mass_max=554.56	1.71664e+08	1.97657e+08	9.84216e+07	4.7757e+07
1608	M359T710	2.50874	-5.5558	0.0931841	359.252	359.251	359.253	710.013	709.883	710.124	4	2	2	http://metlin.scripps.edu/metabo_list.php?mass_min=358.1&mass_max=358.4	2.44948e+07	2.58456e+07	1.26725e+07	7.39344e+06
1609	M747T870	2.63505	-3.39669	0.0933254	746.53	746.51	746.534	869.78	869.73	869.926	4	2	2	http://metlin.scripps.edu/metabo_list.php?mass_min=745.38&mass_max=745.68	6.04616e+06	8.22005e+06	3.4257e+06	1.98832e+06
1610	M496T756	2.38069	-5.75533	0.093347	496.331	496.331	496.331	755.697	755.697	755.697	1	0	1	http://metlin.scripps.edu/metabo_list.php?mass_min=495.18&mass_max=495.48	8.79467e+06	9.1971e+06	4.66257e+06	2.8948e+06
1611	M772T652	2.81238	-4.79744	0.0933943	772.492	772.427	772.55	651.693	647.822	655.83	4	2	2	http://metlin.scripps.edu/metabo_list.php?mass_min=771.34&mass_max=771.64	7.34243e+06	9.46786e+06	3.36991e+06	2.60733e+06
1612	M460T781	2.7366	-5.3685	0.0934477	460.283	460.283	460.284	781.48	781.377	781.584	2	2	0	http://metlin.scripps.edu/metabo_list.php?mass_min=459.13&mass_max=459.43	6.70311e+06	7.14318e+06	3.31805e+06	1.74162e+06
1613	M508T680	2.06777	-6.75083	0.0935642	508.358	508.358	508.358	679.824	679.668	679.996	4	2	2	http://metlin.scripps.edu/metabo_list.php?mass_min=507.21&mass_max=507.51	1.45967e+08	1.46265e+08	8.18391e+07	5.94876e+07
1614	M697T771	2.5677	-5.46351	0.0935892	697.441	697.441	697.441	771.173	770.727	771.438	4	2	2	http://metlin.scripps.edu/metabo_list.php?mass_min=696.29&mass_max=696.59	4.96134e+06	5.25415e+06	2.54092e+06	1.43754e+06
1615	M541T734	2.46207	-4.38522	0.0936343	541.395	541.394	541.395	733.61	733.5	733.66	4	2	2	http://metlin.scripps.edu/metabo_list.php?mass_min=540.24&mass_max=540.54	1.9519e+08	2.16864e+08	1.0939e+08	5.79712e+07
1616	M823T469	2.75895	-3.28595	0.0936359	823.355	823.355	823.355	468.578	468.578	468.578	1	1	0	http://metlin.scripps.edu/metabo_list.php?mass_min=822.2&mass_max=822.5	5.30789e+06	3.85616e+06	2.17406e+06	1.14751e+06
1617	M558T524	2.07009	-6.09972	0.0936517	558.272	558.266	558.277	523.697	522.71	524.685	2	2	0	http://metlin.scripps.edu/metabo_list.php?mass_min=557.12&mass_max=557.42	6.59651e+06	6.40591e+06	3.68319e+06	2.59789e+06
1618	M618T808	2.48741	-3.98004	0.0936528	618.468	618.467	618.468	808.409	808.325	808.565	4	2	2	http://metlin.scripps.edu/metabo_list.php?mass_min=617.32&mass_max=617.62	2.04435e+08	2.33719e+08	1.17553e+08	5.85954e+07
1619	M542T348	49.9229	6.73812	0.0937848	542.238	542.238	542.239	347.518	347.263	347.655	4	2	2	http://metlin.scripps.edu/metabo_list.php?mass_min=541.09&mass_max=541.39	1.40771e+07	1.53092e+07	8.40202e+08	6.26843e+08
1620	M901T317	2.83852	-5.40758	0.0938458	901.275	901.275	901.275	317.243	317.243	317.243	1	1	0	http://metlin.scripps.edu/metabo_list.php?mass_min=900.13&mass_max=900.43	7.26e+06	9.15798e+06	3.14928e+06	2.6347e+06
1621	M860T536	96.4829	6.72636	0.0938788	860.37	860.369	860.37	536.048	535.964	536.131	2	0	2	http://metlin.scripps.edu/metabo_list.php?mass_min=859.22&mass_max=859.52	86005.8	134730	1.22151e+07	9.08208e+06
1622	M778T615	3.16653	-6.23619	0.0939441	778.353	778.353	778.353	614.534	614.35	614.718	2	2	0	http://metlin.scripps.edu/metabo_list.php?mass_min=777.2&mass_max=777.5	3.87601e+06	4.81934e+06	1.44415e+06	1.30186e+06
1623	M512T822	2.47583	-3.83058	0.0939473	512.388	512.388	512.388	822.488	822.415	822.519	4	2	2	http://metlin.scripps.edu/metabo_list.php?mass_min=511.24&mass_max=511.54	5.65406e+07	6.53961e+07	3.30164e+07	1.62344e+07
1624	M1312T373	2.16521	-6.0038	0.0939577	1312.49	1312.49	1312.49	372.719	372.719	372.719	1	1	0	http://metlin.scripps.edu/metabo_list.php?mass_min=1311.34&mass_max=1311.64	7.02461e+06	6.79661e+06	3.80052e+06	2.58281e+06
1625	M547T907	2.65203	-3.29869	0.0939793	547.381	547.381	547.384	907.08	906.957	907.174	4	2	2	http://metlin.scripps.edu/metabo_list.php?mass_min=546.23&mass_max=546.53	1.67806e+07	2.29323e+07	9.63192e+06	5.34256e+06
1626	M209T494	3.10647	3.29034	0.0941438	209.112	209.108	209.115	493.6	493.217	493.984	2	0	2	http://metlin.scripps.edu/metabo_list.php?mass_min=207.96&mass_max=208.26	580785	1.86249e+06	4.24328e+06	3.34668e+06
1627	M356T520	1.55997	-3.04276	0.0941671	356.123	356.122	356.123	519.731	519.39	520.028	3	1	2	http://metlin.scripps.edu/metabo_list.php?mass_min=354.97&mass_max=355.27	6.1967e+06	5.28495e+06	4.18094e+06	3.17924e+06
1628	M480T388	1.85963	-5.13115	0.0941732	480.175	480.175	480.175	387.531	387.531	387.531	1	1	0	http://metlin.scripps.edu/metabo_list.php?mass_min=479.02&mass_max=479.32	1.3786e+07	1.30766e+07	8.37945e+06	6.06575e+06
1629	M438T920	2.62205	-3.08547	0.0942395	438.352	438.351	438.352	919.842	919.774	919.886	4	2	2	http://metlin.scripps.edu/metabo_list.php?mass_min=437.2&mass_max=437.5	2.54922e+07	3.47296e+07	1.53714e+07	7.59609e+06
1630	M372T523	5.62451	6.29121	0.0942458	372.168	372.168	372.173	522.976	522.751	523.022	3	1	2	http://metlin.scripps.edu/metabo_list.php?mass_min=371.02&mass_max=371.32	2.61228e+06	3.19541e+06	1.84473e+07	1.42182e+07
1631	M680T770	1.8069	-5.97602	0.094326	680.412	680.412	680.413	770.431	770.144	770.718	2	2	0	http://metlin.scripps.edu/metabo_list.php?mass_min=679.26&mass_max=679.56	1.57594e+06	1.53301e+06	974459	746141
1632	M486T829	2.42797	-3.91044	0.0943954	486.389	486.389	486.389	829.428	829.388	829.6	4	2	2	http://metlin.scripps.edu/metabo_list.php?mass_min=485.24&mass_max=485.54	1.52527e+08	1.74779e+08	8.93589e+07	4.54478e+07
1633	M414T700	2.12034	-5.31743	0.0944737	414.271	414.271	414.271	699.817	699.817	699.817	1	1	0	http://metlin.scripps.edu/metabo_list.php?mass_min=413.12&mass_max=413.42	7.2231e+06	7.61951e+06	4.21035e+06	2.78975e+06
1634	M557T815	2.4818	-4.01632	0.094609	557.416	557.413	557.416	815.429	815.378	815.599	4	2	2	http://metlin.scripps.edu/metabo_list.php?mass_min=556.27&mass_max=556.57	1.06575e+07	1.21313e+07	6.11638e+06	3.06597e+06
1635	M764T705	2.0855	-4.86009	0.0946365	763.531	763.531	763.531	704.715	704.671	704.759	2	2	0	http://metlin.scripps.edu/metabo_list.php?mass_min=762.38&mass_max=762.68	5.39438e+06	5.78163e+06	3.24572e+06	2.11318e+06
1636	M257T286	18.1787	6.66977	0.0946588	257.165	257.165	257.165	286.108	285.935	286.76	4	2	2	http://metlin.scripps.edu/metabo_list.php?mass_min=256.02&mass_max=256.32	3.92773e+06	4.26658e+06	8.50324e+07	6.39298e+07
1637	M525T907	2.75926	-3.13008	0.0946588	525.4	525.4	525.4	906.899	906.768	907.064	4	2	2	http://metlin.scripps.edu/metabo_list.php?mass_min=524.25&mass_max=524.55	4.58542e+07	6.32904e+07	2.66745e+07	1.28813e+07
1638	M679T770	2.71659	-6.52903	0.094683	679.41	679.408	679.411	769.937	769.822	770.052	2	2	0	http://metlin.scripps.edu/metabo_list.php?mass_min=678.26&mass_max=678.56	4.72942e+06	4.80287e+06	2.21427e+06	1.29465e+06
1639	M565T703	2.23713	-5.9219	0.0947927	565.353	565.347	565.355	702.821	702.519	703.068	4	2	2	http://metlin.scripps.edu/metabo_list.php?mass_min=564.2&mass_max=564.5	8.72004e+06	9.03253e+06	4.78174e+06	3.15369e+06
1640	M205T393	2.17426	-5.32225	0.0948811	205.159	205.159	205.159	392.955	392.889	393.022	2	2	0	http://metlin.scripps.edu/metabo_list.php?mass_min=204.01&mass_max=204.31	2.37436e+07	2.88929e+07	1.2814e+07	1.13949e+07
1641	M390T324	5.52015	6.47907	0.0949652	390.179	390.179	390.179	323.559	323.377	323.742	2	0	2	http://metlin.scripps.edu/metabo_list.php?mass_min=389.03&mass_max=389.33	4.29399e+06	3.79821e+06	2.51469e+07	1.95232e+07
1642	M265T494	3.78662	3.05697	0.0949747	265.18	265.177	265.18	494.068	493.226	494.168	4	2	2	http://metlin.scripps.edu/metabo_list.php?mass_min=264.03&mass_max=264.33	3.24051e+07	1.77475e+08	4.59734e+08	3.35004e+08
1643	M413T699	2.27244	-5.47348	0.0950111	412.796	412.796	412.796	699.474	699.273	699.526	4	2	2	http://metlin.scripps.edu/metabo_list.php?mass_min=411.65&mass_max=411.95	3.65108e+07	3.83963e+07	2.01954e+07	1.27679e+07
1644	M939T841	3.85702	-3.95804	0.0950842	938.662	938.662	938.662	840.593	840.57	840.875	4	2	2	http://metlin.scripps.edu/metabo_list.php?mass_min=937.51&mass_max=937.81	1.49484e+07	2.09815e+07	6.14225e+06	3.17319e+06
1645	M573T816	2.45219	-3.7795	0.0951136	573.439	573.439	573.439	815.649	815.462	815.712	4	2	2	http://metlin.scripps.edu/metabo_list.php?mass_min=572.29&mass_max=572.59	9.42706e+08	1.09246e+09	5.55737e+08	2.74202e+08
1646	M488T661	1.33138	-3.94955	0.0951467	488.236	488.236	488.236	660.94	660.604	661.103	4	2	2	http://metlin.scripps.edu/metabo_list.php?mass_min=487.09&mass_max=487.39	1.39813e+07	1.32226e+07	1.09851e+07	9.44773e+06
1647	M843T392	9.61733	-6.15736	0.0951523	843.361	843.361	843.361	392.168	392.076	392.26	2	2	0	http://metlin.scripps.edu/metabo_list.php?mass_min=842.21&mass_max=842.51	1.6585e+07	1.24126e+07	1.82286e+06	1.19229e+06
1648	M336T318	3.03445	-5.45925	0.0952375	336.122	336.121	336.124	317.583	317.514	317.832	4	2	2	http://metlin.scripps.edu/metabo_list.php?mass_min=334.97&mass_max=335.27	1.04569e+07	1.32825e+07	4.27077e+06	3.55255e+06
1649	M682T459	6.3305	5.55728	0.0952906	682.309	682.309	682.309	459.468	459.437	459.498	2	0	2	http://metlin.scripps.edu/metabo_list.php?mass_min=681.16&mass_max=681.46	727350	1.14725e+06	5.05939e+06	6.80778e+06
1650	M271T1012	1.01911	4.20737	0.095332	271.283	271.283	271.283	1012.18	1011.9	1012.31	4	2	2	http://metlin.scripps.edu/metabo_list.php?mass_min=270.13&mass_max=270.43	1.67625e+06	1.6701e+06	1.7121e+06	1.6982e+06
1651	M299T763	2.40618	-5.06798	0.0953325	299.22	299.219	299.221	763.129	763.044	763.181	4	2	2	http://metlin.scripps.edu/metabo_list.php?mass_min=298.07&mass_max=298.37	2.23411e+07	2.39104e+07	1.21597e+07	7.06236e+06
1652	M565T453	9.91635	6.51692	0.0953623	565.258	565.256	565.259	453.158	452.081	454.234	2	0	2	http://metlin.scripps.edu/metabo_list.php?mass_min=564.11&mass_max=564.41	988506	1.19532e+06	9.33742e+06	1.23181e+07
1653	M520T705	2.16533	-5.29268	0.0953889	520.332	520.332	520.333	704.738	704.671	704.86	4	2	2	http://metlin.scripps.edu/metabo_list.php?mass_min=519.18&mass_max=519.48	2.79509e+07	2.95062e+07	1.60833e+07	1.04517e+07
1654	M212T372	1.80011	-3.71825	0.0953966	212.107	212.084	212.123	371.541	369.754	372.841	4	2	2	http://metlin.scripps.edu/metabo_list.php?mass_min=210.96&mass_max=211.26	1.50242e+07	1.33981e+07	9.38618e+06	6.40296e+06
1655	M509T680	2.03161	-6.59713	0.0956477	509.36	509.36	509.36	679.824	679.668	679.996	4	2	2	http://metlin.scripps.edu/metabo_list.php?mass_min=508.21&mass_max=508.51	2.54033e+07	2.54792e+07	1.44805e+07	1.05649e+07
1656	M517T373	1.24438	-3.88667	0.0957007	517.121	517.121	517.121	372.713	372.585	372.841	2	0	2	http://metlin.scripps.edu/metabo_list.php?mass_min=515.97&mass_max=516.27	4.29599e+06	4.1051e+06	3.18604e+06	3.56519e+06
1657	M575T816	2.45003	-3.76582	0.0959414	575.444	575.444	575.445	815.53	815.378	815.712	4	2	2	http://metlin.scripps.edu/metabo_list.php?mass_min=574.29&mass_max=574.59	3.01405e+07	3.49268e+07	1.77973e+07	8.76045e+06
1658	M651T722	2.39946	-4.27603	0.0959421	651.428	651.428	651.428	721.627	721.376	721.812	4	2	2	http://metlin.scripps.edu/metabo_list.php?mass_min=650.28&mass_max=650.58	4.00908e+07	4.46205e+07	2.29669e+07	1.23374e+07
1659	M526T907	2.78336	-3.09406	0.0960327	526.404	526.404	526.404	906.849	906.741	906.957	2	2	0	http://metlin.scripps.edu/metabo_list.php?mass_min=525.25&mass_max=525.55	1.34929e+07	1.87021e+07	7.86387e+06	3.70307e+06
1660	M283T494	3.89547	3.06082	0.0960607	283.19	283.19	283.19	494.068	493.863	494.168	4	2	2	http://metlin.scripps.edu/metabo_list.php?mass_min=282.04&mass_max=282.34	7.25111e+07	4.60264e+08	1.19869e+09	8.76726e+08
1661	M1069T683	1.68163	-4.34008	0.0961079	1068.53	1068.53	1068.53	682.808	682.707	682.909	4	2	2	http://metlin.scripps.edu/metabo_list.php?mass_min=1067.38&mass_max=1067.68	9.27994e+06	9.96767e+06	6.55332e+06	4.89246e+06
1662	M258T287	10.4547	6.56255	0.0961152	258.169	258.168	258.17	286.687	285.935	287.265	4	2	2	http://metlin.scripps.edu/metabo_list.php?mass_min=257.02&mass_max=257.32	1.2468e+06	1.32668e+06	1.53059e+07	1.15991e+07
1663	M369T486	6.83429	-5.64147	0.0961451	369.2	369.2	369.2	485.703	485.686	485.719	2	2	0	http://metlin.scripps.edu/metabo_list.php?mass_min=368.05&mass_max=368.35	3.84171e+07	2.85271e+07	5.99383e+06	3.80152e+06
1664	M313T453	5.34732	6.43587	0.096169	313.22	313.22	313.221	453.158	452.874	453.441	2	0	2	http://metlin.scripps.edu/metabo_list.php?mass_min=312.07&mass_max=312.37	684775	760212	3.37683e+06	4.34998e+06
1665	M311T444	4.51615	3.11639	0.0961927	311.183	311.183	311.188	444.348	444.191	444.846	3	1	2	http://metlin.scripps.edu/metabo_list.php?mass_min=310.03&mass_max=310.33	1.12291e+06	6.18904e+06	1.97665e+07	1.32553e+07
1666	M544T347	37.972	6.56081	0.0962271	544.243	544.243	544.243	347.408	347.327	347.49	2	0	2	http://metlin.scripps.edu/metabo_list.php?mass_min=543.09&mass_max=543.39	1.21675e+06	1.4274e+06	5.76514e+07	4.27524e+07
1667	M457T337	2.153	-4.41084	0.0962341	457.244	457.244	457.244	336.542	336.038	337.046	2	2	0	http://metlin.scripps.edu/metabo_list.php?mass_min=456.09&mass_max=456.39	1.0437e+07	8.32324e+06	4.78103e+06	3.9325e+06
1668	M608T704	2.25642	-5.18427	0.0962815	608.385	608.385	608.385	704.047	703.8	704.2	4	2	2	http://metlin.scripps.edu/metabo_list.php?mass_min=607.23&mass_max=607.53	3.56462e+07	3.78104e+07	2.00707e+07	1.24837e+07
1669	M572T816	2.445	-3.786	0.0963115	572.437	572.437	572.437	815.649	815.462	815.712	4	2	2	http://metlin.scripps.edu/metabo_list.php?mass_min=571.29&mass_max=571.59	3.01271e+09	3.48214e+09	1.77751e+09	8.78874e+08
1670	M230T683	2.3292	-3.38093	0.0963488	230.114	230.114	230.114	682.596	682.596	682.596	1	1	0	http://metlin.scripps.edu/metabo_list.php?mass_min=228.96&mass_max=229.26	2.63708e+06	3.51095e+06	1.5996e+06	1.03994e+06
1671	M501T769	2.19585	-3.39877	0.0963958	500.844	500.844	500.844	769.001	768.533	769.407	3	2	1	http://metlin.scripps.edu/metabo_list.php?mass_min=499.69&mass_max=499.99	1.42346e+06	1.69046e+06	919799	498295
1672	M603T728	2.38078	-4.47589	0.0964128	603.449	603.449	603.449	727.573	727.519	727.613	4	2	2	http://metlin.scripps.edu/metabo_list.php?mass_min=602.3&mass_max=602.6	7.2575e+08	7.97412e+08	4.11835e+08	2.27938e+08
1673	M569T900	2.80782	-3.10112	0.0964132	569.426	569.426	569.426	899.68	899.445	899.828	4	2	2	http://metlin.scripps.edu/metabo_list.php?mass_min=568.28&mass_max=568.58	3.85412e+07	5.35721e+07	2.23152e+07	1.04908e+07
1674	M318T781	2.53972	-4.7794	0.0964463	318.196	318.196	318.197	781.046	780.802	782.545	4	2	2	http://metlin.scripps.edu/metabo_list.php?mass_min=317.05&mass_max=317.35	1.49992e+07	1.6285e+07	8.03611e+06	4.28187e+06
1675	M611T390	2.92344	-2.9886	0.0966065	610.737	610.735	610.737	390.062	389.834	390.192	3	2	1	http://metlin.scripps.edu/metabo_list.php?mass_min=609.59&mass_max=609.89	1.29438e+06	1.75262e+06	766073	276192
1676	M306T432	5.37393	-3.70651	0.0966702	306.17	306.17	306.239	432.215	406.254	432.218	3	2	1	http://metlin.scripps.edu/metabo_list.php?mass_min=305.02&mass_max=305.32	2.37144e+07	1.60324e+07	1.62651e+06	5.76973e+06
1677	M442T836	2.41172	-3.96941	0.0966936	442.363	442.363	442.363	836.014	835.784	836.101	4	2	2	http://metlin.scripps.edu/metabo_list.php?mass_min=441.21&mass_max=441.51	1.02702e+08	1.16693e+08	6.00712e+07	3.0899e+07
1678	M405T405	6.78352	-5.1614	0.096757	405.025	405.025	405.025	405.026	405.026	405.026	1	1	0	http://metlin.scripps.edu/metabo_list.php?mass_min=403.88&mass_max=404.18	1.05495e+06	765740	175454	92944.7
1679	M322T468	1.91395	-6.07357	0.0968579	322.118	322.118	322.119	468.192	467.489	468.896	2	2	0	http://metlin.scripps.edu/metabo_list.php?mass_min=320.97&mass_max=321.27	2.13782e+07	2.0894e+07	1.26872e+07	9.39912e+06
1680	M301T494	4.46653	2.99766	0.0971116	301.22	301.214	301.22	493.984	493.834	494.168	3	1	2	http://metlin.scripps.edu/metabo_list.php?mass_min=300.07&mass_max=300.37	887809	6.81011e+06	2.05146e+07	1.38684e+07
1681	M413T286	8.17396	6.49146	0.0971496	413.063	413.061	413.064	285.595	285.255	285.935	2	0	2	http://metlin.scripps.edu/metabo_list.php?mass_min=411.91&mass_max=412.21	194707	204297	1.85115e+06	1.4103e+06
1682	M281T428	12.7611	-6.32326	0.0971707	281.174	281.172	281.176	427.506	427.37	427.642	2	2	0	http://metlin.scripps.edu/metabo_list.php?mass_min=280.02&mass_max=280.32	6.9974e+06	5.22342e+06	559065	398598
1683	M752T716	1.57774	-3.05027	0.0971946	752.385	752.385	752.386	715.658	715.517	715.918	4	2	2	http://metlin.scripps.edu/metabo_list.php?mass_min=751.24&mass_max=751.54	1.01028e+07	8.38568e+06	6.56232e+06	5.15599e+06
1684	M517T740	2.42847	-4.54912	0.097245	517.399	517.399	517.399	740.264	740.08	740.363	4	2	2	http://metlin.scripps.edu/metabo_list.php?mass_min=516.25&mass_max=516.55	2.20658e+07	2.4154e+07	1.23161e+07	6.71639e+06
1685	M636T893	2.36788	-2.99184	0.097308	636.429	636.416	636.434	892.597	892.373	892.681	4	2	2	http://metlin.scripps.edu/metabo_list.php?mass_min=635.28&mass_max=635.58	5.33627e+06	7.12937e+06	3.43506e+06	1.82941e+06
1686	M433T767	2.26673	-6.15833	0.0973548	432.814	432.807	432.824	767.048	766.084	767.491	3	1	2	http://metlin.scripps.edu/metabo_list.php?mass_min=431.66&mass_max=431.96	1.92077e+07	1.96462e+07	1.03197e+07	6.82125e+06
1687	M310T682	2.59668	-3.7661	0.0974026	310.119	310.118	310.129	682.438	681.971	682.506	4	2	2	http://metlin.scripps.edu/metabo_list.php?mass_min=308.97&mass_max=309.27	4.16812e+07	5.58029e+07	2.24419e+07	1.50998e+07
1688	M378T787	2.6841	-4.91638	0.0974662	377.754	377.753	377.754	787.373	787.349	787.487	4	2	2	http://metlin.scripps.edu/metabo_list.php?mass_min=376.6&mass_max=376.9	2.10489e+06	2.2732e+06	1.08195e+06	549165
1689	M602T728	2.38539	-4.44935	0.0975462	602.448	602.447	602.448	727.573	727.519	727.613	4	2	2	http://metlin.scripps.edu/metabo_list.php?mass_min=601.3&mass_max=601.6	2.2505e+09	2.47312e+09	1.27761e+09	7.02618e+08
1690	M457T920	2.61443	-3.01023	0.0975557	457.382	457.382	457.382	919.774	919.557	919.855	3	2	1	http://metlin.scripps.edu/metabo_list.php?mass_min=456.23&mass_max=456.53	5.14233e+06	7.03863e+06	3.14317e+06	1.51596e+06
1691	M327T766	1.13004	2.96257	0.0975616	327.337	327.337	327.337	765.594	765.43	765.758	2	0	2	http://metlin.scripps.edu/metabo_list.php?mass_min=326.19&mass_max=326.49	2.91586e+06	2.74118e+06	3.1081e+06	3.28456e+06
1692	M604T728	2.3936	-4.46219	0.0976575	604.452	604.452	604.452	727.573	727.519	727.613	4	2	2	http://metlin.scripps.edu/metabo_list.php?mass_min=603.3&mass_max=603.6	1.62621e+08	1.78595e+08	9.20553e+07	5.04983e+07
1693	M338T762	2.32814	-4.55517	0.0977318	338.29	338.29	338.29	761.521	761.456	761.573	4	2	2	http://metlin.scripps.edu/metabo_list.php?mass_min=337.14&mass_max=337.44	4.26757e+08	4.65439e+08	2.44024e+08	1.39198e+08
1694	M412T925	2.59908	-3.04694	0.097761	412.353	412.353	412.353	925.21	925.013	925.389	4	2	2	http://metlin.scripps.edu/metabo_list.php?mass_min=411.2&mass_max=411.5	1.81596e+07	2.49117e+07	1.10267e+07	5.54509e+06
1695	M605T728	2.37	-4.32445	0.0977946	605.455	605.455	605.455	727.573	727.519	727.613	4	2	2	http://metlin.scripps.edu/metabo_list.php?mass_min=604.3&mass_max=604.6	2.58179e+07	2.85553e+07	1.48376e+07	8.10464e+06
1696	M625T320	45.4383	6.06218	0.0978928	625.382	625.382	625.382	319.855	319.817	319.892	2	0	2	http://metlin.scripps.edu/metabo_list.php?mass_min=624.23&mass_max=624.53	0	186423	4.91227e+06	3.55849e+06
1697	M743T480	3.00711	3.00573	0.0979154	743.361	743.361	743.361	480.112	480.063	480.161	2	0	2	http://metlin.scripps.edu/metabo_list.php?mass_min=742.21&mass_max=742.51	676306	2.06991e+06	4.72507e+06	3.53311e+06
1698	M505T661	1.32194	-3.98433	0.0979769	505.243	505.243	505.243	660.649	660.525	660.767	4	2	2	http://metlin.scripps.edu/metabo_list.php?mass_min=504.09&mass_max=504.39	1.90671e+07	1.81031e+07	1.50877e+07	1.30304e+07
1699	M589T900	2.62354	-3.00521	0.0979959	589.46	589.46	589.46	899.816	899.544	899.828	3	2	1	http://metlin.scripps.edu/metabo_list.php?mass_min=588.31&mass_max=588.61	1.24833e+07	1.71186e+07	7.6209e+06	3.66225e+06
1700	M288T193	6.74912	-5.94787	0.0980352	288.217	288.217	288.217	193.103	193.053	193.153	2	2	0	http://metlin.scripps.edu/metabo_list.php?mass_min=287.07&mass_max=287.37	7.63137e+06	5.73959e+06	1.13904e+06	842098
1701	M456T920	2.56858	-3.00438	0.0980618	456.379	456.379	456.379	919.842	919.774	919.886	4	2	2	http://metlin.scripps.edu/metabo_list.php?mass_min=455.23&mass_max=455.53	4.12812e+07	5.638e+07	2.54544e+07	1.25671e+07
1702	M238T580	1.81884	4.2127	0.0980636	238.185	238.185	238.185	579.884	579.657	580.111	2	0	2	http://metlin.scripps.edu/metabo_list.php?mass_min=237.03&mass_max=237.33	2.89002e+06	3.36517e+06	6.24816e+06	5.129e+06
1703	M884T957	1.024	-2.95431	0.0983205	883.582	883.582	883.582	956.96	956.773	957.233	4	2	2	http://metlin.scripps.edu/metabo_list.php?mass_min=882.43&mass_max=882.73	7.75421e+06	7.66991e+06	7.57564e+06	7.48692e+06
1704	M410T925	2.55212	-3.02689	0.0983449	410.348	410.348	410.348	925.126	925.013	925.23	4	2	2	http://metlin.scripps.edu/metabo_list.php?mass_min=409.2&mass_max=409.5	5.19994e+08	7.11173e+08	3.19693e+08	1.62717e+08
1705	M233T715	1.7442	-3.86261	0.098395	233.153	233.153	233.153	714.833	714.598	714.882	3	2	1	http://metlin.scripps.edu/metabo_list.php?mass_min=232&mass_max=232.3	8.86965e+07	1.08217e+08	6.1246e+07	5.16502e+07
1706	M1272T489	1.84647	-2.99134	0.0984774	1272.49	1272.49	1272.49	488.824	488.809	488.838	2	2	0	http://metlin.scripps.edu/metabo_list.php?mass_min=1271.34&mass_max=1271.64	1.16088e+07	9.49801e+06	6.94095e+06	4.48994e+06
1707	M815T469	2.13279	-5.81129	0.0987864	815.364	815.364	815.364	469.465	469.214	469.717	2	2	0	http://metlin.scripps.edu/metabo_list.php?mass_min=814.21&mass_max=814.51	1.85414e+07	1.79729e+07	1.02045e+07	6.91596e+06
1708	M909T371	1.70036	-6.07926	0.0989384	909.383	909.383	909.383	371.326	371.326	371.326	1	0	1	http://metlin.scripps.edu/metabo_list.php?mass_min=908.23&mass_max=908.53	4.16748e+06	4.7685e+06	2.59116e+06	2.6642e+06
1709	M917T714	4.11695	-4.95728	0.0989713	917.468	917.467	917.468	713.577	713.344	713.706	3	2	1	http://metlin.scripps.edu/metabo_list.php?mass_min=916.32&mass_max=916.62	8.91953e+06	1.1976e+07	2.99657e+06	2.07893e+06
1710	M574T816	2.45123	-3.77147	0.0990182	574.442	574.441	574.442	815.53	815.378	815.712	4	2	2	http://metlin.scripps.edu/metabo_list.php?mass_min=573.29&mass_max=573.59	2.01622e+08	2.32495e+08	1.18927e+08	5.81747e+07
1711	M529T823	2.41629	-3.82386	0.0990198	529.413	529.413	529.413	822.626	822.515	822.778	4	2	2	http://metlin.scripps.edu/metabo_list.php?mass_min=528.26&mass_max=528.56	9.34968e+08	1.07169e+09	5.53003e+08	2.77469e+08
1712	M437T920	2.61182	-3.01467	0.0990471	437.347	437.347	437.348	919.871	919.829	920.098	4	2	2	http://metlin.scripps.edu/metabo_list.php?mass_min=436.2&mass_max=436.5	1.0347e+08	1.42377e+08	6.30249e+07	3.11035e+07
1713	M461T769	2.84995	-2.94356	0.099094	460.765	460.765	460.765	769.001	769.001	769.001	1	0	1	http://metlin.scripps.edu/metabo_list.php?mass_min=459.62&mass_max=459.92	2.25144e+06	1.62778e+06	973341	387810
1714	M222T536	1.90302	4.62215	0.0991368	222.184	222.184	222.184	535.964	535.964	535.964	1	0	1	http://metlin.scripps.edu/metabo_list.php?mass_min=221.03&mass_max=221.33	955267	1.08705e+06	2.13159e+06	1.75498e+06
1715	M231T288	6.61907	-6.3403	0.0991377	231.079	231.019	231.138	287.504	283.217	291.791	2	1	1	http://metlin.scripps.edu/metabo_list.php?mass_min=229.93&mass_max=230.23	3.22831e+07	3.19665e+07	555005	9.15174e+06
1716	M487T829	2.43674	-3.97532	0.0992151	487.392	487.392	487.392	829.428	829.388	829.6	4	2	2	http://metlin.scripps.edu/metabo_list.php?mass_min=486.24&mass_max=486.54	2.02038e+07	2.28882e+07	1.17423e+07	5.94197e+06
1717	M721T313	6.94453	4.68192	0.0992248	721.385	721.385	721.385	312.56	312.56	312.56	1	0	1	http://metlin.scripps.edu/metabo_list.php?mass_min=720.24&mass_max=720.54	154964	369282	2.13541e+06	1.50523e+06
1718	M528T823	2.41692	-3.82526	0.0992744	528.411	528.411	528.411	822.755	822.519	822.835	4	2	2	http://metlin.scripps.edu/metabo_list.php?mass_min=527.26&mass_max=527.56	3.21601e+09	3.68464e+09	1.90161e+09	9.5353e+08
1719	M855T712	2.30085	-3.47209	0.0993182	855.45	855.45	855.451	712.025	711.461	712.447	4	2	2	http://metlin.scripps.edu/metabo_list.php?mass_min=854.3&mass_max=854.6	4.77961e+06	6.34209e+06	2.87468e+06	1.95906e+06
1720	M741T311	2.98391	2.92959	0.0994406	741.327	741.327	741.327	310.988	310.917	311.059	2	0	2	http://metlin.scripps.edu/metabo_list.php?mass_min=740.18&mass_max=740.48	1.35671e+06	3.85544e+06	9.02275e+06	6.52981e+06
1721	M940T841	4.04927	-3.98475	0.0994778	939.666	939.665	939.666	840.593	840.57	840.875	4	2	2	http://metlin.scripps.edu/metabo_list.php?mass_min=938.52&mass_max=938.82	7.46955e+06	1.0567e+07	2.93846e+06	1.51583e+06
1722	M530T823	2.42671	-3.81481	0.0995026	530.415	530.415	530.416	822.626	822.515	822.778	4	2	2	http://metlin.scripps.edu/metabo_list.php?mass_min=529.27&mass_max=529.57	1.86233e+08	2.13577e+08	1.09986e+08	5.47685e+07
1723	M478T403	3.07909	-5.6212	0.0995226	478.226	478.226	478.226	403.428	403.428	403.428	1	1	0	http://metlin.scripps.edu/metabo_list.php?mass_min=477.08&mass_max=477.38	3.15757e+07	2.49177e+07	9.82997e+06	8.51744e+06
1724	M318T164	4.09072	3.24284	0.0995687	318.228	318.228	318.228	163.935	163.773	164.097	2	0	2	http://metlin.scripps.edu/metabo_list.php?mass_min=317.08&mass_max=317.38	1.04852e+06	3.40794e+06	1.0881e+07	7.34916e+06
1725	M375T447	8.2577	-6.00491	0.0996272	375.138	375.131	375.145	446.852	437.784	455.748	4	2	2	http://metlin.scripps.edu/metabo_list.php?mass_min=373.99&mass_max=374.29	8.739e+07	1.17072e+08	1.42858e+07	1.04744e+07
1726	M881T409	17.8052	-6.18419	0.0996928	881.321	881.321	881.321	409.317	409.085	409.549	2	2	0	http://metlin.scripps.edu/metabo_list.php?mass_min=880.17&mass_max=880.47	4.00322e+07	2.94634e+07	2.39815e+06	1.50496e+06
1727	M230T414	3.61479	-5.98133	0.0996947	230.122	230.121	230.123	413.889	413.651	414.127	2	2	0	http://metlin.scripps.edu/metabo_list.php?mass_min=228.97&mass_max=229.27	6.1493e+06	4.83267e+06	1.60619e+06	1.43188e+06
1728	M453T391	56.3247	6.2403	0.0997117	453.149	453.149	453.149	391.072	391.052	391.091	2	0	2	http://metlin.scripps.edu/metabo_list.php?mass_min=452&mass_max=452.3	87228.7	22928.1	3.58953e+06	2.61503e+06
1729	M377T455	6.47153	-5.66984	0.0997704	377.135	377.134	377.136	454.932	454.795	455.069	2	2	0	http://metlin.scripps.edu/metabo_list.php?mass_min=375.99&mass_max=376.29	2.3593e+06	3.16969e+06	351331	503025
1730	M457T401	8.27719	6.32559	0.0998097	457.196	457.17	457.222	400.895	391.685	410.207	4	2	2	http://metlin.scripps.edu/metabo_list.php?mass_min=456.05&mass_max=456.35	9.36315e+06	9.2709e+06	8.78373e+07	6.64002e+07
1731	M218T282	2.72096	-4.43811	0.0998171	218.162	218.162	218.162	281.576	281.576	281.576	1	1	0	http://metlin.scripps.edu/metabo_list.php?mass_min=217.01&mass_max=217.31	8.44066e+06	1.10398e+07	4.06749e+06	3.09193e+06
1732	M311T795	1.61995	-3.10956	0.100017	311.126	311.126	311.126	795.386	795.386	795.386	1	0	1	http://metlin.scripps.edu/metabo_list.php?mass_min=309.98&mass_max=310.28	2.93819e+06	3.39895e+06	1.64134e+06	2.2706e+06
1733	M587T900	2.65402	-3.00098	0.100032	587.455	587.455	587.455	899.822	899.777	899.867	4	2	2	http://metlin.scripps.edu/metabo_list.php?mass_min=586.3&mass_max=586.6	3.73256e+08	5.16388e+08	2.26012e+08	1.09194e+08
1734	M455T920	2.52281	-2.97035	0.10006	455.376	455.376	455.377	919.842	919.774	919.886	4	2	2	http://metlin.scripps.edu/metabo_list.php?mass_min=454.23&mass_max=454.53	2.4141e+08	3.298e+08	1.5083e+08	7.55883e+07
1735	M218T492	3.67021	-4.81498	0.100097	218.162	218.162	218.162	492.423	492.253	492.592	2	2	0	http://metlin.scripps.edu/metabo_list.php?mass_min=217.01&mass_max=217.31	6.69312e+06	8.94767e+06	2.48509e+06	1.77646e+06
1736	M536T684	1.32196	-2.92158	0.10013	536.223	536.213	536.227	683.55	683.109	684.161	4	2	2	http://metlin.scripps.edu/metabo_list.php?mass_min=535.07&mass_max=535.37	9.37277e+06	8.35112e+06	7.2373e+06	6.16994e+06
1737	M411T925	2.55436	-3.00752	0.100155	411.351	411.35	411.351	925.126	925.013	925.23	4	2	2	http://metlin.scripps.edu/metabo_list.php?mass_min=410.2&mass_max=410.5	1.21831e+08	1.67355e+08	7.49851e+07	3.82276e+07
1738	M577T535	1.83181	-4.71738	0.100222	577.176	577.174	577.177	535.493	535.485	535.717	3	2	1	http://metlin.scripps.edu/metabo_list.php?mass_min=576.03&mass_max=576.33	2.54813e+06	3.06111e+06	1.44682e+06	1.61531e+06
1739	M361T166	1.92047	-6.28853	0.100261	361.08	361.08	361.08	166.152	166.152	166.152	1	1	0	http://metlin.scripps.edu/metabo_list.php?mass_min=359.93&mass_max=360.23	8.70937e+06	1.01462e+07	4.89473e+06	4.92348e+06
1740	M454T920	2.53588	-2.97579	0.100318	454.374	454.374	454.374	919.842	919.774	919.886	4	2	2	http://metlin.scripps.edu/metabo_list.php?mass_min=453.22&mass_max=453.52	9.38043e+08	1.2847e+09	5.83593e+08	2.92924e+08
1741	M817T412	79.8016	-6.26358	0.100334	817.46	817.459	817.46	412.106	412.027	412.184	2	2	0	http://metlin.scripps.edu/metabo_list.php?mass_min=816.31&mass_max=816.61	2.13032e+06	1.55044e+06	33760.7	12363.2
1742	M486T685	1.92702	-6.25261	0.100373	486.346	486.346	486.346	684.748	684.603	684.989	4	2	2	http://metlin.scripps.edu/metabo_list.php?mass_min=485.2&mass_max=485.5	2.63293e+08	2.64998e+08	1.57379e+08	1.16769e+08
1743	M368T710	2.38649	-5.27952	0.100509	367.766	367.766	367.766	710.013	709.883	710.124	4	2	2	http://metlin.scripps.edu/metabo_list.php?mass_min=366.62&mass_max=366.92	6.62113e+07	6.97292e+07	3.57511e+07	2.12113e+07
1744	M266T494	3.62034	2.97541	0.100517	266.18	266.168	266.182	494.227	493.851	494.826	4	2	2	http://metlin.scripps.edu/metabo_list.php?mass_min=265.03&mass_max=265.33	6.32689e+06	3.27379e+07	8.17367e+07	5.96909e+07
1745	M211T269	2.62645	-4.66872	0.100536	211.103	211.101	211.107	268.791	268.459	269.03	3	2	1	http://metlin.scripps.edu/metabo_list.php?mass_min=209.95&mass_max=210.25	3.76896e+06	4.85374e+06	1.8227e+06	1.46031e+06
1746	M234T715	1.76026	-3.89112	0.100587	234.157	234.155	234.157	714.598	714.519	714.882	3	2	1	http://metlin.scripps.edu/metabo_list.php?mass_min=233.01&mass_max=233.31	1.44231e+07	1.76419e+07	9.86741e+06	8.34868e+06
1747	M793T431	2.69269	3.10647	0.100594	793.374	793.352	793.392	431.084	424.137	451.531	4	2	2	http://metlin.scripps.edu/metabo_list.php?mass_min=792.22&mass_max=792.52	1.95783e+07	3.80489e+07	9.02827e+07	6.48892e+07
1748	M398T318	3.15504	-4.33273	0.100639	398.146	398.145	398.147	318.012	317.876	318.149	2	2	0	http://metlin.scripps.edu/metabo_list.php?mass_min=397&mass_max=397.3	4.01626e+06	5.40015e+06	1.76085e+06	1.22371e+06
1749	M592T900	2.26218	-2.99283	0.100828	592.405	592.398	592.407	899.867	899.816	900.148	3	2	1	http://metlin.scripps.edu/metabo_list.php?mass_min=591.25&mass_max=591.55	5.27748e+06	7.06559e+06	3.45231e+06	2.00396e+06
1750	M368T929	2.65231	-2.9884	0.100877	368.327	368.327	368.327	929.304	929.191	929.318	3	2	1	http://metlin.scripps.edu/metabo_list.php?mass_min=367.18&mass_max=367.48	4.8022e+06	6.65491e+06	2.91347e+06	1.4062e+06
1751	M955T714	1.91256	-3.38325	0.100981	955.423	955.423	955.423	714.402	714.249	714.651	4	2	2	http://metlin.scripps.edu/metabo_list.php?mass_min=954.27&mass_max=954.57	2.13994e+07	1.84963e+07	1.28398e+07	8.02008e+06
1752	M957T684	4.50963	-4.20636	0.101053	956.664	956.664	956.664	683.735	683.535	683.762	3	2	1	http://metlin.scripps.edu/metabo_list.php?mass_min=955.51&mass_max=955.81	4.05851e+06	5.73661e+06	1.4282e+06	743845
1753	M598T610	36.7337	6.23581	0.101076	598.269	598.265	598.286	610.409	607.874	611	4	2	2	http://metlin.scripps.edu/metabo_list.php?mass_min=597.12&mass_max=597.42	3.88919e+06	3.04057e+06	1.47128e+08	1.07427e+08
1754	M822T966	1.04392	-4.39136	0.101126	822.443	822.442	822.443	965.761	965.578	965.969	4	2	2	http://metlin.scripps.edu/metabo_list.php?mass_min=821.29&mass_max=821.59	5.36223e+06	5.4593e+06	5.16492e+06	5.20135e+06
1755	M586T900	2.65881	-2.98037	0.101218	586.453	586.452	586.453	899.822	899.777	899.867	4	2	2	http://metlin.scripps.edu/metabo_list.php?mass_min=585.3&mass_max=585.6	1.14885e+09	1.59376e+09	6.9719e+08	3.3433e+08
1756	M424T560	1.89389	-5.9122	0.101307	424.19	424.174	424.206	560.11	552.879	567.004	4	2	2	http://metlin.scripps.edu/metabo_list.php?mass_min=423.04&mass_max=423.34	9.24513e+06	9.06069e+06	5.55771e+06	4.10799e+06
1757	M322T318	3.31026	-5.34056	0.101347	322.115	322.115	322.115	317.854	317.832	317.876	2	2	0	http://metlin.scripps.edu/metabo_list.php?mass_min=320.97&mass_max=321.27	9.95824e+06	1.28675e+07	3.77704e+06	3.11842e+06
1758	M227T709	1.12261	3.86591	0.101365	227.2	227.2	227.2	708.897	708.611	709.153	4	2	2	http://metlin.scripps.edu/metabo_list.php?mass_min=226.05&mass_max=226.35	6.175e+06	5.83072e+06	6.8202e+06	6.65755e+06
1759	M955T684	4.45034	-4.3332	0.101382	954.655	954.655	954.656	683.748	683.535	683.969	4	2	2	http://metlin.scripps.edu/metabo_list.php?mass_min=953.51&mass_max=953.81	2.59415e+07	3.63467e+07	8.99398e+06	5.00229e+06
1760	M547T282	22.174	6.05593	0.101383	547.054	547.054	547.055	282.176	282.158	282.193	2	0	2	http://metlin.scripps.edu/metabo_list.php?mass_min=545.9&mass_max=546.2	48939.2	94816.5	1.84408e+06	1.34355e+06
1761	M599T611	24.9267	6.18847	0.101384	599.269	599.269	599.269	610.795	610.59	611	2	0	2	http://metlin.scripps.edu/metabo_list.php?mass_min=598.12&mass_max=598.42	2.14694e+06	1.54074e+06	5.30833e+07	3.88383e+07
1762	M721T523	7.14477	5.82509	0.101386	721.347	721.347	721.347	522.999	522.976	523.022	2	0	2	http://metlin.scripps.edu/metabo_list.php?mass_min=720.2&mass_max=720.5	1.79492e+06	2.43023e+06	1.72996e+07	1.28881e+07
1763	M460T345	2.06545	2.9167	0.101408	460.263	460.263	460.263	344.585	344.583	344.719	3	1	2	http://metlin.scripps.edu/metabo_list.php?mass_min=459.11&mass_max=459.41	2.48413e+06	4.33259e+06	7.87406e+06	6.20556e+06
1764	M817T481	3.19613	3.00097	0.10144	817.368	817.342	817.385	480.972	480.693	481.491	4	2	2	http://metlin.scripps.edu/metabo_list.php?mass_min=816.22&mass_max=816.52	3.24316e+06	1.19702e+07	2.77683e+07	2.08554e+07
1765	M560T223	85.2106	-6.10776	0.101547	560.247	560.247	560.247	222.741	222.741	222.741	1	1	0	http://metlin.scripps.edu/metabo_list.php?mass_min=559.1&mass_max=559.4	1.39214e+06	1.92792e+06	38963	0
1766	M459T920	2.49407	-3.01895	0.101581	459.329	459.329	459.33	920.196	920.098	920.496	4	2	2	http://metlin.scripps.edu/metabo_list.php?mass_min=458.18&mass_max=458.48	2.80305e+07	3.84594e+07	1.73703e+07	9.28893e+06
1767	M351T83	1.22768	-4.43423	0.101595	350.89	350.888	350.893	83.2084	82.759	83.5746	3	1	2	http://metlin.scripps.edu/metabo_list.php?mass_min=349.74&mass_max=350.04	706273	652880	543792	563298
1768	M523T827	3.39113	-4.44948	0.101616	523.347	523.343	523.353	827.479	827.038	827.861	4	2	2	http://metlin.scripps.edu/metabo_list.php?mass_min=522.2&mass_max=522.5	5.15218e+07	6.95602e+07	2.11238e+07	1.45818e+07
1769	M503T782	1.42733	-2.89267	0.101671	503.286	503.286	503.286	782.342	782.342	782.342	1	1	0	http://metlin.scripps.edu/metabo_list.php?mass_min=502.14&mass_max=502.44	5.55114e+07	6.4379e+07	4.63381e+07	3.76582e+07
1770	M482T914	2.78874	-3.14081	0.101683	482.378	482.376	482.378	914.042	913.589	914.519	4	2	2	http://metlin.scripps.edu/metabo_list.php?mass_min=481.23&mass_max=481.53	1.61938e+07	2.27141e+07	9.24644e+06	4.70537e+06
1771	M384T790	2.48687	-4.50791	0.10169	384.29	384.29	384.291	790.028	789.912	790.391	4	2	2	http://metlin.scripps.edu/metabo_list.php?mass_min=383.14&mass_max=383.44	1.73488e+07	1.89498e+07	9.56819e+06	5.02789e+06
1772	M1048T683	1.46615	-2.98911	0.101735	1048.46	1048.46	1048.46	682.808	682.707	682.909	4	2	2	http://metlin.scripps.edu/metabo_list.php?mass_min=1047.31&mass_max=1047.61	5.99513e+07	7.08232e+07	4.89365e+07	4.02596e+07
1773	M612T661	4.38924	6.17941	0.102106	612.288	612.287	612.289	661.487	661.196	661.778	2	0	2	http://metlin.scripps.edu/metabo_list.php?mass_min=611.14&mass_max=611.44	1.50437e+06	1.48852e+06	7.38899e+06	5.74754e+06
1774	M385T756	2.25998	-5.10558	0.102142	385.323	385.322	385.324	756.41	756.335	756.446	4	2	2	http://metlin.scripps.edu/metabo_list.php?mass_min=384.17&mass_max=384.47	3.37813e+06	3.56672e+06	1.90376e+06	1.16922e+06
1775	M206T344	1.87261	-6.17601	0.102183	206.085	206.083	206.088	343.963	340.239	352.601	4	2	2	http://metlin.scripps.edu/metabo_list.php?mass_min=204.93&mass_max=205.23	1.92672e+06	1.92822e+06	1.17472e+06	883865
1776	M893T818	1.42643	6.1492	0.102214	892.542	892.542	892.542	817.78	817.646	817.914	2	0	2	http://metlin.scripps.edu/metabo_list.php?mass_min=891.39&mass_max=891.69	656829	653634	889232	980053
1777	M455T755	3.23605	-4.07028	0.102292	455.318	455.318	455.319	754.542	754.508	754.745	4	2	2	http://metlin.scripps.edu/metabo_list.php?mass_min=454.17&mass_max=454.47	1.29129e+08	1.76937e+08	5.74647e+07	3.71156e+07
1778	M398T705	2.29431	-5.49987	0.102489	398.293	398.293	398.293	704.738	704.671	704.86	4	2	2	http://metlin.scripps.edu/metabo_list.php?mass_min=397.14&mass_max=397.44	5.78448e+08	6.01216e+08	3.16505e+08	1.97665e+08
1779	M481T914	2.69448	-3.02968	0.102521	481.374	481.373	481.374	913.72	913.589	913.867	4	2	2	http://metlin.scripps.edu/metabo_list.php?mass_min=480.22&mass_max=480.52	5.97094e+07	8.34336e+07	3.55063e+07	1.76183e+07
1780	M722T523	8.53239	5.76674	0.102532	722.35	722.35	722.35	523.159	523.022	523.296	2	0	2	http://metlin.scripps.edu/metabo_list.php?mass_min=721.2&mass_max=721.5	680422	988935	8.20107e+06	6.04253e+06
1781	M348T311	1.88669	-2.97568	0.102611	348.17	348.17	348.17	310.604	310.394	310.813	2	2	0	http://metlin.scripps.edu/metabo_list.php?mass_min=347.02&mass_max=347.32	1.7381e+07	2.22816e+07	1.2462e+07	8.56023e+06
1782	M310T850	2.08356	-4.23533	0.102619	310.287	310.287	310.29	849.55	849.502	849.715	3	2	1	http://metlin.scripps.edu/metabo_list.php?mass_min=309.14&mass_max=309.44	2.27589e+06	2.49011e+06	1.41601e+06	871421
1783	M268T683	2.39738	-3.13068	0.102672	268.116	268.116	268.116	682.54	682.484	682.596	2	2	0	http://metlin.scripps.edu/metabo_list.php?mass_min=266.97&mass_max=267.27	1.65252e+06	2.25009e+06	1.02061e+06	607253
1784	M240T285	8.17533	6.14373	0.102673	240.161	240.161	240.161	285.428	285.258	285.597	2	0	2	http://metlin.scripps.edu/metabo_list.php?mass_min=239.01&mass_max=239.31	805941	828425	7.63507e+06	5.72641e+06
1785	M470T746	2.3937	-4.4902	0.102851	470.369	470.369	470.369	745.65	745.589	745.673	4	2	2	http://metlin.scripps.edu/metabo_list.php?mass_min=469.22&mass_max=469.52	2.60465e+09	2.83686e+09	1.46977e+09	8.03491e+08
1786	M589T274	1.93258	5.09453	0.102915	589.255	589.252	589.259	273.937	273.696	274.246	4	2	2	http://metlin.scripps.edu/metabo_list.php?mass_min=588.11&mass_max=588.41	4.38266e+07	4.00595e+07	8.85015e+07	7.3615e+07
1787	M225T739	1.17345	6.12642	0.102998	225.038	225.035	225.039	738.905	738.663	739.381	4	2	2	http://metlin.scripps.edu/metabo_list.php?mass_min=223.89&mass_max=224.19	1.00842e+06	1.00816e+06	1.15463e+06	1.21172e+06
1788	M603T495	4.75251	2.87169	0.103014	603.336	603.336	603.336	494.931	494.931	494.931	1	0	1	http://metlin.scripps.edu/metabo_list.php?mass_min=602.19&mass_max=602.49	39694.7	829341	2.4731e+06	1.657e+06
1789	M762T480	24.1279	6.03232	0.103018	762.345	762.337	762.354	479.798	477.994	480.495	4	2	2	http://metlin.scripps.edu/metabo_list.php?mass_min=761.2&mass_max=761.5	4.11598e+06	7.02303e+06	1.55684e+08	1.13077e+08
1790	M728T570	5.65352	-4.40895	0.103336	728.39	728.39	728.39	569.882	569.846	569.919	2	2	0	http://metlin.scripps.edu/metabo_list.php?mass_min=727.24&mass_max=727.54	3.99676e+06	5.70065e+06	1.1636e+06	551689
1791	M590T274	1.95534	5.14247	0.103339	590.258	590.255	590.262	273.937	273.696	274.246	4	2	2	http://metlin.scripps.edu/metabo_list.php?mass_min=589.11&mass_max=589.41	1.59818e+07	1.46409e+07	3.27032e+07	2.71746e+07
1792	M484T391	12.1247	6.09552	0.103406	484.207	484.202	484.215	390.556	390.192	391.091	4	2	2	http://metlin.scripps.edu/metabo_list.php?mass_min=483.06&mass_max=483.36	5.38212e+06	5.75234e+06	7.76601e+07	5.73424e+07
1793	M417T391	1.54107	-2.86935	0.10356	417.161	417.161	417.162	390.756	390.69	391.133	4	2	2	http://metlin.scripps.edu/metabo_list.php?mass_min=416.01&mass_max=416.31	1.3605e+07	1.60862e+07	1.09603e+07	8.30641e+06
1794	M563T734	2.47352	-4.53367	0.103634	563.375	563.375	563.375	733.61	733.5	733.66	4	2	2	http://metlin.scripps.edu/metabo_list.php?mass_min=562.23&mass_max=562.53	4.20195e+07	4.56971e+07	2.31928e+07	1.22694e+07
1795	M345T403	19.9014	6.07955	0.103712	345.135	345.135	345.135	403.462	403.419	403.505	2	0	2	http://metlin.scripps.edu/metabo_list.php?mass_min=343.99&mass_max=344.29	761324	834501	1.836e+07	1.33991e+07
1796	M720T433	2.76242	-4.14185	0.103724	720.335	720.335	720.336	432.55	432.281	433.183	3	1	2	http://metlin.scripps.edu/metabo_list.php?mass_min=719.19&mass_max=719.49	8.36914e+06	1.11583e+07	4.09757e+06	2.9714e+06
1797	M1288T489	3.11775	-3.54792	0.103857	1288.46	1288.46	1288.46	488.838	488.838	488.838	1	1	0	http://metlin.scripps.edu/metabo_list.php?mass_min=1287.31&mass_max=1287.61	1.52585e+07	1.08475e+07	5.36175e+06	3.01159e+06
1798	M725T877	2.97709	-3.08483	0.103863	725.491	725.491	725.491	877.339	877.339	877.339	1	1	0	http://metlin.scripps.edu/metabo_list.php?mass_min=724.34&mass_max=724.64	1.45706e+06	2.0796e+06	813139	374815
1799	M588T900	2.65717	-2.95228	0.103929	588.458	588.457	588.458	899.822	899.777	899.867	4	2	2	http://metlin.scripps.edu/metabo_list.php?mass_min=587.31&mass_max=587.61	8.00947e+07	1.11802e+08	4.87381e+07	2.34803e+07
1800	M498T914	2.60564	-2.97867	0.103984	498.4	498.4	498.401	913.807	913.693	913.913	4	2	2	http://metlin.scripps.edu/metabo_list.php?mass_min=497.25&mass_max=497.55	1.18263e+09	1.64558e+09	7.21601e+08	3.63819e+08
1801	M691T968	1.05032	-5.2119	0.103991	691.308	691.307	691.308	967.946	967.762	967.982	3	2	1	http://metlin.scripps.edu/metabo_list.php?mass_min=690.16&mass_max=690.46	1.64482e+06	1.63815e+06	1.54813e+06	1.57756e+06
1802	M499T914	2.58855	-2.96867	0.104274	499.403	499.402	499.403	913.72	913.589	913.867	4	2	2	http://metlin.scripps.edu/metabo_list.php?mass_min=498.25&mass_max=498.55	3.3014e+08	4.58957e+08	2.02458e+08	1.02384e+08
1803	M534T684	1.23588	-2.84918	0.104336	534.225	534.222	534.226	684.375	683.653	685.102	4	2	2	http://metlin.scripps.edu/metabo_list.php?mass_min=533.07&mass_max=533.37	1.33906e+08	1.47385e+08	1.20386e+08	1.07218e+08
1804	M615T649	2.61766	-4.05267	0.104382	615.438	615.433	615.439	648.817	648.791	649.386	3	2	1	http://metlin.scripps.edu/metabo_list.php?mass_min=614.29&mass_max=614.59	2.93452e+06	3.30018e+06	1.62968e+06	752099
1805	M487T660	1.58018	-5.63864	0.104481	487.284	487.275	487.29	660.312	659.322	685.304	4	2	2	http://metlin.scripps.edu/metabo_list.php?mass_min=486.13&mass_max=486.43	8.97022e+07	8.80137e+07	6.19569e+07	5.05087e+07
1806	M486T392	2.59033	2.87319	0.10455	486.22	486.082	486.223	391.721	391.368	402.463	3	1	2	http://metlin.scripps.edu/metabo_list.php?mass_min=485.07&mass_max=485.37	1.77837e+06	824087	3.91013e+06	2.8311e+06
1807	M1063T683	1.62742	-2.89215	0.104561	1063.43	1063.43	1063.43	682.796	682.506	682.909	3	2	1	http://metlin.scripps.edu/metabo_list.php?mass_min=1062.28&mass_max=1062.58	8.46747e+06	1.03788e+07	6.60543e+06	4.97505e+06
1808	M532T840	1.99694	-2.88066	0.104578	532.392	532.378	532.399	840.405	839.297	840.615	4	2	2	http://metlin.scripps.edu/metabo_list.php?mass_min=531.24&mass_max=531.54	7.50171e+06	9.75814e+06	5.3034e+06	3.33974e+06
1809	M733T472	2.44481	2.85902	0.104764	733.335	733.334	733.335	472.06	471.524	472.434	4	2	2	http://metlin.scripps.edu/metabo_list.php?mass_min=732.18&mass_max=732.48	2.41777e+06	4.90461e+06	1.0321e+07	7.58085e+06
1810	M514T740	2.43765	-4.62795	0.104778	514.396	514.395	514.396	739.677	739.612	739.759	4	2	2	http://metlin.scripps.edu/metabo_list.php?mass_min=513.25&mass_max=513.55	2.73045e+09	2.9474e+09	1.50975e+09	8.19483e+08
1811	M297T493	1.85455	5.89483	0.104907	297.133	297.126	297.139	493.279	489.461	496.377	4	2	2	http://metlin.scripps.edu/metabo_list.php?mass_min=295.98&mass_max=296.28	5.3057e+07	5.18708e+07	1.04879e+08	8.97146e+07
1812	M300T494	4.28255	2.89758	0.104943	300.217	300.206	300.217	494.16	493.669	494.182	4	2	2	http://metlin.scripps.edu/metabo_list.php?mass_min=299.07&mass_max=299.37	6.373e+06	4.03515e+07	1.20343e+08	7.97566e+07
1813	M567T536	6.77232	5.66316	0.105024	567.24	567.239	567.241	536.37	536.285	536.454	2	0	2	http://metlin.scripps.edu/metabo_list.php?mass_min=566.09&mass_max=566.39	672217	887123	6.06758e+06	4.49278e+06
1814	M223T432	2.51822	-6.00553	0.105038	223.121	223.116	223.125	431.732	431.57	431.893	2	2	0	http://metlin.scripps.edu/metabo_list.php?mass_min=221.97&mass_max=222.27	5.50891e+06	4.50375e+06	1.9864e+06	1.98969e+06
1815	M393T925	2.29382	-3.0336	0.105054	393.32	393.319	393.32	925.365	925.341	925.389	2	2	0	http://metlin.scripps.edu/metabo_list.php?mass_min=392.17&mass_max=392.47	1.99036e+08	2.69731e+08	1.2767e+08	7.66907e+07
1816	M1062T535	145.089	5.98112	0.105115	1062.5	1062.5	1062.5	534.685	534.685	534.685	1	0	1	http://metlin.scripps.edu/metabo_list.php?mass_min=1061.35&mass_max=1061.65	3166.32	24390.1	2.33082e+06	1.66731e+06
2011	M977T347	Inf	5.3555	0.117519	977.414	977.414	977.414	346.519	346.519	346.519	1	0	1	http://metlin.scripps.edu/metabo_list.php?mass_min=976.26&mass_max=976.56	0	0	3.00404e+06	2.0587e+06
1818	M394T925	2.29038	-3.00861	0.105241	394.323	394.323	394.324	925.365	925.341	925.389	2	2	0	http://metlin.scripps.edu/metabo_list.php?mass_min=393.17&mass_max=393.47	4.55335e+07	6.17173e+07	2.93598e+07	1.74668e+07
1819	M202T494	4.04544	3.00021	0.105318	201.91	201.91	201.911	493.834	493.669	493.851	3	1	2	http://metlin.scripps.edu/metabo_list.php?mass_min=200.76&mass_max=201.06	98254.2	970473	2.48427e+06	1.8392e+06
1820	M332T798	2.26313	2.8707	0.105352	332.204	332.201	332.207	798.456	798.405	798.507	2	0	2	http://metlin.scripps.edu/metabo_list.php?mass_min=331.05&mass_max=331.35	608975	1.21607e+06	2.32798e+06	1.80234e+06
1821	M675T648	1.07876	-3.11003	0.105401	675.365	675.365	675.365	648.167	648.135	648.192	4	2	2	http://metlin.scripps.edu/metabo_list.php?mass_min=674.21&mass_max=674.51	5.61722e+06	5.76686e+06	5.38719e+06	5.16578e+06
1822	M607T727	2.47827	-4.84804	0.105471	607.401	607.401	607.401	727.211	726.956	727.603	4	2	2	http://metlin.scripps.edu/metabo_list.php?mass_min=606.25&mass_max=606.55	4.00741e+07	4.27723e+07	2.16294e+07	1.17998e+07
1823	M923T85	1.56334	-3.9839	0.105508	922.8	922.799	922.8	84.9053	84.7912	85.0962	4	2	2	http://metlin.scripps.edu/metabo_list.php?mass_min=921.65&mass_max=921.95	1.43774e+06	1.33978e+06	1.004e+06	772660
1824	M500T914	2.64873	-2.98347	0.105532	500.405	500.405	500.405	913.72	913.589	913.867	4	2	2	http://metlin.scripps.edu/metabo_list.php?mass_min=499.26&mass_max=499.56	6.16175e+07	8.63277e+07	3.71764e+07	1.86787e+07
1825	M426T388	1.47278	-3.65028	0.105611	426.166	426.166	426.166	387.854	387.854	387.854	1	1	0	http://metlin.scripps.edu/metabo_list.php?mass_min=425.02&mass_max=425.32	2.37379e+07	2.19538e+07	1.73123e+07	1.37118e+07
1826	M456T497	8.87378	5.01167	0.105761	456.125	456.124	456.125	497.384	497.322	497.445	2	0	2	http://metlin.scripps.edu/metabo_list.php?mass_min=454.97&mass_max=455.27	433516	954934	7.21947e+06	5.10133e+06
1827	M273T460	2.87645	-4.9943	0.105776	273.146	273.142	273.146	460.371	460	460.447	4	2	2	http://metlin.scripps.edu/metabo_list.php?mass_min=272&mass_max=272.3	1.62738e+08	1.26124e+08	5.47678e+07	4.56555e+07
1828	M520T741	2.6831	-5.89552	0.105808	520.352	520.352	520.353	741.154	741.046	741.524	4	2	2	http://metlin.scripps.edu/metabo_list.php?mass_min=519.2&mass_max=519.5	1.90671e+07	1.93048e+07	9.18863e+06	5.1127e+06
1829	M548T703	2.16115	-5.11657	0.105853	548.335	548.334	548.336	703.241	703.068	703.415	2	1	1	http://metlin.scripps.edu/metabo_list.php?mass_min=547.18&mass_max=547.48	7.0407e+06	7.37774e+06	4.07385e+06	2.59778e+06
1830	M521T782	1.66122	-4.47945	0.105878	521.335	521.332	521.336	781.907	781.265	795.386	4	2	2	http://metlin.scripps.edu/metabo_list.php?mass_min=520.18&mass_max=520.48	7.60638e+06	8.0446e+06	5.37063e+06	4.05077e+06
1831	M856T711	2.40618	-3.64622	0.105907	856.452	856.451	856.452	711.263	711.064	711.461	2	2	0	http://metlin.scripps.edu/metabo_list.php?mass_min=855.3&mass_max=855.6	1.24536e+06	1.66321e+06	707748	501048
1832	M486T713	3.12067	-5.84688	0.105933	486.198	486.198	486.198	713.46	713.263	713.657	2	2	0	http://metlin.scripps.edu/metabo_list.php?mass_min=485.05&mass_max=485.35	1.72731e+06	2.1802e+06	643024	609112
1833	M497T393	5.7388	5.06976	0.106058	497.162	497.102	497.162	392.639	391.133	392.985	3	1	2	http://metlin.scripps.edu/metabo_list.php?mass_min=496.01&mass_max=496.31	615034	1.30561e+07	4.06868e+07	3.77689e+07
1834	M564T703	2.23825	-5.17726	0.106069	564.359	564.359	564.359	703.078	702.839	703.211	4	2	2	http://metlin.scripps.edu/metabo_list.php?mass_min=563.21&mass_max=563.51	3.27676e+07	3.42843e+07	1.84799e+07	1.14774e+07
1835	M330T292	1.47814	-4.65439	0.106176	330.22	330.217	330.223	291.877	291.625	292.128	2	2	0	http://metlin.scripps.edu/metabo_list.php?mass_min=329.07&mass_max=329.37	2.65781e+07	2.32616e+07	1.73585e+07	1.63593e+07
1836	M535T684	1.2158	-2.8217	0.106215	535.229	535.224	535.23	684.375	683.653	685.102	4	2	2	http://metlin.scripps.edu/metabo_list.php?mass_min=534.08&mass_max=534.38	3.97695e+07	4.35539e+07	3.60801e+07	3.24539e+07
1837	M531T823	2.4069	-3.82786	0.106295	531.418	531.418	531.418	822.626	822.515	822.778	4	2	2	http://metlin.scripps.edu/metabo_list.php?mass_min=530.27&mass_max=530.57	2.6736e+07	3.03174e+07	1.58231e+07	7.88098e+06
1838	M426T751	2.36033	-4.35858	0.106334	426.343	426.342	426.343	751.377	751.365	751.548	4	2	2	http://metlin.scripps.edu/metabo_list.php?mass_min=425.19&mass_max=425.49	2.12537e+09	2.31944e+09	1.21895e+09	6.64182e+08
1839	M367T756	2.39587	-4.54565	0.106401	367.296	367.295	367.296	756.41	756.335	756.446	4	2	2	http://metlin.scripps.edu/metabo_list.php?mass_min=366.15&mass_max=366.45	1.73232e+07	1.87224e+07	9.72392e+06	5.32094e+06
1840	M330T342	3.4071	4.12289	0.106418	330.263	330.262	330.264	342.35	341.626	343.075	2	0	2	http://metlin.scripps.edu/metabo_list.php?mass_min=329.11&mass_max=329.41	1.01932e+06	661566	2.40655e+06	3.32039e+06
1841	M695T309	1.69266	-3.12885	0.106445	695.322	695.319	695.323	309.148	308.942	309.414	4	2	2	http://metlin.scripps.edu/metabo_list.php?mass_min=694.17&mass_max=694.47	4.32543e+06	4.99515e+06	3.26251e+06	2.24394e+06
1842	M216T494	2.90297	2.88465	0.10646	216.144	216.14	216.146	493.669	491.623	493.851	3	1	2	http://metlin.scripps.edu/metabo_list.php?mass_min=214.99&mass_max=215.29	2.55286e+06	7.85561e+06	1.72888e+07	1.29267e+07
1843	M777T884	2.84763	-3.14111	0.106516	776.536	776.536	776.536	883.534	883.488	883.581	2	2	0	http://metlin.scripps.edu/metabo_list.php?mass_min=775.39&mass_max=775.69	5.60622e+06	7.9531e+06	3.14514e+06	1.61647e+06
1844	M459T345	1.99551	2.84837	0.106557	459.26	459.26	459.26	344.676	344.583	344.908	4	2	2	http://metlin.scripps.edu/metabo_list.php?mass_min=458.11&mass_max=458.41	9.99098e+06	1.71436e+07	3.01872e+07	2.396e+07
1845	M723T523	10.7381	5.68707	0.106771	723.353	723.353	723.353	523.022	523.022	523.022	1	0	1	http://metlin.scripps.edu/metabo_list.php?mass_min=722.2&mass_max=722.5	141154	205545	2.15652e+06	1.56636e+06
1846	M856T535	7.62701	3.41099	0.106776	856.387	856.387	856.387	535.324	535.324	535.324	1	0	1	http://metlin.scripps.edu/metabo_list.php?mass_min=855.24&mass_max=855.54	8910.35	284591	1.36885e+06	869689
1847	M324T411	1.85879	2.96776	0.106793	324.141	324.139	324.173	411.389	406.805	412.195	3	1	2	http://metlin.scripps.edu/metabo_list.php?mass_min=322.99&mass_max=323.29	4.92301e+06	6.97915e+06	1.24434e+07	9.68028e+06
1848	M459T657	2.55578	3.99168	0.106857	459.144	459.144	459.144	657.158	657.158	657.158	1	0	1	http://metlin.scripps.edu/metabo_list.php?mass_min=457.99&mass_max=458.29	422621	312952	1.07243e+06	807538
1849	M929T392	13.1048	5.86002	0.106921	929.323	929.323	929.323	392.495	392.352	392.639	2	0	2	http://metlin.scripps.edu/metabo_list.php?mass_min=928.17&mass_max=928.47	751196	624574	1.04341e+07	7.59507e+06
1850	M842T489	2.75802	-3.87749	0.107001	842.338	842.331	842.339	488.564	487.853	488.838	4	2	2	http://metlin.scripps.edu/metabo_list.php?mass_min=841.19&mass_max=841.49	2.60713e+07	1.92435e+07	9.70449e+06	6.72567e+06
1851	M596T683	1.43625	-4.20841	0.107105	596.211	596.206	596.224	682.606	682.284	683.109	4	2	2	http://metlin.scripps.edu/metabo_list.php?mass_min=595.06&mass_max=595.36	8.71637e+06	9.16614e+06	6.83029e+06	5.62052e+06
1852	M252T393	3.4521	-4.50364	0.107171	252.166	252.166	252.167	393.43	393.205	393.655	2	2	0	http://metlin.scripps.edu/metabo_list.php?mass_min=251.02&mass_max=251.32	1.79874e+07	2.43466e+07	7.14939e+06	5.1139e+06
1853	M460T920	2.03406	-3.00797	0.107175	460.323	460.314	460.326	920.098	919.855	920.215	3	2	1	http://metlin.scripps.edu/metabo_list.php?mass_min=459.17&mass_max=459.47	7.52274e+06	9.92277e+06	5.14467e+06	3.43202e+06
1854	M1061T535	58.944	5.85913	0.107183	1061.49	1061.49	1061.49	534.602	534.519	534.685	2	0	2	http://metlin.scripps.edu/metabo_list.php?mass_min=1060.34&mass_max=1060.64	59299	123657	6.2962e+06	4.48799e+06
1855	M409T752	2.32503	-4.35556	0.107205	409.314	409.313	409.315	751.694	751.681	751.869	4	2	2	http://metlin.scripps.edu/metabo_list.php?mass_min=408.16&mass_max=408.46	4.41457e+08	4.8083e+08	2.55375e+08	1.41303e+08
1856	M847T489	1.54794	-3.22383	0.107248	847.353	847.353	847.353	488.645	488.318	489.461	4	2	2	http://metlin.scripps.edu/metabo_list.php?mass_min=846.2&mass_max=846.5	1.52272e+08	1.26188e+08	9.79216e+07	8.1969e+07
1857	M530T436	1.24426	-4.35548	0.10725	530.134	530.133	530.135	435.651	435.271	435.832	4	2	2	http://metlin.scripps.edu/metabo_list.php?mass_min=528.98&mass_max=529.28	4.64008e+06	4.50567e+06	3.87002e+06	3.48033e+06
1858	M436T780	2.47105	2.83016	0.107277	436.269	436.269	436.269	780.385	779.384	782.986	4	2	2	http://metlin.scripps.edu/metabo_list.php?mass_min=435.12&mass_max=435.42	4.22827e+06	8.66342e+06	1.84395e+07	1.34165e+07
1859	M366T391	1.76819	-2.87816	0.107347	366.171	366.171	366.172	390.912	390.69	391.133	2	2	0	http://metlin.scripps.edu/metabo_list.php?mass_min=365.02&mass_max=365.32	4.39086e+07	5.55547e+07	3.28633e+07	2.3388e+07
1860	M830T468	2.11383	-3.85101	0.107426	830.33	830.329	830.33	468.035	467.943	468.127	2	2	0	http://metlin.scripps.edu/metabo_list.php?mass_min=829.18&mass_max=829.48	2.29565e+06	2.05615e+06	1.30194e+06	756788
1861	M604T539	2.44716	-2.9465	0.107559	604.336	604.329	604.348	539.315	538.893	540.727	4	2	2	http://metlin.scripps.edu/metabo_list.php?mass_min=603.19&mass_max=603.49	3.68801e+06	5.09882e+06	2.32437e+06	1.26625e+06
1862	M821T875	2.89944	-3.20691	0.107559	820.567	820.567	820.567	875.27	875.151	875.389	2	1	1	http://metlin.scripps.edu/metabo_list.php?mass_min=819.42&mass_max=819.72	3.94595e+06	5.60788e+06	2.15913e+06	1.13593e+06
1863	M475T746	2.54167	-4.78455	0.107592	475.323	475.323	475.323	745.943	745.641	745.989	4	2	2	http://metlin.scripps.edu/metabo_list.php?mass_min=474.17&mass_max=474.47	4.69251e+07	5.01414e+07	2.50339e+07	1.31561e+07
1864	M549T282	19.5115	5.7386	0.107677	549.05	549.05	549.051	282.176	282.158	282.193	2	0	2	http://metlin.scripps.edu/metabo_list.php?mass_min=547.9&mass_max=548.2	545263	919417	1.6644e+07	1.19341e+07
1865	M446T435	19.7563	5.85167	0.107702	446.181	446.177	446.182	435.317	433.194	436.256	4	2	2	http://metlin.scripps.edu/metabo_list.php?mass_min=445.03&mass_max=445.33	1.06401e+07	1.14933e+07	2.54106e+08	1.83167e+08
[truncated: 2,530 more rows]

## Sheet: 08190230vs08190210pos
	name	fold	tstat	pvalue	mzmed	mzmin	mzmax	rtmed	rtmin	rtmax	npeaks	510	513	metlin	510_1_pos	510_2_pos	513_1_pos	513_2_pos
[truncated: 4,811 more rows]
